# Supplementary material
Source: publisher figshare collection journal article supplement (https://gsajournals.figshare.com/ndownloader/files/35959253)
Supplement: Supplementary file 1 [file 35959253]

Archive with 4 entries (4 files):
- Bakovic_etal_Supplementary_tables.xlsx
- __MACOSX/._Bakovic_etal_Supplementary_tables.xlsx
- Bakovic_etal_Supplementary_figures.pdf
- __MACOSX/._Bakovic_etal_Supplementary_figures.pdf
