# Supplementary material
Source: publisher figshare collection journal article supplement (https://gsajournals.figshare.com/ndownloader/files/35959253)
Supplement: Supplementary file 1 [file 35959253 › Bakovic_etal_Supplementary_figures.pdf]

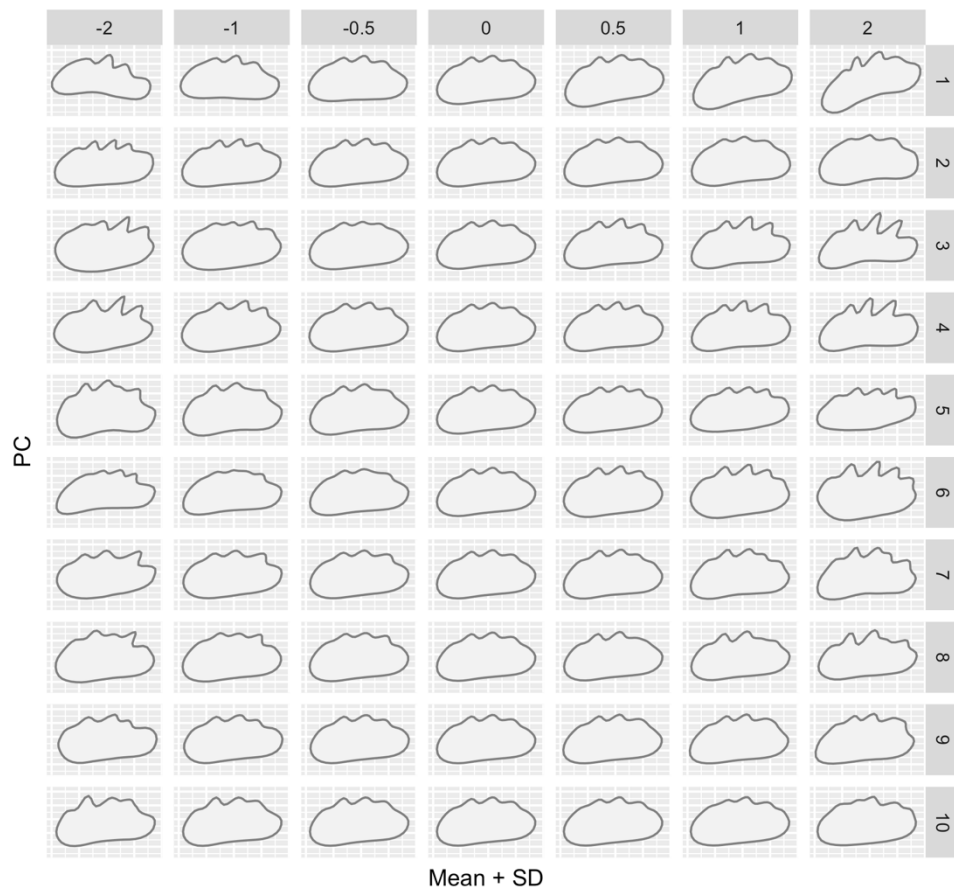

**Figure S1** Mean comb shape as defined by Principal Components 1 to 10 and 2 standard deviations in both directions for each, depicting the different aspects of comb shape captured by the different axes. Note PCs 1 and 2 were used for analyses performed in this study.

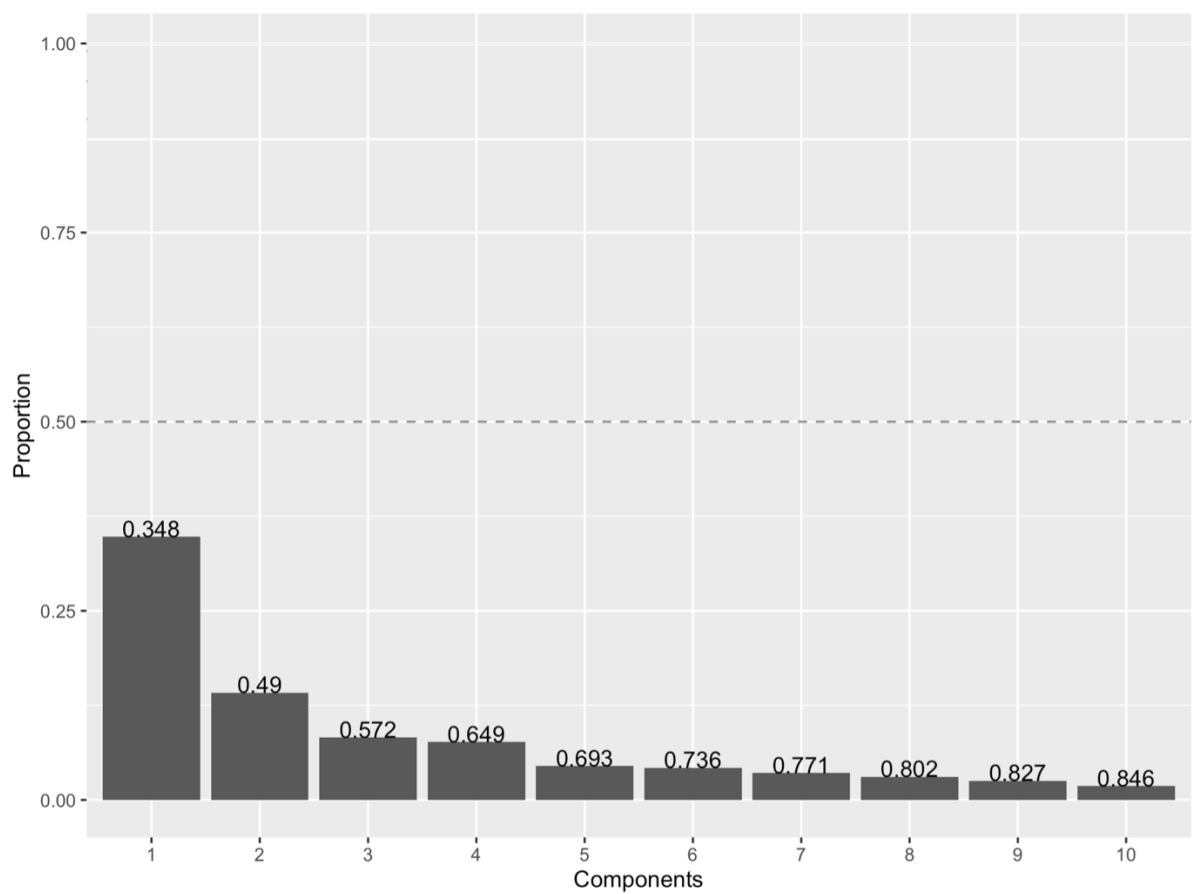

**Figure S2** Proportion of variance explained by Principal Components 1 to 10. Bars represent the amount of variation explained by each component, whereas numbers above bars are cumulative figures.
