# Supplementary material
Source: publisher figshare collection journal article supplement (https://gsajournals.figshare.com/ndownloader/files/35959253)
Supplement: Supplementary file 1 [file 35959253 › Bakovic_etal_Supplementary_tables.xlsx]

## Sheet: Table_S1
Table S1 Gene expression data generated using NimbleGen 12 x 135k custom gene expression arrays. Each row represents a single probeset and its expression profile for 39 male chicken individuals (Gallus gallus).
Sample ID	34006	34011	34046	34058	34109	34122	34128	34146	34151	34153	34167	34171	34183	34194	34203	34205	34256	34260	34263	34281	34318	34329	34344	34350	34387	34508	34533	34541	34550	34551	34559	34575	34607	34654	34703	34745	34769	34776	34784
sex	m	m	m	m	m	m	m	m	m	m	m	m	m	m	m	m	m	m	m	m	m	m	m	m	m	m	m	m	m	m	m	m	m	m	m	m	m	m	m
batch	1	1	1	1	1	1	1	1	1	1	1	1	1	1	2	2	2	2	2	2	2	2	2	2	2	3	3	3	3	3	3	3	4	4	5	5	5	5	5
X603002703F1	348.88951	386.82808	79.93322	394.73396	623.97499	297.26603	584.81754	746.05908	136.98983	542.38690	1140.68021	613.28575	96.24266	1595.46473	118.80668	276.82340	910.21778	225.68986	75.44115	279.49841	285.06331	180.37410	583.08180	154.17174	144.46536	166.05007	860.82396	338.41625	612.02540	560.39942	252.05285	268.40621	888.69444	596.66294	161.97571	331.64010	199.00735	235.49764	136.93951
X603002704F1	2081.208	2256.369	2513.630	2557.643	2073.335	2662.890	1725.528	2605.153	2693.272	2129.954	2145.143	2268.487	3374.833	2620.117	2218.242	2113.611	2334.377	1966.067	1897.117	2286.475	2095.914	2099.223	2303.262	2161.368	2737.313	2454.395	1987.429	2198.810	2285.529	2330.646	2416.908	2457.683	2620.955	2045.520	1923.540	2259.692	1882.244	1953.424	2484.063
X603002706F1	1581.479	1680.554	2276.414	1698.602	1254.897	2093.054	1736.185	1500.945	1321.293	1595.667	2128.685	1799.296	1119.419	1786.006	1554.688	1678.484	1974.180	1688.019	1297.334	1206.214	1405.678	1658.914	1759.805	2044.111	1411.203	1622.059	1689.012	1492.847	1758.943	1324.214	1863.670	1721.567	1644.659	1972.605	1268.361	1757.792	1568.280	1408.603	1328.798
X603002707F1	4225.468	3651.843	4495.540	3970.043	3248.934	4153.581	3993.561	3894.375	2981.697	4274.221	3400.783	3891.057	4669.070	5509.908	4049.921	4166.324	3626.657	4027.182	3864.614	3808.446	3714.288	3539.980	3726.560	4075.456	4068.602	3864.734	3630.347	4206.197	3052.445	2440.908	4503.022	3553.215	4199.805	4129.822	4191.007	3820.604	4152.929	3429.591	3960.784
X603002710F1	700.28663	140.05175	105.98566	345.10779	152.74567	99.44493	120.64727	168.12333	NA	993.69281	187.44575	66.63410	306.47747	482.99038	187.58473	84.15286	919.29395	153.26989	171.56129	149.70189	979.86324	41.05687	129.57342	83.53522	75.35256	1767.09811	67.16421	188.73859	90.61082	163.35869	182.25390	59.28747	355.52982	406.00570	240.70655	299.55563	284.65268	146.06657	69.93067
X603002711F1	674.6815	1239.0735	1603.4716	1049.5560	912.2083	1348.6929	1152.1735	1052.9238	1173.6011	686.1952	1063.3030	826.6674	1055.0863	466.7136	952.8539	1295.1811	725.2228	1240.9668	1162.3928	989.8698	1171.8047	1316.9419	1101.5815	1424.5895	1293.1864	1338.1480	1077.4764	1189.6055	1133.7934	779.2337	1391.6384	1187.3961	761.2351	848.5381	952.4392	1043.4316	950.1022	1011.1632	1261.8402
X603002713F1	1901.666	2372.586	1202.165	2439.117	1603.821	1858.401	2138.230	1777.146	1075.014	2367.134	2507.978	1547.556	2167.478	1851.218	1631.358	1546.120	2376.389	1250.643	1451.726	1126.045	1305.297	1355.214	1353.874	2601.268	1251.925	1540.972	1837.024	1665.283	1769.858	1698.230	1443.476	1624.833	2201.827	3077.848	1456.984	1140.657	1049.189	1678.290	1211.208
X603002717F1	17.911829	37.259764	66.079058	19.510673	41.878106	60.409348	38.937890	16.787284	30.532581	16.366797	64.932898	30.064142	8.626161	13.813148	44.792259	36.666707	12.919127	28.750559	54.295167	31.576950	26.104769	42.882517	48.818221	71.884431	40.024076	40.770194	42.745117	35.230449	28.929644	24.886033	42.231680	25.621107	8.896630	21.935559	29.616428	37.739381	49.775474	35.482403	38.167605
X603002719F1	310.69054	202.15958	149.10922	261.56568	144.77691	178.29938	318.03054	290.02673	88.39714	290.30340	180.43918	146.72733	392.48007	1212.57239	198.77353	174.66630	378.06000	147.37159	140.94553	116.81655	131.25531	151.84060	146.49219	178.00102	121.65298	133.31147	149.71916	149.06061	152.17083	135.82507	149.00703	193.50285	855.85238	455.84973	122.56527	168.50721	143.24594	165.53838	124.56554
X603002720F1	16995.400	13448.934	13976.343	18483.825	11420.495	13229.007	11939.799	17412.075	10851.446	17558.175	10649.557	12337.066	18534.953	14474.549	9553.774	14639.279	19673.916	13821.582	13030.277	13375.350	13415.112	9713.671	13607.871	12936.642	12405.930	12396.038	11803.356	12264.283	12234.547	10714.053	12947.540	11163.512	19321.648	18972.817	11442.926	12643.175	12424.297	11099.642	12593.272
X603002721F1	162.88395	219.25741	259.75590	123.98683	349.02441	237.19311	244.04582	133.64836	224.45731	103.64524	197.56105	266.23384	91.38295	138.45151	247.30865	299.27752	109.87815	275.55711	246.06126	376.68315	265.06288	314.52253	287.41292	139.25861	286.22036	219.77924	263.12662	252.79403	278.81103	315.95933	258.45055	318.66361	118.08256	120.26395	289.33444	340.49137	296.81313	277.46328	268.49843
X603002723F1	11262.417	9068.260	9677.862	12912.973	8303.949	8682.570	8328.295	13004.176	7650.759	11302.725	8207.491	9125.897	15011.857	8969.089	7934.790	8134.785	12574.208	8484.757	9571.023	8514.879	8105.207	7607.468	7876.355	8142.794	8999.578	7868.538	7834.340	8255.468	8624.802	9524.911	7849.429	9148.619	14913.993	12676.262	8238.193	8391.000	8002.079	8616.683	8570.556
X603002725F1	6368.881	8604.197	1998.406	7628.300	4958.510	7453.312	9360.675	5172.787	3433.980	8366.463	8553.887	4108.651	5043.835	11296.721	5355.392	5007.594	10347.663	4956.921	2744.751	3897.854	4860.787	2361.312	5197.066	9217.744	2660.518	3026.815	6056.822	5853.296	5961.979	6411.453	4691.763	3703.020	9145.955	10271.264	3989.554	3708.348	3256.868	4240.264	3806.157
X603002726F1	984.2872	263.1979	324.8916	390.1216	485.5862	339.8705	281.8022	453.6774	283.4412	581.4972	260.4889	322.9594	510.3195	1074.3033	399.7356	347.0289	495.2989	262.6522	260.0663	365.2760	358.4007	425.4174	370.3630	282.5615	266.7660	232.2014	312.1343	345.0235	348.1270	261.4927	286.7667	424.8547	1151.6392	791.9918	298.4220	347.3060	474.6956	368.8490	325.9615
X603002727F1	5685.788	7008.879	8020.506	6382.190	8039.225	7975.362	7069.022	6660.563	9385.861	5227.607	8476.070	7523.112	6971.119	6671.311	7294.755	7805.218	6080.118	8053.319	8279.704	8742.985	8251.750	8679.840	9375.127	7032.287	8256.203	9248.699	7177.632	8632.516	8250.688	7101.561	8034.775	7539.724	5924.796	6092.792	6710.855	7824.764	7628.761	6291.866	8207.684
X603002728F1	483.6381	986.2135	1039.9782	518.9332	715.1635	607.4297	668.0790	726.3602	3474.5110	558.5778	734.4602	1146.7222	409.7928	804.2892	869.3109	648.2630	182.7299	616.8243	938.1138	1439.9981	3027.3475	891.9181	600.1991	1070.5044	2304.4949	1317.2829	756.5749	2156.2473	1126.2706	1085.4962	837.2526	769.2881	152.5789	148.8904	985.5642	921.1342	713.6984	676.5127	1335.5079
X603002729F1	35.07205	43.38855	39.57874	28.31294	57.21358	40.71877	34.84338	52.09384	77.32660	40.55297	46.78084	39.22394	24.85793	21.01097	34.13101	37.56565	58.09183	26.15560	37.44523	39.03429	32.27532	65.11608	37.05395	39.31020	43.98513	99.75557	40.76667	39.86916	31.04690	38.45428	37.85890	47.78329	22.80981	23.14165	33.28180	37.93959	47.22299	49.50277	49.44199
X603002730F1	559.8910	557.8945	708.9536	639.4232	802.8917	596.4267	703.9771	773.4900	814.8964	495.8491	918.8417	728.1056	559.6121	271.9390	678.4429	1003.4992	568.0218	528.5512	1125.4717	884.2344	2186.3965	1103.7798	841.7230	1002.5058	733.3728	625.1698	754.2876	689.5270	768.9804	915.2811	683.6282	958.1294	155.2566	719.0571	754.1710	854.6759	836.7314	688.7765	540.4341
X603002732F1	54.97105	137.25233	252.16805	185.59410	330.01488	90.84332	78.79003	188.42129	226.93993	70.87388	178.91170	119.69340	346.90939	67.97426	199.68575	123.97076	78.64205	114.10286	122.69906	175.30247	177.38129	191.30974	135.78603	43.73337	204.92213	204.12322	121.80351	302.54146	131.05657	297.84746	144.05401	172.59251	75.33619	42.65987	181.16409	98.57166	147.82948	236.63658	179.78481
X603002733F1	117.20107	85.11629	79.90572	74.38067	107.38174	106.87622	78.08225	77.21353	84.11087	72.67984	91.84066	89.25046	57.03591	162.07950	117.78690	94.62065	77.38867	81.10486	87.27591	113.21838	92.48130	106.98873	89.75823	78.79061	90.45667	71.91883	99.20999	85.77997	103.83582	90.42038	85.20617	102.91389	93.75741	142.69271	81.37456	102.97854	107.28976	87.06610	100.36712
X603002734F1	1804.1620	4082.1913	2633.1435	1848.1433	1270.2916	2499.6657	2717.6294	1590.3653	1464.7528	2941.4007	4498.4026	1421.7455	1143.2701	487.4004	1818.3901	1776.2184	2730.3078	2047.4701	1652.5532	1218.1275	1658.2334	908.6133	2325.3578	2664.4494	1736.3961	2038.1752	2045.2241	1796.3320	765.3831	1113.9046	1768.9511	667.6377	1615.8315	1497.9111	1530.6185	1546.3237	1626.7224	1005.3173	1161.6124
X603002735F1	17411.26	20646.93	20198.11	17581.90	18833.19	20087.35	17586.55	15863.91	18385.27	17141.80	19645.75	18512.36	17675.85	16339.97	19504.01	16969.84	15431.94	20292.21	18467.71	19230.47	18447.18	19959.31	17616.32	18999.70	19480.61	16896.20	17714.90	18190.49	18046.40	17856.85	17599.69	19305.72	16890.33	17710.99	20145.26	19970.15	19233.83	19577.13	20311.27
X603002736F1	500.8366	246.1373	202.3739	345.5204	287.1150	186.9145	193.0385	207.5115	226.5652	286.2772	238.9176	166.3565	260.2933	429.3150	190.4745	301.1715	406.8771	160.3009	211.2470	230.3093	157.9414	173.1386	247.5402	126.6610	171.3856	172.0604	231.9428	172.2951	175.3492	141.9544	217.1864	245.9892	439.1679	359.0500	307.2584	276.8826	212.4105	206.2522	214.2129
X603002737F1	3003.361	4335.937	4934.416	2669.140	4373.753	4586.099	3808.561	2607.257	4945.227	2725.407	3967.353	4006.398	2723.170	2955.912	3686.944	3911.631	2240.173	4645.983	3530.169	4114.402	3963.788	5510.940	4517.539	4129.407	4131.236	4310.113	4385.002	3873.470	3867.659	4878.396	3654.406	4006.599	2267.811	2204.307	3530.896	5413.526	5604.280	4523.822	3635.406
X603002738F1	397.3050	517.4807	661.8750	396.5781	611.6286	638.1903	526.4134	307.2091	910.0221	426.5645	483.0522	375.2686	327.3740	328.3896	659.2447	594.0395	437.0338	612.7803	658.6315	821.2771	1418.0693	542.3978	802.7841	660.4397	572.3987	658.4174	591.4449	417.0440	475.2984	382.0763	549.1749	648.9159	289.6120	372.7726	441.9681	750.0755	827.7972	542.0810	574.0303
X603002739F1	337.3373	611.1942	952.0976	511.0796	557.4412	786.1874	536.8501	592.5163	523.1477	305.8756	719.7364	672.6522	691.9505	218.4757	558.5458	707.6902	352.7803	706.3321	615.0631	603.1239	650.2657	654.1265	814.2795	522.5660	651.9026	701.5293	543.5187	597.5007	653.5442	532.9808	643.9791	739.8688	403.5923	518.1963	461.8253	650.5537	738.5553	533.1920	704.6727
X603002740F1	231.79827	575.64103	498.22089	219.33225	311.36103	556.57699	826.51717	176.84348	212.53492	251.33225	592.84335	290.23533	54.02786	72.22919	344.24064	313.25668	269.62456	177.79483	277.32319	158.19785	357.94170	315.09919	356.30588	816.32927	295.73765	449.24889	326.57530	438.58678	303.92443	321.43184	566.09592	285.67824	50.57599	146.13145	262.62088	376.31602	429.98513	380.13848	274.12299
X603002742F1	3450.809	5116.999	5875.579	3641.458	7889.439	4929.595	6041.371	3732.214	8374.382	4152.452	6450.978	8989.211	2891.984	4773.789	5519.760	5879.898	3621.336	5396.347	5488.839	8021.405	8487.703	8067.000	6706.731	4002.540	8881.754	6975.821	6017.432	7667.823	7905.052	4882.037	5947.456	6251.733	2313.841	2104.038	6030.154	6438.940	8103.036	5788.882	10656.563
X603002744F1	2630.176	4382.685	4025.573	2429.212	6070.018	3691.083	4224.939	1896.441	3209.875	4205.496	3928.378	4595.135	2259.543	1614.651	5291.652	5303.426	1911.584	5073.398	5459.032	5146.844	2902.378	4695.794	5577.817	2409.407	3907.121	3238.686	3916.687	3334.671	5007.298	4378.091	5281.418	4923.129	1679.443	1410.191	4693.193	5975.598	5907.622	5386.000	5406.901
X603002745F1	17838.17	24177.86	26395.14	21730.30	19474.08	23734.59	28202.56	21596.93	21375.58	22779.22	27038.81	19102.75	23630.95	22683.91	23604.37	20986.25	21922.69	24047.31	20060.31	16008.50	21512.08	20292.84	23304.19	19923.05	19622.21	19895.85	19022.12	19822.56	21781.94	16263.22	22103.15	14330.68	25533.63	24918.47	19793.22	24643.23	20803.01	13256.73	19957.82
X603002747F1	3186.079	2451.734	2874.152	2437.275	4690.464	2534.089	3137.646	1559.266	3609.828	2949.553	2619.412	3518.483	1238.581	2272.765	3778.878	3606.391	1881.633	3626.897	3209.858	4732.149	3976.734	3357.874	4467.336	2140.306	3546.306	2332.973	3564.322	3556.324	4077.557	3381.320	3584.037	3585.350	1388.235	1803.871	2580.128	4103.937	4110.826	3431.934	3248.000
X603002750F1	3147.063	5023.525	4645.745	2509.728	6331.398	4835.788	6138.694	2403.999	4815.832	3082.564	5821.176	5702.949	1666.372	2958.963	6603.169	5681.444	2242.023	4949.302	5410.966	6526.114	5818.676	5404.100	6250.668	4039.879	5765.211	3643.986	5957.815	5545.032	6844.280	7323.223	4874.531	6053.883	2179.561	2314.594	3954.387	6330.608	6718.666	5835.012	5021.772
X603002751F1	197.13982	342.20850	460.88212	285.07721	251.94776	424.64038	220.75094	273.25329	410.62335	254.24460	218.45670	285.80527	322.31837	78.43757	335.59126	438.05693	316.00314	412.82285	446.02525	321.65012	384.91395	388.38966	390.19322	339.35315	418.82137	421.67021	367.90939	288.61960	315.37310	244.97462	482.51929	534.62815	135.46022	244.57555	354.52926	465.11659	300.34346	347.51506	393.87317
X603002752F1	268.78774	46.73830	40.57243	107.87491	65.10047	56.88135	91.02312	96.70777	57.67986	134.83594	45.56855	69.53674	156.27512	279.26873	62.08286	63.16220	133.73491	50.51737	56.66377	53.21222	53.46123	58.33665	60.43363	44.56530	39.12060	56.83465	57.99366	44.75098	58.10182	74.26760	53.56209	59.56085	333.92674	224.15073	46.75522	86.06462	88.80481	85.46645	47.93018
X603002753F1	17167.01	21331.15	22690.31	18527.76	17389.64	22051.64	21163.78	19750.89	17822.57	18793.01	20217.87	17642.13	20268.64	20147.14	17686.81	22638.44	19121.04	22264.07	20618.34	19013.25	15501.11	15964.25	20619.60	22614.37	18692.87	21939.39	20286.40	20095.75	16919.25	15030.08	20899.47	19374.26	19322.30	17723.82	20707.92	17568.78	14873.63	16088.38	16771.64
X603002755F1	125.83514	117.73039	171.13276	173.99946	142.36926	203.76557	139.48490	231.70225	109.48402	95.17270	149.77067	212.55345	82.01379	123.02773	191.92358	189.38348	121.18534	214.63793	283.22085	161.07643	131.79897	251.84625	142.94074	197.60257	145.85844	220.48430	240.84247	129.90358	148.34405	174.75661	177.98935	90.21943	77.57761	130.69346	192.31992	173.03757	138.76340	194.29262	190.40331
X603002757F1	1311.2723	1001.1413	846.3236	1702.6553	1023.4561	848.6817	713.3389	1760.6007	727.2407	1437.9943	850.8368	1084.9913	1942.2761	752.4063	1137.4406	1030.6574	1568.7608	1071.5348	959.8239	872.3214	880.9129	1001.7730	761.9682	595.3384	1002.8916	927.4328	911.8278	1043.2436	994.9443	914.6444	965.5250	1049.2404	2171.6701	927.4083	1067.3045	895.1080	858.8509	1284.3206	649.1441
X603002758F1	5444.493	8062.449	8541.506	3874.358	7523.410	7922.134	9891.726	3625.658	8154.718	5977.182	7921.719	8579.211	1974.740	3272.882	11742.914	7802.689	4139.602	11889.984	8616.473	8944.510	6606.889	8677.160	9122.738	9820.966	7304.849	7840.726	11299.822	7535.352	8575.886	10729.395	9865.955	6230.827	3530.498	4650.905	5943.797	12182.358	9929.360	11029.868	5180.666
X603002760F1	2279.9993	1136.7949	1332.7620	2167.1000	1374.4145	1311.7783	1052.2140	2164.5753	1379.6429	1990.9356	1210.4621	1304.5111	2405.1827	2640.5779	1168.6877	1342.5471	1616.5623	1133.8951	1481.5849	1559.4249	993.5739	1198.0218	1760.5232	1135.9265	1267.6405	1372.5788	1352.6192	1456.8879	1319.6815	1370.2869	1283.0461	1284.5219	2164.1129	2363.2198	1524.4819	1623.0993	1404.0612	1247.5068	1334.4753
X603002761F1	1348.414	2001.333	2208.740	1846.082	3011.032	3207.536	2436.045	1695.295	2936.326	1370.719	1889.916	2429.486	2154.320	1764.470	2838.237	2900.845	1640.567	2546.878	1430.988	2693.551	3818.806	2014.869	3021.256	2231.169	2052.277	2098.942	2271.338	2229.954	2222.028	4151.693	2776.231	1955.262	1832.583	1513.762	2464.511	2436.655	2583.169	2867.833	2450.955
X603002763F1	1364.0012	1178.4582	1902.0963	1107.0302	1712.6239	1422.2569	1749.8651	1230.6978	1882.3391	1394.6938	1458.3306	1708.1769	1527.7250	2790.6728	1340.9852	1468.8446	948.6672	1352.2062	1165.3433	2258.5168	1752.8409	1544.2697	1859.3608	1326.0106	1553.9518	1318.8913	1298.3428	1751.7393	1420.9304	1173.3210	1408.0027	1491.8239	1010.8222	1188.3295	1009.7512	1802.3184	1889.2028	1526.9919	2283.3711
X603002765F1	597.0854	756.4363	1497.7707	1144.7872	877.2584	1147.6554	661.8553	1625.6633	731.5126	1817.6058	1081.2862	1143.6993	1586.9457	596.1587	573.6007	1132.1390	1677.1352	1097.7568	906.6182	746.4394	690.3266	906.4995	981.3317	671.6252	989.2980	1551.8547	830.3461	695.9275	614.3216	426.7891	1237.8812	1004.2463	1290.0390	591.9039	893.3052	732.0802	707.2830	542.8155	924.3842
X603002766F1	216.4790	364.6655	589.0764	371.7374	335.8172	330.4632	302.5909	485.3427	416.0127	141.4627	420.3992	373.1231	598.5843	374.2706	374.2492	461.5461	293.9238	371.7808	462.8066	308.0890	297.5857	401.2440	446.5619	379.7944	305.0578	396.6676	535.4020	366.0354	335.2780	346.7446	451.7658	287.7192	345.9615	591.4340	339.1810	364.7439	364.1374	400.7278	342.1332
X603002767F1	897.6304	1526.9119	2048.8317	1541.6262	1796.1958	1847.9392	1021.2489	1500.6358	2477.6751	528.7876	1135.2744	1449.3929	1999.9906	1369.6511	1823.6362	1476.9902	1050.6209	1195.5383	1327.6895	1672.6826	1958.2871	1905.1107	1520.9409	1282.1258	1641.7000	1568.5638	1263.9686	1587.4534	1234.3781	1732.3011	1322.4833	1496.8665	1586.3033	674.2806	2099.4354	1658.2027	1646.5131	1852.4929	1890.0050
X603002769F1	1556.315	1476.569	2749.874	1822.087	1984.928	2119.887	1082.533	1823.839	2438.210	1414.063	3780.320	1963.924	2488.300	2162.858	1380.602	1972.406	1645.551	1482.077	1457.021	2394.656	3246.766	1826.077	1929.245	1150.784	2679.075	1634.753	1137.177	2184.219	1417.351	1586.018	1729.208	1786.439	1387.914	1389.883	1710.969	1863.193	1924.712	1534.334	2309.313
X603002770F1	2199.0463	169.4944	340.4628	882.5550	435.7856	315.0982	375.0489	854.3350	107.6224	2175.0168	481.2297	184.7074	631.4936	1789.2140	313.4670	237.5414	1878.8080	138.8413	213.9045	342.4737	220.0368	329.3138	175.8049	646.6094	166.8470	138.8413	341.5803	245.7782	215.9530	201.1270	167.9562	186.1658	1899.8231	2173.5429	223.1804	315.0204	185.9504	199.9588	261.5289
X603002771F1	5210.964	3470.154	4853.161	6120.208	5543.463	4128.898	4043.348	4969.284	7047.305	5031.483	2955.727	5182.656	4443.884	3881.750	5087.719	4130.562	5568.690	4128.087	4880.072	5265.734	4483.109	5505.453	4723.141	2855.065	3414.349	4907.084	4328.255	3998.239	5533.931	4286.960	4912.174	4303.815	5534.241	4936.626	5245.283	4070.866	4363.489	5381.683	5989.142
X603002773F1	27491.35	31662.51	30578.75	29154.25	33131.65	31770.07	28908.48	24576.42	31849.35	28706.40	29296.08	30651.52	28285.18	30378.81	31625.53	31035.86	25210.35	28584.59	31819.82	32403.02	33293.24	32365.06	29459.66	30341.63	32757.62	30385.66	29182.83	34133.92	29416.06	29578.33	31782.00	30069.60	24138.96	26014.44	34767.69	31395.64	33177.56	32955.63	35353.88
X603002774F1	26.97765	51.74708	74.52273	33.31317	55.93523	59.08482	26.35638	31.77262	49.11840	24.06518	68.88753	59.02948	52.65731	36.43430	43.48693	45.89541	19.79296	39.15860	40.44204	34.59469	56.66209	41.91075	74.39712	25.20272	60.33420	59.74055	39.28343	30.40167	24.17212	46.12103	61.27152	71.08986	22.70043	29.64254	47.43496	29.34206	46.37789	36.82212	53.71893
X603002776F1	44.803308	78.614880	153.819660	49.272000	83.815515	70.397357	68.991078	79.679585	649.035958	11.346769	65.723019	85.957881	9.302146	13.131588	107.904370	117.735101	3.693953	128.925899	153.022455	130.241217	654.037473	92.386779	135.494398	50.021436	140.418511	267.747444	125.064204	189.237268	113.190635	97.043472	64.687617	54.948049	20.376788	-1.104126	117.735101	111.573503	282.077654	64.644534	168.317970
X603002778F1	8614.485	6255.031	5348.523	8757.931	4734.988	4912.924	5704.790	10128.416	2507.731	10419.795	5225.525	6127.336	10095.802	9670.200	5290.367	5997.900	9998.095	6134.233	6560.120	4390.113	5289.790	4680.261	4501.078	4600.337	3945.425	3525.985	5857.727	4568.661	4821.008	5170.991	5522.513	6516.660	11909.486	9952.865	4573.614	5249.175	4611.713	5972.044	2861.824
X603002779F1	15547.18	14016.41	15098.73	16724.77	11394.72	13714.48	14173.26	14392.50	10342.76	16565.90	12712.18	11263.10	16123.39	15465.17	12632.26	14034.45	16114.38	15663.35	11639.95	11730.70	12836.99	11178.47	13557.85	14601.75	11862.96	13752.82	13255.11	11076.36	10723.07	9202.99	14151.41	10217.75	12630.53	19332.48	11506.50	13038.40	12021.83	10756.14	11406.11
X603002780F1	6604.269	5170.950	7454.480	8489.222	6613.829	6001.076	5528.473	7628.600	9728.435	5744.485	8509.213	5674.621	9415.605	9706.195	5987.549	4984.776	7003.312	5055.695	3346.910	7524.825	5873.901	6804.107	7847.446	5473.410	5535.279	6089.743	5096.564	7959.128	5909.211	5463.647	6261.699	4332.055	7709.449	7699.130	7071.812	5864.452	7283.557	6211.789	7693.486
X603002781F1	1946.931	2334.380	3851.001	2466.876	1988.019	3747.451	3053.843	2044.732	1738.502	1997.793	4474.081	2129.962	1661.817	2496.709	1901.376	2334.539	1886.068	3317.637	1654.862	1446.782	1727.364	1527.303	2711.213	3714.977	1867.558	2027.007	1997.475	2003.257	1938.798	2008.298	2573.634	1910.363	1644.350	2766.555	1958.246	2415.092	2051.561	2017.558	1733.283
X603002783F1	5040.675	3516.701	3545.559	5496.805	8023.108	3419.261	3620.634	4099.641	7360.925	4620.375	3574.697	2744.766	5633.136	5883.498	6520.842	4259.833	3949.001	3005.321	4276.893	5582.356	4895.429	4191.943	4606.599	2534.946	3562.778	3677.919	3567.653	4324.481	4558.490	5788.744	4191.198	4363.588	4404.560	3837.209	5710.309	4583.439	4990.731	6307.450	5839.707
X603002785F1	1515.250	2195.752	1565.169	1357.869	2311.976	2218.541	2628.931	1151.520	1974.078	1475.584	1543.281	2293.773	1100.328	1976.038	2222.154	2156.900	1436.934	2032.810	2342.899	2064.633	4063.549	1820.570	2944.984	2694.945	1382.819	1903.088	2511.218	2246.491	2485.248	2713.370	1966.958	1675.314	1649.863	1893.342	1633.255	2160.240	2109.986	1904.804	1808.393
X603002786F1	1102.0432	1953.2154	1549.8590	1239.0067	764.7235	1193.8256	1608.1293	1794.1433	1386.0414	1312.3892	1407.9616	1116.2185	930.9500	620.9902	1222.4045	1082.9427	1425.1427	2054.3130	1665.7895	707.6177	855.6601	1377.6548	979.7237	1940.1304	1229.7492	2017.3577	1543.9613	879.3319	1284.6560	1239.0848	1410.1761	1485.0424	1716.1654	1978.4980	1285.1370	995.6691	1050.6215	993.3434	1124.3473
X603002787F1	222.07543	455.13035	429.70334	356.93309	437.78533	541.43559	576.76736	192.30296	316.95662	262.30428	335.72978	453.72856	135.46663	61.48513	315.70299	338.40366	260.09372	473.78511	339.87998	314.05853	281.87346	373.29707	552.86008	739.80745	348.35740	509.15592	648.49763	264.28369	391.00766	507.94154	408.47324	344.52603	199.15474	350.97847	375.23601	539.77046	386.25047	443.24073	392.38957
X603002788F1	3678.523	5090.600	5958.799	3135.114	6208.427	5589.620	4875.364	3165.612	6313.158	3171.095	7664.659	5377.046	3858.994	5732.853	4932.537	5503.139	2332.233	4989.910	5525.135	6736.226	5498.420	5323.188	5688.880	4274.906	5865.275	5237.238	4423.619	5384.634	5001.534	5151.067	5014.037	5450.416	2654.715	2960.821	5972.651	5902.396	6087.103	5227.692	6418.099
X603002790F1	5626.1887	3790.9427	4485.7335	6436.3916	1699.0186	3068.2531	5798.5530	5595.1645	1149.9694	6809.7669	4789.6087	2139.4668	5799.3186	3665.7759	1601.2424	3207.3312	6602.3006	4519.9721	2102.9465	1621.9958	2009.6838	907.1024	2484.3438	4797.2497	2410.0221	2663.3388	3121.3794	2416.2754	1403.0967	2042.3689	3424.3149	1175.1699	7584.6478	7570.2333	1913.8046	2142.8132	1282.4136	1671.7422	1729.2360
X603002792F1	1453.492	1554.592	2242.972	2217.653	1999.393	2150.145	1299.352	1690.066	1621.695	1545.553	2212.725	1753.864	2229.514	1590.445	1687.781	2066.483	2237.916	1416.159	1463.565	1950.021	1657.957	2074.269	1815.480	1196.173	1705.181	1662.830	1434.309	1968.361	1322.582	1295.831	1564.738	1537.546	1900.129	1045.115	2058.134	1966.699	2220.947	1728.133	1993.550
X603002793F1	8958.596	7981.114	7062.470	10594.866	3350.615	6975.460	10300.609	9696.278	1748.518	10424.991	8996.305	4004.840	9066.542	9380.992	3262.875	5809.635	9476.819	8035.550	4036.950	3974.366	4848.805	2379.982	5452.349	10018.908	4546.837	5443.973	5236.044	4764.889	2730.060	3432.269	5567.859	1961.452	11296.630	16538.763	4351.477	4638.217	2095.450	2817.365	3107.596
X603002794F1	119.01599	125.48903	139.24712	112.72055	135.80482	141.86761	115.05899	72.24910	115.64249	77.19694	94.95264	142.03241	63.58129	79.57976	109.88353	139.31049	88.62083	131.86236	140.61848	130.33093	145.88301	171.10184	132.06589	138.28872	163.60781	143.73941	188.57074	114.96041	132.31670	131.04853	111.17386	133.56515	107.63773	81.59310	129.89944	160.89305	168.51588	141.58886	128.70651
X603002795F1	1851.265	3100.775	3937.265	1813.265	4212.282	3539.264	3215.307	2068.864	4034.703	1972.675	3953.786	3424.551	2320.070	3918.961	3602.595	3486.120	2013.021	3034.742	2876.622	4492.966	3753.508	4822.890	4128.708	2867.954	3851.134	3506.748	2781.985	4089.523	3385.578	3507.040	3398.632	4263.119	2000.030	1646.539	3576.555	4275.959	5355.177	3874.812	4280.590
X603002802F1	323.6392	523.5714	622.4672	931.6322	571.1395	858.8520	580.6974	554.4740	342.5311	225.1137	615.4741	623.0990	869.2073	735.1212	917.6629	749.6384	418.8936	698.5410	547.1318	465.4902	638.0281	634.8368	466.0147	590.0614	478.8266	1108.0161	719.5814	271.4177	887.0565	459.3746	840.9991	745.2372	509.2923	224.4876	448.2815	689.1101	466.1858	899.3290	407.3917
X603002803F1	66.55731	35.93833	41.30882	36.22346	59.45117	35.60336	34.27462	39.96503	43.02941	29.25431	31.61711	47.64066	45.70266	59.86143	72.84254	52.46150	56.19704	29.38591	31.61093	40.70329	39.15851	72.59557	44.55578	34.29263	28.49347	29.13894	58.46639	41.42627	53.34518	43.44666	27.42609	53.59354	81.10722	63.44723	48.78694	47.52400	45.77568	49.04537	55.18754
X603002804F1	1227.31777	174.54569	223.85594	418.72581	236.20131	214.26850	268.95466	384.24126	139.55515	894.06407	205.97100	200.06874	569.27582	1169.42140	179.79212	185.87108	690.02764	156.75511	194.89284	210.74525	156.85719	163.53088	232.74788	251.05412	139.58078	151.90064	262.86635	189.16317	139.07061	120.93600	151.56549	98.99735	1122.00193	904.40289	200.66642	204.44968	104.42068	151.67580	175.46798
X603002805F1	24947.51	23364.31	23048.02	25442.32	23401.29	21691.40	22940.54	21305.00	23137.87	26120.66	19608.83	21354.53	25221.46	26089.73	22448.42	22294.14	25322.21	22010.66	22158.34	23253.37	22472.99	23104.83	21669.89	22519.89	22866.00	22907.45	21443.59	23287.59	21067.73	22557.71	22167.39	23009.67	25632.86	24239.45	23240.54	22004.27	24760.02	26177.84	27173.18
X603002806F1	298.313488	503.565594	579.235908	388.473863	256.773591	346.059541	296.365705	424.694863	1322.086921	634.805520	910.053981	474.701830	369.110616	2.478489	493.518481	332.585232	403.741762	289.971521	403.113130	308.473974	327.762628	671.027750	547.008344	331.148545	384.446998	697.629683	385.188196	346.652131	571.370350	491.152241	273.271302	346.493504	1138.993903	268.327554	203.633006	233.606402	417.776700	295.444025	349.238333
X603002807F1	1956.2672	2721.1317	3732.9455	1299.2129	5304.6784	2421.0333	3110.0509	941.4880	6323.9180	1840.6111	2125.1991	2914.2238	818.4043	398.3771	4952.2508	2536.5349	1035.5940	3220.8990	2865.9737	3682.9181	4419.5414	4053.5273	4416.4817	1783.1743	1400.6176	2995.2226	3946.9484	4400.6845	4299.2472	5884.7833	3085.8886	3151.9385	419.7066	549.1070	3571.1109	5554.5718	5199.1608	3954.3168	3196.2158
X603002808F1	4265.347	5455.351	5593.777	3372.756	8031.931	4925.762	7423.565	3476.160	8908.578	3484.614	6804.361	8848.783	2663.057	4937.977	6166.939	5669.021	3584.383	7752.732	5717.681	7726.662	6824.864	10195.813	8447.926	3899.734	7333.575	6841.023	7298.406	7593.100	8496.387	8897.733	6471.315	6834.497	2943.639	2566.748	6304.498	9278.172	9244.007	8640.654	8624.711
X603002809F1	4913.741	5636.177	5102.820	5785.333	4111.103	5200.557	5009.965	5672.799	3886.451	4973.442	4462.397	5123.310	6153.235	5442.665	4461.844	4786.762	5379.398	5550.143	4463.032	4064.485	4115.674	4063.586	4954.361	5791.889	4486.893	4532.917	4963.336	4342.798	4222.095	5091.143	4917.895	4684.300	7038.161	5889.752	4432.732	4830.910	4701.351	4710.548	4317.282
X603002810F1	11656.291	8650.111	10510.359	11116.896	10089.914	10479.846	8383.664	12625.534	11414.684	12880.340	8912.574	9835.596	15712.335	11455.745	8869.411	10836.861	13101.791	10107.905	10456.477	10298.463	9122.152	8741.424	10730.869	9820.249	9566.109	12023.782	9457.162	9050.524	7799.951	8075.437	11022.252	8747.226	11891.132	10732.551	10934.742	10037.408	7836.291	7327.166	10001.030
X603002812F1	123.66991	133.73468	161.55845	151.42874	156.62611	118.84260	115.64371	172.56543	2776.99261	63.01765	164.26149	138.41622	184.20751	117.46086	202.37130	143.19864	77.87582	133.18002	434.89455	221.38150	2062.93095	171.69858	197.65968	101.59803	237.55692	156.39196	96.49287	292.51235	162.49098	183.38791	145.36699	173.18917	76.42635	26.11279	270.21488	174.46543	149.30052	183.28289	193.57545
X603002814F1	1957.879	1856.399	2472.227	2132.136	1817.114	1726.391	1806.504	2021.837	1833.219	2260.410	2483.508	1758.607	2217.647	2611.204	1946.763	1886.118	2251.180	1756.218	1515.034	1789.661	1596.383	1896.885	1946.541	1754.967	1593.159	1754.317	1566.873	1743.054	1752.276	1406.615	1821.132	1782.758	2109.694	1798.442	1664.483	2009.608	2361.105	1975.779	2052.680
X603002815F1	3310.939	5730.253	3416.462	3001.668	5966.122	7971.939	6575.864	3793.476	2657.526	2943.266	5769.898	5725.022	3630.548	3069.340	5892.351	5198.924	2625.517	8045.731	4973.166	3689.896	7210.976	3246.354	6555.328	6997.378	3207.210	3142.910	7399.831	4785.231	6956.745	6840.563	7015.572	5317.655	3808.668	4022.040	4812.399	5855.845	4741.908	3036.174	2146.522
X603002816F1	1768.5696	2161.1109	2616.0890	2053.0018	3694.8249	1862.8507	2380.1169	1830.9751	6581.9273	1245.8445	5250.7899	3385.2750	1846.8224	806.4227	2300.3979	3445.1690	1424.4025	2482.9754	2279.2689	3489.9866	4915.3459	4249.6246	3235.7876	1248.7073	2032.9155	3542.8637	3579.9674	3888.6708	3704.5439	3756.6472	2599.7341	3388.1043	1030.9649	778.1577	2924.9318	2858.6259	5205.0383	3991.8031	2447.7118
X603002817F1	2325.001	2540.171	2427.141	2700.385	1485.851	1958.984	2455.108	3184.089	1704.504	2534.035	2958.978	1855.152	3013.631	1985.878	1874.462	1508.280	2732.688	2309.131	2385.125	1352.079	1091.786	2092.827	1776.209	2249.654	1335.450	2580.408	2171.799	1726.836	1952.808	2193.596	1653.642	1787.295	3291.427	2423.546	2227.251	1736.806	1775.908	1956.166	1845.195
X603002818F1	39.25246	19.34003	30.74302	25.29016	20.76436	23.96672	24.01091	29.30026	27.66943	23.86266	25.59249	16.00461	11.63136	18.13078	24.71691	18.02646	18.70158	18.24492	NA	23.90754	NA	24.80180	20.73486	25.05037	29.54605	21.88160	22.88447	20.77087	17.87364	18.15327	16.27386	19.81069	15.55348	21.29756	24.32227	18.16966	17.79046	19.39309	31.49987
X603002820F1	386.8614	640.6654	1095.3369	620.0868	627.8275	627.1979	582.4419	758.5470	565.8568	641.2279	1002.0309	757.1951	1005.3901	483.2529	637.3286	629.8820	717.2203	711.3288	927.6022	810.5675	649.7174	1101.9369	759.2400	440.7727	805.9309	976.8356	634.1720	601.7088	673.1669	342.4011	560.6786	784.1588	555.6255	377.2176	661.6903	599.5169	820.2785	539.6652	974.8913
X603002821F1	272.2121	202.8183	299.6637	113.0924	155.2223	176.0320	308.1771	164.6460	136.4967	201.3409	281.7818	164.2495	208.1118	256.2433	241.1309	211.4796	155.3995	201.3796	209.7059	144.5589	195.3848	155.9092	186.3439	279.9461	143.7061	112.8604	151.0007	188.0800	175.7214	173.0127	155.4364	167.3006	231.9682	NA	193.2801	165.9614	187.5191	206.3941	179.4194
X603002822F1	5145.267	5035.165	6070.098	5400.104	4184.810	4488.531	4980.568	5918.725	6123.881	5924.845	7142.658	5394.125	5454.160	4763.411	4264.287	4780.286	6219.613	5808.703	5195.102	5217.144	4457.740	5222.373	4609.768	4355.967	5398.336	5753.840	5615.288	5103.136	5087.370	5381.322	3739.099	5517.991	5517.702	5704.756	4259.539	5141.852	5443.862	5334.285	4959.818
X603002823F1	5589.359	9392.459	10472.857	5262.047	12391.392	9015.574	9314.819	4870.045	9791.418	3833.160	8516.217	9169.787	4210.157	5659.209	10778.801	9076.860	3832.408	8497.913	8750.491	10504.854	10671.284	8953.623	10663.830	8399.701	9991.652	7468.552	8692.024	9639.754	11395.615	12492.922	8783.034	10366.445	4046.324	3733.724	9647.610	10589.581	10048.558	10945.446	11024.292
X603002824F1	32.49195	96.23665	114.21590	48.89960	183.35704	81.36243	70.40406	41.52265	150.18349	27.74131	144.45686	63.87331	85.59586	19.71678	155.36264	79.39704	27.65744	77.23497	43.76269	40.03637	90.74120	89.64716	71.98608	51.93396	58.04934	173.50322	50.07873	54.04725	78.05893	117.45797	67.85626	80.51459	28.06061	17.44526	142.72028	109.81486	93.41513	142.83674	80.30759
X603002825F1	575.7325	1303.3237	1865.8736	904.4373	1578.5175	1591.1922	1273.3473	925.0610	1796.6819	668.6582	1740.7054	1545.8410	1262.0326	583.0359	1362.4091	1573.7717	570.2353	1173.9187	1697.3293	2120.8861	1614.4168	1606.6899	1620.2565	1122.2877	1832.4440	1804.5412	1453.3068	1544.8653	1723.0032	1529.3082	1344.7860	1876.3645	595.7775	342.9810	1270.3236	1530.1464	1914.6080	1573.9162	1998.3590
X603002826F1	4601.458	6182.462	8881.414	6039.315	8028.010	6351.804	6486.161	5443.949	7888.584	5105.656	5591.216	6711.587	6574.836	6932.951	7531.468	6448.848	4517.765	6148.852	6976.982	8045.506	7724.293	8497.225	6818.700	5461.369	7522.744	7214.889	5237.799	8438.661	7576.824	6498.962	5991.762	7528.957	4928.990	3373.228	7061.383	6747.326	6975.530	7261.822	9529.321
X603002827F1	7989.439	6758.661	7092.655	9054.372	6366.964	6437.905	6078.066	8253.033	7206.980	7743.866	5694.767	5897.967	8570.878	9283.131	7495.326	6590.846	8482.618	6222.495	6565.829	7079.539	6509.347	6154.705	6412.977	5455.753	7475.986	5975.620	6402.924	6492.078	7264.744	6510.461	6292.854	7699.039	8469.348	7576.174	7407.180	6450.916	6522.019	6614.826	8311.890
X603002829F1	3844.015	3568.890	5070.579	5156.716	2840.495	3825.660	3197.360	4880.313	2936.330	4104.191	4047.098	5257.311	4238.026	5228.332	3346.035	3455.346	4829.351	3000.324	3058.401	4004.961	3869.883	4429.413	6101.310	3403.757	3901.418	3476.971	3749.737	3496.822	6491.059	2729.758	3606.475	2820.357	7106.930	4642.452	2012.217	3335.448	3699.556	2627.037	4497.264
X603002830F1	13506.72	13666.80	15498.11	13680.11	14381.90	13627.91	14107.87	15964.69	16319.80	15142.86	14311.64	14490.86	13962.08	12079.12	12888.38	15193.13	15412.31	13995.68	13089.64	14818.58	14963.63	16686.55	15142.86	12801.12	14182.10	15285.86	15151.00	15730.60	13461.17	14377.53	14142.19	14094.53	13993.05	14256.28	14354.51	15919.52	17922.04	13302.72	17121.20
X603002831F1	714.4786	593.2713	377.8183	358.5797	1043.9559	702.4953	752.5222	385.0702	474.8021	476.0766	466.6464	891.0787	276.6065	619.1278	972.3252	685.1313	318.6955	648.3784	616.9122	927.6839	701.0289	718.4028	953.7985	498.2952	894.2459	285.5707	859.8156	626.3110	1514.7996	1042.3920	735.6368	988.7993	578.1434	460.7880	599.4784	927.7716	914.7658	429.0775	489.3150
X603002832F1	15516.874	14937.124	12644.363	17337.006	13664.177	15738.169	13842.718	14572.076	9388.826	16351.511	12572.097	14523.268	18537.769	12999.079	15234.710	17099.116	17028.118	14618.917	16004.297	12816.264	13926.600	13993.478	14442.804	13737.530	11895.642	12427.614	15538.128	11223.296	13251.053	11346.829	15248.789	17108.314	16562.370	15837.515	13010.583	13940.693	12274.275	14288.381	11210.424
X603002833F1	13075.973	14152.126	10412.069	9161.308	13582.948	16273.280	17067.031	10824.280	8979.142	11474.830	10665.157	14619.087	7289.617	16001.362	13935.304	14200.600	10485.454	15092.191	14579.284	20104.900	16857.040	14900.915	14104.734	15183.524	18151.932	11151.048	13510.298	14781.977	16445.302	11792.802	14918.185	12022.285	5969.074	9025.226	13256.858	9500.350	13945.848	9845.464	11678.714
X603002834F1	10421.697	8924.653	10543.275	11603.877	8734.931	10054.615	8223.551	10440.858	9329.010	10017.568	9492.751	8798.566	12567.507	11899.863	9182.746	7563.246	11533.537	8197.552	7312.546	8814.671	9230.139	8692.208	8918.737	9619.657	9678.803	9600.534	7557.103	8718.798	7130.010	8678.901	7797.252	9019.593	10940.543	11272.747	8227.551	8087.861	8196.525	8943.456	9693.083
X603002835F1	142.719136	273.241245	152.681698	196.459269	172.895330	173.909289	155.248977	370.019827	99.166871	178.471539	118.452955	213.376303	94.927311	8.455302	222.986749	166.069892	163.305536	266.764726	178.374150	158.547343	92.150499	181.018784	144.586081	344.388647	182.360214	205.446267	257.130120	111.724976	138.782812	219.080895	129.696890	171.543844	160.639642	369.956662	171.216030	193.103139	165.194361	139.951154	130.848159
X603002836F1	19.25718	81.54291	92.86589	45.88481	64.73266	155.22930	35.18308	37.34173	152.30033	27.74827	36.66568	86.37660	39.44311	121.13751	56.29087	86.64215	23.86074	96.88902	33.59891	93.63310	60.59001	36.03867	80.45556	62.94554	214.97577	110.33811	39.40068	110.59284	37.07107	57.86583	115.68145	57.39667	23.18529	10.16806	97.58515	43.08192	25.68228	29.24050	118.68714
X603002838F1	9270.429	12035.163	12916.060	8120.230	16214.736	13640.978	13613.346	8037.677	16108.612	7975.074	13050.928	17410.799	7361.859	8811.913	14444.534	11708.298	7634.042	12840.260	11876.024	15409.819	14400.633	19376.296	15433.946	10005.194	13692.312	15036.107	14760.457	12865.783	16839.001	24040.044	13495.807	12149.984	7359.966	6853.424	12733.711	14233.100	16653.908	13704.597	13616.689
X603002839F1	7684.772	9784.181	9473.510	7700.164	6204.072	8443.622	10101.044	7912.859	5983.223	8087.432	8995.964	6073.672	8114.791	7560.719	7344.747	7754.398	8477.877	9384.282	6015.586	5597.937	7128.646	6373.145	7490.937	10533.113	6558.429	7000.257	7095.173	6491.340	6531.577	6625.989	8102.116	5995.662	8837.006	9008.970	6185.793	7243.222	6917.649	6076.167	5398.660
X603002840F1	337.3132	512.5583	728.2252	551.5865	698.7630	833.5850	401.8582	532.5970	708.2890	338.4092	476.8320	598.6828	1012.8576	972.1535	599.1980	748.7135	577.7487	634.2607	638.1763	756.1208	493.6721	671.4971	806.5631	454.2491	654.1113	704.4380	468.5897	567.3312	465.1033	513.7090	713.7257	624.5462	488.4991	393.7107	856.3181	708.2579	689.4139	567.7284	685.1802
X603002841F1	3111.688	2995.544	4569.710	3474.470	4894.746	2374.373	3283.453	3596.947	4919.281	2481.153	2944.028	4433.523	3284.422	1741.347	5409.694	4339.546	2832.376	4077.568	5910.482	3517.326	7248.132	4884.694	4244.634	2642.564	2477.144	3763.905	3418.992	2860.696	3714.890	3130.466	3837.149	5156.580	3830.553	2714.787	4053.185	3805.740	4188.414	3315.227	4187.467
X603002842F1	103.65061	70.80646	38.61263	63.63840	57.10695	46.93530	47.75805	139.75618	56.47513	80.28204	32.38087	60.34716	68.54354	230.54578	63.41329	52.72289	79.31758	50.03531	61.08111	59.79918	48.81962	51.60437	57.72475	50.50714	58.36445	50.90105	45.05904	45.43029	56.65243	54.81746	63.96448	59.07554	248.81046	212.58136	62.51964	57.46691	59.35984	51.18127	59.78352
X603002843F1	6294.909	7262.261	8291.230	8613.322	6394.583	8115.341	7056.907	6640.793	5168.564	7455.154	11302.239	5435.992	9779.224	8347.532	5918.082	6911.809	7936.352	7899.624	5065.396	6280.733	7039.202	4478.619	5733.115	7251.481	6378.502	6808.472	5769.006	6089.243	4253.615	4803.931	6659.051	4460.417	7095.100	6918.942	6577.546	5425.115	5629.887	5211.532	6023.956
X603002844F1	528.4789	601.2672	566.6206	372.2220	486.9011	425.6490	574.4490	591.5142	4983.1305	533.9090	390.3064	1320.5743	244.3014	5227.5581	298.0209	400.9406	303.8847	273.2484	309.6268	1603.1611	1473.3768	540.7185	364.5037	713.8379	2716.9442	307.9083	176.1985	2202.6593	539.2172	1078.3860	304.4092	305.6246	223.6124	446.4468	897.8393	778.5448	518.2623	184.2018	1852.3814
X603002846F1	1581.0289	1382.4443	2026.5975	2172.0747	2778.2245	1248.4398	1601.9851	1735.9528	3130.1814	1524.7968	2410.3474	1718.5626	2111.9122	2518.4618	2079.4158	1648.8343	1359.5870	1395.8460	1627.4334	2240.3883	1919.6806	1854.3455	1634.5166	1125.9325	2036.2124	1498.2820	1331.9922	2492.0858	1692.8555	2303.4921	1389.5711	1759.0096	1477.8664	872.8842	2422.3220	1745.3238	2553.2837	2800.9989	2716.1305
X603002847F1	256.9021	488.9858	507.4021	374.3481	361.4568	419.3643	427.4218	384.2534	335.2840	390.8590	337.0050	362.0203	308.3634	247.8132	346.1717	449.4770	331.8810	353.9636	305.6484	293.8463	410.3997	370.0209	564.9781	524.9465	292.9092	408.9335	397.2417	386.1162	370.5053	320.8956	337.0439	418.8373	231.8817	224.8633	293.1433	471.3247	367.1757	382.8872	304.2305
X603002848F1	597.1932	472.6996	580.8153	586.7286	509.3145	361.5827	384.7067	472.4636	1066.3543	738.2673	508.8365	377.1467	840.2157	1098.3095	513.4056	450.7331	478.4085	377.1338	483.8762	519.3270	917.1931	419.8040	408.5460	394.2748	631.7309	545.9353	527.1616	777.4584	402.2207	544.0991	589.4683	509.0720	303.0838	189.6228	518.6986	474.9223	472.4291	520.4454	427.7566
X603002849F1	7206.300	8381.063	8292.481	9898.523	5867.989	7338.970	6432.294	9165.817	4632.966	7942.585	7473.888	5659.339	10305.998	9634.428	5648.447	6744.604	8754.637	6889.693	5016.684	6414.494	6528.377	4850.738	6688.084	7008.458	6580.156	6086.390	5427.335	6180.038	5270.201	5989.580	6224.724	5028.675	10878.615	9981.554	5824.167	6011.349	4884.901	4835.009	6011.005
X603002850F1	1683.8083	1207.3488	1083.1300	1757.6186	780.7818	1044.7733	740.9673	2349.4175	3263.6444	993.4136	676.4190	754.3997	3430.1647	1142.8710	727.2395	955.6490	2126.4930	684.8984	1250.5543	1460.8216	2082.0195	1102.9706	1051.4796	808.6043	1387.5027	1203.3601	834.0777	1376.5288	811.4506	3388.0236	754.6322	959.9001	2090.2627	1871.1613	769.2254	716.7928	1171.5277	1021.6467	1312.5028
X603002851F1	739.3435	1661.6975	2086.0827	1271.1262	1409.7713	1828.6545	1117.0447	1375.3615	2082.0482	417.5562	1404.3507	1346.8043	1723.8861	1077.8597	1547.1143	1277.5233	716.9736	1311.5403	1180.7476	1629.8911	1446.2538	1375.7311	2097.7995	1872.0795	1935.9723	1896.7619	1273.1706	1485.0325	1523.6107	1221.7333	1613.4784	1467.7861	941.0412	774.0239	1199.1357	1455.6838	1017.6075	1363.3977	1952.2912
X603002852F1	370.9628	474.4477	653.8821	482.3842	490.0930	588.6572	395.1681	415.5868	239.2016	393.0907	454.3115	457.0610	679.0767	392.2681	430.2030	486.7384	302.3043	677.3532	607.8470	388.8128	413.7664	478.9483	587.8160	548.1281	391.8778	386.8366	424.8665	335.7361	338.0002	324.3271	541.4691	417.7269	508.7204	263.3176	441.1558	441.5266	249.0481	404.5877	258.7940
X603002853F1	14633.950	14681.213	16019.810	17299.493	12924.595	13656.995	12728.173	18547.432	17002.479	17267.467	14876.820	14124.959	17460.874	14766.849	16336.067	11819.322	17079.869	13970.434	10706.642	11011.044	14474.513	15352.745	14278.993	16090.718	16850.519	15604.172	12683.815	13463.217	14419.665	13944.649	12911.544	14150.306	17561.501	17587.273	8421.874	13410.062	12140.504	12637.576	12138.719
X603002854F1	937.8537	1323.6558	1779.4367	972.1606	1277.5751	1316.9975	1153.3793	1416.1307	1482.9996	980.2698	939.0366	1748.2192	1595.0714	957.2164	1169.6509	1468.1992	903.9392	1396.7658	1965.4004	1643.8267	1425.1005	1918.1376	1408.9251	1256.1301	1416.3671	1304.0335	1457.9800	1684.2472	1471.9643	1878.5508	1235.4296	1597.5638	1295.6776	964.2602	1190.7523	1230.3246	1623.0561	1152.2951	1498.8511
X603002856F1	13843.055	12199.826	11212.185	14763.205	7056.649	9909.325	13146.352	15118.916	10562.654	14685.116	11795.600	9063.524	15499.664	12705.919	8958.497	9492.192	15440.296	11236.539	8442.662	9069.218	9863.982	10917.161	11092.495	14947.510	9261.074	11310.692	10112.463	9577.483	10811.143	8480.891	9920.604	11541.503	17004.719	14155.494	8179.663	10334.014	9579.552	6767.300	7793.867
X603002857F1	3185.612	3523.983	5230.533	3865.298	5673.992	5130.633	3144.198	3604.520	4434.647	3090.772	3025.039	4696.970	3905.969	4237.101	4523.301	4214.052	2405.766	3687.339	4194.172	5528.871	5142.682	5546.650	5226.905	3304.200	5017.494	4885.060	4124.510	4616.565	4602.571	4672.105	4613.629	4738.840	3122.811	2670.596	5059.796	5878.883	5606.366	5345.454	5253.173
X603002859F1	6438.0781	8208.5408	2426.4714	13444.7728	7966.4000	7928.7036	11693.6696	13510.7449	5562.5964	14638.7840	6589.0833	7467.4512	6504.6998	9282.3627	4505.8200	7680.7654	12106.1938	10197.6980	8231.5877	5187.5429	1512.3877	6587.0020	5936.9553	2710.4010	6695.5077	7042.8646	9957.9917	6187.3608	5844.9099	6222.8927	5777.3092	7059.3031	17315.8686	8737.1748	13343.7727	6907.1061	4989.6319	677.2201	7030.1203
X603002860F1	14807.01	18293.94	18427.83	13423.01	17529.28	18240.59	16648.18	13950.35	19378.50	16759.00	17113.37	16786.14	18588.98	22320.50	15801.16	16132.41	12932.35	19089.68	16982.55	19581.82	17490.42	16769.18	16553.22	15922.04	19096.47	17930.81	15325.57	18036.78	16327.86	16080.72	16315.74	18887.41	12185.28	13284.46	19387.77	17607.71	17242.60	16841.37	19504.81
X603002862F1	8278.973	7874.377	8701.718	8145.922	7737.929	8736.784	8825.523	7690.592	8247.753	9017.121	7778.208	7648.134	8017.730	7164.245	8317.648	8448.525	8994.600	7996.362	7803.620	8003.493	8492.227	8514.713	9461.964	8447.166	7078.788	8359.605	8534.393	7943.197	8093.567	7796.319	8468.929	8029.263	7472.717	7255.731	7342.142	7827.378	7913.487	8244.481	8709.495
X603002863F1	114.81111	314.31670	394.12399	196.08091	542.08447	199.83005	164.47901	265.58070	625.74513	154.11021	166.06578	321.28302	276.00171	50.62774	272.56215	271.37829	98.83361	379.21232	499.64379	364.97732	470.25746	418.05204	239.02977	96.49538	281.40183	540.62275	325.77113	698.32675	306.17699	NA	289.99521	372.53220	119.71925	45.98220	387.92655	307.83381	418.53361	246.65206	409.29318
X603002864F1	146.7799	354.4925	168.8466	391.3516	188.2535	216.7763	253.7733	381.3138	284.3348	192.3143	222.7004	293.3813	129.2344	102.7597	309.0220	383.2989	310.1356	434.8927	382.7520	163.0835	186.5686	226.7487	200.3849	316.8580	320.6587	364.2293	360.6478	256.1101	293.2122	276.3084	414.7462	440.2779	195.9350	184.2382	395.2395	240.2559	233.5466	362.7778	181.0988
X603002865F1	10060.817	11771.454	12332.564	9399.627	13085.058	11218.278	10130.107	8703.922	14217.869	9437.790	8595.868	10749.597	9828.992	11149.287	14909.466	11599.795	9442.979	10606.639	10088.830	12784.754	14135.764	13643.968	10949.638	12105.432	14496.793	12056.923	8844.706	13227.384	10664.121	11797.136	11400.870	10755.445	8362.729	7164.051	13689.070	13010.903	13335.973	13444.967	15106.269
X603002866F1	3441.674	4103.779	4802.529	3757.197	4631.194	4774.509	3912.599	2990.730	5585.674	3834.299	3241.572	3903.082	3455.107	2998.163	4519.376	4957.905	3975.695	4214.737	4927.398	5002.779	4494.381	5059.337	4983.324	3556.150	6191.562	4285.188	4235.079	4747.343	3945.463	4106.361	4893.816	4922.280	2439.152	2374.913	4893.738	4366.145	4423.495	4468.593	5603.958
X603002867F1	506.0553	1008.9446	1032.0967	552.2836	1509.7386	1003.9788	904.5470	470.5373	1192.6808	503.3508	842.1229	1040.3724	469.2608	508.3698	1222.1192	1407.0670	373.4300	1286.1471	1688.9188	1829.5271	1108.2049	1115.4243	1426.9383	654.0634	885.2516	1163.9472	1287.7132	992.9955	1281.0315	1148.4588	1144.4269	1072.6695	352.6105	326.2441	1839.0410	1276.0001	1832.6739	1318.8522	1952.0819
X603002868F1	463.3746	147.6215	193.0578	420.4260	234.0103	185.3202	154.0891	222.8830	726.8204	205.8910	263.7087	148.6995	341.2846	378.8617	223.2789	196.3134	239.5676	178.7868	264.4350	231.3733	NA	224.5544	203.5805	198.0750	216.3154	297.4649	209.9377	224.6875	188.3388	192.7862	181.3999	171.9707	325.1166	398.1758	257.5419	235.9200	236.2521	250.1541	241.6520
X603002869F1	2393.6207	1738.7625	1894.8478	2500.2786	994.9269	1065.8593	1208.3685	2860.8744	3491.2952	2609.5700	1083.8890	1403.4837	2783.9083	2213.7956	1349.3653	985.4564	2822.7846	1489.2258	1450.7723	1055.7813	1527.9553	1735.8289	974.7648	1364.2736	1363.1513	1533.9516	1282.5372	1186.5519	1271.4835	1992.5292	1204.8334	1322.3022	3520.7910	2944.2754	1274.2297	1252.6355	1805.4203	1240.2233	1553.2167
X603002871F1	917.4953	1005.4653	1809.6026	895.3900	637.0688	1495.4256	2123.6527	577.8644	345.8798	864.3650	2599.5720	654.9781	324.8150	533.0634	733.2327	895.7165	1267.5931	1772.5938	808.2428	552.5101	717.0548	350.3886	920.6628	2253.7171	607.9096	919.4519	1037.4555	679.0532	439.3609	520.4625	1032.4685	175.9345	296.2675	767.3963	598.8274	737.2601	396.4396	351.0411	368.1268
X603002872F1	9692.002	11542.171	11143.387	9759.456	11388.543	13640.063	10617.946	10312.903	12260.072	9432.004	12806.770	11425.550	10784.743	13899.138	11479.427	11786.926	9436.017	10527.281	9704.108	11418.626	12534.278	10762.304	12181.321	13002.538	11456.662	11298.573	10507.598	11456.961	10762.205	11114.337	11515.340	12328.240	9986.314	10538.977	12000.195	12394.612	10590.049	10422.733	11767.391
X603002873F1	7568.897	8223.469	7280.280	7077.637	7027.672	7093.120	7948.612	7291.610	5981.537	6879.070	8454.031	7120.850	7020.289	6735.207	6100.985	7803.002	6825.154	7414.874	7311.863	6640.035	7292.796	5532.203	6388.935	7577.401	7357.221	7392.498	7262.283	7457.759	6882.820	7534.152	7207.625	7317.807	8439.519	7176.809	7465.448	7409.165	6408.017	6903.445	6606.277
X603002874F1	248.1071	605.8214	873.0807	807.8788	778.6831	712.9450	463.7737	673.9801	567.8551	328.4335	820.1431	667.8371	1309.3140	584.4750	580.8481	600.7075	488.0241	476.4002	359.4630	821.1812	657.7848	784.4454	786.3397	386.0952	819.2583	694.0975	504.9216	868.7369	689.8726	555.7810	690.9229	639.7029	387.0378	149.9091	548.5033	632.8257	711.7361	766.9943	684.2625
X603002876F1	31412.53	24940.08	24628.05	28735.82	21214.32	26973.55	26955.76	31914.87	21897.59	29324.91	25391.80	26919.20	33711.62	31039.00	20818.59	20891.84	29968.34	24095.32	26645.10	23811.41	22059.50	20182.52	24198.20	29155.26	23943.18	25882.00	25652.98	22979.91	23572.16	27796.79	22870.43	24677.28	34423.49	33810.36	22837.48	25770.94	21131.16	21850.97	21942.65
X603002877F1	15761.93	23395.16	24662.97	15745.36	21728.83	23892.31	23018.16	12739.30	22731.91	15073.52	32435.42	19800.61	14154.29	17350.49	19980.22	22505.28	14647.74	23337.54	19915.50	22840.20	24283.60	26067.32	20506.29	19854.40	23505.34	21131.52	18561.43	21678.78	24022.57	20990.01	20826.40	25611.89	11509.99	13473.54	22900.52	20877.02	28405.88	20507.26	21215.49
X603002878F1	7470.752	6939.681	8697.825	5624.706	5969.945	7451.299	8718.049	8256.984	5693.323	8723.576	8171.752	7948.043	7705.223	6079.379	7097.515	7740.135	7264.912	8523.691	6023.213	5342.361	6514.215	6057.105	8332.240	8084.565	6290.595	7647.435	7328.320	5866.783	6942.414	5504.656	7328.320	6461.470	9676.164	9085.270	5333.890	6873.061	7176.014	5222.036	6183.266
X603002879F1	205.8671	401.9627	526.5421	571.7120	466.8011	365.1163	270.5577	679.0300	566.9631	233.8667	314.7663	428.7753	649.4424	157.2529	596.1154	524.7026	466.4285	586.0703	428.2975	504.3811	548.7115	577.0727	451.3665	376.2807	697.6054	565.7234	493.1546	524.8053	407.3827	317.6263	511.6342	602.8016	194.8441	112.8943	411.3778	455.1843	476.6279	461.1921	345.8365
X603002880F1	120.76306	339.39539	453.49684	283.29371	372.91054	353.74438	280.51710	372.42391	323.43840	122.76565	348.45384	390.61276	531.22303	230.93535	296.35436	369.63198	143.79250	403.79789	379.34601	363.56859	317.19024	330.04011	458.22285	334.60891	407.68237	405.51397	335.86183	377.31921	321.07173	343.89586	378.37559	390.05469	220.43445	93.96016	332.02177	340.43867	317.55250	339.13732	364.12780
X603002881F1	13706.39	14026.39	10985.21	13232.54	12401.46	13222.43	13634.77	11613.58	10122.08	14124.59	11477.73	12454.82	11791.42	15188.18	13412.74	12399.21	13179.88	12749.29	10114.69	12145.26	11794.29	12821.97	11891.73	14798.12	12147.81	10046.26	13409.45	12526.48	12864.07	14843.19	12710.97	12806.81	13853.98	13712.02	10893.51	13373.42	11008.36	12698.91	10091.66
X603002882F1	489.2748	147.0649	104.8974	246.7632	210.0525	153.9766	124.3188	265.9070	145.3804	282.6760	140.6142	169.5310	332.9348	483.0304	217.5941	170.0732	184.0295	146.1704	195.7963	179.9565	161.6579	170.7891	156.9406	154.5462	144.0762	112.5434	207.0028	166.0924	240.5215	161.8798	170.0054	201.0001	383.2260	735.9082	164.4341	207.0507	212.0760	217.0284	172.9329
X603002884F1	14715.20	14820.34	16778.08	12415.80	18294.39	17619.29	12928.89	13250.69	17703.99	14357.48	16434.44	20345.20	14392.48	13489.13	21672.76	16972.20	11116.02	16495.01	16816.07	16050.16	17358.75	22073.79	20845.36	15187.22	15837.82	16508.46	16348.85	15148.03	16855.25	12885.59	15307.95	18747.53	13646.77	12964.75	16630.27	19070.93	24010.69	16721.33	16927.81
X603002885F1	5199.268	6237.923	4683.580	5733.795	6809.856	6749.419	4566.604	5284.805	4621.370	5930.268	5998.294	6136.687	6231.332	7651.629	5170.383	7231.433	4448.808	5336.747	4637.411	6197.563	6815.502	4643.572	5757.439	4405.517	4846.603	4028.539	4953.671	6796.559	5709.056	5513.172	6204.438	6603.021	5871.825	5814.847	5603.726	6292.065	5089.399	5989.536	4951.176
X603002886F1	562.3076	676.9714	1118.7893	964.9562	654.0366	985.6824	411.9707	1021.1334	791.9101	777.2554	700.0101	544.4342	1436.7707	1039.8075	598.7201	785.4413	890.1730	554.1547	568.3042	830.3627	574.7021	561.5623	759.1896	704.7730	744.3959	833.9064	506.6013	789.6117	432.8308	494.2678	715.3660	582.1704	962.4720	500.4611	768.8197	746.4769	586.1225	518.0501	675.1442
X603002887F1	2400.4697	2776.0724	1265.8515	4569.0248	2328.5368	2124.7025	2353.4306	4417.9475	1780.6227	5908.0668	5321.2180	2794.4564	4818.2793	4300.1705	1643.9054	1365.2074	4501.5908	902.1846	379.1545	1100.6002	1889.9520	2019.7325	2803.5479	3290.1271	1286.2297	2202.4192	2656.1277	2262.3824	2906.9467	1732.7848	2424.9395	2289.1953	5120.2868	4386.3580	797.5264	2332.2797	2056.5067	2950.4917	2006.2981
X603002888F1	702.2906	503.1240	858.5980	1373.5528	755.1055	531.1312	361.9135	1221.4088	897.7728	830.3823	731.9391	568.2843	1764.6087	479.1444	916.8116	611.0334	1074.2587	492.0728	615.1559	844.8854	652.2876	917.0056	745.1961	359.9570	693.7721	666.1255	520.9665	662.2851	599.8683	469.9706	776.4267	910.7644	1268.7842	554.2444	654.0232	864.7905	709.4917	836.6758	674.4455
X603002889F1	631.3441	463.3230	528.5220	1677.7336	737.4286	538.9430	196.6753	1112.7028	424.8836	798.7672	451.8126	464.6833	2050.6704	2022.6786	452.2832	566.2882	906.6915	365.2217	385.3730	538.2573	362.5008	407.9050	476.5039	352.1996	480.2432	472.3033	335.1759	472.9431	277.7144	438.2007	468.8561	409.7978	916.9399	439.3492	689.9304	431.9967	350.7444	682.4581	579.7093
X603002890F1	21463.35	18142.15	18890.36	20203.39	13972.08	17377.77	18860.92	19971.85	13199.53	22902.35	16169.06	13671.24	23415.26	18798.36	15421.03	17493.17	22733.82	19105.84	16236.82	14876.16	12845.87	13342.11	16473.58	19775.44	14896.76	17714.30	16834.75	15860.26	13900.03	11698.10	17319.21	12357.82	23764.94	23252.34	16221.43	12995.07	11675.35	12374.30	13042.46
X603002891F1	2717.4542	1302.9773	8643.8622	1029.4396	1625.5565	1093.1143	9320.0823	3689.3177	20582.3210	2920.8275	40503.3483	9714.6384	1113.1521	6694.4174	1109.9218	880.6438	2368.9882	2358.8818	9383.8135	8129.9329	12553.6532	3806.2428	2498.9172	2120.7754	9427.8669	6371.0639	2468.9369	14646.9284	6223.3768	7840.1091	1273.6842	2814.3840	1168.7758	1405.1652	948.0100	1177.2251	12349.7485	2477.5440	8161.8171
X603002892F1	6786.501	6063.202	6613.883	6691.652	4557.489	5017.921	5387.082	6210.268	5013.954	6429.159	4411.366	5126.681	6468.988	4391.523	6051.950	6231.857	7152.990	5746.306	5836.611	5420.652	5638.219	6140.181	5328.361	4974.828	5237.733	5593.750	5205.256	5401.180	6294.057	4476.882	5529.848	5181.306	7545.424	6186.738	5005.603	5122.910	5934.479	5552.292	5594.511
X603002893F1	23912.52	25809.99	25863.15	26412.71	27296.36	24435.16	23342.52	22717.44	26080.28	24050.69	23823.86	26941.78	27027.02	26365.76	24601.05	25537.72	22585.92	24089.65	24350.03	24122.64	24610.64	26078.88	23301.73	22921.29	27511.63	25327.43	23710.59	25594.80	23868.77	25862.37	25426.28	27788.76	22248.93	22999.22	27178.34	26218.03	28606.72	28452.89	29030.30
X603002894F1	1608.108	1706.256	2685.024	1994.281	1690.286	2046.709	1726.396	1885.897	2194.977	1504.932	1998.607	1711.856	2671.413	2235.300	1971.343	1527.756	1687.067	1413.812	1312.186	1810.577	1774.886	1673.435	2043.224	1936.968	2757.746	2184.496	1558.531	1976.649	1896.335	1849.848	1636.397	1959.047	2143.809	1806.415	1190.871	1698.295	1489.860	1622.283	2300.518
X603002896F1	6288.297	8500.109	9525.646	6413.489	9166.924	7743.236	8650.866	6185.363	8679.840	6463.050	7280.088	7345.997	5853.440	7308.804	8508.687	9448.960	6002.018	8427.734	10434.962	9401.663	9297.058	8627.624	8749.599	7426.082	9560.168	8791.165	8674.381	9603.854	7741.130	8103.066	8462.498	7954.116	5453.031	5147.006	8726.201	8570.804	9543.725	8843.396	9777.050
X603141501F1	4500.613	4262.156	4181.505	4077.902	4106.177	4843.010	3855.154	4667.277	5271.338	5154.374	4224.686	4204.028	6507.354	7329.653	3829.531	4288.451	4729.358	3726.218	3470.236	4379.861	3787.452	4045.676	4046.307	4199.726	3907.478	4098.273	3726.505	3533.604	3107.709	3270.066	4327.967	3857.367	5010.356	4593.916	4235.038	4036.994	4164.644	3571.415	4615.166
X603141502F1	268.2097	440.4197	582.9113	415.4572	339.7760	404.4482	825.8306	544.1857	526.0529	314.6185	518.6142	379.6559	749.0884	909.1881	390.4659	378.3500	445.1698	330.7419	415.5152	459.9954	620.4850	379.8190	460.0623	370.3443	631.6520	406.1583	328.0146	534.0558	437.6838	459.8811	312.2974	367.9853	342.8768	199.7154	331.9153	415.2241	489.1101	391.0014	533.0351
X603141503F1	86.62896	410.53435	346.85749	126.89038	182.91094	488.65775	216.11524	157.98018	143.71068	75.83699	357.26078	258.65430	224.34159	35.00086	274.89242	301.72430	139.74167	670.61280	755.23925	206.83814	238.02908	149.17719	307.65248	442.51180	186.43616	359.14977	457.15529	118.25941	325.34701	164.66507	422.92536	259.58086	111.72514	99.88576	413.08076	204.17469	214.40517	180.37074	248.53704
X603141504F1	11857.292	13244.307	11268.427	9848.615	13459.713	13413.893	12653.745	11035.699	13199.399	10829.182	13489.919	14634.290	10202.747	9295.126	11961.687	12397.466	9643.010	13502.827	13365.382	12803.522	11041.713	14533.363	14191.476	13568.326	13272.934	13751.572	14485.958	12795.091	12919.626	16074.212	12572.800	13516.613	11602.594	13868.449	11607.598	15414.419	14822.560	14195.325	12656.863
X603141505F1	5784.004	5811.949	7269.819	6745.467	7028.947	6351.264	5341.101	6669.538	6846.079	5379.430	5965.133	6888.843	7436.171	5114.918	7228.890	6413.676	5933.645	6442.772	7066.633	6966.561	6485.973	7025.023	7375.917	5084.183	7296.746	7522.006	5805.086	6597.388	7665.374	6647.124	6146.363	8127.788	6276.085	4949.829	6785.806	6041.038	5867.263	7010.363	7835.296
X603141506F1	2056.414	2146.139	2615.068	3111.124	1885.591	2677.347	1477.046	3506.940	1729.034	2421.808	2272.602	1788.619	4441.030	2707.654	1963.302	1902.753	2814.888	1756.550	1597.602	1862.863	1862.024	1891.504	2184.485	2187.475	1997.299	2134.598	1555.724	1959.133	1594.079	1642.527	2178.956	1876.786	3895.524	2260.293	1904.857	1961.002	1729.631	1931.848	2142.349
X603141507F1	6353.797	8042.895	9263.850	7866.160	6690.064	7487.132	6529.216	6640.895	6414.829	6393.487	7782.441	6865.657	7475.757	3179.638	6513.415	8213.458	7327.915	7570.344	7659.164	7905.029	6860.727	6790.881	8540.202	6823.671	9265.808	8524.400	7303.460	7002.576	6529.841	6732.743	7617.693	7041.723	6729.822	5973.927	6495.005	7785.397	6273.173	6827.070	7165.137
X603141508F1	9790.870	14177.968	13474.553	9104.544	16726.479	14803.993	14867.509	7648.186	13763.068	8399.470	11090.570	13778.845	7231.640	8886.512	12591.098	17478.209	9145.770	15300.508	12756.149	15176.343	13714.592	14579.183	18563.536	11318.279	15725.056	14520.792	13826.157	11910.050	14041.128	12256.860	16375.262	16832.462	5908.870	7196.644	15086.842	15803.472	17308.338	15854.350	15191.687
X603141509F1	17697.27	18003.66	18914.10	20627.40	19037.88	17373.17	14769.86	18158.95	19275.54	15942.73	15827.44	17112.34	20702.67	17768.91	18598.61	16962.87	19644.12	16217.34	14335.98	18414.25	18885.39	17982.55	16463.28	16073.57	16144.91	18522.67	15722.07	17956.38	16916.28	18312.70	17771.80	17384.39	19779.51	18109.10	18584.58	19059.90	18038.31	20281.24	16523.29
X603141511F1	749.2389	760.2180	905.5007	666.0093	901.4440	833.4366	804.2991	552.4030	1278.5222	494.4803	732.8970	819.8246	612.3296	1011.8347	944.2064	929.8745	602.0500	1154.4962	987.8970	1099.1314	1228.9934	1039.3185	783.4785	736.9755	969.5805	936.2172	824.0436	947.7717	904.8769	655.7988	788.5896	978.8093	572.8721	615.1122	1062.1405	1171.3384	1231.9448	905.8069	1163.7089
X603141513F1	298.55651	576.03697	448.19073	229.18156	377.12839	333.66780	391.27652	351.20467	3316.14051	57.54600	389.94266	303.84079	270.21716	247.38826	267.00334	344.63727	167.33983	297.23071	786.58458	644.10078	3163.17907	880.11837	430.87200	461.37590	704.90021	817.04481	486.83814	705.56460	511.18810	710.98355	192.67180	568.13317	41.66434	155.30478	196.19082	236.74915	740.77336	446.58746	794.37976
X603141514F1	473.5715	495.5863	527.1215	757.7434	254.6011	262.7885	631.5088	955.0318	3026.2042	541.4572	193.2838	663.5156	380.9662	4997.4585	160.7082	274.7598	313.3032	361.3217	513.8819	1307.9328	2165.6770	247.2964	371.9712	940.5218	1385.0186	328.7603	185.3159	1742.8815	718.6159	1757.4163	458.9099	334.5315	283.7950	182.3167	628.1192	582.7829	389.8718	358.0780	1037.4913
X603141515F1	511.71397	693.11944	505.04364	595.14661	369.88697	533.93247	387.60600	1045.92933	256.87842	1065.28684	454.08734	628.56635	778.40680	92.06102	597.07816	483.11160	846.86778	539.31058	737.58278	433.24207	519.65374	708.47717	611.51876	293.05426	404.50304	829.46281	640.01109	335.51545	419.98409	207.05178	560.37159	498.12224	1211.50631	347.07230	370.95624	383.69089	625.37888	326.88803	579.22343
X603141516F1	658.7775	759.9725	640.4222	1274.8764	496.7752	1136.0789	424.8608	1155.3766	384.9465	606.0151	929.2679	541.4197	1494.6095	NA	579.7064	571.2839	1074.9228	466.8708	372.6285	558.9123	471.2919	450.1860	841.1751	983.4190	557.7883	563.9462	505.4292	532.2472	535.3463	614.7555	538.4969	587.6695	1356.5983	822.2053	418.2708	399.7239	345.9496	677.4607	406.5948
X603141517F1	379.71796	149.49374	111.78980	255.38629	164.52804	121.87240	145.59843	169.21431	NA	848.66142	271.19867	103.16992	318.04702	503.37549	243.50634	126.27881	758.42190	197.74704	177.60006	169.41701	1029.17509	96.50197	179.98269	85.44649	102.29896	1752.66577	100.22088	209.18751	138.34699	214.15924	194.48386	123.17420	309.51838	245.45377	200.50906	365.41390	406.03403	190.25504	97.50003
X603141518F1	1068.9095	1742.8943	1867.9438	1162.3536	1225.1453	1184.4689	1786.6711	885.1271	1265.5402	1061.7862	1374.3658	1316.0944	645.8010	282.8646	1646.6447	1304.2148	1003.9107	1531.3486	1454.0135	935.7111	1241.2941	1635.7062	1200.8036	1311.2037	1352.7255	1594.5163	1542.0359	1290.9657	1828.6643	1500.1010	1303.9877	1550.6904	1135.0938	669.0870	1649.8510	1260.1171	1398.6675	1586.2840	1487.8023
X603141520F1	2108.212	2568.008	3096.195	3505.533	2136.200	1871.330	1805.071	2952.291	2618.625	2979.716	2141.000	2631.182	3451.744	1668.432	3920.616	2302.000	3154.110	2952.161	2904.000	3491.627	1888.087	3413.231	2259.467	1602.180	2594.130	3437.347	1745.930	1847.989	2698.576	1403.260	2269.684	2264.124	3960.211	1841.154	2565.981	2179.181	2248.966	2583.026	2273.156
X603141521F1	175.83644	375.60050	272.38825	887.67451	1941.80349	337.88416	195.05575	107.93361	2053.08150	92.11775	303.34348	282.89896	833.50594	92.43140	677.97545	581.97959	130.33103	322.16129	917.80393	609.42019	4323.68956	454.67997	568.06412	268.32054	444.26002	1344.70423	382.03671	487.07670	382.52012	4445.59267	438.73856	401.32353	81.17323	109.50999	1054.65133	505.90694	776.83597	1238.44604	820.85072
X603141522F1	208.77875	406.87438	656.33709	221.01391	421.68335	613.15249	612.34529	617.16296	1984.19907	219.65906	2360.37473	724.14594	492.29157	227.89911	761.04391	516.67123	214.07477	485.08851	456.62354	583.91723	661.98504	661.17322	572.27170	303.89698	836.74505	714.52649	676.23375	2002.11302	592.90147	423.03415	667.35032	472.45455	192.01810	53.56283	418.34522	693.03199	1322.40413	539.75429	597.83656
X603141523F1	48.95151	199.75211	115.24874	61.02250	87.88731	127.57810	89.00829	96.54805	215.34238	58.71919	107.52446	92.92646	30.81197	24.94387	120.50888	122.39946	52.57258	226.68223	137.25787	92.07232	113.32679	110.36624	104.18175	120.45396	158.95526	237.29482	161.00814	106.30199	150.35020	112.84342	153.94886	135.55650	38.06079	27.24652	160.07258	75.31067	129.70117	100.78657	135.50350
X603141524F1	4970.005	7064.870	9350.275	4935.944	7272.586	8408.906	6752.032	7156.645	7733.892	4762.019	6312.687	7902.919	5259.018	4779.569	6987.559	7985.567	4742.985	9599.702	7407.040	8219.522	5911.629	7272.292	7048.275	7158.921	6184.584	7810.869	7708.924	7011.858	5671.222	8375.237	6986.946	6596.210	6366.794	4611.105	9047.194	8785.432	8627.568	8820.031	8933.357
X603141525F1	907.16456	138.19458	341.54203	748.41754	160.08321	276.62548	365.21717	536.13789	123.11801	1062.06750	401.64017	156.74305	398.61593	483.79661	151.28176	201.03474	989.17950	275.04874	235.29029	181.42081	196.42818	98.75124	174.63287	384.10811	179.23878	268.89372	258.80367	189.42987	95.45000	125.02082	234.68788	124.73271	508.84098	636.34060	175.74960	167.75402	142.49358	111.91417	140.59329
X603141527F1	387.4706633	214.4429284	1005.0117542	275.8552343	317.5820375	233.2418332	349.4326863	3121.3998724	1285.8202900	296.6133666	466.7478495	216.8393367	1890.8152732	299.5870068	0.8663182	74.0147347	297.1649612	531.7580371	230.0929193	245.7386297	1745.0590807	1328.1594559	94.6033593	17.0573805	350.8784727	2052.4724196	855.1785735	1151.8010119	471.9120847	1209.2275100	86.4044704	379.3198114	267.7928729	315.5424960	174.6380509	260.4037668	1126.2205916	350.1565587	1966.7421575
X603141528F1	5265.664	4549.287	5354.023	5347.453	3310.957	4607.343	4915.530	5790.668	3274.194	5676.532	5760.276	3921.260	6390.353	6535.938	3635.157	3924.877	4616.320	4526.644	2864.766	3374.753	3943.131	3686.565	4466.852	3365.941	3938.721	3815.399	3493.898	3913.321	3724.746	3814.718	3984.470	3294.763	5575.858	5894.599	3414.353	4063.063	3840.706	3492.164	3659.285
X603141529F1	382.99015	672.58200	1167.63227	538.83591	757.99849	717.75875	848.89877	564.86132	3379.12976	259.67340	1401.42022	837.42821	345.02185	159.76722	596.96297	880.40772	380.47680	551.18072	1028.85177	1010.78498	1840.01283	1371.89433	1022.80666	557.05953	979.79957	1332.10944	880.65687	1529.96111	1018.23948	1765.63497	536.75245	733.86120	179.20718	-11.70431	774.69730	674.31314	1263.86530	789.70018	1325.86644
X603141530F1	1615.2747	1156.0838	1261.0074	1546.4306	1219.1489	1438.3748	950.8190	1612.6124	1128.1570	1223.1761	1131.4190	1154.4780	1967.6830	1587.0102	1391.0597	1331.1175	1461.6934	1168.8653	1091.6660	1317.0601	1432.1090	1187.6773	1543.8786	1387.0576	1493.4953	901.2684	1071.0917	1587.5747	1152.7592	1110.4856	1323.9817	1334.1461	1344.6551	1809.4389	1324.4165	1455.8577	1244.1101	1193.0918	1058.5553
X603141531F1	1783.2688	779.3786	1139.7920	1627.2644	626.9591	667.9231	532.3197	2132.4794	2994.4239	1723.5841	598.6258	1203.5237	2499.4217	561.7153	916.9123	505.1346	1659.6599	741.0201	1107.4415	739.6582	3918.6020	1092.8764	1078.1553	627.3069	886.1024	1166.7727	799.9692	787.5198	1062.1014	1807.4031	747.9215	760.7867	3026.0437	1346.1626	607.0143	920.1602	864.0559	570.4509	706.2685
X603141532F1	340.61291	107.59797	122.78039	201.07117	132.69376	115.75075	115.18951	104.41666	111.16995	334.84687	122.41489	152.26815	297.44189	285.45462	169.33006	108.62170	196.71501	94.60602	120.74222	128.07478	122.22532	134.83751	141.88293	126.13294	100.25050	82.76653	131.52887	107.18983	143.11271	119.21911	94.30193	134.95380	157.02862	222.69124	91.16069	167.09179	154.69977	163.15113	137.78108
X603141533F1	5486.321	6568.470	7830.352	5086.382	8286.772	6032.476	7414.058	4181.038	10593.790	5279.585	7239.931	7932.030	3895.929	5522.409	8360.558	7089.857	4503.904	7308.135	8222.944	9489.606	7491.831	9511.944	9067.692	5416.409	8363.947	6647.579	7274.240	7876.212	9431.091	7957.096	7450.729	8597.621	3479.823	3231.345	8778.717	8155.307	10441.104	8322.691	10484.458
X603141534F1	405.5668	1668.5984	1961.5514	749.2953	997.1357	1696.8754	1745.2596	541.5343	802.9847	346.7248	1924.8953	1012.8436	320.6283	193.1113	1197.5765	1460.2337	458.2554	1795.8471	1243.3549	926.6956	1040.9260	953.0473	1511.7429	1977.8888	943.6794	1317.4554	1397.6901	1164.7188	575.4769	685.5067	1345.8772	636.8162	286.6896	616.7842	979.9126	1132.4238	1047.2868	901.5349	880.2515
X603141535F1	370.87714	727.59675	773.38370	558.52630	390.77294	543.37515	382.84739	707.49004	426.09364	532.11503	283.97838	330.72284	737.95234	80.40041	734.55348	598.05918	139.46616	413.36360	665.61278	499.37977	503.02852	640.71335	683.18613	416.39003	697.87108	587.96704	640.79413	739.86016	799.01365	473.01285	651.35790	411.57700	250.71104	359.15121	572.81549	754.10357	583.76849	548.43849	608.14569
X603141536F1	6998.358	7408.098	6841.362	7557.499	4007.884	6601.522	7357.917	7185.833	2959.664	8724.905	6494.924	4049.358	9782.254	8541.806	3945.786	4920.119	8406.757	5616.374	4298.783	4191.583	4455.702	4522.435	4968.187	8007.774	4568.303	4968.984	4560.982	4504.079	4161.219	3579.493	3858.223	3713.725	9374.075	8284.966	4032.078	4588.197	4681.332	4335.149	4608.084
X603141537F1	93.85784	182.92347	158.88649	114.98518	174.93721	204.88783	226.98125	173.56249	123.37055	101.74949	206.57571	166.39837	124.66370	304.16177	186.09348	187.12112	156.38406	181.23406	186.92771	175.33772	157.21582	161.28637	199.75617	176.47278	120.67511	127.34846	155.20776	135.07224	169.77881	159.70306	164.69413	217.16044	256.08653	277.20237	144.98696	188.86680	173.83647	146.76697	171.56810
X603141538F1	3914.379	3151.107	4190.369	4497.176	3045.043	3348.075	2731.254	4868.844	3303.608	4199.927	4129.247	3353.693	6278.604	3138.235	3026.776	3389.446	5022.819	3285.159	3085.728	3592.040	3049.322	3111.968	3278.498	2868.739	3508.082	3663.241	3052.293	3504.796	2810.491	2759.384	3460.176	3057.083	5208.632	4141.150	3437.908	3467.774	3273.963	2866.859	3723.944
X603141540F1	101.69453	1191.64327	1603.64901	233.75301	509.90400	989.35615	586.60409	848.72911	343.56855	867.53976	1252.73149	264.98533	39.56818	120.20073	157.52084	559.26560	1059.87061	1718.71604	279.31433	602.20774	667.65375	191.11306	437.65205	829.50045	588.33450	752.72611	408.38877	1372.02002	397.78257	142.80146	1037.96333	287.56749	526.75776	262.39068	573.71133	503.50527	426.25487	116.06052	120.99170
X603141541F1	278.3716	528.4973	454.9208	205.9396	216.2041	390.8218	285.5023	307.9337	180.3685	130.5538	324.1848	213.4086	318.7530	338.7114	170.6035	301.5822	259.8463	259.2540	328.6217	321.2339	295.1754	349.3049	281.4971	512.5449	394.1771	435.1726	349.9265	272.7921	226.1813	239.0331	205.6917	226.7878	344.5222	394.4263	136.2490	168.9245	224.3173	201.4878	311.9971
X603141542F1	8.544818	8.084567	20.612585	8.502671	12.479126	8.567459	10.021011	12.731196	8.947827	9.037887	9.452214	8.554043	13.021951	8.475155	9.599184	8.523348	9.617161	7.830763	9.903547	11.380802	NA	7.593335	10.849721	9.097555	12.304408	9.945238	8.744138	8.371406	8.490455	8.325412	7.943405	8.117723	10.770642	8.632261	10.240039	10.232772	9.782586	8.915779	9.221671
X603141543F1	4530.696	9144.093	11140.307	4859.172	9879.256	6458.280	10038.028	5104.209	10757.254	4780.245	8287.900	8276.062	3865.939	8141.569	10019.591	10213.850	2908.665	10658.479	12947.848	9025.140	13290.947	11828.343	10067.194	12004.935	12266.917	9968.724	10731.397	10066.304	9462.454	6766.942	9567.960	7757.489	3990.331	3486.968	10559.206	10513.056	9580.856	8110.017	9855.904
X603141544F1	10857.979	13423.399	14602.759	9357.342	10888.479	13707.634	15819.729	9843.497	9693.063	11252.552	15182.711	10857.567	9735.069	11597.311	12836.518	12818.662	10144.685	14183.983	7914.248	8437.731	10762.404	10510.361	11268.622	13791.263	9926.316	12986.653	11464.044	12355.738	11713.266	11747.484	13147.494	9924.116	10955.516	13576.353	11035.405	11141.937	9471.173	8847.613	8102.468
X603141545F1	4717.980	5787.833	6089.938	4352.807	5876.882	4783.392	5303.872	4587.870	5199.728	5493.106	4887.401	5159.050	3587.752	4605.289	6808.857	5405.680	4834.940	5190.360	7068.279	5922.147	6988.746	7140.512	5665.003	4138.670	6739.137	6441.588	5847.075	5740.666	6118.979	7130.673	5542.947	6158.378	3172.698	3474.118	4913.524	5757.604	7787.108	5759.144	6708.506
X603141546F1	5562.540	5408.181	2110.772	3893.013	3895.496	5442.934	6707.946	3943.875	1490.611	6113.765	3438.897	4504.186	3129.473	4133.507	5626.558	4801.157	7144.971	5343.043	3528.160	2992.338	5160.937	1707.694	4595.691	6462.767	2254.890	1963.373	6231.871	2738.872	5436.777	4472.024	5653.583	3845.625	6243.238	6604.297	3225.345	2830.763	1776.478	3599.035	1758.111
X603141547F1	23.83604	51.52445	24.66911	29.86282	20.78938	27.68352	48.36473	41.64568	114.11265	25.55747	20.42102	28.70057	40.32472	11.36739	27.11498	34.39490	33.46626	87.16717	65.76475	15.51139	53.75602	20.92558	32.65029	30.05752	105.57865	57.80699	62.80440	35.80070	37.55170	36.97899	49.00895	28.46576	21.64977	10.14994	39.33147	37.02556	25.35690	29.80079	26.73474
X603141548F1	19432.68	20524.24	17849.82	20455.26	16926.60	18629.12	18811.35	21671.12	17046.20	18356.90	16293.74	17526.98	19658.64	18158.27	18603.53	18750.98	20258.11	20074.58	17562.73	16476.89	19346.92	19100.25	15520.71	20789.58	18673.20	18882.16	19431.07	17064.82	17209.83	19327.82	19140.42	19183.30	21114.61	18962.66	18572.20	16016.82	18817.64	19977.95	16328.71
X603141549F1	1499.0613	2258.8632	1903.7702	1495.4155	2627.0753	1695.2128	2409.5805	2162.6160	4245.6213	1905.1942	1788.1650	3021.5645	1786.9811	1891.2858	3148.7564	2032.6013	1083.3256	1960.9064	1844.0074	2162.1818	2877.0895	4015.8105	2796.2137	1376.9385	2091.9701	2484.8168	4796.6026	2774.8051	2597.8892	2318.2417	2635.1088	2955.7077	1925.8423	854.5669	1467.5239	3585.2979	4261.4381	2802.5397	1855.8788
X603141550F1	12196.977	6187.148	7166.164	11030.996	6808.771	7635.997	7051.105	10598.327	7116.174	11962.722	6567.130	8395.514	12081.772	9058.591	6051.588	6965.968	12503.659	7223.259	6668.488	7265.913	5728.720	6817.402	8284.979	7241.363	6913.727	7790.449	8756.889	7411.108	5964.091	8043.656	6562.701	6127.928	12873.878	9251.915	6347.790	7794.352	7194.501	6562.960	5563.773
X603141552F1	3371.685	2556.571	2539.129	3473.849	1670.745	2897.838	1884.569	2427.740	1614.367	3602.988	2337.499	2154.130	3593.866	2204.863	2417.245	2451.044	2673.788	2770.199	1642.890	1547.036	1717.085	1826.021	3019.136	2632.471	1653.516	1831.649	2113.132	1781.198	1414.873	1254.280	2874.148	1413.074	4162.495	4356.308	1681.785	2267.340	1708.162	1644.159	1745.313
X603141553F1	144.31782	471.93701	530.31620	251.72280	782.86889	334.78086	292.95136	207.14874	835.67987	44.07849	561.61365	307.88320	257.60792	151.03539	281.95459	613.77860	53.65650	469.96454	262.93623	493.51658	590.50828	375.04293	254.42130	254.24605	404.36099	628.68266	352.04466	547.72280	427.62871	428.58159	281.79139	181.16632	80.32932	95.80718	533.25984	470.22724	333.35045	478.96526	790.55622
X603141554F1	7819.909	7067.335	8069.077	8433.437	7214.515	7066.511	5913.031	8663.790	7271.896	7603.743	6351.405	7056.023	9607.810	7931.468	6241.072	6738.728	8684.045	7105.075	6892.214	6942.766	7099.907	6554.073	7351.398	7298.950	7120.993	6028.213	6312.322	6035.328	5842.662	6960.475	6320.369	6889.252	9180.927	7122.788	6363.391	6925.324	7099.907	6474.459	7645.495
X603141555F1	3405.406	2860.432	3220.098	3549.772	3211.415	3858.718	2209.061	3780.552	3100.876	3793.292	2943.734	3127.837	5012.410	3750.117	2608.992	2822.963	3992.490	2742.191	3155.869	2855.525	2783.198	3086.987	3230.891	2950.430	3354.968	3029.701	2776.639	2955.994	2421.027	3223.989	2948.831	2882.056	3739.918	4262.599	2890.783	3270.267	3062.158	2994.893	2962.860
X603141556F1	64.94780	24.28703	26.49470	46.45592	22.89141	26.65177	31.40971	46.18306	66.80149	73.00883	26.13577	31.79121	49.21121	49.71628	22.88328	21.46591	72.46000	31.08455	26.15998	23.50603	30.33093	25.88212	21.86348	26.39122	31.27595	27.24085	31.73173	21.38242	28.45237	32.87527	32.55078	30.06050	57.49108	75.07094	21.32815	37.27714	31.08380	34.49679	23.83010
X603141557F1	102.70071	215.89188	157.24827	60.30913	108.03501	225.35291	292.85193	56.52126	127.18497	61.93412	221.71678	105.10476	25.67217	71.31001	136.73184	132.66393	71.43224	223.91005	139.89532	131.05492	512.25709	85.20217	170.89877	268.91596	125.18626	150.02982	159.46520	120.66047	88.19645	114.49815	166.39109	97.41863	66.45252	70.33302	101.37837	97.41044	82.66677	93.78098	88.16306
X603141558F1	438.5905	953.0503	986.5261	575.9887	916.3274	559.1354	768.8183	1448.8780	654.3597	209.9991	700.5299	789.7023	706.6232	435.8445	542.7416	744.9274	501.0726	630.8470	1018.9071	823.6148	2192.3772	856.1974	535.8295	657.9494	1118.5894	1448.3337	1042.9427	1730.7672	920.5319	859.9060	525.1930	653.1390	786.1642	385.8727	784.9527	565.1080	747.9016	871.8447	904.8916
X603141559F1	1032.2465	1426.4764	1590.1318	1551.5163	1524.9956	1296.7691	1312.3233	1734.6448	2425.7916	1102.2846	1102.1784	1260.3270	1758.7263	712.3836	1598.1519	1525.3092	789.0197	1271.8718	1885.1700	1814.1455	1149.7853	1912.2957	1968.8326	1054.3154	1329.9695	1651.1990	1748.2542	1464.4140	1882.2392	1660.7748	1439.0179	1677.3046	1566.0340	1737.5750	1427.1669	2235.9297	1859.8250	1571.7221	1195.4365
X603141560F1	5875.622	4746.303	5006.081	6227.221	5169.457	5580.239	5646.640	7119.585	6274.866	6207.014	6307.710	5513.442	6021.848	5983.958	5820.758	6614.455	7531.156	6375.319	4843.654	5438.404	6838.728	4725.842	5201.572	5797.211	4715.289	5238.500	5741.060	5634.478	5797.211	5506.418	5932.353	5608.846	7138.923	6603.166	5892.348	5819.850	6137.273	5809.733	4114.117
X603141562F1	4246.847	2827.242	4161.461	4846.300	2869.686	3711.342	3174.738	5197.066	2168.748	4855.682	3025.330	3768.434	5628.973	4622.962	3082.320	3420.236	5386.505	3126.128	3157.263	2863.076	3217.035	2645.564	3822.632	3450.668	2888.624	3920.069	3375.034	2818.894	2585.212	2022.189	3399.085	2187.509	5677.968	4806.673	3357.038	3196.555	2092.614	2172.062	2305.834
X603141563F1	317.1910	534.3943	912.7148	261.6680	320.1114	601.0144	539.2466	192.3080	340.6801	177.0978	643.9060	507.6025	117.1275	103.3672	366.4944	393.0425	218.3530	595.8643	430.3727	305.3136	635.2829	212.0860	755.5998	693.7154	396.9547	626.4918	559.3989	435.0903	227.3192	341.2521	536.1969	115.6516	228.8312	460.4460	236.5567	501.4437	213.4404	215.6431	230.0808
X603141564F1	91.28676	119.88065	175.35325	62.37310	252.51384	249.59958	92.90723	80.16002	2837.19785	25.97949	467.90309	119.32379	48.65360	37.44612	100.95345	122.32838	14.36074	151.57593	338.15442	191.60453	2833.18786	226.72762	188.26198	64.82188	204.63688	325.07229	146.03924	199.44155	163.80487	3177.74287	135.06926	178.37512	21.50469	18.17555	209.75759	122.24925	150.13881	167.78377	243.68337
X603141565F1	29920.62	26015.74	26381.09	26123.84	21943.93	25438.17	28342.02	27381.62	24537.62	30833.52	25592.40	24514.29	29555.50	23366.83	26554.01	24251.17	29753.71	27304.85	23645.57	23814.54	22343.59	23729.23	25839.52	27307.98	22479.57	24965.38	24088.23	23193.64	26052.98	23814.54	26172.94	22825.35	29206.56	29194.16	22935.55	23838.22	21444.89	21781.04	22314.85
X603141566F1	1585.271	1833.854	1258.003	1455.325	2041.945	1559.322	2153.232	1409.358	2511.272	1648.467	2116.285	2445.234	1280.859	2479.062	2114.983	1826.405	1876.464	1871.900	1721.313	3185.876	2517.710	2129.097	1767.261	1484.256	3195.858	1269.599	2328.077	2868.379	2199.140	2879.227	1838.800	1973.454	1773.503	1081.958	2209.581	2402.841	2360.140	2200.631	1919.745
X603141567F1	3057.946	2588.050	3111.638	3565.548	3834.646	3896.471	2439.814	3306.658	2781.340	3342.471	3291.307	3198.921	4540.804	5425.587	2715.638	3428.199	3165.424	3113.232	3145.539	3269.118	3245.541	3115.416	3200.732	2644.906	2515.600	3116.879	2950.412	3097.602	2431.611	2842.911	3126.527	3154.535	3681.780	3543.500	3922.699	3257.775	3309.177	3211.470	3242.888
X603141568F1	11.766659	15.194379	12.369901	11.409993	11.680158	12.164711	11.212267	11.281374	25.513658	14.328120	10.327728	10.163114	13.051402	11.005746	10.888350	10.588648	15.322946	11.711533	11.965072	11.770934	25.775824	10.005531	13.376645	11.902390	13.150170	12.426692	14.339602	11.466429	11.721726	11.031756	13.984600	10.520225	9.519658	8.689563	9.294824	12.637233	11.550786	9.568398	8.946617
X603141569F1	208.38753	245.57492	209.06224	245.60760	1111.55937	252.51895	184.04678	77.40967	1194.51270	163.82638	195.22407	183.10711	305.01531	138.51084	388.41176	367.78525	102.47450	223.13326	552.94637	390.92889	2585.00984	285.73981	330.04243	216.05667	304.86484	938.07103	282.10912	288.73291	274.71452	2355.98095	283.77794	269.10578	74.76351	115.87167	607.01074	339.25070	400.05118	692.38297	542.65925
X603141571F1	4884.500	4578.922	4783.812	5408.320	3340.516	4774.746	5150.192	4596.587	2585.571	5066.705	4988.807	3580.848	4373.278	4479.995	3150.356	4098.703	5300.664	4683.349	3467.363	3425.276	3890.505	2550.859	3887.716	5661.383	3557.689	3994.598	4067.680	3530.699	2946.583	3454.061	4016.936	2366.026	5729.741	5542.895	3486.431	3418.442	2652.100	3025.364	2741.372
X603141572F1	6408.373	6405.119	7422.714	6593.313	5201.587	6974.328	6727.434	7072.578	7403.695	6463.732	6953.001	6690.203	5840.686	5861.147	7135.125	5958.073	7708.061	6044.066	4393.926	5857.040	5624.556	6677.780	6310.397	6824.653	6054.601	6969.933	6240.612	5413.851	6707.575	6132.848	6304.149	6167.605	7048.921	7963.784	5197.331	6144.064	6020.584	5356.291	6168.609
X603141573F1	884.5631	801.7182	1036.3822	1412.9895	611.8689	892.3057	602.7641	1174.6120	651.0280	850.1221	1133.9686	640.0098	2030.9050	1224.7062	637.7892	751.5750	1440.8902	540.0471	702.9302	656.6119	722.3082	905.1359	802.2724	838.5715	942.4098	829.3264	603.9893	820.4872	766.6374	689.7452	686.4052	845.5845	1380.9556	557.8112	630.2128	610.8460	610.2856	551.6292	841.0506
X603141575F1	1900.617	1966.491	3485.554	2864.231	2975.564	2316.865	2353.233	2338.470	3033.189	2156.877	2468.244	2301.826	4162.617	2743.613	2409.289	2402.877	2067.072	2352.808	2306.683	3180.630	2333.307	2879.929	2783.101	1799.268	3448.712	3232.012	2213.078	3079.783	2902.283	2534.510	2374.412	3049.303	2250.302	1921.460	2471.541	2411.133	2706.949	2420.627	4046.049
X603141576F1	1507.0696	2644.6464	2254.1137	2286.9979	2033.0575	2725.5316	2219.6902	1606.1883	1505.5981	1961.0836	2673.7708	1497.6770	1954.4281	1784.9352	1911.0166	2104.2691	1928.4772	2477.1973	1514.6111	1695.2817	1816.4816	1204.5978	2072.6857	2793.9717	1966.1654	1972.9009	1959.5210	1830.1474	846.0713	1501.3870	2130.3466	1058.6425	2251.3511	2562.0912	1829.6669	1682.4944	1206.4479	1818.0140	1803.4009
X603141577F1	10456.020	8275.144	9830.967	10367.598	9021.635	8349.946	8657.005	11809.730	8463.372	12123.853	7996.736	8951.120	11392.775	12844.094	9845.480	8371.748	11108.535	8337.624	9670.244	9193.213	10511.852	9929.267	10421.609	7249.588	10766.988	11083.192	9628.265	9851.045	9506.748	11961.161	8912.003	9105.529	7933.062	9727.195	8446.404	9503.576	9867.042	8045.580	9471.125
X603141578F1	1655.1710	1701.8085	1375.7891	1854.7037	1208.7150	1769.6769	1331.4290	2245.8256	1311.9889	1668.2108	1760.2867	1520.9379	2484.0677	1601.4639	1310.1857	1592.1453	2112.3014	1484.0529	1390.4409	947.4858	1544.8340	1363.9656	1687.1971	1325.1888	1552.6466	1396.6503	1264.9448	1559.8291	1296.7068	1104.3722	1676.4375	1391.6521	2295.7300	1772.3026	1386.4051	1416.3884	1365.0991	1129.5468	1390.8325
X603141579F1	4918.804	3155.452	3001.918	5343.062	2854.503	3397.378	3066.315	5820.020	3104.246	5518.715	3643.478	3376.630	7014.737	3770.947	3097.144	4507.369	6179.108	3447.563	3980.416	3772.578	3614.365	3876.764	3808.867	2645.008	3471.170	2970.504	3836.205	3617.868	2298.999	2801.397	3162.063	2682.368	5778.509	5177.839	3642.042	3251.075	3539.284	2673.820	3681.135
X603141580F1	571.0332	1234.6210	194.4813	396.0339	314.7488	626.0819	1213.5792	602.3688	377.7114	721.7070	880.3598	580.9347	178.6296	153.9975	1228.6902	552.5615	713.2736	1209.3018	600.2392	275.0190	373.2781	251.5484	427.8698	1125.4445	386.1272	730.4209	541.5100	245.1401	1377.0510	922.2052	207.7932	685.0383	396.0669	511.6199	464.4157	436.0439	283.0797	442.8029	632.3510
X603141581F1	4386.094	6033.682	6365.753	4526.610	6689.612	6842.687	5637.492	4700.554	6518.810	4035.262	5114.859	6936.592	5285.500	4698.127	5678.329	6083.409	3363.546	6840.814	6869.374	6555.958	5207.442	6483.158	7482.728	7073.580	6318.634	7016.429	6081.416	5516.452	6271.674	6369.621	5887.714	6225.327	4489.546	4788.198	6349.684	7233.592	6606.486	5771.156	6142.046
X603141582F1	680.3512	700.2064	817.0487	569.8827	909.1737	799.4634	802.8696	517.9161	1204.8491	443.4130	652.9189	777.5214	537.4852	753.9449	905.2381	862.2185	558.8024	1068.0831	970.8308	1053.5387	1177.6076	1057.8857	748.8081	646.8447	967.1782	906.5281	813.5819	884.3270	882.3341	577.4716	778.0087	930.7627	495.6347	646.6452	1130.0777	1090.9521	1252.1060	920.2275	1034.8464
X603141583F1	124.07864	30.12150	29.19930	77.43516	37.52787	33.32312	29.46555	43.12288	38.33252	80.17891	24.95996	33.59479	57.31981	143.49755	30.70623	35.29859	77.38514	34.98044	34.44183	39.67151	34.93214	32.55212	43.71476	26.20732	29.51498	33.55857	40.20185	40.35936	33.55913	33.26132	33.90557	41.71907	78.19350	79.10907	27.72890	40.91798	52.21422	45.22975	29.62309
X603141585F1	123.10545	218.11384	247.35036	99.47172	295.21367	384.87139	184.03115	124.82407	4159.42950	32.94886	684.71829	183.42513	45.05692	46.21520	114.29576	177.35860	20.61479	219.32995	525.00912	271.79640	4068.12122	270.98046	288.25600	115.35332	224.64042	444.10583	203.21545	336.38509	264.83479	4550.22959	205.34673	332.30815	34.63653	17.69060	290.22203	197.25207	209.95560	227.91879	362.15196
X603141586F1	19.64606	43.30748	34.87879	25.73972	29.58356	41.61483	43.12364	23.00988	28.05221	16.75066	45.48283	31.99466	19.97167	17.29276	44.82168	35.02703	16.79024	34.28651	42.36102	31.39672	31.17637	48.16882	40.20228	48.00091	29.08822	25.41175	36.50148	34.79461	42.85078	44.19223	48.63155	43.78323	14.37585	17.94474	22.15364	42.39183	46.85808	37.65548	38.80270
X603141587F1	338.4300	484.6571	829.6952	537.9908	728.0240	713.3372	454.7440	349.2651	1498.7863	354.3883	417.8792	372.7658	547.4206	243.5356	788.7971	818.0905	409.5560	755.9375	846.9588	1155.2527	2517.0474	695.3891	1036.0708	644.7447	749.6009	906.8641	721.0265	515.7733	561.2734	475.6294	657.2584	816.2301	215.0741	194.1593	555.7039	974.6229	985.9469	664.9290	714.6567
X603141588F1	65.33532	202.85777	255.09214	207.70002	243.10601	217.42504	177.26371	165.37994	259.27694	104.24164	197.49088	216.41577	203.72151	133.93195	239.17199	277.62328	154.49498	236.92891	249.92946	216.04935	184.17326	234.62581	287.55787	175.60522	295.01639	250.81456	234.14875	227.53862	183.20053	146.63427	193.09580	172.14492	122.09916	51.29818	257.08546	279.88424	163.30928	210.75620	222.84582
X603141589F1	77.35904	518.71761	137.39993	664.60029	1077.42810	253.06059	287.49828	101.70421	642.69744	120.16976	397.61239	138.78869	505.78739	479.56160	363.96120	237.54377	46.30367	133.67686	171.35951	210.56455	502.13360	90.16799	92.31140	109.00102	453.40410	220.08562	110.81025	523.57482	267.93151	1333.38165	174.59223	310.09083	100.58426	48.76391	989.16289	337.52025	191.63548	835.78666	690.53898
X603141590F1	2380.7351	3485.7138	2931.3855	2284.7402	991.4992	3313.6894	2987.4905	2734.5662	1128.6851	2915.8464	2176.0061	2011.3674	2234.6492	2183.6559	1408.1034	3030.1631	3208.5833	3464.9751	2300.3371	1254.1644	1600.8320	1515.5186	1803.2003	4589.7054	2039.9950	2262.4719	2888.8338	1700.0356	1341.2425	885.0022	3201.3591	1653.2394	2534.2183	2981.1669	2504.2345	2393.6437	1322.1885	997.0135	1050.4608
X603141591F1	7854.118	6414.856	7151.199	7770.766	5420.121	7070.580	5007.736	8353.954	4916.877	8322.728	5725.985	4279.159	10295.824	7827.503	4968.865	5451.038	8966.012	5710.759	6016.115	5733.251	5564.093	4920.541	6005.275	5621.995	6142.590	6257.286	4725.705	5577.395	3950.318	4572.284	5241.422	4413.604	7949.923	7391.322	5223.406	3832.736	3588.338	4250.412	5678.236
X603141592F1	17924.38	21823.26	20927.68	19737.63	22120.45	17820.23	15813.78	19053.64	20846.32	18984.64	18399.16	21763.89	22311.53	21058.27	17555.07	20323.31	15508.38	19848.98	20863.12	19164.29	20971.01	17924.16	19788.11	17892.57	21649.95	21589.40	17118.66	21269.69	20813.12	20698.20	19368.70	23956.19	18758.50	17523.96	25768.73	21373.40	22688.34	22217.03	24287.26
X603141593F1	279.6177	192.4918	258.0235	425.0973	178.3805	259.6382	333.3051	331.1046	224.7032	189.2566	320.0588	214.7070	343.2630	517.2363	255.9025	225.8848	303.7937	215.1540	233.9194	208.2604	224.1568	245.8303	187.4542	189.0209	205.3131	215.4133	251.8888	237.4971	214.2097	219.3964	230.6455	265.6043	615.2185	NA	175.3182	294.8967	213.2699	242.4101	246.7722
X603141594F1	5729.567	4490.817	4765.935	5675.229	3426.759	4180.420	3670.015	7161.328	4525.781	5609.708	3042.304	4215.904	6213.165	6283.910	4071.271	3740.133	5935.422	4507.896	4705.765	3817.504	3254.362	4203.977	3611.739	3830.816	5205.193	4469.500	4337.417	3693.964	4877.685	4067.580	4191.154	4972.851	7182.878	6059.435	3425.266	3646.376	3501.068	3778.984	4516.964
X603141595F1	165.73723	335.36581	507.66387	250.93699	462.85896	420.65414	291.09199	286.39021	351.97788	188.37063	274.65731	402.10339	271.81435	96.99999	347.33013	459.31882	198.01077	484.43606	426.23334	436.60020	382.89112	342.44156	537.42225	383.67877	483.40067	471.04023	482.36317	400.52284	321.59276	327.22169	483.63810	316.39119	138.30165	98.42697	423.65226	518.91508	374.58946	338.83146	325.18356
X603141596F1	151.92626	269.98940	493.81533	196.71602	197.70120	275.13155	164.82942	257.43086	664.74894	174.30425	286.88472	352.67958	186.82717	32.51899	251.78663	200.77923	148.05714	324.10023	380.11326	229.80615	1021.41892	188.16914	391.70678	233.92441	327.76223	428.97219	285.02717	270.40081	228.17170	392.45541	289.96436	120.19091	110.95428	171.96900	202.03620	285.43394	170.79516	153.60434	234.24918
X603141601F1	1540.448	1271.956	1799.143	1820.859	1630.544	1571.400	1023.018	1590.840	1625.843	1603.429	1168.479	1279.344	2187.597	1875.834	1487.939	1185.594	1475.140	1290.900	1886.908	1829.991	1378.044	1917.667	1671.436	1247.381	1603.443	1898.473	1284.024	1414.360	1425.638	1357.623	1197.064	1468.565	1438.033	1462.008	1588.773	1340.517	1508.685	1382.930	2197.742
X603141602F1	416.7458	687.7511	1433.4216	850.4108	477.2410	777.3814	591.5575	1047.8483	1303.3325	525.7030	847.2356	691.5622	2001.5102	627.9861	668.2501	767.2793	829.7764	803.6313	913.6477	952.2635	721.7434	1119.0940	927.7903	619.5499	900.6933	1092.1942	678.5618	1129.8087	632.7051	427.5117	651.9035	803.4905	710.6918	227.9530	540.2536	674.1793	1006.8605	784.3781	1229.5414
X603141603F1	17528.20	23992.57	24519.71	16196.11	23961.39	26236.94	25452.80	15178.24	24936.84	16120.16	32106.84	25690.40	15143.36	18470.87	25082.54	23206.75	15955.06	24759.18	25536.90	26741.87	25188.31	27237.72	24978.25	19846.49	25227.96	23464.33	21448.32	24111.48	30173.27	23305.12	21596.75	29441.64	12144.00	14351.50	25576.29	26294.77	24119.20	24825.26	23513.69
X603141604F1	374.51346	83.96105	132.25368	161.69004	98.55560	103.04203	109.79188	197.66322	72.76406	207.38766	140.94252	93.66466	219.28180	336.21739	112.68142	87.24273	169.60571	65.60070	87.28805	118.47697	94.68313	109.00881	80.63677	144.28674	79.50978	86.52720	106.82056	94.13780	84.47109	84.07587	78.54602	72.38100	584.19084	249.51221	88.04012	78.89288	78.41489	73.56856	103.82148
X603141606F1	597.6507	307.9867	351.7258	266.7235	337.5232	380.1306	429.9295	256.2075	375.4804	465.1881	481.4789	364.5319	360.9715	526.9838	543.1887	348.9307	269.3764	323.1619	291.5208	287.0849	289.5538	390.3481	466.0151	413.3601	245.5525	276.1600	478.9790	303.9771	459.0948	359.9873	323.3332	366.5178	466.8453	484.8420	316.1039	373.6114	497.5678	409.9010	335.9155
X603141607F1	2990.837	3554.341	2754.176	2528.913	5693.155	3648.534	4755.010	2433.354	4195.485	2489.501	3061.644	4589.092	1919.362	3672.341	5043.052	4014.983	2081.385	3902.051	3126.678	5731.766	4299.029	4545.433	4998.944	4065.232	4305.151	2918.300	4962.383	4525.366	4860.131	4765.370	3698.891	3363.284	2046.884	2691.030	3629.373	5112.542	5337.968	4089.029	4182.645
X603141608F1	10195.941	10704.085	8891.693	10634.460	10189.511	10689.286	9423.193	10738.685	7644.251	10111.955	12347.678	10672.283	10286.280	8216.384	9310.085	10757.065	9820.412	10278.491	10386.760	9306.417	11749.341	8829.105	10679.405	9655.219	10162.145	9934.897	9935.944	10627.839	10863.478	9295.257	10428.180	10615.015	11223.951	10286.849	9217.858	9780.168	8570.390	10204.990	8209.547
X603141609F1	1862.216	2252.688	2762.841	1921.638	3124.925	3420.846	2250.645	1422.666	2320.722	2047.555	1975.503	2598.753	1541.156	1704.819	2930.343	3247.573	2160.660	3106.169	2957.551	3085.360	2343.511	2569.958	3844.857	2198.783	2294.483	2661.426	2403.655	1920.878	2522.527	1735.379	2915.575	2761.386	1232.835	1612.672	3009.457	3261.491	2963.366	2183.713	3641.049
X603141610F1	2632.883	4238.964	3868.370	2473.227	6464.975	4278.653	4336.165	2185.637	7434.676	1991.428	3801.611	4792.399	1739.448	2592.078	7141.951	4903.269	1567.194	5195.193	3893.829	5808.593	5420.351	4848.206	6730.083	4281.582	3500.012	4837.094	6507.083	4548.911	4933.281	5357.840	4684.227	3133.420	1844.375	1949.350	4812.264	4732.255	6569.202	5489.511	5486.990
X603141613F1	9016.968	6185.215	7318.129	8221.041	5859.884	8118.164	5685.081	7750.712	5312.018	9857.779	9712.702	5874.991	9440.779	10419.414	4375.000	7368.130	8108.396	7022.190	5271.882	6480.053	5708.256	4363.356	6604.822	6688.566	6064.665	6425.177	6053.746	6309.055	4611.952	4751.679	7615.033	4476.905	7400.247	9323.957	6188.566	6066.666	5522.983	5122.562	6040.496
X603141616F1	702.2964	827.6877	1254.0731	1074.3775	873.2501	920.8378	672.3156	1203.4181	848.0067	663.8493	827.5836	951.2418	1488.7512	393.7186	747.3227	900.8314	754.4512	797.9583	719.5418	885.4100	787.6855	891.0064	976.6207	739.4876	964.9828	784.5291	688.1735	919.8575	918.0046	963.7782	872.2748	885.6252	974.9845	770.1357	853.8509	1137.3605	878.1686	918.9918	990.8589
X603141617F1	6108.877	10862.181	2230.252	4491.673	10354.531	6611.113	13432.915	4989.753	4895.389	9170.404	10228.149	7222.078	3336.082	5445.534	9413.960	7977.235	6831.989	6322.400	3770.850	4790.230	6643.193	2056.146	7438.841	8736.456	3532.419	2451.862	7265.490	3809.770	9257.994	9448.518	7734.343	5787.910	9968.378	17933.426	7365.499	6010.154	3915.375	6276.683	5708.493
X603141618F1	13321.67	17713.96	18705.79	14615.91	20738.21	17309.63	17776.21	13453.35	18186.17	12981.64	14987.15	19317.19	14585.43	14197.96	16289.68	18195.33	10634.01	19323.93	18125.45	20390.26	16600.35	17247.48	19170.55	17879.10	18780.57	17839.11	20157.89	19009.40	21157.01	23242.96	16704.98	20651.39	14444.81	15549.23	18296.17	23484.79	23700.62	21888.02	17930.79
X603141619F1	9889.584	11623.903	7899.503	10194.350	10111.899	10510.667	12800.189	8773.289	7508.971	12345.847	13105.495	11683.820	8867.200	11306.511	9548.445	12076.123	9998.738	10255.790	13239.490	9321.671	9120.793	9442.846	10748.926	9676.532	6974.239	9905.246	12552.307	12324.477	12327.326	11245.982	10746.291	12995.938	9169.473	9090.597	9980.091	11620.401	10767.132	8924.423	8819.173
X603141620F1	2765.541	2024.985	2286.023	3329.626	2121.600	2462.879	2001.781	3651.730	2297.542	2900.347	1976.573	1658.676	3568.604	3127.264	2236.580	2098.980	2667.314	2186.187	1892.333	2322.206	2110.174	1768.571	1693.517	2034.302	1778.029	1936.919	1673.368	2086.347	1748.770	1914.364	1927.419	1699.198	4040.672	2948.924	2502.298	2361.571	2240.394	2357.767	2247.712
X603141621F1	19436.42	21426.53	22961.65	19622.82	20847.00	19360.16	21270.74	17811.17	24201.43	17872.86	23020.44	22959.16	21211.06	17155.84	22359.43	17398.06	16940.03	20016.81	16873.38	17944.45	19110.34	19960.39	21139.75	23759.24	23353.75	22128.23	18952.20	22066.74	19213.42	22108.34	19145.38	22350.36	19798.62	19046.92	14518.61	18537.39	19601.13	21008.66	22243.09
X603141622F1	1348.7901	1474.7776	1210.7708	1509.6382	2324.4530	1745.7345	1501.3799	1169.0397	2619.7352	1230.3596	1292.3379	2068.8762	1665.9458	1183.8822	1882.0086	1815.0276	968.2072	1706.5079	1651.6369	2726.5548	3806.3189	1937.2146	2756.2258	1373.0034	2580.5748	1785.9955	1760.7154	1781.0319	2561.3996	2932.9086	1868.3478	1715.9316	1119.8667	1356.2163	1846.6284	2407.2167	2264.9075	1947.2955	2139.3022
X603141623F1	47.42493	62.53380	80.81970	43.37048	58.93666	81.09997	63.19056	64.66431	153.79876	47.05188	64.48550	75.34646	24.04200	22.04292	57.47644	73.84564	47.40839	79.11688	80.82986	72.03558	161.51366	105.11049	72.55718	59.56908	71.79837	112.28513	86.40369	71.14700	67.92264	206.54856	69.37748	50.19999	33.68361	19.80461	65.07943	79.74853	55.94645	44.77444	67.30557
X603141624F1	3209.123	3290.010	4328.828	3736.846	5099.104	4393.640	3347.070	3506.545	4676.284	2732.012	3671.131	4794.017	4459.393	4552.227	4786.862	4877.260	2417.505	3664.864	3488.561	5263.187	4512.936	4738.390	5415.428	3547.135	3685.685	4348.614	3302.345	3778.731	3619.923	4365.497	4582.274	4713.547	2598.995	3576.004	4672.163	5171.583	4254.071	4471.425	5436.090
X603141625F1	356.0591	496.1876	997.9904	661.9269	673.3514	712.9897	586.8528	553.4182	536.4520	300.7439	500.7965	738.6428	654.0185	110.2838	826.3395	814.6661	333.1226	655.4475	701.4241	606.8640	565.8198	867.3500	880.5574	604.2718	685.4719	698.3805	717.2608	575.5756	582.7167	625.9166	690.2958	716.2836	368.0010	274.4370	629.8296	825.0108	813.3388	780.1559	769.5063
X603141626F1	7709.492	7250.826	6406.680	7618.750	6906.481	8010.531	6927.608	7645.471	5201.463	7522.143	7251.353	7237.951	8473.976	9780.698	6163.972	6771.052	7765.917	7390.641	5484.732	6437.812	5925.314	5569.386	7206.310	8471.480	6396.935	5472.992	6417.120	6424.612	6162.396	7293.731	6541.505	5720.046	9303.173	9178.483	5936.061	7129.669	6493.831	5793.644	5933.682
X603141627F1	25015.57	17026.55	19457.52	19486.87	13419.83	18643.21	17755.90	22921.31	11199.64	25651.60	18545.84	16113.39	24784.48	12942.03	12275.92	15319.31	23458.49	21072.90	16601.84	15978.48	12968.42	11869.69	12368.22	20129.93	14369.84	17661.80	19796.35	15430.56	13350.88	21356.93	16006.45	11041.05	28413.72	26674.98	12924.28	20632.70	11572.16	16552.58	10402.46
X603141629F1	35.78730	70.61300	131.76062	37.12087	58.08228	104.04229	49.54796	39.04729	97.94300	21.29592	103.29203	88.80260	32.69733	17.13778	53.76998	99.67882	23.92303	92.63790	69.72479	83.03768	87.46372	63.06410	104.78798	69.60516	119.50905	113.42302	65.66793	94.31667	53.12367	54.93837	103.67227	55.23031	19.91971	19.10484	79.90641	84.99669	70.88449	54.50739	52.17404
X603141631F1	24888.60	23723.44	29198.65	18914.36	24355.55	25654.50	25471.85	26089.96	20923.54	34298.14	19430.91	23931.22	22957.94	23561.14	23023.03	22175.27	22744.11	27748.72	28390.93	25937.98	22823.58	21343.38	27320.33	29767.49	25471.57	27157.63	24124.58	22737.40	24244.38	23862.69	24856.52	23256.64	19714.69	19770.67	25863.86	21692.74	24206.52	23666.36	24042.33
X603141632F1	11501.107	10249.992	11580.416	12533.451	8295.824	8930.913	9896.029	14261.826	6592.327	14489.654	9048.545	9471.518	11903.093	12724.161	6752.788	9228.898	11711.262	9452.214	9804.861	9289.026	8007.992	9274.532	8021.520	9260.262	9506.605	9776.349	8072.253	11601.188	8120.861	7112.266	8066.709	8900.706	15027.346	10877.430	9073.725	7839.004	9729.795	7570.308	8767.335
X603141633F1	7552.627	9481.161	9639.463	9673.677	7980.158	8398.724	7557.616	8708.088	8357.641	7214.396	7942.450	8524.420	8413.948	6128.979	9296.110	8303.703	8073.623	9008.867	7785.417	7707.531	8118.276	8501.505	9354.303	9121.222	7668.028	10192.399	8641.529	8497.688	9302.197	7784.341	8779.042	9320.876	7513.225	6525.968	8578.525	8966.339	7964.281	8832.910	8675.812
X603141635F1	79.25586	25.28030	47.20811	35.54495	51.11632	39.11239	25.53064	80.16844	20.42427	61.71638	33.28847	27.74134	47.62277	121.56074	38.88888	26.35861	59.82604	26.72764	26.71406	42.75525	28.26819	46.24541	26.79500	38.38613	29.57090	23.28500	46.23345	25.18567	32.37363	31.50327	23.48759	27.25612	99.50098	98.95194	30.00446	36.61279	21.34310	32.17863	40.15339
X603141637F1	214.73774	77.63702	49.36933	96.58426	71.82243	78.30240	102.92072	164.04394	71.64791	157.75806	75.07545	142.14693	72.85981	341.68205	56.03131	56.12091	159.52511	74.40173	51.70676	91.60197	46.90121	60.40859	57.60660	358.72449	317.14834	57.30121	52.80543	197.80553	102.29277	79.57561	69.63462	51.57192	45.34811	72.54460	159.16213	69.49219	56.41589	64.91401	145.89738
X603141638F1	1512.7091	813.1863	1128.7548	1249.9387	396.7334	876.8098	1768.2622	767.2330	617.7402	399.0088	1719.1703	445.0703	676.2931	450.2854	1366.9480	1632.1639	321.4706	603.0653	1064.3972	834.0779	901.8905	675.5393	664.5032	1822.2168	839.0680	1724.3609	1383.6266	984.5306	940.4259	640.6882	1300.8736	603.1496	519.3183	2066.9902	378.8251	1473.2846	940.4625	582.4714	604.3510
X603141639F1	254.7975	355.7544	544.1225	452.8019	325.3456	609.9727	411.8049	333.7259	354.8773	421.5930	428.3406	395.2959	352.7180	135.9864	257.4990	368.2522	444.2720	547.8447	276.5549	334.5397	321.0446	198.1492	504.6230	348.0331	336.1006	530.6348	348.1636	386.9091	319.0115	252.5564	448.4655	226.6488	198.3528	155.4810	395.1835	325.0754	348.7467	320.6220	309.7994
X603141640F1	900.7215	1386.6603	1687.9770	1584.9976	1139.2348	1542.6791	1412.6578	1777.3410	1089.1453	1532.4926	1755.7934	1157.8106	2118.9870	588.0478	1196.9167	1285.5750	1474.7400	1304.3174	928.8821	1101.8908	1118.6673	1078.2473	1233.5923	1266.6310	1158.5937	1232.3539	1109.7850	1323.5393	1114.2174	1086.4187	1253.2837	1099.8204	1743.9038	1178.0261	1120.5596	1201.7210	1222.0101	1046.9189	1132.0199
X603141641F1	1739.8373	1055.8964	1813.1723	887.3486	1287.6332	1225.5607	1061.2375	807.4887	2114.7133	951.9787	730.5542	1049.2110	1167.3120	698.6416	1312.8269	1904.7843	1234.6617	1348.5851	1195.3803	1970.2794	2447.8006	2086.2465	1772.8434	858.9625	934.4518	1310.0398	1239.3606	1189.8577	1653.2488	2789.8766	916.6715	1437.2296	927.6210	1082.3477	799.8229	1431.9423	1892.5887	1478.1912	1389.7536
X603141642F1	198.58488	128.38449	152.29360	65.42535	156.31254	143.81314	128.28135	173.59832	90.21203	236.31312	161.91946	128.23067	77.02762	191.23501	170.48814	155.40014	143.01927	69.03237	94.17397	142.52918	146.43809	178.31098	120.25496	196.22627	80.90780	58.00871	119.55749	131.04129	155.20166	121.74457	82.56900	121.22605	169.43473	218.64365	124.52104	128.56616	115.68549	127.77135	146.02888
X603141643F1	1063.4965	428.2485	528.0981	760.8401	519.1341	504.5627	584.5040	621.2019	465.2406	1040.1719	477.8741	517.8076	612.8237	911.9134	540.9612	567.3696	1048.0890	596.1363	576.7948	637.6711	465.3762	640.0140	588.1258	385.2910	508.0693	528.2429	601.0786	468.4769	518.6405	477.3407	597.3274	462.5191	970.9208	989.4896	530.6850	610.0410	724.2172	482.4384	511.3734
X603141644F1	16.29485	34.36880	39.15011	20.71542	23.81067	24.47864	31.48941	21.80855	48.68679	17.90478	37.21170	40.39159	21.59283	15.44676	26.02262	21.00049	16.42444	36.90806	20.69506	27.03623	20.56979	25.39436	27.38218	49.17305	23.17891	23.10572	33.13897	21.86178	23.01289	19.78686	32.57851	23.52407	22.65796	14.65304	20.22497	26.16405	29.54196	23.10516	34.37225
X603141645F1	1148.6463	860.8708	1237.6970	1105.0978	721.7214	877.8224	604.6843	1480.6746	1006.3109	914.1712	905.0637	967.3132	2161.3250	1042.6112	839.4180	868.5772	1139.1999	950.5315	827.7983	1052.7160	682.7846	1015.0023	938.2530	847.2912	1174.7261	914.8386	881.7225	1112.8812	717.1025	862.8828	795.0925	1010.2849	1892.5400	1138.1586	737.5083	769.6714	885.9765	740.5240	1008.1370
X603141646F1	234.3513	401.6508	619.0261	422.3631	387.6076	341.5768	308.8845	375.5076	353.3627	238.9379	497.5715	398.0237	466.8585	171.5444	350.0385	423.9009	336.3894	461.8137	429.4625	468.9706	286.1057	467.8079	418.7943	295.1719	420.6268	556.7327	386.0204	440.7977	397.2007	320.3112	369.6369	359.5390	314.2600	173.5571	426.5609	383.6603	398.5459	379.1610	442.9326
X603141647F1	5545.448	5641.900	3949.661	5301.458	4935.163	5426.676	5157.401	4458.214	3461.433	6620.524	6822.735	5086.405	4799.215	6333.564	4685.587	6127.429	5279.895	4790.793	5253.535	4590.629	4566.159	4694.205	4911.724	4537.683	3903.171	6064.494	6086.602	5864.479	5096.187	4457.267	5383.290	6428.673	4970.732	5725.397	4865.834	5029.309	5310.656	4047.877	4436.104
X603141648F1	95.30431	38.15179	27.50737	62.37485	52.68561	39.47674	49.32794	58.17543	50.93423	59.57809	32.23328	52.54529	107.13133	165.00270	59.75747	41.32735	51.36271	36.41217	57.67203	44.08638	39.01119	50.18981	60.95100	42.14179	42.35227	34.08349	35.17540	51.92324	58.46270	47.22940	47.36750	56.69582	87.33750	127.84436	38.34346	60.24787	69.69571	52.98454	52.29686
X603141649F1	2252.245	2872.269	4258.028	2737.248	3059.786	3764.005	3484.611	2418.691	2489.332	2194.872	5777.444	2662.450	3272.529	2703.463	2713.654	3272.529	2843.653	4000.291	2515.260	2914.404	3428.732	2298.395	3610.202	3163.724	2880.285	3174.029	2696.092	3089.210	2294.071	2102.578	3436.054	1696.863	2735.830	2636.425	2904.382	3059.524	2492.547	2049.272	2625.280
X603141650F1	15413.838	18324.815	19793.268	11493.446	20125.560	19318.484	17204.497	13211.372	20886.819	10876.806	17811.602	18581.466	20859.457	23221.460	15895.187	17847.819	7918.683	18878.561	18223.556	20790.581	19463.919	19294.046	19981.867	16633.925	21674.766	19151.012	15886.421	18396.876	19236.039	18257.535	17988.488	22573.656	15683.821	9279.780	19578.860	21358.717	19594.946	19151.012	21505.251
X603141651F1	963.0218	1619.9665	2178.5369	1677.8887	1725.9218	2255.4237	1482.6148	2297.7995	1452.9402	1317.9595	1846.8146	1399.0374	3172.8533	3457.8232	1326.4636	1984.6386	1383.5017	1632.1313	1437.5563	1843.7704	1775.8252	1428.8443	1740.1513	1592.1104	1828.3263	1689.6163	1287.0741	1901.9217	1476.4660	1316.9107	1882.5219	1714.7926	1626.3736	1602.2382	1931.1958	1914.3526	1544.4314	1697.8811	1779.2638
X603141652F1	190.72847	82.74145	144.54805	265.07497	53.72126	82.04325	74.40247	318.96119	30.10539	364.93331	142.58226	54.18956	147.69623	288.61321	62.11011	93.54120	403.36745	71.91060	37.94163	60.60651	68.14148	50.12724	54.05154	133.98445	63.09144	77.63150	52.28371	46.78711	43.94038	53.74574	92.76486	36.22969	353.72678	277.79105	47.41030	70.76758	34.41459	38.93912	45.09915
X603141653F1	21384.41	27313.07	29326.24	24305.65	24485.96	27897.90	25338.14	23805.28	20078.53	22177.49	26324.25	23472.75	25274.43	24931.43	24643.81	29588.12	23327.41	30118.44	26198.39	23596.52	21602.39	19582.93	29437.41	27338.22	24455.57	29038.07	27317.71	25314.48	22149.42	19930.87	27902.94	21412.31	24042.25	22369.14	26415.59	24811.53	21206.87	22748.84	22668.14
X603141655F1	20485.870	17046.803	17195.888	26118.694	12361.563	15464.904	15236.458	22119.541	11367.525	25856.620	14826.288	12496.818	27740.986	23536.388	13088.605	15480.573	29106.124	16231.368	12613.400	12682.320	13285.424	11352.827	15436.863	17406.206	13702.298	15968.381	13958.366	14235.000	10647.479	10763.031	15052.877	9856.163	25857.009	24491.490	13084.800	11769.988	10983.618	11690.636	13374.843
X603141656F1	112.01941	215.15540	267.60619	102.07470	125.20157	175.00263	113.84467	121.28246	211.50504	131.74327	148.62795	103.33808	124.39210	102.37652	104.41937	153.78963	113.49791	124.54780	128.21726	174.87951	134.39325	94.48167	139.05748	178.82738	239.90475	135.05919	88.89968	300.22305	83.30908	177.99658	174.54836	82.83194	132.01252	81.18932	138.68010	113.83557	129.55289	117.09113	193.28565
X603141657F1	5637.540	6809.212	2290.213	4644.764	3079.836	3404.050	7675.061	6210.784	2904.192	6884.853	5855.409	4546.668	2121.747	2038.469	4999.700	4361.149	6927.438	6885.197	4104.205	2004.606	4020.257	4886.588	2025.302	5804.635	4276.614	5498.663	6572.811	3293.831	5117.272	5281.111	4900.813	4786.989	9265.525	7791.233	3960.907	2798.631	3106.757	4201.002	2563.323
X603141659F1	10954.676	11848.578	10238.925	12381.494	8132.959	10522.384	10309.396	11784.725	6685.358	10747.949	10314.879	8630.854	12899.838	14671.606	8635.145	9665.873	10982.368	11853.312	7633.203	7752.626	9429.679	6162.240	9346.218	11846.245	8938.758	9573.147	9378.148	9241.901	8092.551	8146.675	10591.269	6700.328	14699.221	14593.909	9444.107	8146.675	8618.284	7774.164	8401.474
X603141660F1	1163.1962	2396.8219	2732.5365	1163.3846	3694.3471	2887.2211	2655.5715	1018.5821	4068.5046	850.2325	1980.5529	2607.2243	1138.0227	1166.1107	3275.7378	3787.7019	702.5741	2388.2598	2944.8386	4844.3752	3569.7683	3373.7857	4006.2778	2250.9516	3523.0164	2402.9377	2287.5278	2719.2378	3490.5586	2476.9071	3627.1867	3526.8429	427.7634	555.2807	3816.2112	3409.9391	3853.8274	2983.1832	4579.7498
X603141661F1	18373.38	27166.26	25559.30	18615.80	27132.96	27676.36	23448.77	17735.92	24493.69	20315.72	37594.72	23991.63	18322.55	20489.12	22496.72	26864.07	17955.21	24023.44	24122.29	26085.90	25038.51	19253.27	23145.74	20610.87	25023.69	22552.99	22637.52	26491.80	22929.06	25361.92	22198.89	16419.45	16605.85	16658.89	28249.27	23578.99	23710.85	26495.24	23158.47
X603141662F1	53.60690	177.79709	196.00879	108.88053	184.96077	145.80319	92.01489	96.67492	312.84201	33.51320	166.43643	143.66756	142.01671	66.66181	198.18813	178.19294	31.87773	141.41888	171.83240	213.78442	299.10518	143.85848	141.00226	123.57275	238.12181	191.98487	167.47755	270.40967	136.06044	182.38576	216.82511	190.92531	26.12672	14.03835	274.26547	202.52095	165.05397	191.24083	176.45627
X603141663F1	3418.557	4199.999	4994.040	4011.196	2726.559	4133.030	3037.617	5318.975	3240.880	3336.305	4332.765	3125.694	5097.241	2962.643	3589.779	3763.001	4821.828	3959.654	2990.461	2900.019	3226.226	3710.662	3124.487	4178.722	3121.178	3821.648	3455.721	2830.173	3319.305	2714.025	4050.073	3616.222	5959.822	6234.594	3040.419	3571.144	3205.984	3064.608	2977.077
X603141664F1	5577.218	5134.897	5533.878	5345.151	3108.081	3522.227	4542.930	4954.875	2965.956	5993.813	4320.985	4256.229	4350.371	1824.690	4434.366	4856.324	5675.602	4739.716	3856.921	3621.202	4377.227	4157.878	3115.068	4166.552	4660.483	4872.385	4607.422	3284.807	4928.463	3512.978	3710.718	4411.424	7499.116	5648.730	3643.441	3486.446	4355.773	3644.789	3382.769
X603141665F1	2920.812	2137.599	2053.120	4540.065	4565.656	2726.132	2081.036	2772.643	2096.959	3916.898	1665.499	2519.543	5597.003	6470.181	2682.727	2894.766	3541.816	1483.858	2714.040	2859.876	2152.289	2256.181	2517.298	2059.415	2587.178	2042.991	1412.468	2528.558	1831.455	3455.385	1991.758	2093.003	2640.055	2766.888	3709.690	3223.026	2654.599	4645.206	3463.016
X603141666F1	630.9362	633.4335	995.3509	703.5654	329.3720	994.9046	789.7416	606.7153	244.7422	815.3185	1045.8514	265.0893	490.2447	578.7564	394.0841	610.4993	840.4876	713.9005	414.5200	324.5783	404.8593	259.6119	490.8141	1139.2507	407.0495	529.0367	499.7505	445.8148	210.6784	196.0241	627.6004	120.0600	539.8943	544.3019	405.0516	357.7223	233.1279	250.6806	261.7721
X603141668F1	120.046842	133.177374	201.803274	80.684193	98.336015	98.924185	97.824041	145.851146	NA	56.230746	164.460144	213.104814	20.750122	-6.962188	63.314808	123.687645	86.056664	125.041238	253.924715	230.126721	549.723562	308.184680	222.763446	50.095638	177.055244	287.724466	220.131489	163.802787	218.655265	NA	111.598378	123.941693	191.507374	24.269251	99.914283	112.735870	241.618681	134.584695	185.561471
X603141669F1	3941.801	3009.484	3633.345	4304.738	3659.752	3697.252	2401.799	3895.534	4195.936	3922.603	3439.285	3014.751	5622.394	5836.820	3950.400	3543.077	3744.406	2849.094	2352.000	3236.055	3007.345	3193.267	3405.090	2716.787	2866.243	3138.329	2415.407	3139.785	2776.107	3323.956	3278.300	3017.668	3871.080	4048.744	3735.045	3650.534	3079.511	3666.675	3607.785
X603141670F1	16216.08	14983.32	17406.26	15648.74	14169.48	18787.44	13950.08	16019.86	14782.98	14674.15	15211.34	14103.14	18504.40	16720.54	13542.19	16337.74	15821.32	15659.84	13703.58	16704.15	16125.87	14588.22	16406.64	16469.95	16252.36	16190.58	13657.56	15445.48	13676.61	12721.56	16786.44	15274.58	15027.14	15782.78	15422.51	15930.65	13888.86	12163.14	15197.17
X603141671F1	41.701814	191.484767	396.576124	61.043025	140.474452	253.848686	171.151734	82.957968	190.018824	44.945326	282.573984	222.638060	7.387251	-1.802953	70.978584	128.562258	83.058197	205.891009	172.011449	97.714882	165.030944	187.753057	293.543669	244.837973	191.702162	289.248961	179.121668	227.086370	125.745743	170.338352	234.731181	153.445401	4.048535	12.125016	181.124853	87.466991	148.703506	138.761256	106.767336
X603141672F1	6726.458	6296.772	4827.286	5744.211	3504.588	6338.289	6366.428	7635.506	3845.241	6779.056	6630.818	5030.669	6640.652	6185.867	3921.396	5050.508	7487.758	6095.703	5140.895	3326.938	5032.351	3710.504	4259.741	7871.528	4528.539	5342.350	6075.676	4571.848	4500.334	5111.564	5585.367	4307.688	8822.413	9739.475	4890.983	4706.364	3476.607	4220.039	3426.173
X603141673F1	938.4470	1592.6545	2238.2512	1083.7247	795.5775	2065.8724	2021.7404	1260.0479	796.7842	1379.9493	2368.7940	1222.4903	897.1887	105.9852	940.7423	1184.5938	1805.3126	1469.5224	844.9948	907.5526	941.9614	527.8274	1372.7739	2509.4577	1042.9704	1557.3871	1255.5362	1044.6842	630.3893	752.2623	1530.3746	424.6072	1090.0999	1161.8116	829.0092	1016.4833	444.6895	578.0677	853.5215
X603141674F1	12.59418	42.99203	37.25624	14.31865	18.57693	27.83193	32.87079	19.75636	19.62840	15.44548	28.96425	25.45380	13.49717	14.37770	52.39917	34.24829	17.48865	27.89445	25.25489	18.27812	28.58424	22.88615	26.69070	27.19760	15.53329	30.49940	22.40310	20.14960	26.57008	23.83913	33.20571	17.67815	18.19849	17.83338	18.55285	14.11495	18.97766	15.11778	15.65660
X603141675F1	3092.498	3177.084	4403.380	4110.428	4623.141	2460.906	3444.391	3521.665	4978.454	3415.584	3163.836	3657.760	5086.964	3493.577	3262.521	3940.896	3219.228	2808.912	3227.461	4888.841	3709.999	3690.311	3686.876	2012.830	3808.045	3372.352	3628.173	6101.955	3647.125	4712.916	3507.292	4397.932	3111.769	3372.124	4037.852	4097.942	4900.160	5444.527	5083.315
X603141676F1	1863.5765	1150.8375	2011.0184	2611.5245	2120.6255	3172.6872	840.5277	3036.9742	1748.7242	2276.2417	1700.4361	1495.6357	3072.8145	6286.4983	2066.9012	1683.7601	1653.0590	1141.9899	1583.0676	2280.0538	3869.5037	1168.7670	1283.1603	1094.4724	2247.1838	1589.6952	1083.5325	1805.3744	1315.7534	1981.4511	1548.0155	1376.3573	2683.1217	1888.6722	2240.9171	1586.2752	1650.8843	1611.8898	1961.2044
X603141677F1	382.3371	721.5602	982.3576	681.9084	652.6555	847.6437	620.7381	783.7484	654.9283	585.6123	909.8294	723.0039	882.0696	403.2056	743.3466	765.4862	614.9118	690.4748	579.5356	710.3857	680.8313	713.4855	830.9740	613.3379	870.3386	875.4268	617.5794	737.3333	877.1954	562.5944	775.8890	852.6442	621.6484	327.4741	482.2702	717.8208	550.0991	569.5744	688.7929
X603141678F1	2352.292	4049.437	4993.662	2516.976	2918.935	4351.213	2977.159	3272.956	4591.621	1786.614	3566.989	3825.930	3384.439	1564.697	3862.125	4116.378	2517.548	3786.630	4412.736	3590.275	3580.756	5353.299	3274.177	4101.614	3808.032	4543.221	3490.273	3079.987	3288.593	3195.499	4344.490	4171.992	2623.107	2098.239	4088.841	3964.937	3828.820	3981.424	4689.337
X603141679F1	1119.967	1647.789	2451.007	1740.920	1496.186	1331.578	1283.424	1556.237	1866.873	1013.707	1619.781	1863.138	1947.276	1416.616	1359.962	1621.031	1365.753	1296.258	1660.851	2546.645	2434.006	2179.654	1905.438	1110.421	1890.484	2179.876	1367.627	1485.848	1888.855	1453.385	1440.184	1622.758	2064.937	1283.679	1198.844	1445.487	2324.182	1567.576	2027.902
X603141680F1	300.9337	229.7029	198.3249	255.7347	216.5979	242.0878	180.1781	164.1050	1168.7639	296.6728	309.0261	233.1489	103.6798	161.3443	419.6077	324.2724	161.5747	238.4337	419.9893	215.7144	1713.9875	264.1888	323.8027	285.3856	348.0672	126.2977	357.0344	341.1570	436.5356	498.6452	230.8077	165.6301	199.5743	137.6956	270.8199	297.5106	327.9132	274.4805	304.4583
X603141682F1	19407.244	18562.252	19170.927	11025.892	24843.914	19926.410	18459.225	13625.931	16167.380	20910.998	14754.623	19619.133	14073.489	8189.301	19578.336	16769.714	11902.966	22063.642	16354.698	21897.205	13652.485	19936.910	20312.061	22053.032	17647.994	22367.304	24147.240	16732.984	15055.551	21002.653	18442.233	13543.504	16439.760	15108.764	18889.264	19094.359	18695.368	14170.297	14048.343
X603141683F1	46.31952	128.51402	220.76267	60.08299	77.02847	193.67645	123.07304	37.17700	65.39056	24.03947	195.72652	65.36895	26.86680	34.26010	40.62211	121.41177	27.25110	134.72815	106.68573	91.53588	106.64153	39.29753	106.65195	157.21543	115.30788	130.93364	119.06322	128.66010	44.81512	38.58687	149.74459	37.68038	38.92995	38.03812	85.79385	64.91754	46.75451	40.52660	54.14702
X603141685F1	88.87656	42.12001	43.21611	91.32624	32.09430	41.32801	64.14423	85.35233	28.94323	107.70065	45.17096	42.99531	88.95278	103.51673	34.08596	34.17065	100.77341	37.92764	27.74017	33.00198	32.44901	27.60904	39.79549	50.22015	29.73735	46.79603	34.52978	33.83459	36.67927	45.70626	53.59104	59.96381	89.15322	149.16041	32.70078	30.82783	31.27214	32.96543	30.12105
X603141686F1	72.98682	78.53264	59.33327	78.38674	104.01605	79.89195	95.66978	75.30415	79.80822	88.30507	80.09245	103.26298	86.62559	101.08971	90.56451	79.37480	81.40916	68.38288	79.41329	90.15538	75.90138	83.97116	91.35965	62.22725	64.36698	77.81644	99.16627	75.95573	72.09056	71.58071	82.22693	80.45057	123.85525	111.28568	59.80002	85.98300	98.34193	82.54211	71.96045
X603141687F1	5768.366	8249.510	8511.893	5597.512	6343.916	8920.738	8926.869	5571.332	5216.281	6236.650	9189.287	5823.738	5280.202	4739.737	7615.025	6541.992	5838.420	8469.761	4904.096	6311.865	5831.964	6904.596	6799.411	8902.053	5901.686	6842.335	7829.873	6059.538	8515.779	5257.245	6822.666	6391.545	5234.940	5125.895	5360.261	6245.941	6243.421	5377.276	5776.530
X603141688F1	19768.07	19127.23	19484.69	20271.56	16684.32	19484.69	16904.27	22129.98	17094.88	19459.34	17893.31	15892.93	23805.76	19306.39	17118.41	17322.47	19374.34	16849.85	17145.49	16251.07	17724.76	17908.41	17543.24	17788.87	18247.17	16387.16	15832.52	19511.03	17893.39	17021.52	17460.86	16543.72	20909.16	20700.53	15540.31	17722.09	18695.85	17331.81	19018.94
X603141689F1	20.75742	74.26291	74.52614	52.55907	49.41327	68.84674	41.26746	28.70303	82.28030	22.88386	100.87841	44.06000	36.13790	21.12901	46.13715	62.41443	43.27293	78.59571	40.89021	34.96414	209.41165	42.58038	48.78771	55.34174	58.40076	98.49501	55.54656	47.60490	35.41346	37.47738	89.14270	42.57931	22.85575	20.87916	84.08151	36.76490	30.20814	42.77839	43.84556
X603141691F1	34.38517	33.74137	41.44810	29.94930	34.48119	46.68577	88.38067	26.56682	41.56950	26.47875	39.36570	59.24724	16.05254	22.12460	49.35378	46.37676	28.10984	38.61692	50.32026	36.45913	46.67555	53.12980	46.03182	48.63016	33.73892	37.26110	45.61160	48.89609	66.30192	59.71943	41.35866	53.96661	31.77124	30.47290	37.34088	65.91566	76.44626	74.40671	64.82929
X603141692F1	14776.52	14711.11	15787.94	13107.79	14263.54	13304.98	13468.97	13107.79	19546.65	12314.24	11817.15	14301.84	12420.82	12273.90	17262.33	15527.55	12097.42	15091.41	15743.16	15407.85	15213.49	16482.10	14246.10	11739.79	16966.34	15593.66	13301.38	15105.48	17444.90	15477.20	14865.32	16441.59	11190.91	11732.76	15432.77	15648.96	13261.01	13621.61	14609.22
X603141694F1	41.76654	43.14865	67.64614	40.93052	63.21137	46.39898	50.06765	31.31531	82.97604	48.60605	65.36778	59.03144	23.47413	32.55310	70.42705	56.28819	39.65782	51.95014	49.20344	75.03179	56.48000	77.63719	67.42359	53.47079	44.08948	58.95122	56.75401	49.54857	73.63151	65.69900	41.39580	67.98866	26.48187	26.36359	55.73578	61.95739	78.48129	70.32874	69.41729
X603141695F1	855.3808	1311.7227	1796.9969	1405.5883	1676.3189	1310.9048	1313.1683	1142.4145	2208.1282	853.5195	1358.0802	1354.6812	1725.3500	1527.5216	1602.7997	1542.0174	812.3580	1502.3776	1254.8507	1790.4084	1703.9501	1546.4261	1520.6648	836.0749	1682.7043	1207.8061	1093.4679	1768.7262	1366.0084	1249.5203	1348.4417	1577.6718	874.8442	605.6707	1554.4687	1784.5761	1883.8204	1478.5233	1795.1370
X603141696F1	61.62305	217.22978	242.37342	137.32109	138.49484	202.44923	114.43974	242.56431	171.73634	91.11060	238.50234	211.38105	232.12591	15.24697	148.43787	238.84611	124.71718	295.47512	287.81880	195.68859	172.53281	213.39980	177.82064	141.73164	275.77584	259.71329	272.47305	218.44563	193.55684	194.15871	261.40407	222.00247	115.11187	38.90276	225.77529	192.14825	231.22351	174.95700	191.83365
X603141702F1	18566.71	20241.86	19603.24	20519.19	22246.78	19519.01	16924.43	18145.02	19753.24	20148.86	18776.21	19082.88	21672.08	24520.03	18571.87	18852.28	15698.79	19602.78	20615.24	22077.30	20310.78	19359.46	18124.57	17288.84	23093.97	19741.80	19290.17	20082.41	18583.32	18064.57	19554.17	19354.85	17907.24	16051.48	23831.85	19677.21	18348.93	19820.35	21525.83
X603141703F1	277.6547	442.2824	561.4461	322.2346	395.3783	287.1555	303.2008	300.4240	894.2126	272.2160	407.4923	385.2125	446.4391	399.8010	365.4981	391.5013	208.9741	342.5081	352.9363	516.4333	1000.0089	470.1289	316.1974	410.3170	683.5013	464.0925	415.5982	992.0977	304.6405	322.1227	458.1199	352.8687	495.3153	132.7788	434.1901	405.1098	297.2823	272.8904	432.3374
X603141704F1	8149.926	9478.714	11295.380	6776.734	10090.963	11513.964	10475.967	6886.579	10955.101	8025.973	9819.263	9513.563	5793.191	6491.236	10838.467	10825.835	9498.513	10018.026	9840.707	9728.551	12533.940	9919.082	10815.482	9764.847	8925.741	8565.415	10581.907	9791.885	10335.997	12043.679	10131.382	9374.190	5711.470	6263.506	8982.411	10585.807	9144.248	10313.468	9322.184
X603141705F1	252.1987	250.9663	581.7517	262.5417	399.0536	247.3845	371.9109	203.1211	819.4714	253.8132	NA	460.4415	194.4649	190.6455	369.1488	324.9629	248.9998	339.0481	452.2392	400.3523	1354.3227	597.8696	497.5852	292.4016	324.7099	523.2523	471.8403	311.1565	482.0156	299.2235	394.2750	344.3177	271.2049	204.6204	289.9087	369.5642	479.4045	278.0767	390.1376
X603141706F1	1715.4775	1619.9253	883.5328	1564.0819	1448.8118	1040.8949	1130.5576	1211.3010	2031.7423	1501.1257	790.0016	1120.4003	1669.5346	1415.5008	1502.0389	1060.2708	1408.6496	1105.1972	1291.1057	1253.2143	1541.1878	1174.5607	1062.8744	831.2677	1347.3802	1400.6801	1281.7678	1419.7761	1386.0880	1413.2193	873.3638	1366.2210	1386.7505	1283.2073	1660.7841	1368.2947	1101.0562	1772.7964	843.8897
X603141707F1	697.1607	1358.5454	1793.5825	672.0451	888.8696	1652.3542	1524.1421	656.6924	797.0207	728.1166	1771.4054	1181.2338	540.8465	489.9699	1042.7524	1299.9588	642.6379	1795.3000	875.4349	831.6676	861.1419	844.7551	1521.4575	1584.2858	990.9774	1185.4969	1076.5062	1182.4848	879.8847	1034.2293	1241.0234	914.4190	748.9269	557.8190	801.2890	1123.7318	932.1228	815.5139	713.2507
X603141708F1	3278.415	3154.207	3472.332	2882.338	2939.990	4020.593	3354.703	4291.534	3071.886	3243.925	2622.521	3502.088	3075.460	1779.120	2465.070	3061.740	3103.133	3579.480	3489.626	2876.043	3064.743	3638.619	3776.693	4128.566	4468.133	3593.035	4372.973	3033.312	3494.545	4209.089	3151.746	3223.719	4664.591	4570.603	2951.232	3977.549	2775.773	2986.554	2973.613
X603141709F1	44.3697030	81.3749361	82.0337747	43.7150355	58.9211130	51.2103100	31.3360526	47.8156197	2770.8645569	9.7786865	36.1568662	92.5633427	41.2476978	0.6890824	130.2387141	97.4468197	12.0145827	83.4218395	345.6508979	132.9267012	3024.3200123	41.3467779	67.3506550	27.2944569	129.6246350	86.5526023	90.7382842	64.0985523	46.7281961	386.0702688	71.6308199	81.2203008	2.7573046	2.2867042	130.7550438	115.2222067	41.7313637	53.6461427	61.6640119
X603141710F1	115.29065	45.65093	50.58688	45.31560	49.10803	44.13696	42.72394	121.60293	53.39977	78.56671	47.29836	59.74813	106.04134	150.37945	68.27387	48.82531	85.16778	29.52751	31.76040	41.98469	37.13542	79.52120	66.81853	52.85939	37.65840	36.71024	44.80042	36.81989	61.44549	49.05984	56.70498	61.44549	242.59393	94.17511	33.23777	50.83277	46.20567	48.12728	60.68275
X603141711F1	1273.9161	1150.5869	1553.5119	1810.8318	1186.2345	1344.8674	842.7661	2101.9691	1383.9855	1494.0167	1194.6283	1270.8943	2339.8886	2616.3389	1128.3323	1203.6922	1558.3817	1046.4796	1231.1747	1493.0399	1674.5270	1375.2078	1080.6830	1314.9529	1731.6230	1317.8956	1017.6804	1735.9191	984.9396	1156.8499	1305.2661	1105.8798	2014.4557	1304.0594	1529.9893	1318.7722	1197.1034	1102.5571	1611.5822
X603141712F1	342.563176	233.176601	948.946423	284.128725	330.124862	258.584395	343.829802	2901.727239	1498.211308	526.589693	497.626600	209.935072	1856.411729	362.622564	-2.357848	58.414596	657.021917	438.128916	212.322567	265.178198	1628.974675	1433.569380	73.934370	35.970571	321.093349	2004.670326	836.266600	956.444811	385.777304	1018.995919	69.186228	361.961442	483.064802	355.329589	179.755369	263.293901	1158.156030	320.039118	1958.858885
X603141713F1	2341.6432	1524.9159	1808.8170	1898.4746	830.3330	1544.2559	955.0179	1520.9747	1486.4041	2464.9737	1809.7112	1294.7340	2025.1265	2020.1272	963.2917	1472.1229	2369.3649	1638.4683	1207.0197	1086.2436	1337.6735	1065.1385	1345.8848	645.5226	1031.1577	1207.1318	1603.1024	1258.6734	838.5387	1047.8308	1403.3134	885.9676	1899.9237	1836.4782	799.4349	1312.9265	1073.4129	685.6555	1056.5671
X603141714F1	3851.6703	1823.9299	1652.6654	3288.7743	741.5384	1533.4299	2399.4644	1355.6750	375.0569	3594.8463	2431.9722	764.6251	1728.5749	2366.7936	763.9352	1120.0646	3155.3281	1558.1052	856.4052	645.7078	774.2304	507.1224	1062.0253	2664.8574	802.7424	1166.5746	1026.9258	907.6531	423.8516	579.2388	1056.7534	449.7674	3069.4187	4697.3103	723.9071	765.2954	632.6916	540.2353	500.4747
X603141715F1	161.11028	238.76399	354.61577	168.96468	606.72086	309.45155	290.50508	169.99347	368.86245	178.41495	197.03995	353.78462	98.33302	94.50222	629.33829	469.51046	118.02586	379.02725	380.24520	554.11910	415.45312	516.30976	499.48860	187.03735	396.21278	306.32999	463.94008	389.82115	520.05939	448.83512	427.86057	525.96191	55.15265	95.65183	445.70103	515.75002	683.30232	547.56811	380.26619
X603141716F1	14269.89	15823.52	16760.14	12940.86	18997.11	16657.14	16600.31	12415.56	16553.07	14860.12	15404.08	15564.75	14226.05	18520.41	17012.88	17718.93	12208.45	17129.22	17345.37	19407.51	18475.34	15760.96	15284.93	13364.39	17150.60	16195.09	15726.79	18724.17	16748.33	14867.81	18611.20	17132.78	10449.84	10925.61	20455.97	19417.92	17046.49	16628.60	19429.85
X603141717F1	3068.805	1862.490	3080.698	3307.660	2463.045	2074.807	2436.706	2267.927	2482.928	3634.844	2694.398	2434.473	3257.661	3177.887	2134.278	2762.888	2920.316	2464.754	2327.759	2769.115	2685.278	1828.509	2138.554	1831.593	2367.446	2546.457	2446.977	2851.141	2390.916	1141.900	2189.841	1787.822	2033.505	2195.201	2559.182	1402.596	1554.859	1791.136	2231.122
X603141718F1	20998.58	26096.28	26617.49	20316.74	31586.55	27218.53	27611.71	20367.22	32576.11	20951.16	37109.07	31395.60	18891.93	21663.96	28039.36	27889.32	19912.56	26229.84	28927.75	33045.37	31036.54	27437.60	29380.03	23526.66	29117.60	28490.94	26412.92	28892.80	29786.72	30550.34	24371.90	29566.33	16750.74	16682.65	31243.35	29236.60	28302.91	32673.03	32137.67
X603141719F1	6131.286	7081.260	9058.875	5786.404	7676.147	9331.967	9096.467	6713.314	10522.976	6470.762	7334.486	10102.906	8302.110	8340.178	8018.869	10494.657	5204.794	7776.201	7324.916	10269.650	8774.191	7421.314	9651.858	7979.423	12153.757	8834.216	8276.313	7264.661	10831.023	7452.740	8331.362	10974.172	5682.243	5296.919	5467.894	9973.640	10033.075	9781.208	10921.414
X603141720F1	3107.6444	2509.5626	3011.9200	1994.8218	2322.2957	1820.3958	2303.3825	2288.4834	10456.7834	2520.1055	1620.3976	3710.5784	1800.2043	831.6974	3393.5303	1755.9814	2105.3443	2402.8561	4509.9757	2314.2836	13622.8566	3843.5106	3053.9882	1952.2324	2529.7702	3810.1777	3274.7189	2602.2467	3791.6065	6310.8146	2561.3332	2229.7921	2737.1969	2500.6628	2041.7950	2842.2375	2788.4435	1929.7593	2232.4395
X603141721F1	574.9962	1130.8802	1546.6985	845.1441	1757.5444	1045.2138	1342.3532	695.5423	2873.4984	748.3179	963.2660	1324.9704	467.5142	498.3626	1578.9380	1471.5975	476.0290	1283.8418	1568.3243	1940.6359	1269.0117	1739.5500	1634.4991	1017.2238	1491.6924	1470.7396	1245.6944	1690.3222	2147.5311	1535.4076	1206.7917	1735.1977	281.6970	272.3645	1843.9173	1538.6331	2119.5791	1653.8385	2175.0793
X603141722F1	108.440944	252.015869	186.406306	389.379592	380.604232	131.333404	103.949562	184.712396	2341.241105	-17.799642	32.395656	92.727439	754.248879	17.391294	396.262337	169.203630	5.651892	137.868311	308.209039	299.642047	856.373315	174.769436	129.111513	-1.337402	209.808575	514.382642	92.299078	185.743217	204.421836	2183.078385	162.181033	340.069372	75.716052	-13.979500	836.721651	181.929953	196.772987	775.624367	446.715014
X603141723F1	49.88114	124.32123	81.97704	237.95117	345.22674	140.09894	135.45149	163.93987	420.99531	74.48554	195.05273	196.66683	454.06473	78.72163	228.43539	157.26962	83.60021	97.97736	106.73879	76.47823	517.54279	158.56881	156.42710	95.44613	60.15511	126.29859	106.25442	102.94425	129.63789	487.36736	82.55726	171.89350	108.14970	39.64189	292.95702	121.49166	118.31355	405.16435	130.97030
X603141725F1	5585.388	4604.995	5132.888	5642.174	4005.753	4578.780	3688.815	5301.204	3673.887	4249.771	3981.023	3957.411	5763.153	4322.328	4380.601	4936.922	5779.129	5076.398	4389.992	4269.956	4550.185	4417.910	4165.387	4065.437	5005.937	4005.384	4385.135	4497.832	4988.839	3787.401	4379.785	4887.848	6381.256	5448.139	4540.514	3983.615	3264.489	3207.536	4085.757
X603141727F1	1530.403	1794.000	2151.034	2012.245	1409.735	1803.325	1427.328	2460.364	1987.067	1672.083	1990.116	1665.941	2606.817	1630.044	1310.348	1818.035	2166.587	1724.137	1902.550	1595.720	1580.976	1787.506	1566.734	2073.427	1892.964	2027.056	1641.700	1631.868	1335.878	1473.288	2029.206	1577.551	1986.861	1583.815	1629.970	1979.623	1599.692	1506.715	1862.697
X603141729F1	9089.758	8297.015	11822.049	7680.031	9341.449	8362.008	9823.082	9724.894	12153.040	8507.875	8640.426	11810.465	10159.147	7416.282	8579.803	9330.774	9328.148	8979.685	8977.361	10684.189	11364.066	15358.103	9256.925	8063.629	11425.459	12662.216	9394.077	9469.360	10962.096	12145.354	9351.478	9292.100	10375.088	8776.733	7323.513	8311.785	7488.902	6354.694	10201.046
X603141730F1	1965.255	2772.012	3585.380	2165.508	3369.481	3566.621	2841.925	2276.845	2903.986	1697.573	2277.492	2977.077	2814.370	2666.054	2920.158	3101.634	2033.867	2985.801	3210.158	3522.248	3912.185	3260.366	2930.829	2415.916	3475.462	3470.080	2671.889	2673.294	2677.989	3954.883	3329.442	2700.984	1498.925	1820.489	3250.864	3604.617	3396.744	2636.983	3445.562
X603141731F1	317.9030	278.9636	581.4025	457.5491	616.1047	314.3138	415.1973	332.4424	923.7255	213.8869	369.0023	338.7178	388.0804	710.3361	439.5175	369.7612	339.0487	268.4635	314.5219	613.0639	620.7046	623.1066	394.7352	255.7548	454.0755	307.3691	327.2733	743.7551	388.3666	410.8971	286.1340	485.9234	440.7570	423.1986	335.3638	350.7099	598.2436	422.6812	492.0875
X603141732F1	4963.343	7397.250	8486.027	5573.157	7686.097	7203.700	6660.374	4963.343	7382.152	4585.969	5600.107	5511.602	4189.074	4873.185	7900.416	7577.889	4650.812	6656.384	5679.598	8088.779	6089.826	6782.231	7119.543	7204.561	7479.856	6883.841	6137.151	7824.697	7568.920	6548.363	7709.432	6815.867	3806.222	4285.477	7917.110	7000.927	6162.641	7439.109	7209.575
X603141733F1	19605.13	20590.39	20401.77	19458.59	22429.75	20166.00	16930.78	18674.75	20681.38	19692.19	19013.21	20141.79	20018.12	22343.43	20094.54	19467.00	17667.60	20770.22	21300.38	24621.17	21938.31	20843.54	19290.89	17540.08	23606.26	20527.84	18855.00	22252.92	21549.45	19126.10	20697.39	20528.96	18200.40	16569.27	23479.44	22265.01	20925.40	20186.12	21997.61
X603141734F1	412.6576	1211.8070	1025.5859	470.4072	841.3140	967.6673	2291.4973	440.3984	992.2237	187.9122	702.2154	725.0937	420.8905	288.2241	775.1558	824.2512	165.5287	1457.2062	664.2093	1066.8667	786.8603	1024.3274	861.7761	2215.9699	867.6060	519.6212	915.8100	919.6657	993.9105	793.0663	713.9033	923.7057	292.8245	639.8495	591.2685	863.7969	1158.4140	763.1211	1120.4446
X603141735F1	3363.662	3684.311	2763.382	2652.365	3936.084	3787.143	3939.827	2968.333	2534.126	2685.580	4250.261	4439.922	2934.571	3558.990	3286.783	4591.271	3167.166	3626.182	3914.084	3471.709	3857.271	3480.672	3905.589	3189.011	2714.381	3518.558	4266.555	5142.446	3957.947	3674.523	4634.003	3669.832	2803.197	3124.381	3895.641	3540.953	3723.450	3048.604	3496.306
X603141736F1	2532.988	1912.525	2166.384	4435.062	4418.176	2828.101	2020.985	3039.495	2292.727	4256.889	1648.938	2645.064	5415.835	5508.470	2516.687	2792.124	3083.019	1487.084	2562.625	2932.462	2202.142	2086.138	2566.151	2113.056	2711.916	2085.083	1617.302	2472.693	1954.014	3344.054	2120.206	2029.811	2707.780	2760.232	3787.281	3465.097	2760.760	5354.637	3479.242
X603141737F1	27840.09	34929.62	38099.41	27114.63	30714.83	35151.10	34154.08	29624.03	32895.50	26989.91	29990.53	31910.52	28421.04	30515.84	32042.50	35964.90	26462.95	35834.53	36799.27	35818.79	29868.97	35280.81	34616.27	33765.88	33214.06	37582.56	32548.59	34285.17	33630.05	31420.03	36452.79	40084.13	28285.94	28595.88	35944.42	30600.51	32213.72	30321.59	35944.42
X603141738F1	107.41006	227.02219	306.18146	195.16996	174.80834	211.91672	116.67373	206.47675	239.02736	124.95160	153.83331	182.10553	221.41304	66.51789	174.91987	275.18788	156.99520	206.07304	205.60828	225.32548	188.22242	222.74061	264.09650	109.60361	312.77396	268.00967	170.32485	238.36136	166.07485	162.88628	219.57083	216.09228	102.96336	78.02129	214.17518	228.50744	176.65957	218.25356	193.05133
X603141739F1	7846.936	6612.356	7593.282	7664.378	6213.746	8862.959	6030.518	7617.465	7563.406	7408.974	6326.559	7113.282	8935.465	7975.238	5588.692	8128.191	8312.808	6840.690	7055.048	7878.824	6810.025	6176.467	9471.099	8173.971	6726.988	7651.579	5905.180	6583.278	6595.500	5388.925	7578.195	7120.230	7653.482	6501.390	6258.092	6668.227	4810.371	4731.752	6958.593
X603141741F1	89.43372	48.51398	67.19058	48.49067	64.48300	88.33523	52.46438	75.85856	53.58920	82.54452	52.75053	60.04143	42.54910	124.04932	92.34124	58.28367	80.65235	49.12446	57.46392	71.35346	49.99282	79.65502	58.63764	76.46445	45.81360	61.20132	72.48140	57.38112	78.76592	62.09568	49.00417	69.32687	139.05648	148.76134	46.89040	74.50575	76.42861	70.65517	73.69194
X603141742F1	29223.35	23522.28	25070.80	27603.87	21533.03	24341.48	29262.28	29363.32	19810.19	28449.96	25339.53	23319.40	30370.84	32134.68	21971.36	22718.69	28612.91	27815.35	23440.10	22129.19	22744.33	22207.87	21610.66	29138.30	22141.43	26793.69	24306.91	22638.30	21982.25	16421.90	25674.70	25849.50	34817.21	34299.10	23845.07	21015.72	23880.14	14625.80	22587.61
X603141743F1	1349.8517	317.6510	520.7995	266.0764	409.8935	490.8885	801.9593	415.0637	201.0756	1481.6027	627.9072	210.2615	447.3147	1273.4142	381.5145	241.0548	541.8012	311.2783	414.2676	332.5686	870.3699	331.4521	257.2450	891.3654	202.8960	193.6445	394.8176	270.4970	322.6429	498.4816	217.8429	257.6110	871.3310	1284.9484	241.4234	287.7985	249.4639	238.0624	215.9546
X603141744F1	411.45707	933.91317	1172.91611	501.96550	536.35963	738.79965	800.99086	651.20545	650.29572	446.27702	1031.83694	590.75922	342.02296	69.33201	769.48004	810.36202	505.37429	1087.13707	780.04549	563.85330	665.08359	631.36135	633.41728	892.92808	785.19158	1048.56706	962.05407	625.38448	540.95184	662.83403	867.29888	569.85544	286.93442	492.55290	712.15550	722.19508	536.84081	634.89890	598.47616
X603141745F1	4426.428	4605.623	5672.771	4599.977	4384.093	5116.715	4442.311	4516.163	3282.705	5041.256	4850.099	3791.489	5200.778	5934.595	3652.127	4048.454	4684.267	5159.320	3110.698	4449.119	4982.518	3239.442	4032.082	4562.741	4199.917	4797.371	4572.999	4460.170	3554.150	3386.783	4350.408	2513.700	5275.254	4490.780	4135.785	4283.544	3042.475	2610.457	2809.121
X603141746F1	2568.238	2570.037	2920.171	3531.803	3005.298	3060.672	2369.978	3717.737	3137.238	2961.288	2863.800	2738.344	4168.035	4056.097	2499.567	2788.690	3410.409	2553.859	2064.549	3080.431	2630.289	2647.889	2959.343	2908.697	2752.647	2329.793	2642.682	2703.961	2902.041	2781.291	2592.369	2602.204	4084.814	4181.245	2534.173	3253.440	3164.649	2454.374	2927.412
X603141747F1	282.6958	441.5246	751.1311	339.8003	366.3983	649.4442	554.7988	1074.0955	1491.8479	617.1233	426.9089	919.1782	748.7600	3192.7906	208.7489	367.2885	228.0897	321.7942	369.4936	1254.2361	1019.1325	580.3780	371.0521	1038.6878	2647.8556	405.6800	349.6055	2545.7163	611.7006	511.6073	469.7491	377.4363	294.1235	151.6671	571.9979	379.5571	480.2135	430.3358	1482.0002
X603141748F1	4788.960	2851.363	3732.372	5663.619	2536.850	3177.976	3005.706	5383.351	2882.410	5126.923	3426.157	3140.333	6224.662	7487.448	2741.809	2931.905	4948.060	2621.525	2650.030	2747.972	3646.331	2682.750	2867.554	3581.340	3195.492	3084.171	2427.243	3698.860	2206.463	2960.396	2986.537	2211.080	5645.725	5601.834	2878.169	2949.965	2556.413	2539.384	3345.953
X603141749F1	9780.591	14744.951	15240.767	10310.257	14686.819	13616.221	13536.268	10068.232	16842.209	7770.328	12393.686	14310.304	11147.391	8021.102	13775.024	13519.264	9132.409	14967.659	12240.071	13302.535	12623.430	13650.455	16245.163	13722.375	13449.143	14434.064	13197.775	12586.294	12774.555	17132.060	13493.544	14078.678	9178.272	9330.848	12683.945	15301.537	14413.688	13862.840	14232.587
X603141750F1	21.50499	64.80413	39.58694	33.50026	40.90813	76.33438	49.73467	49.67952	45.94828	21.89717	52.62646	57.36383	20.09960	34.81953	52.49502	63.40104	41.01767	71.20977	68.96950	26.94589	48.84779	35.95925	55.05017	76.83355	63.82022	56.99836	57.52022	45.10274	39.52924	44.27226	100.41823	54.04442	25.57770	17.31780	47.82165	51.43344	49.42911	43.71204	27.71368
X603141751F1	5316.153	7632.660	7896.014	6322.562	6358.582	7771.227	7797.624	6239.716	5821.861	5081.139	9474.546	6979.274	7692.811	6721.957	6511.016	7702.779	6106.164	6660.748	6178.811	5855.916	6653.978	5993.302	7288.411	7867.843	7933.715	6583.457	6056.044	6880.835	6701.801	6568.003	6539.174	6135.444	6808.233	7527.691	5993.018	6770.605	5022.906	5487.703	6279.700
X603141752F1	71.05576	80.20956	87.39843	413.77748	62.93037	94.59171	58.26609	473.35443	58.95569	495.25259	106.06120	42.74364	215.27866	75.36349	99.06445	93.25433	263.31653	100.60217	28.71272	68.80580	79.27534	34.58498	55.26379	206.05273	62.40415	38.39555	58.48381	37.02470	59.04003	100.72128	97.89800	78.00195	111.49157	51.47869	86.42727	95.80972	59.74834	64.80892	69.48803
X603141753F1	374.38503	62.89957	87.97799	326.83971	42.39215	78.67624	90.78355	206.63445	48.55757	624.62003	90.52125	57.57901	224.04916	294.01775	80.32336	79.90608	544.76152	83.69167	80.30235	75.01533	57.91661	66.41055	49.99647	87.53531	67.54089	88.71793	64.44391	82.80554	78.07130	53.08594	77.83916	70.55383	208.78086	203.90645	69.13541	71.10875	75.99981	71.69229	84.18051
X603141754F1	866.1848	701.4135	1085.6431	1060.0354	876.4160	797.3522	614.2143	1143.8081	621.7547	1084.2730	876.2032	671.7145	1384.8816	893.4784	675.4244	717.2453	881.7698	697.9902	719.0808	769.3751	726.2022	852.4173	816.9383	634.9747	999.4050	900.5226	701.7266	651.3027	686.7006	551.3200	741.0641	722.6927	959.7128	1228.9997	792.0872	735.7076	728.6264	664.1193	940.4723
X603141755F1	61.29010	16.96230	46.79614	39.76056	23.24148	29.40302	32.43699	60.53960	11.70443	37.45900	44.13918	23.69438	63.23035	63.59449	22.36881	39.29737	45.66119	17.51496	16.38554	20.31069	24.43004	18.83762	18.84121	28.83343	26.71267	20.07259	16.38758	25.72483	20.17270	16.35564	31.15907	15.23836	92.32897	168.43466	31.29327	21.97350	14.66263	18.31656	18.35229
X603141756F1	48.200375	230.070140	394.225270	89.333024	159.656561	235.397066	142.169657	85.906261	164.073403	15.453719	249.659362	208.528064	38.050921	-2.186874	199.415033	268.947970	31.111821	275.014765	165.567910	243.574975	155.826137	171.878924	238.777136	177.125864	247.647587	264.175153	164.006875	205.614482	140.525567	158.762776	268.893335	142.339891	2.449026	10.640472	200.890182	215.232233	183.470970	182.372913	203.476500
X603141757F1	622.67926	50.66885	60.51446	224.73175	112.63452	60.45575	49.60362	126.02718	44.04143	243.41663	68.28437	66.09941	192.89653	890.78986	51.67214	63.92420	188.10389	47.71590	47.31756	80.81542	64.85920	91.99922	68.65254	54.07537	53.74163	66.25704	42.79356	72.70579	64.06812	66.49612	62.51133	61.58953	415.64922	761.69109	40.30838	73.79365	62.87239	72.83000	67.46647
X603141758F1	402.3048	469.3557	822.5533	439.1706	1430.9873	370.0709	684.2793	333.3624	733.3699	429.6712	2640.8797	603.4034	368.1594	880.5262	594.4969	597.3624	269.1871	477.3681	575.8199	914.1102	650.9942	551.2379	663.2183	330.4237	779.1052	616.4814	576.7359	1105.0348	639.4879	820.8395	488.3990	634.5699	373.8671	147.3572	764.2844	619.0212	1056.7153	864.4702	882.3998
X603141759F1	2392.914	2171.909	3421.662	2879.104	3233.728	3214.784	2742.018	2544.328	3734.122	2370.982	2832.944	3151.975	2858.293	2884.417	3393.577	3136.781	2470.166	2487.983	3162.347	3563.868	2390.037	3257.113	4087.350	2556.403	3139.490	3537.772	2782.220	2935.652	3110.573	3152.715	2963.745	2952.503	1990.452	2176.759	2910.532	3599.955	3820.729	2959.130	3197.561
X603141760F1	651.11584	844.90551	990.72293	679.50379	797.03437	918.74060	647.70208	713.26223	639.04674	604.98530	846.15274	854.84891	632.88481	70.59635	499.57948	748.53794	514.18398	1047.00475	732.37956	775.88326	688.34078	638.95392	870.32055	784.32067	787.25029	873.76506	871.16357	620.19386	541.05528	681.02045	834.79374	806.08218	432.86866	538.14486	624.53186	881.61723	582.99913	606.40828	669.50126
X603141761F1	120.07551	163.68241	206.15739	151.14855	137.45115	197.37445	158.61941	186.67438	206.54090	99.60541	189.99616	141.63010	178.61757	122.14056	151.11880	148.15953	129.72547	134.43701	161.74879	150.87256	156.00597	166.17310	232.67930	193.01182	175.20298	191.98373	159.95521	169.39645	134.27518	158.36689	229.85955	155.83342	165.78244	141.56851	148.87500	170.15907	141.79628	157.21468	170.01774
X603141762F1	8129.476	10247.989	11156.960	11830.564	9367.086	10678.898	9517.404	10025.296	6482.813	10972.450	11742.665	6823.266	10766.103	8914.167	7435.102	9736.896	11267.545	9747.379	9439.800	9543.801	10103.256	4861.643	9689.011	9463.522	10466.039	11200.976	8624.437	9909.383	5046.475	5444.050	10020.289	3860.433	9605.955	8415.065	11116.995	8679.248	5106.419	5490.811	6856.822
X603141763F1	4334.086	2541.884	2464.226	4498.004	2407.153	3003.268	1739.881	4261.654	1447.034	5482.200	2511.020	1901.888	5360.776	5655.756	1786.084	2856.129	4878.412	2687.381	1737.117	2250.344	2526.228	1375.451	2127.691	2034.227	2383.427	2327.728	1903.635	2187.395	1242.025	1351.064	2652.957	1215.413	4090.321	3986.136	2448.989	1870.991	1335.524	1546.736	1921.467
X603141764F1	4560.001	6253.658	7045.563	4651.284	7203.597	6721.480	4892.833	4478.131	6406.570	4417.112	4586.527	6108.759	3870.725	4697.922	8535.042	7135.154	3781.753	5960.815	5755.310	7755.876	6636.946	6929.947	8365.260	5413.167	5691.132	7388.338	6279.986	5725.698	7146.250	5510.668	7337.952	6884.826	3544.170	3498.831	6109.909	7640.217	7369.601	6251.405	5714.144
X603141766F1	5031.677	5392.312	6236.974	5747.987	4711.152	6701.174	4410.792	5208.204	4491.821	5605.440	4215.152	6475.941	6873.297	6297.580	5956.555	6295.688	4483.225	4970.261	6245.209	6971.749	5683.252	4769.183	5378.136	5813.103	5576.950	5321.840	4844.471	6417.132	4402.410	3730.634	7148.515	5923.787	4627.080	4292.862	6229.511	5620.442	5521.077	4934.078	6022.320
X603141767F1	209.4423	295.5615	309.4670	442.6944	275.6322	274.1720	290.7170	166.2537	209.0284	317.6572	452.0398	311.7281	167.3579	135.4226	267.2958	372.4583	386.3641	364.1298	304.8494	291.6388	246.9765	212.9959	453.3733	327.6011	310.5421	322.4143	271.4455	265.1292	245.1945	252.8197	373.1410	241.3678	124.6646	352.6027	258.5442	309.2042	245.0033	210.6263	210.5274
X603141768F1	95.98220	75.91876	86.55179	105.28085	102.07521	87.08134	53.51472	53.38835	62.42399	114.93625	92.59556	76.12595	69.74058	121.87358	89.87475	72.52620	102.61636	55.34870	73.42110	87.64632	77.60548	82.45057	100.02726	115.48237	66.40581	76.35335	70.69914	79.47053	94.61037	64.00664	49.59452	50.19042	55.38126	104.69660	60.71111	78.49433	65.55850	74.25767	83.95223
X603141769F1	38.47295	155.53082	145.34203	112.12816	114.84211	75.10716	85.56348	74.14472	623.45034	49.09225	96.96300	264.65084	281.46273	39.51219	73.09460	61.55808	53.90025	158.66144	243.27652	132.17720	NA	85.63299	97.28796	161.40872	216.11628	161.36716	61.97353	94.37382	102.87442	78.21710	93.60251	205.76259	46.37637	40.97268	97.50344	92.64995	157.73031	76.94420	153.37480
X603141770F1	144.06230	76.54401	77.66072	95.98796	56.21907	87.30011	74.90899	96.36574	69.66485	82.29272	66.34676	72.89986	79.67831	126.55369	58.82591	57.10937	73.39727	81.63011	166.24873	49.40874	NA	39.28844	67.64291	73.64645	96.79240	62.58881	64.43957	48.12641	47.82909	61.59342	69.03982	58.48007	61.70133	70.77180	66.26650	76.75533	65.77004	48.61172	62.04536
X603141771F1	4414.498	4541.581	6218.761	3680.851	4411.104	6056.973	3931.706	4319.163	3567.544	5025.575	5801.666	3302.221	7019.591	5540.344	4364.890	3173.721	5513.239	3087.000	3740.671	3829.045	3265.934	5474.357	5024.400	3562.686	3802.210	4879.146	2783.640	4842.206	3898.506	4448.275	3141.711	3986.601	3883.918	3500.516	3690.028	3704.960	2895.624	3037.097	3547.646
X603141772F1	10877.139	11845.458	12834.572	10831.632	10537.016	12360.485	12689.757	11204.765	11329.403	10955.852	12555.130	9992.995	10686.666	11444.365	10589.449	10805.747	10708.434	12096.991	8939.535	10063.034	11479.543	10558.363	11616.053	13402.434	10816.728	11966.562	11281.710	10728.274	10837.064	10759.473	11620.891	9779.218	11217.659	11051.105	10669.237	11132.063	10706.315	10223.209	10156.120
X603141773F1	11467.191	9264.315	11034.186	12952.576	11354.466	12726.286	8456.325	11739.945	10766.557	12360.106	7875.565	9301.338	17158.688	13442.682	10055.167	11394.413	12426.031	10308.460	10688.041	12324.373	9887.878	10654.835	10402.203	8984.942	10189.034	10414.946	9513.885	9106.193	8119.155	10553.890	10758.763	10371.517	11931.986	10428.810	12410.001	10387.254	10440.323	10516.881	13052.599
X603141774F1	2861.691	1597.425	3982.790	2649.005	1569.205	2684.235	1776.089	3864.690	2990.863	2123.747	NA	2419.787	3460.262	1334.015	2107.180	1931.043	3958.757	2156.875	1978.469	2191.801	1570.287	2352.385	2985.663	2594.331	2388.194	2715.054	2363.539	2138.078	2090.347	1966.849	2179.743	2530.765	2425.256	2133.522	1819.355	2429.923	2489.719	1880.754	2705.040
X603141775F1	3591.978	5053.439	4823.735	3276.038	3472.630	4973.288	4916.820	3186.672	2630.466	4438.133	6741.040	3607.987	2513.552	2240.149	4010.100	4307.053	4174.792	4656.329	3169.641	3382.561	3886.287	3092.700	4056.102	4836.206	3798.496	3470.630	4271.823	3982.035	3366.645	3033.965	4427.769	2693.934	2356.660	2152.357	3068.740	3338.091	2987.508	2806.475	3039.935
X603141776F1	1469.604	1752.560	2129.364	2102.869	2103.995	1851.649	1648.724	1796.295	2115.125	1420.883	2029.719	1880.222	1770.308	1572.986	2389.483	1740.483	1879.404	1866.482	2015.322	1711.978	2340.404	2041.366	1801.377	1684.373	2001.847	2011.501	1761.100	2089.831	1727.284	2084.485	1792.424	2200.054	1586.368	1901.096	2060.596	2082.453	2456.603	2350.270	2141.027
X603141777F1	14994.69	13953.90	14370.65	16137.36	14698.02	14868.81	13200.41	16512.27	14333.53	15122.89	14787.56	13109.45	18475.30	18976.12	14070.71	14187.55	17164.94	14586.46	13485.94	14445.05	14992.57	13448.76	13988.90	13178.48	14251.66	13951.34	12611.33	13603.28	12334.48	12465.00	13924.79	13271.53	16056.52	15422.91	14602.85	13949.87	12361.21	13451.46	15023.86
X603141779F1	2892.181	3441.065	3800.858	2752.161	2436.512	2935.291	3639.578	3053.702	2616.581	3091.458	4408.166	2696.926	3345.775	3162.457	2922.515	2859.093	3153.048	2814.760	2630.370	2513.563	2995.405	2338.943	2872.744	3316.790	2723.941	3098.621	2806.860	3027.062	2523.968	2570.957	3072.565	2109.180	3126.975	2597.444	2268.370	2992.389	2354.764	2177.735	2471.733
X603141780F1	20717.30	24703.69	24547.77	17942.99	20126.62	23150.40	22418.55	21842.86	17669.91	27858.01	19464.53	22248.34	19291.13	19210.82	20179.78	19854.28	20373.69	23385.36	21119.73	21380.23	20049.73	18586.09	22611.93	26176.06	20929.57	22488.87	20748.72	19668.71	21762.83	22564.03	21103.17	19584.79	17446.53	19221.95	19951.04	19311.87	19296.23	20657.67	19636.51
X603141781F1	65.74876	104.62946	665.82575	217.04591	182.02878	75.28062	370.16743	492.21417	343.16737	207.48016	254.00685	162.37784	187.99064	343.77616	20.00783	105.55752	48.70790	184.22563	45.85107	454.46960	200.23271	169.19261	86.75262	109.71956	708.45444	209.05176	49.03166	896.36355	260.92275	181.67627	136.97159	178.87354	60.09044	21.49788	303.55707	69.68818	580.14964	286.85871	592.17849
X603141782F1	38.592460	61.380235	94.256814	53.802212	46.721105	93.151055	55.302631	73.757955	NA	30.006044	54.231629	63.444352	58.380918	10.945346	14.869231	80.395579	18.762801	61.064880	64.335054	106.836803	453.611831	86.411286	61.175359	20.616286	96.321373	253.807209	71.068200	340.508444	50.784420	303.690427	114.033691	57.979152	5.615819	3.839266	49.675994	35.130242	74.063794	36.154461	105.863781
X603141783F1	17.279983	12.928465	17.716390	13.117009	9.657228	13.692544	14.233371	14.802141	8.518903	12.278683	14.019654	12.154541	16.778772	20.431695	8.271889	12.534014	16.017742	12.247523	16.063886	9.589923	21.844100	10.269580	9.526611	10.190887	17.705325	22.741379	11.946049	14.702090	14.218818	12.082695	11.577095	10.171735	15.636880	18.506247	12.938990	10.064165	9.417652	9.126101	10.263825
X603141784F1	373.3493	404.3723	472.0321	706.5945	346.2965	285.3704	312.0812	677.6091	364.5192	697.1916	267.0600	364.3687	483.1996	227.9793	389.1656	347.5467	673.6914	508.7252	546.7025	349.9229	267.6190	470.3537	244.8187	291.1422	359.0142	487.5998	387.7572	327.8006	398.1575	271.4091	403.7278	471.0763	778.3743	419.1742	528.3919	338.9801	305.1089	406.6863	370.3028
X603141785F1	54.32306	155.83327	94.33527	63.55435	97.15584	167.52146	124.21395	80.43389	47.23338	48.17873	38.85471	70.37272	67.41912	49.03270	126.79549	114.55483	32.62440	109.06772	158.83058	43.70375	123.66191	122.72860	112.63925	115.40337	75.25151	100.80625	197.27387	164.76785	128.01256	111.59162	136.77669	59.63099	56.92805	91.89011	155.83720	99.79913	76.57903	109.38153	67.80706
X603141786F1	4265.618	3128.514	3718.906	4605.546	2800.869	4970.313	2377.973	4376.125	2384.302	5269.788	8069.776	2536.650	5440.520	7309.786	2662.009	3148.269	4507.774	3214.214	2281.655	2607.781	3078.461	2080.909	2924.796	2552.661	2758.686	2750.326	2429.582	3055.431	1853.369	2052.100	2758.448	2110.628	3818.274	4053.986	3081.730	2719.497	2686.240	2665.240	2305.636
X603141787F1	2320.8241	2050.2047	2415.0739	1713.1351	1664.0081	1659.8110	1840.1773	2125.5086	4642.6516	1912.5423	1566.6330	3063.7913	1914.7638	893.6053	2710.1164	1201.7894	1803.2546	1707.9209	3082.3267	1632.5860	5125.9816	2682.3307	2254.8034	1890.5648	1786.7597	2520.9030	2087.4488	1835.7682	2508.9504	3726.0618	1811.3106	1894.1015	3000.2049	1598.1226	1400.6519	2247.9766	2493.8811	1725.6279	1936.3701
X603141788F1	4139.0760	2520.1360	3086.7434	1621.3614	3912.7574	2668.9163	2897.5445	2052.5847	1271.8585	4212.3032	3167.8694	4069.4154	1761.7259	974.8604	1493.7648	2299.7018	2387.0037	3325.3034	2817.8416	2666.3501	899.0662	2763.3174	2743.3430	3023.2244	2387.9965	3644.6705	4982.7795	1751.5099	3457.1293	5029.4481	2206.4549	2433.9822	3712.8535	3881.7916	1078.9766	4205.0913	3525.0956	3085.2332	1473.7987
X603141789F1	132.32986	51.61257	56.95409	82.36871	47.63938	59.29959	63.71425	79.18903	54.91013	107.14934	59.27767	68.73222	105.42885	137.37253	57.89966	52.30332	92.97096	60.42221	67.74201	48.76523	63.54932	66.08550	50.78965	59.30074	77.67418	56.18101	54.92994	60.12956	69.47368	59.21799	50.04799	71.66338	103.07919	168.37244	54.73307	67.15067	80.23723	68.88716	59.91987
X603141790F1	7784.780	10421.266	12972.155	8040.599	14375.456	11600.979	10572.469	8951.732	14887.642	7091.240	9451.408	13084.796	9337.509	8106.572	11338.810	12645.187	5515.790	11314.989	12328.557	13091.705	12377.428	12538.481	13918.451	11489.188	13254.492	13747.510	11879.173	12592.396	11966.116	12762.166	12093.205	12980.045	7559.549	7488.020	14779.871	13614.481	14884.457	14014.132	15524.988
X603141791F1	870.8182	1620.7301	1836.3478	1255.6530	1471.3594	1904.3129	1432.8995	1394.4602	1910.0737	970.2792	1646.8873	1479.5263	1887.0147	1986.6798	1745.9134	1410.2704	976.9695	1320.5980	1124.2150	1731.4934	1616.6537	1157.4264	1865.4213	1734.2005	2280.2718	1787.1181	1417.1486	1778.7625	1686.1020	1555.0502	1587.6508	1430.6239	1442.4184	1064.8669	1071.9074	1498.4410	1300.6000	1240.1658	1913.8508
X603141792F1	1215.014	1410.685	1634.251	1222.161	2477.733	2207.009	2212.956	1051.021	1882.832	1031.311	1587.343	1533.683	889.745	2036.663	2240.775	1850.090	1097.703	1378.052	1085.732	1738.541	2438.157	2130.409	2151.815	1663.470	1000.363	1503.081	1930.618	1407.461	2126.504	3117.476	1635.930	1370.033	1624.992	1404.461	1788.909	1982.142	2153.365	2194.097	1817.393
X603141793F1	923.4800	761.5606	987.6205	786.8629	908.5329	1155.1283	749.6596	899.0690	947.6158	836.0026	654.7407	831.1768	1254.5780	1288.3151	819.4195	896.4914	765.5677	785.3426	749.2529	1015.0929	883.8349	977.4456	971.6062	820.1123	827.4933	884.4356	720.5980	788.8384	810.9675	735.0926	854.2796	958.1731	922.7917	1042.8003	944.5849	971.0079	1037.6393	862.0430	942.2952
X603141794F1	1481.793	1358.726	1656.164	1520.826	1654.056	1771.747	1099.450	1494.637	1638.421	1471.930	1149.770	1383.994	1326.645	1361.589	1520.772	1475.767	1397.488	1584.689	1792.382	1703.299	1621.835	1503.183	1712.108	1356.050	1704.551	2043.785	1335.492	1507.774	1244.713	1209.989	1492.388	1271.781	2019.493	1300.388	1643.500	1678.532	1611.945	1397.284	1755.732
X603141795F1	21407.14	27072.24	27920.96	21259.75	23938.92	25364.75	30396.43	22509.35	26332.87	21705.46	26724.04	26840.74	22801.43	20582.84	26705.12	26110.80	21646.64	27671.30	21585.18	20510.09	24389.15	26809.33	26972.81	28786.50	24798.80	26762.14	26543.84	22594.85	24721.28	24280.85	24154.51	23504.60	22967.92	19255.64	23035.07	29505.04	24638.80	20843.03	25037.59
X603141801F1	2332.468	2379.431	3273.729	2115.072	2241.771	2723.411	2151.454	2125.073	2381.127	1972.940	2988.754	2178.795	2592.276	2383.768	2126.012	2346.534	2419.177	2602.383	2249.137	1950.346	2626.172	2079.245	2857.637	2237.718	2463.153	2920.620	1816.647	2456.966	1731.687	1909.484	2330.675	1664.782	2052.286	1836.023	2062.442	2338.253	1958.930	1724.692	2566.036
X603141802F1	11714.010	9225.368	10483.465	10654.954	11904.228	9854.461	9328.287	8266.735	12787.049	10803.037	8962.256	10118.107	8407.641	12002.947	11231.152	11474.311	9408.873	9597.960	9893.504	13318.598	10424.626	11580.103	11306.160	8462.751	12048.907	7969.106	9441.904	12356.474	11738.098	9679.878	10263.938	11907.230	7738.332	10235.284	10701.889	12944.054	11029.656	10111.731	11733.679
X603141803F1	1340.677	1337.529	1462.724	1611.302	1628.392	1373.060	1112.020	1637.709	1964.601	1313.834	1571.971	1477.337	2502.027	1805.243	1169.511	1382.375	1333.469	1354.624	1142.026	1664.543	1505.183	1628.594	1747.965	1215.374	1677.169	1591.215	1427.749	1537.736	1080.708	1270.950	1551.227	1260.411	1142.836	1226.880	1518.686	1645.007	1512.846	1440.636	1648.976
X603141804F1	10182.328	10426.150	12683.865	11492.620	9827.284	8686.608	11405.978	11989.424	11752.162	9902.754	9882.079	11191.300	13608.018	9207.933	11067.994	11122.042	10162.962	10571.261	9427.961	9985.525	10067.648	12924.318	10642.136	10290.595	9620.028	13107.848	11071.176	10090.468	10905.704	10476.895	10011.828	11766.938	11112.229	11759.902	9918.307	11126.738	12527.374	11663.173	12667.619
X603141805F1	1317.1691	1426.3289	1349.5961	802.4161	1560.9654	1539.4912	1678.4956	902.5571	1546.6050	962.2977	1273.6573	1527.1459	863.0716	1595.0436	1257.5425	1425.1203	870.9596	1749.1830	1443.5180	1576.2731	1274.7777	2017.9547	1602.4604	1470.9373	1563.6207	1321.3702	1874.8371	1350.1597	1819.3350	1798.8306	1335.7460	1763.0771	1008.4301	1193.6567	1414.7450	2088.0601	2249.0101	1831.4535	1275.0261
X603141806F1	3163.719	2698.908	2853.261	3640.520	3078.482	2519.739	2040.489	2982.027	6834.180	2277.072	2165.828	3127.891	3698.691	1958.234	2095.248	2342.424	2881.419	1735.867	2065.990	2923.493	4981.218	2654.110	2175.430	2635.608	3139.756	2989.540	2770.290	3665.621	1997.926	2808.233	2221.288	3098.183	5310.556	2469.551	2187.283	1601.455	2298.986	2250.424	3929.742
X603141807F1	16648.56	19976.23	21214.84	16556.56	21267.24	18616.47	17900.76	17514.35	28567.37	14663.95	19621.39	22618.09	18424.60	16957.77	17220.41	21964.16	15701.35	19015.44	19235.94	25731.88	24203.85	18797.89	22431.98	15656.77	20361.58	23422.49	19871.30	20416.54	20517.72	20665.79	21753.33	20513.31	14246.18	15897.93	21787.56	21075.63	20587.33	17316.04	25962.54
X603141808F1	48.26011	54.08794	110.17057	44.84146	44.81642	53.71423	81.90715	81.95308	65.81564	50.09513	131.67429	59.36772	44.70707	54.67362	79.77600	75.84974	67.52215	36.54607	44.71822	54.94995	63.51036	70.59681	50.02921	76.19289	58.74984	56.36634	49.31294	160.36237	59.01979	53.78319	46.02996	67.87953	90.68585	98.49026	35.48845	57.98458	107.52855	46.25202	66.65841
X603141809F1	7837.489	8944.990	12371.961	11708.816	9685.215	8724.323	10922.394	7480.215	16384.948	10530.694	8203.973	11083.292	8857.754	14115.872	11541.315	10534.650	6367.403	11570.003	17915.813	14566.727	9395.112	14657.237	9963.934	9305.725	12817.849	11164.828	10066.090	12085.946	9197.793	8319.049	9442.936	10859.269	6796.682	7139.714	11970.479	9961.973	13836.855	12115.821	15958.500
X603141810F1	5054.871	9872.729	5991.052	3421.672	3702.148	3436.652	4721.652	6718.249	5132.094	2020.820	3225.113	4872.942	4588.431	3149.659	3930.189	5430.200	4902.643	5043.497	8839.168	6717.335	7338.055	10767.588	4667.795	5909.586	9041.036	9225.470	8316.922	5364.594	7965.646	7949.102	3252.045	9110.768	3398.154	5741.601	2386.398	2747.341	7911.285	6007.835	8873.359
X603141811F1	1304.864	1422.409	1739.943	1540.137	2018.685	1586.501	1837.988	1208.569	1222.730	1386.641	2451.324	1760.296	1293.572	1166.511	1491.038	1830.017	1323.867	1485.285	1253.674	1745.885	1600.253	1333.639	2301.650	1277.101	1533.920	1796.761	1760.212	1763.703	1711.337	1502.709	1802.089	1313.209	1330.254	1594.561	1414.512	2030.321	1417.741	1560.428	1171.931
X603141812F1	598.5023	600.7456	677.0732	609.1152	501.0202	826.4405	401.5577	817.1792	514.1349	632.2299	431.6122	510.7838	1274.9554	NA	594.8092	563.6464	501.9991	491.8930	741.0532	726.1615	473.8418	610.4516	669.8398	672.3396	632.4411	702.5264	474.7199	623.9865	459.6731	412.9713	593.3801	504.8000	628.1896	575.7216	563.8333	485.8099	509.3246	444.5493	559.1774
X603141813F1	21033.50	20046.92	22252.11	19693.24	23701.68	20912.94	21918.85	17125.91	22712.88	20284.57	19346.38	19995.22	19166.80	21651.48	22407.80	22027.13	18004.11	20042.40	22090.08	24013.60	24561.70	22864.47	20449.11	16453.02	23152.44	20264.07	20849.53	22783.55	23028.56	24902.91	19694.88	24307.31	17614.31	14811.44	22838.59	23233.84	21504.15	20688.39	21004.35
X603141814F1	168.91702	376.41438	216.08239	126.17148	444.41162	341.43803	352.77177	91.15238	411.19100	106.54806	588.90345	327.79619	97.67409	40.59372	342.14710	308.99572	92.78197	363.15030	520.89481	324.17130	785.41029	277.74283	356.68798	386.47925	253.77516	234.44691	702.51098	257.26987	388.84545	616.95046	272.55020	278.78996	96.28227	125.87533	304.97647	559.21418	385.93262	423.46178	173.33060
X603141815F1	13969.09	16376.57	16073.65	15648.43	18669.38	15577.18	15133.48	15411.17	16234.54	14389.68	14123.57	16469.99	16344.95	17705.26	16519.95	17773.94	13071.98	15430.69	16355.89	17061.19	17352.57	14932.10	16413.64	14142.91	17414.78	16764.86	15279.62	17924.51	17195.53	16117.15	17510.24	16994.39	14567.66	13325.66	16581.92	16923.69	16763.44	16975.68	15617.91
X603141816F1	680.2981	1332.6787	1793.1988	1193.4267	1521.1714	1674.1138	958.4301	1196.5007	1225.5051	636.0773	844.3990	1188.6062	1356.1483	565.2266	1553.3000	1489.3784	1026.7181	1457.6121	1457.4030	1901.6418	1632.9770	1675.0035	1687.6406	1412.2617	1796.5020	1376.0111	1031.6181	1135.4383	1327.2537	1157.1400	1420.5407	1797.4321	864.0508	293.5016	1328.4709	1444.8035	1297.7551	1275.2388	1655.8096
X603141817F1	1445.861	2204.791	3021.898	2275.947	2925.690	2695.802	1634.154	1979.969	2494.534	2530.935	4274.904	2435.279	2377.232	1564.823	2453.852	2534.442	1863.496	2290.281	2424.410	2593.715	2374.201	2431.287	2437.317	1628.768	2637.301	2772.621	2184.489	2594.062	2050.546	2104.479	2242.536	2288.357	2003.719	1244.810	2798.554	2733.481	2233.509	2085.266	2203.628
X603141818F1	19099.74	20634.50	25113.29	19711.43	21921.55	20905.61	18155.91	18871.90	20305.66	23364.10	26865.04	22342.71	21820.13	20714.63	17565.87	19208.72	19085.65	22468.57	20575.35	21135.50	19918.37	16706.51	23696.45	19342.64	22275.11	20255.70	20012.27	21849.25	21606.34	21367.46	21040.77	23002.95	19149.90	20396.18	22286.68	20356.22	17791.32	18057.73	19216.21
X603141820F1	5443.146	4382.349	4970.363	6381.878	3191.173	3005.324	3925.560	6492.746	3516.672	5751.443	4935.444	3747.674	7673.226	3602.362	3348.094	4096.414	6378.630	4134.569	3687.428	3354.753	3701.740	3631.857	3444.215	4370.562	3955.892	4232.468	3846.151	3918.060	3158.219	3198.266	4271.621	3513.248	7663.856	6657.731	3705.866	4064.041	4011.418	3310.010	3726.481
X603141822F1	16007.31	17540.80	17735.52	14847.72	11922.07	17204.91	17133.04	16719.35	12041.74	16573.05	15530.24	13195.25	17606.53	15632.54	10845.36	13582.19	17974.60	18329.91	17279.30	15557.28	15975.53	10770.22	13893.57	17231.86	16705.12	14006.55	16399.27	16150.46	10371.83	15447.29	15033.44	12859.30	18602.12	19579.15	13089.99	15714.30	13385.28	11029.92	10477.56
X603141823F1	45.030917	85.478742	98.200584	69.774724	59.916839	90.591346	56.442973	63.193508	2035.267498	-2.789657	70.144267	54.933768	87.610544	9.110980	61.383972	66.124553	84.051659	84.193325	230.127386	51.834318	1795.698021	152.600118	100.741492	41.903722	139.199763	367.719062	155.285582	94.013019	133.256978	174.135358	88.786290	35.013074	18.153089	11.034938	118.238027	53.245922	42.605473	94.785033	133.265966
X603141824F1	206.38067	47.97203	48.56662	54.86778	42.25647	52.12025	45.43814	125.86668	40.80244	119.15576	48.17794	49.56183	87.22656	205.92806	54.38493	36.20640	166.12146	32.51183	50.87289	57.26557	46.39764	45.08585	33.74793	64.76492	57.49887	45.47350	51.19265	48.69808	47.38407	42.61429	37.07534	41.91996	222.44451	166.51069	39.97709	44.15928	48.77957	38.14875	54.72317
X603141826F1	1422.1641	1823.7269	1967.7152	1029.5085	2170.3785	1900.9430	1929.0987	996.0534	2658.8682	1290.7751	2739.4535	1514.1626	1013.4148	2518.1046	2025.3326	1840.6584	889.9974	1490.0072	1345.1749	2217.8673	2100.9659	2126.0398	2043.8594	1317.1233	1871.7974	1696.2021	1636.7927	2118.0619	2203.0109	1342.7216	1688.9860	2017.5496	1223.5154	1153.8982	1963.1278	2058.9656	2194.6088	1821.1042	1959.5565
X603141829F1	144.01769	739.23379	1089.23582	410.93199	418.48985	770.75840	789.10643	398.91457	338.10607	263.86543	1165.86089	437.87492	248.93885	32.09979	422.70721	624.10628	266.98610	778.87858	425.86310	401.48562	480.50575	312.30113	740.22393	1214.10019	497.60652	589.08326	650.57481	506.45178	318.84314	310.05542	672.30598	261.64843	149.64178	229.54701	376.28752	529.54731	337.34200	339.45087	321.36916
X603141830F1	1997.43337	3857.81331	1952.52998	23.70868	40.71536	1758.28912	640.10168	2266.17232	1325.03655	57.68957	30.21110	33.81538	2564.91644	2623.77644	19.08405	1437.78927	2672.45944	1145.27703	2087.61501	44.56656	1126.33470	25.39597	1784.35212	3016.33571	2190.58157	42.28569	53.97013	37.02470	1555.87522	22.68374	1289.94325	1736.99754	3256.26315	3476.76015	675.57286	624.30156	99.32978	29.86736	32.69205
X603141831F1	2096.5314	4898.0085	3434.4799	1894.7984	1847.6139	2901.2619	2225.4966	3649.1356	2044.1293	547.6454	1765.7128	1631.0243	3814.1801	2130.2753	1726.1881	2389.2125	3378.6339	2463.9310	3829.1212	3487.8259	2156.2829	3356.7481	2676.7365	3711.6178	4017.4664	3828.8188	3681.7293	2308.9472	2645.0189	2906.0374	1599.2780	2837.1361	3295.5328	5143.0517	1459.1862	1318.0462	2679.1729	2053.4420	3585.2917
X603141832F1	1307.6814	1573.2901	1322.3640	776.2179	5129.5050	1980.1651	2482.7447	657.1113	1446.7903	1007.3358	1715.9346	3677.4177	180.9561	153.0095	3078.1286	1674.4303	317.2969	2044.5854	2831.0940	3251.5765	7509.9231	2582.2468	3372.8276	1379.1729	1545.1187	2011.0773	3587.8816	1187.3075	4156.4186	4827.7317	2517.8915	3593.0380	616.2601	288.3089	1255.9429	2013.4230	3133.7158	1610.5989	1828.2922
X603141833F1	4998.732	4350.900	4984.854	3670.523	2520.697	3159.962	3465.756	4178.170	2655.409	3931.573	4921.091	4125.146	4434.656	1257.036	3766.739	4071.485	5161.819	4098.349	3772.577	3964.345	4223.669	5654.186	3610.776	2214.966	3734.214	4753.876	4433.689	3151.356	4620.083	3365.478	2475.262	4503.230	6084.727	4262.293	2769.336	3191.816	4310.895	4342.917	3595.470
X603141838F1	1017.5358	1199.7140	1987.8928	1262.7133	1674.0879	1287.9354	1255.2740	1180.3006	1882.2026	982.0005	1242.1843	1432.3290	1071.4188	967.5132	1900.4593	1590.6770	939.8478	1491.0844	1451.5549	2021.5824	1466.2017	1666.3143	1541.8303	1043.4743	1395.6147	1366.2997	1457.0873	1698.6238	1527.3763	1523.2292	1388.4744	1555.0700	1106.0647	812.8087	1883.2551	1526.3979	2010.7780	1914.0247	2021.4020
X603141839F1	190.147737	1069.024517	1583.227756	396.911663	816.140860	1340.127982	1009.770568	423.976473	709.673815	205.577972	1579.355725	913.628608	139.377036	-5.578439	913.481403	1052.456207	255.274534	1127.115782	671.125285	775.083914	826.094353	629.913814	1279.948712	1271.902977	927.879531	1090.716268	886.453328	1049.754475	668.976566	664.712246	1008.541068	435.072851	43.908767	52.618698	663.247724	1046.704892	550.244647	616.311496	693.122586
X603141840F1	722.4332	981.2320	1021.0158	804.3325	864.0716	961.5864	1745.2342	758.1207	913.4656	651.2959	1215.5944	935.8861	952.9312	1170.3762	725.8332	942.2147	574.7091	1202.6591	1007.5241	745.2716	516.5303	877.6592	1097.8382	1476.0187	787.2661	1009.0120	1136.0095	1008.4890	758.0920	1067.7404	789.1800	768.2351	908.6757	1370.3477	746.5897	1142.2562	1019.9666	847.7755	794.8785
X603141841F1	8586.350	7293.243	8987.654	7438.470	6311.169	6932.329	6934.792	8980.307	8420.592	7677.602	12357.424	9380.969	9148.050	6209.793	6942.820	6074.031	7251.875	7497.404	7773.098	6746.899	5926.038	8620.417	7164.246	7209.721	7687.873	7877.104	8254.659	6236.175	8261.802	10852.074	6487.760	9283.559	9326.156	9697.372	6057.872	9532.450	7642.894	8166.038	6883.994
X603141842F1	37.00517	38.60077	29.71257	54.01504	19.48485	35.20115	36.23250	67.34628	22.35471	31.26707	36.65949	34.63261	76.99787	77.23362	21.08546	47.14469	41.62705	35.76600	29.53707	28.12604	29.35427	21.79457	36.85264	33.12722	33.98384	44.87723	22.45035	30.04899	24.71287	23.80932	41.04325	25.24727	115.52363	55.71660	36.18553	30.47612	24.57612	20.27449	24.14377
X603141843F1	43.670104	235.672695	282.966158	50.298415	110.239368	184.636755	166.723752	59.720721	200.487569	14.182117	221.464302	211.269204	7.952828	11.435550	185.645652	196.930678	20.378502	246.281908	203.859237	131.498043	193.421025	188.392848	174.281927	199.246136	269.956980	248.984568	201.827867	203.422574	159.329851	178.017300	251.684922	198.768919	15.648874	9.434150	189.844200	197.849484	97.387588	113.683815	134.026016
X603141844F1	307.7009	387.1162	603.0583	457.8761	397.3699	423.4675	255.4407	486.7125	333.3324	383.6397	296.0080	413.0608	693.3589	156.6606	343.5620	520.6772	358.9582	426.8607	408.9402	554.8980	326.6473	319.1114	445.1093	312.4212	446.6024	484.2068	378.9157	410.0835	263.2253	317.3701	505.4262	356.3546	321.6086	360.3899	462.6468	381.4365	347.0161	436.7642	474.2112
X603141845F1	1637.1923	1245.4160	1253.2723	1145.3432	958.0682	1083.9996	926.5324	939.0226	1774.8519	1132.0364	627.6975	1307.6676	1137.4047	768.3121	1063.6702	889.3157	1191.3032	1328.7281	1377.9082	945.3112	1314.4062	1230.4948	1277.9283	1056.9780	852.7315	1081.6203	1459.7336	887.6468	1181.9924	1500.5786	925.4552	928.8298	1509.5698	1646.3757	788.0920	1146.4167	1272.1031	950.9406	992.2561
X603141846F1	671.6838	1584.1431	1654.9800	1404.5161	1222.5737	1199.2111	1220.7014	818.1750	1493.7065	739.8954	1923.8777	1280.6814	1731.7601	657.4126	1155.5159	1158.5752	789.2321	1108.8937	1088.8147	1589.8672	1432.6525	1419.8180	1150.0429	1103.1191	1625.4819	2032.8742	1231.6501	1639.7718	1276.2671	1202.3202	1337.5802	1355.3656	911.9897	588.8343	1036.7890	1347.3863	1574.4976	1394.3521	2018.0053
X603141847F1	14720.240	10151.607	11313.876	16137.914	9728.602	10467.838	10170.076	16768.878	11146.932	15326.156	9865.020	11617.525	18796.036	13341.201	10926.053	9520.950	16350.808	9745.154	11047.817	10338.989	9415.091	10828.607	10642.818	10057.431	11267.501	9631.694	10444.939	10816.533	12709.921	12645.808	9286.033	12242.623	18788.922	16217.680	9894.650	11384.591	9399.256	9859.454	10539.360
X603141848F1	1621.1637	2724.2924	3563.8268	1687.6872	4771.5708	3713.6337	3450.3795	1615.8795	5271.4286	1211.9819	1975.2118	3361.6520	1705.0386	2220.1921	3973.1126	3529.3186	1343.8471	2919.0228	2937.9709	5323.4319	4699.7910	5351.6472	4750.2647	2393.4394	3731.7127	3145.0382	2658.2523	3675.6926	4138.3794	3157.7613	3443.5185	3908.5207	830.0166	924.3025	3663.7102	4544.2484	5121.1541	3748.7110	5163.3125
X603141849F1	410.6964	261.3619	259.6630	787.2969	321.6259	340.2766	340.8962	381.3734	264.5882	488.0648	414.2223	215.2811	367.8791	307.9330	318.5749	223.5628	523.8168	340.3243	238.8098	306.5633	218.1253	288.2550	320.0454	458.0293	332.5743	288.9482	381.9268	194.1148	225.4461	202.2253	266.8473	197.7694	527.5847	418.8878	341.7201	239.5478	275.9818	246.2143	237.9477
X603141851F1	286.4290	343.9425	342.4055	166.2854	394.1333	405.4505	603.7092	206.9496	305.8867	136.1375	450.2729	363.6767	123.7073	427.9324	485.2703	335.2370	117.0106	357.9940	380.2040	305.5520	269.7582	514.3056	389.9765	518.6304	258.5071	328.1663	430.7074	279.1610	462.1189	386.6157	322.2139	449.6440	183.8334	421.8282	245.1229	476.7312	605.2727	498.3011	328.0452
X603141853F1	1471.4625	2598.8568	556.1323	927.5169	2361.5160	2310.3467	3470.5535	1169.7147	1075.1693	1308.9684	1917.2416	2726.4093	342.0882	927.6540	3211.9462	2842.6992	1196.9432	2659.2927	1734.9263	1402.8637	2563.3017	827.4967	2669.8048	3439.2857	1498.0701	982.2562	4357.0090	1794.3123	2902.3577	3782.7292	3160.7459	2784.1290	908.5293	1765.1036	1588.1443	2207.7727	1261.9578	3636.0518	1133.2197
X603141855F1	3245.647	3840.753	4665.144	3986.148	3416.223	3928.759	3903.859	3341.131	2692.818	3209.074	3440.526	4045.195	2728.568	3754.822	3275.393	3921.585	4046.770	4601.034	2932.689	4715.927	5255.637	3522.518	4325.363	4650.593	4214.400	3504.594	3589.486	5096.324	3959.328	2663.801	3663.932	3169.508	2767.110	3319.897	3292.680	4142.027	3500.545	2758.612	3877.982
X603141857F1	17990.24	18329.24	17295.34	18680.35	20791.88	13374.65	15673.81	17689.43	22504.85	17527.67	15633.63	15827.25	21600.14	17769.53	19853.41	16549.59	16637.78	15566.11	14870.50	14635.01	20159.63	16766.42	15324.51	12645.79	14883.22	17345.37	17002.01	16108.01	17122.21	22448.38	16918.63	19433.89	21131.90	15735.28	19127.02	18205.23	18973.53	21489.96	19217.05
X603141858F1	6467.154	6746.152	6041.978	5643.514	4036.432	5895.296	6830.833	6297.309	3980.557	6959.264	6606.950	4247.907	5153.523	3964.728	5025.646	4824.240	6741.501	6952.803	3747.027	3610.812	4427.218	3572.672	5793.889	7446.239	4266.017	5172.881	4835.670	4347.671	3491.445	3648.108	5590.784	2751.819	5724.181	5371.193	3896.942	4928.319	3500.212	3366.770	3728.414
X603141859F1	4455.834	2600.990	2824.017	3534.829	3986.718	2442.878	5392.593	3288.081	10022.027	4732.606	4052.528	5169.222	1558.728	2801.125	4004.962	4407.006	4323.225	2954.479	5337.455	4347.526	13810.604	6386.423	4874.227	1602.765	3278.386	4897.735	5624.073	4389.665	6166.345	5903.460	3401.500	3803.066	3223.374	2935.860	1943.745	3421.047	8163.274	4686.494	4675.641
X603141860F1	651.4115	495.0867	589.8032	991.9632	489.7279	644.1936	448.0153	933.5722	463.0576	703.5940	502.5549	403.3219	1232.8693	884.9377	576.8716	488.5470	788.9687	484.8384	554.0839	414.9693	421.5692	590.9296	519.4469	594.2655	487.8981	582.5796	470.8270	507.6438	447.5661	359.0767	433.3321	398.2288	956.5858	682.8615	527.7544	427.6088	333.4677	414.0667	422.3564
X603141861F1	77.73385	32.49641	41.37293	32.90455	26.28733	42.11189	111.42463	49.02539	27.03388	40.88978	45.67147	39.03987	70.49249	96.93077	41.64207	29.34624	57.99745	38.28643	22.12787	35.49324	30.53986	49.49013	29.68311	48.18772	38.68872	22.10732	50.41948	20.57522	29.24133	24.12470	25.95167	26.60008	84.00729	89.36365	32.03543	24.48977	19.16413	26.14927	41.58054
X603141864F1	448.2190	428.4993	969.5778	346.4548	379.6348	609.3428	543.8577	727.2790	481.2268	561.5897	559.0215	816.4275	486.6663	111.4326	474.8227	609.8548	794.0251	807.7082	647.1303	464.8961	1289.0300	410.6861	454.9519	364.3985	556.5538	847.7071	778.6305	377.1743	311.6385	287.7570	710.8461	362.4470	561.0665	373.3487	533.4115	428.3897	366.5435	313.7439	536.1730
X603141865F1	145.52574	456.98831	709.29008	354.41648	569.08615	461.13117	366.46992	420.89416	815.75298	106.55364	418.12829	489.64003	487.72166	95.60393	670.59092	551.54399	174.08375	513.20995	617.52585	613.51775	586.67119	801.46412	679.78494	392.63556	667.19338	664.07063	467.64339	591.62731	615.76312	428.55741	544.52368	709.17698	103.23677	71.17907	514.88891	613.22798	623.05056	545.52371	598.97969
X603141866F1	273.6706	316.6825	139.5364	717.5754	915.4249	266.5337	104.7063	159.3512	578.1432	173.6763	162.8583	161.0944	855.8232	105.4621	347.8802	389.2758	149.7402	248.4379	497.0712	256.4771	1573.6163	220.8821	318.7663	212.3476	251.0913	720.5728	238.8159	254.8540	206.9158	1651.8796	279.1501	218.5747	221.2252	115.5073	653.6650	272.8718	317.9233	662.1624	341.7842
X603141867F1	12.576759	50.353334	87.854488	18.425532	40.300567	99.591484	18.380758	20.086042	41.177249	8.029785	34.715529	60.713163	24.223037	6.423946	18.145806	67.934981	8.667070	55.426755	33.586752	50.920241	40.814406	18.609074	77.874969	25.898483	102.441417	93.129271	19.772336	30.098345	23.825981	24.272377	94.782965	82.783208	9.983446	7.190895	51.404518	26.332783	21.362895	19.567760	57.886763
X603141868F1	3429.843	3912.378	5939.184	4245.351	6202.130	4207.431	5167.789	4611.663	7583.365	3712.200	4951.557	6914.383	4793.549	3696.127	5135.245	5123.095	4009.405	4385.672	5177.020	5895.030	7297.649	7943.489	5299.740	3342.009	6259.486	6881.730	6722.060	6634.003	6000.546	5408.278	4500.997	5009.676	3521.284	2368.461	4547.757	5738.582	8365.870	5616.064	6371.775
X603141869F1	1529.7727	3063.0043	836.1096	1072.3494	1618.0940	1898.8546	2668.7626	1296.7042	900.3121	1474.8283	1595.5310	2039.6599	884.5167	3535.3644	3146.7922	2388.5890	1288.6216	702.5243	1745.7998	670.0922	1842.5249	1529.1503	2031.3411	2763.5665	1111.5337	1685.9523	2113.6650	1609.9614	2330.2798	2066.2219	1659.2232	1420.2093	1560.2031	2033.4240	1734.7238	591.1806	370.3632	1829.0459	897.5959
X603141870F1	869.4935	2210.6236	2195.2908	981.7148	1743.9539	2095.0372	1894.5595	1378.5016	1884.7496	659.6453	2164.7483	1767.5660	989.8388	856.1936	1932.9679	2041.8683	793.0194	2054.0370	2152.2330	1999.1420	2010.7841	2032.8172	1839.4778	1863.0565	2242.9515	1966.5834	1853.6679	1964.9955	1895.0410	1862.4368	2042.2993	2092.1522	614.5115	945.5695	2053.2493	1892.9900	1778.7310	1833.9583	1936.5989
X603141871F1	12946.750	16649.147	19023.499	12146.320	19751.168	17431.454	18470.149	11303.298	18696.454	11701.275	17562.430	18969.552	11733.931	11031.447	15996.699	18401.980	12051.153	17854.045	18151.385	18673.366	19302.032	17926.689	20611.821	16934.960	17086.801	18728.662	18321.840	19522.391	17565.443	16489.054	18754.657	17550.936	9074.568	10291.739	19891.759	18115.381	21484.594	16612.385	21037.128
X603141872F1	212.89011	104.39487	95.80618	176.36401	87.20553	54.11649	62.17827	78.19820	78.24557	132.56580	114.31706	51.94959	165.36431	204.99643	147.98838	115.70574	74.28235	69.85139	67.66102	53.00702	70.10062	80.93307	60.53125	52.99238	63.12945	74.58908	80.93075	69.81375	78.12678	85.14559	82.48441	58.28115	151.66701	96.81285	110.39478	107.46568	77.41396	103.31683	107.70107
X603141873F1	9105.051	10876.366	12549.381	10489.432	10678.884	10733.994	8782.925	11278.194	10377.902	9314.035	9468.743	9348.651	12276.286	10829.557	8293.097	10820.121	8946.826	11147.213	10955.031	12188.522	10945.739	9191.425	8610.718	10296.372	11384.354	11743.233	10878.548	12088.094	9481.647	9912.277	10886.761	10161.707	11528.800	8851.909	12164.918	10624.438	9735.065	9219.330	10060.992
X603141874F1	7250.435	5446.825	8277.628	7358.545	7134.910	5328.651	6322.914	9019.372	5196.926	7229.338	7062.267	6410.232	10449.301	6936.582	6238.263	7561.732	9051.000	5711.448	4641.303	5944.056	8062.117	6848.480	5751.771	2511.375	5876.269	6569.645	8584.460	6309.791	5583.815	6385.784	6446.902	5198.910	6681.739	7477.439	6702.385	6897.795	8331.345	7598.407	7712.088
X603141876F1	9333.322	14257.046	17053.891	9347.749	14131.656	13161.528	14230.916	9778.853	16158.659	9082.535	16158.523	14169.628	9017.649	9408.433	15284.501	14443.642	9455.207	13601.287	13394.659	14585.263	15429.023	17237.258	13789.883	11634.377	15589.184	14618.890	13291.342	16418.923	15221.615	14937.263	13699.464	15742.607	7515.853	7371.262	15163.080	14619.590	18444.891	15748.389	17960.719
X603141877F1	4882.337	4936.777	7897.365	5046.832	4702.360	5141.919	6394.352	6656.020	5996.366	6970.445	8375.951	6627.602	8004.137	4999.805	5526.966	5211.127	5570.087	4881.908	4182.510	5281.710	5069.016	7433.333	6536.519	5382.115	4928.200	7480.293	5303.567	6660.488	6008.681	3449.728	5168.419	4874.755	6454.909	5144.631	4134.985	5363.486	6269.884	4658.733	6123.710
X603141879F1	1772.321	1923.697	1859.242	1725.935	1574.297	1341.271	1304.531	2300.652	2723.767	1952.863	3996.362	2386.983	2154.782	1914.540	1765.723	1679.707	1781.697	1169.936	1516.116	2117.334	2829.981	1819.932	1589.517	1660.293	2700.539	1682.717	1595.836	2425.581	2015.618	2015.387	1643.862	1931.067	1983.651	1434.275	1747.371	1616.473	1630.460	1502.354	1895.356
X603141880F1	39.057648	124.832912	215.037036	54.405860	74.147493	118.919102	73.966792	63.328756	99.848756	55.408786	92.683895	50.924010	8.022138	35.463599	159.625646	165.628254	71.924235	49.098513	150.185642	67.678407	65.825510	108.711848	58.788684	102.188517	159.982072	52.622428	130.184035	162.562062	82.804723	98.310766	151.290843	87.695872	7.445211	105.618039	120.838747	102.164677	147.826369	119.991912	76.773097
X603141882F1	22.17448	66.62811	17.93490	27.06880	21.33905	28.13857	41.99213	35.26162	75.83448	21.99515	33.90660	30.63378	30.43609	18.64139	37.45552	26.23312	23.27808	85.47456	28.05540	14.08403	26.18227	22.11833	42.24571	53.03748	27.92613	51.35916	25.66967	18.35449	22.87385	38.27247	55.46684	27.83096	26.02682	18.86893	47.77419	20.17264	24.13761	24.92666	29.21044
X603141883F1	481.7612	541.1117	626.9661	565.4339	577.5139	637.6814	395.3460	714.5423	562.3201	465.4321	525.8114	575.2088	681.9253	458.3151	541.5355	553.7013	619.6135	645.7242	575.8899	586.9469	600.8636	707.4141	593.4371	532.3499	689.9333	640.7133	471.1231	548.0355	492.6062	425.1593	584.1597	645.0926	641.7688	415.9767	599.5102	652.8782	648.1460	548.9561	484.8078
X603141884F1	6703.060	4296.610	5511.087	5260.123	5612.346	4198.139	6299.545	7157.111	11828.203	6730.892	6376.449	7577.572	6363.205	6462.319	4647.851	6139.738	7153.630	4553.875	7539.263	6499.629	13733.934	8148.493	6366.856	2539.233	4747.806	8245.903	7000.494	6541.717	6325.839	6591.905	5523.025	4743.454	5696.655	4666.547	3900.664	4971.753	9584.870	5905.983	7129.585
X603141885F1	404.3676	1063.0917	1368.2779	440.3442	1435.2785	1113.2245	1252.2730	526.5799	1494.8974	267.5254	967.1061	1324.9315	590.4087	536.4369	1343.6910	1408.6466	248.7398	1214.1801	1789.8741	1606.8695	1397.9859	1559.3635	1270.2179	933.6641	1360.2979	1420.1246	1258.3650	1413.9709	1423.8744	1149.4533	1212.0244	1665.8071	443.5967	256.9103	1381.5034	1591.2004	2223.0957	1453.5950	1877.2598
X603141886F1	10920.048	8045.538	8116.940	11844.464	5902.782	7626.390	8414.142	10877.917	4911.680	12465.979	6974.285	7346.837	10998.445	10651.991	6276.929	6752.748	12612.123	7412.815	5472.937	5589.168	5080.978	5238.879	7405.331	9322.967	5859.055	6900.746	7192.856	6190.529	6389.010	7810.397	7042.549	5952.888	12949.374	13348.996	5591.428	7636.340	5663.801	5868.684	5936.370
X603141887F1	413.150185	321.087728	1024.300911	310.512176	417.661379	368.132667	628.543024	1412.978980	4539.302889	1360.441312	532.626257	464.431842	479.906696	819.167434	38.656395	135.923705	475.216274	411.253651	1172.251909	702.530643	4871.989207	1524.852472	339.836985	274.384014	1051.927685	1787.362130	773.604399	2108.695241	597.597040	2412.188866	222.534025	437.311029	150.685618	4.400201	236.145971	512.401454	1406.372079	511.443512	1232.722571
X603141888F1	445.91777	628.71086	491.24446	752.36995	1929.29028	545.39728	426.32231	408.38548	643.94991	694.28861	213.84620	99.48927	1265.18347	83.23653	234.06255	777.79497	86.56854	282.20544	292.89044	144.90718	302.05462	453.20274	250.98807	138.87431	210.16636	3225.42134	407.96275	NA	138.30740	493.46736	106.08371	201.87032	104.06355	3869.79948	315.72885	128.21990	128.48768	279.59663	181.89554
X603141889F1	4230.382	5112.067	4478.482	6258.116	7228.322	4393.554	3301.135	3891.813	3680.225	3138.458	2984.520	5161.182	6869.131	8641.186	5617.991	4394.441	3620.124	4220.524	3406.515	5984.970	4094.591	4631.135	4658.786	4311.383	5331.513	4368.999	3950.473	5715.482	4623.628	5574.185	3932.113	4204.169	4362.568	2479.443	6474.426	4903.989	5448.429	6765.542	7013.210
X603141890F1	9944.693	10724.217	11631.173	12592.889	12540.740	9103.480	8877.623	10987.259	11892.563	11095.464	10392.252	10576.536	14435.490	11229.574	8816.269	10557.186	10900.997	9877.927	11753.639	12180.608	10938.527	9561.654	11272.575	9404.573	11851.928	13979.939	10061.179	11375.704	9011.172	9658.479	10293.308	9902.270	12103.926	10615.221	12897.459	8665.162	9369.322	10261.868	12676.301
X603141891F1	858.2407	1303.8057	1977.4684	1277.5789	1490.9553	1537.2440	1159.4580	1129.3356	1464.7910	1547.2333	1480.2499	1201.2525	1369.8913	1260.9149	1462.0746	1563.2853	1008.1941	1436.6813	2211.5473	1561.1754	1172.4103	1444.3754	1361.9073	946.8336	1870.3109	1631.0700	1335.6660	1375.9671	1453.6359	967.5464	1362.5607	1671.0608	1348.1954	644.3789	1423.6002	1085.1575	1457.0754	1409.3467	2261.1185
X603141892F1	5050.323	5233.363	5724.300	4928.893	3291.643	3725.982	4477.933	4697.846	3955.343	6422.840	4505.223	3855.030	3738.253	2799.551	3558.356	3495.894	5117.193	4778.409	3848.031	3285.741	2815.678	4562.336	3947.568	4607.482	3797.590	4461.271	4101.713	3216.092	3759.852	4329.297	3594.656	3224.835	4999.034	6014.689	2989.111	3940.256	4216.914	4032.631	3900.500
X603141893F1	24498.04	31592.10	30167.60	24712.28	22083.38	29297.20	28953.47	24702.12	24349.15	27731.11	27134.10	23813.27	27795.26	29860.48	24786.04	29580.43	27753.72	31334.30	26257.28	23468.50	20478.83	22605.63	27013.20	30120.10	28001.86	25402.67	26044.14	29000.77	22396.80	20473.05	28158.30	26735.36	25867.21	24136.04	25311.29	21928.44	21014.87	21759.20	25324.13
X603141894F1	1270.3983	1224.9897	1704.5572	1231.1420	1213.3574	1648.2955	1081.5649	2163.5223	1207.6334	895.6544	795.8408	1827.6630	2349.0619	604.7582	1288.1816	1555.2152	1179.9045	1671.1367	1463.4137	1918.3307	1199.0173	1395.8893	1714.5017	1223.9562	1395.2328	1678.5718	1645.7520	1652.9834	1205.6385	1134.0770	1870.6351	1372.2257	1387.7980	1374.6737	1893.0076	1413.5672	1088.7044	1370.9667	2232.7537
X603141895F1	20271.19	30077.56	29046.86	20672.29	27450.02	28562.11	25917.91	19667.36	26937.70	18143.24	26306.43	26898.87	23595.93	23229.55	27540.11	26637.98	15917.15	26549.38	25544.54	25896.02	26675.98	26468.82	25650.39	30133.59	27531.49	27414.81	23853.06	25982.41	25773.48	25113.12	26137.16	25607.66	18969.35	19915.88	30077.06	27014.43	28891.99	27752.45	31500.25
X603141896F1	4416.824	3042.468	1910.288	4191.795	2660.218	3218.644	2510.394	5154.737	2947.530	6584.820	2961.187	3077.424	4912.769	6308.924	2673.596	3235.485	5163.201	3461.013	3549.069	3123.055	2352.382	2885.053	2052.644	2442.089	2595.774	2845.679	3646.285	3055.045	3489.844	3099.151	3503.631	3870.109	4917.069	4176.892	5624.802	3251.818	3756.545	3508.565	2794.772
X603141901F1	11936.853	17775.827	17999.965	11450.921	17997.863	16713.322	16296.546	10222.471	17251.484	13125.410	15573.844	14996.327	10724.981	14377.917	16790.480	15715.764	9599.970	17855.170	17406.411	17440.556	18160.756	18674.085	16323.399	15805.772	18915.417	15908.602	15525.057	17077.858	17423.801	15921.338	15414.436	17227.923	8291.421	7432.490	17681.562	18025.103	20660.635	18288.930	18812.140
X603141903F1	89.23922	79.61364	108.59218	47.28550	113.45100	121.90647	72.28898	66.44438	86.12738	44.61346	67.22821	107.51338	108.43285	59.85687	131.22360	57.13622	80.83359	124.40313	111.63164	136.77695	282.11959	71.64813	40.81279	91.58174	113.77380	72.42832	100.52736	133.17739	83.21346	98.21443	82.29862	151.53827	43.68152	53.38665	75.20750	82.85790	55.46486	70.75165	140.39843
X603141904F1	3768.258	3240.623	4044.302	3319.867	2991.700	3897.860	2914.708	4353.358	3834.601	3462.348	3083.832	4008.598	5577.978	2992.627	2731.442	3304.554	3387.721	3393.460	3227.840	3694.445	3392.650	3792.124	3942.972	3647.067	3198.737	3647.623	3161.979	3134.739	3516.345	4266.634	3252.914	3722.085	4967.868	3816.883	3326.573	4473.292	4160.622	3497.151	3448.517
X603141906F1	599.6460	571.4980	1079.2146	876.1733	677.8329	771.7373	813.1584	934.5377	707.9433	843.8146	831.8921	547.4645	883.0750	445.8011	608.1378	741.1281	935.2528	726.5322	668.6026	575.1747	630.7318	664.8297	705.5714	813.0314	662.7145	1071.4789	868.1277	469.0239	632.6779	545.1467	771.2636	575.5630	816.8319	1043.8347	812.8942	762.2125	511.4040	552.1052	455.3548
X603141907F1	247.14315	424.32955	363.52696	192.11377	713.84436	934.87164	452.85598	233.67083	2041.28884	177.40827	198.84998	872.82937	153.26731	921.55563	599.49366	447.13157	59.03849	213.37067	395.33068	1871.71145	1225.85039	465.27758	323.91648	783.66317	2354.34985	229.59734	288.67836	1772.09579	618.16809	824.38012	436.90828	371.44351	76.13685	200.99405	1141.23674	1173.36680	626.11228	600.66561	1059.43944
X603141908F1	3390.2035	5442.4602	3318.6176	2234.5491	1869.9431	2762.5840	2190.7571	4950.0997	1680.4294	1368.5082	1824.1569	2193.7962	6085.4635	2956.1048	1097.9543	2641.4542	3872.4680	2350.2168	3756.2673	3564.5171	3506.5546	3409.4291	2334.6695	3168.2747	4618.4535	4282.6676	3254.6273	2644.7095	2450.8372	4361.6229	1343.5380	3642.0760	3330.5936	5744.4858	933.6362	975.7114	2700.1006	2312.2101	4326.2793
X603141909F1	507.7610	593.0002	778.0229	501.0324	946.5139	806.9579	668.3494	480.2394	1345.6571	300.7231	723.0682	755.3976	535.4705	956.3797	762.1595	863.4873	483.8507	698.7967	797.1538	1023.6467	1151.9115	1073.9712	850.1173	391.6352	762.4866	690.4769	615.0148	892.8878	888.6207	599.1512	741.3254	786.2462	622.7154	302.5711	834.8667	932.2722	1246.2969	793.6956	910.3239
X603141910F1	9687.585	10237.869	11949.448	10837.090	10099.210	12453.042	7975.164	11796.745	9554.009	9378.609	10457.334	11777.220	14731.695	11589.922	8130.886	10502.803	9923.570	10164.262	11199.393	10662.032	10154.142	8112.188	11171.678	10218.042	10411.764	11812.101	9722.481	10069.808	8546.818	9173.831	10865.752	9420.262	12413.640	11423.863	10738.411	10915.021	10711.549	9284.740	12037.067
X603141912F1	2166.106	2305.465	1443.607	3071.456	2022.258	1733.530	1555.411	2619.985	1891.068	2544.375	1771.767	1630.309	2701.319	3481.594	1925.208	1832.989	2342.115	1790.983	1717.010	1899.782	1844.830	1536.587	1737.609	2199.421	2588.457	1609.332	1391.046	2694.835	1811.305	1998.837	1849.572	1998.297	2944.428	2378.193	2196.679	1513.451	1298.641	1893.769	1480.320
X603141914F1	78.97863	103.33619	113.08141	123.68718	76.37232	109.36426	72.72953	97.27163	59.85795	146.12619	77.96409	98.44970	59.11937	41.04388	65.02345	101.95458	126.07646	136.41206	144.50089	93.22880	79.30864	69.07159	92.78340	106.77046	91.73857	113.29710	74.75059	92.68168	89.65733	74.75059	124.13496	91.89736	41.63061	52.84094	104.22457	95.79653	72.03182	85.94742	64.35753
X603141916F1	6353.366	9417.826	8619.064	9378.590	7558.119	8098.124	9826.366	8839.384	6038.314	4377.891	10866.644	7455.504	7997.200	3506.534	9061.905	8283.643	4888.708	8548.312	8878.714	7497.164	10132.193	11244.036	9035.766	9063.997	6488.874	12062.608	6390.187	6216.135	8123.683	6972.170	10598.090	6671.114	7991.722	9262.939	10346.223	7664.762	7638.557	7541.769	9250.064
X603141917F1	12834.182	17117.339	19865.498	11906.702	21097.386	19064.380	18526.526	10720.428	21630.301	11414.695	18246.450	23642.344	10753.660	10261.546	17273.801	20356.128	12059.831	19659.703	20478.428	21213.777	20628.083	19553.087	22595.265	18095.093	19000.299	21230.801	20113.964	20516.691	17963.486	18684.908	20158.789	18889.142	8599.722	9561.305	19682.936	19027.306	21922.069	17950.794	22717.649
X603141919F1	136.57761	179.59901	167.20393	309.81746	340.89874	333.03631	122.56925	327.01326	438.71718	387.48861	261.28756	304.48444	59.95004	154.39660	349.36190	415.94062	66.04926	184.49366	234.51909	334.50033	198.50133	182.64194	230.19656	396.70842	165.24887	443.20391	361.03838	243.97218	252.42212	119.88970	425.30804	172.77613	34.10221	259.40226	414.38882	359.62406	302.35798	400.48372	284.35617
X603141920F1	6.206699	7.827145	8.017164	7.672665	5.950018	7.060603	9.112453	8.110689	NA	7.633004	10.951346	8.519771	8.405571	6.910938	7.497426	9.441115	7.430564	9.591854	20.784644	7.935028	NA	7.119923	8.452473	8.742826	25.125986	9.992372	10.773120	36.763904	6.949441	22.859330	8.422041	6.859237	9.444278	8.080751	9.005039	7.536256	7.360539	6.711988	7.965569
X603141922F1	646.0584	882.2667	1393.0873	708.7767	1021.9557	1014.8828	896.3590	485.2511	777.6196	691.9236	2107.5832	960.6024	343.2238	305.7088	1018.3011	1100.7896	680.9970	1023.5017	854.9169	718.0687	896.8353	640.5965	1343.2641	901.4449	817.5910	1064.4347	853.8173	1103.1734	627.5018	730.0918	1082.9170	428.0893	305.9634	585.4454	904.5369	1128.6271	732.3014	830.5582	834.8778
X603141924F1	58.52234	139.48690	138.84746	51.23996	125.98230	200.57528	188.47337	69.60082	83.19228	30.46718	221.39920	87.52715	72.43192	74.56825	148.19890	95.50333	38.06709	103.42650	93.49576	129.46088	110.11237	152.69446	115.25988	250.15808	83.32764	82.07859	140.90777	107.20708	114.89679	70.56705	111.73878	106.28618	67.34971	42.87851	121.68290	94.09134	112.62561	98.95794	102.46032
X603141925F1	127.92451	31.71471	37.46615	70.18985	42.03569	41.86191	32.55835	69.84755	44.11632	68.20700	30.57531	43.61274	120.70615	145.77485	38.63525	40.54546	50.84517	37.39178	40.64584	36.41949	34.76760	36.60597	52.47104	32.40665	48.58781	34.30270	34.25136	50.45503	53.91666	39.11009	38.49649	33.25787	83.84691	186.39605	49.18815	51.39707	72.59883	34.20112	51.29459
X603141927F1	3678.727	2889.292	4440.542	4731.514	3353.070	3582.161	3466.136	4876.728	4258.076	3926.469	4307.505	3204.207	6396.655	4002.282	2812.970	2846.656	3422.504	3065.057	2964.034	3728.662	3061.746	4251.786	3903.027	3432.748	4123.339	4013.015	2984.084	3589.537	3539.954	2845.702	2829.042	3384.366	4569.537	3943.927	2665.388	3304.127	3307.343	3815.054	4258.341
X603141934F1	156.81219146	325.94816688	360.27733535	176.15524263	381.70017605	283.68335934	164.12854951	225.16292567	1156.42619721	136.87784379	243.51818998	238.79700767	105.61407108	29.81552034	403.69537993	284.07218823	79.79390946	311.47056106	551.50871712	298.64739203	1160.72781473	338.67528122	364.48628202	216.18858125	327.65540114	467.13819510	376.81604262	626.36996579	280.34188136	437.56731771	255.93979065	401.61575907	-0.02751441	70.08715677	428.62021687	293.53299045	322.31255899	327.85519966	409.90791965
X603141935F1	7603.368	8942.170	15248.839	7415.993	10776.875	8569.012	14534.869	9189.008	14805.749	8822.157	13440.858	9970.956	8276.655	12207.382	8000.589	10329.949	7119.940	10108.419	9239.217	15728.402	10546.171	9896.193	11133.985	9621.819	14985.219	12735.828	10143.897	20895.777	13158.889	9793.279	9688.675	9466.819	4905.969	6464.872	11146.230	9813.149	16344.401	9023.643	13687.490
X603141939F1	5662.209	6729.770	6131.582	8058.650	7932.100	5423.244	4769.822	4799.130	8166.379	5573.799	4977.866	5184.370	6719.211	6365.248	11138.068	6273.555	5759.743	5672.826	5441.059	5256.450	6203.436	6688.494	4848.854	4596.956	5320.969	5486.677	5637.801	4819.241	5791.324	8291.661	5398.092	7613.405	5952.267	5394.755	9659.311	6168.271	7239.202	10282.376	7319.297
X603141941F1	2810.206	4406.213	4504.362	2450.192	3082.567	3895.855	5141.076	2693.000	3166.638	2581.394	4814.759	3195.529	2713.169	1634.816	4105.305	2743.048	2067.470	4115.078	2546.971	1807.347	3197.416	3968.237	3168.740	5693.962	3153.753	3316.367	3337.774	3190.033	3186.943	3706.788	3110.868	3999.853	2846.736	3120.976	1655.482	3294.239	2734.173	2851.458	2248.171
X603141942F1	449.4332	337.6444	501.2211	334.6521	467.4665	303.8751	298.1732	371.4853	832.0288	315.6595	227.2856	456.1980	366.4172	144.4416	306.7453	357.0370	268.9798	416.4089	376.6870	452.8919	269.1616	582.3289	420.2954	295.0133	368.9597	434.1162	494.4529	329.6517	387.3773	778.8508	340.8762	501.3137	308.7667	253.5114	399.7250	633.8654	649.4244	494.9607	398.2624
X603141943F1	554.9731	588.0258	535.3881	373.2639	678.1077	477.4157	771.8293	416.9198	564.7557	556.6681	419.7562	687.9203	453.5847	358.5644	609.0906	683.6816	457.1140	701.2350	579.5141	577.6741	614.1115	909.0688	849.3273	486.4636	490.8218	517.7809	814.8975	431.1386	658.8961	771.9555	611.2364	708.5672	229.8471	351.0973	503.0407	1047.6108	1170.3431	655.5741	570.6338
X603141945F1	37.18410	42.12448	69.69266	24.19234	43.91948	51.43933	53.22993	41.86412	45.44816	35.22527	58.70324	48.66596	55.48554	41.19797	58.36636	39.05892	48.77777	30.26929	39.21484	61.66197	56.20566	70.86576	63.65201	57.71260	28.27719	32.66319	64.29083	52.20910	52.45353	46.20826	27.40114	54.95008	35.18354	29.98579	61.32571	60.34486	46.08120	40.40983	33.97000
X603141947F1	71.80651	103.36033	115.31918	94.92920	109.33303	117.17192	72.80822	72.36137	64.16447	76.56802	129.05438	64.65067	103.55591	67.50683	68.19107	97.88888	77.19600	97.39302	71.98950	80.19290	80.54772	78.77315	104.40374	118.83208	75.30628	129.46789	78.00392	77.29856	52.86737	53.83472	142.28191	71.04611	74.43367	80.89907	120.19781	85.02286	78.03479	72.89714	65.07758
X603141949F1	719.0936	444.6700	705.3765	711.9216	596.3509	709.9875	264.5313	822.6808	593.8604	647.2654	439.1919	673.7073	980.8048	1046.7352	442.0921	617.7120	905.9230	456.4842	266.6529	773.9430	373.1012	477.4442	816.5171	476.8492	692.1844	670.0827	427.4588	532.3144	515.4349	363.0304	676.9690	523.2899	788.1062	796.1794	538.0697	615.9673	524.2413	401.2930	818.0065
X603141956F1	17.03276	27.66749	23.38696	17.74050	24.60659	24.90929	17.61799	15.08425	18.00432	18.54014	19.81225	19.51581	20.22783	20.59967	17.07712	19.10214	16.91712	35.30194	17.41445	22.59750	19.82744	18.86908	21.89386	20.05381	17.83874	24.81608	21.17483	21.23747	17.76165	19.64141	20.63354	22.45830	12.77960	20.43849	26.89259	17.55885	16.41776	16.10804	15.54403
X603141957F1	5475.368	5321.607	5956.211	5025.189	4279.581	4682.672	7108.898	6351.753	3427.513	7786.144	5740.407	4307.227	7070.525	4073.483	4316.029	5173.164	6748.254	6089.406	4048.181	3893.760	3809.324	3985.563	5683.359	6209.001	3782.535	5553.864	4315.665	4166.676	3504.299	3732.399	5374.090	3655.157	5021.382	5771.410	4409.951	4887.563	4437.248	3755.423	4135.610
X603141963F1	13393.861	10144.069	11685.410	16631.695	10372.547	10464.662	9616.468	15482.820	10042.566	12412.577	8984.161	10289.133	18136.357	16316.493	8762.291	10796.756	14699.979	8963.588	9273.595	11443.540	12512.771	9210.994	10423.056	10694.047	12527.324	9513.069	9290.076	14275.312	11834.897	10895.761	9891.259	10255.907	16306.833	17221.299	11978.242	10834.549	9839.319	10285.457	12433.313
X603141964F1	4862.230	5140.775	5419.755	4157.788	6330.045	5709.466	4391.535	3197.573	6635.215	4686.379	4990.251	5711.309	3913.172	4235.206	5780.674	5640.154	4246.200	5583.126	5267.574	6597.999	6047.371	7433.597	5890.019	4893.162	5434.820	6251.553	5593.955	5793.886	6106.939	6313.349	5344.011	5371.769	3503.111	2727.068	5229.678	6949.080	6740.290	6374.507	4299.830
X603141965F1	52.50501	206.48646	281.09046	86.93873	192.14717	269.53116	118.81487	90.91462	298.83506	33.03847	147.25075	223.59258	122.06077	19.38124	209.88981	246.99945	64.56658	247.59787	223.87668	224.28271	503.12988	261.50172	265.33640	138.72950	239.32192	277.38301	183.57897	210.65642	164.11728	239.65187	244.99689	244.66705	47.88427	24.98749	211.38524	254.57017	286.71273	222.98436	256.34153
X603141966F1	12713.906	8521.564	9468.111	13010.364	6471.164	8740.976	9605.800	11799.701	5670.236	13209.975	8913.104	8456.636	11608.073	11741.059	6293.227	9063.399	15580.278	9459.476	7243.600	6752.991	7918.391	4847.582	9790.278	9204.430	7908.877	8905.596	8291.874	7508.436	7710.723	7696.263	8913.734	6743.013	11234.113	15811.194	7385.153	9273.912	5554.007	5687.517	6822.179
X603141972F1	22826.47	27858.90	28184.13	24512.31	20828.60	25927.66	25195.29	23676.31	23086.33	24123.19	22161.18	21186.69	23705.33	26195.00	23645.57	26473.84	25339.95	26539.35	27772.48	24100.61	18730.40	26739.64	26175.01	27606.44	23074.48	27519.77	24698.30	26669.17	20651.69	18022.69	26257.42	25801.98	23690.61	22567.69	25149.92	19808.27	23612.05	21458.57	26175.01
X603141973F1	19105.66	16021.36	16706.41	19063.94	15248.71	15861.87	15038.37	19664.48	16402.47	18833.79	16144.99	16229.90	19760.37	15811.18	15409.91	14208.09	16791.68	15030.19	12634.56	13693.76	16177.61	14305.46	16667.71	16455.14	17059.37	16280.93	14507.99	14526.80	16940.40	17217.24	15023.62	18625.82	19373.11	17880.42	12529.40	16090.78	12530.71	13235.08	13841.09
X603141974F1	55.32994	86.70410	102.09894	85.68327	49.16078	96.18752	68.57181	48.31427	43.47792	64.24333	52.93105	43.70578	72.96468	41.23786	51.14070	89.56305	53.32152	107.37893	107.89891	44.54515	56.62213	53.03638	49.14143	80.18739	63.40221	81.55682	78.76437	56.84894	44.00809	41.25864	115.81616	44.54515	42.57375	52.27940	110.10205	46.90568	51.79419	45.96755	45.86171
X603141976F1	501.5203	683.7039	1023.4668	648.5619	1101.8149	804.5562	815.7916	511.6314	791.7025	665.9765	660.1463	902.1408	581.6271	285.6459	845.5312	1008.7685	570.9621	998.9533	945.0294	1079.6636	890.6898	927.0039	1135.2756	520.3730	941.7338	993.8346	847.0138	886.3317	887.5363	806.9780	859.3259	780.1247	368.8248	177.1569	928.4263	1093.1363	1055.5510	745.1364	756.0364
X603141977F1	9076.373	6999.140	6406.225	10125.530	8160.217	5916.006	5703.771	9049.087	15161.484	9898.953	4798.697	6064.377	11950.605	16456.066	5913.976	5398.652	9364.045	4745.725	5788.315	8368.745	10527.290	5780.335	6475.691	5708.722	9392.034	6812.932	4680.597	8945.801	6073.175	10287.522	6094.190	6196.111	11112.783	8787.538	8838.058	6051.927	6112.027	6465.468	8719.987
X603141980F1	3804.633	6017.600	3515.005	2939.350	2418.180	2323.733	2247.377	5802.233	2158.577	1634.158	2048.052	2290.595	6419.922	4122.693	1558.749	2962.585	4249.913	2290.838	4474.718	4060.383	4219.341	4095.049	2722.483	3628.410	4793.519	5104.136	3658.118	2809.061	2952.356	4409.704	1506.930	3604.790	3979.633	6691.008	1111.121	1039.524	3164.301	2749.438	5516.261
X603141981F1	19416.76	20225.77	22378.66	20555.17	19230.50	18149.56	19862.62	20389.74	18468.31	19286.41	18251.42	19195.79	21316.18	20513.37	17506.17	18493.95	18068.97	20479.96	18703.92	19181.39	19043.54	16805.44	20260.71	19804.30	21985.46	21626.72	19870.02	19437.56	20810.10	19268.72	19282.90	17928.95	22355.15	21794.44	18201.35	17812.93	16805.44	17157.16	17372.29
X603141986F1	2200.920	2399.224	2373.301	2943.188	2684.363	3656.303	1649.316	3084.957	2014.706	2552.078	2836.380	2383.834	3565.225	3162.549	2430.560	3069.953	2491.832	2452.610	2273.129	2726.336	2750.701	2234.253	2322.416	2132.769	2256.442	2307.144	1819.719	2382.139	2011.909	1673.360	2958.554	2123.955	3231.419	2491.140	3055.631	2607.579	2572.139	1827.132	2467.746
X603141987F1	9162.495	10358.030	9824.278	10617.092	6819.608	6787.068	8500.064	11117.961	11604.493	10308.868	7480.919	9177.252	5524.070	7037.201	8639.770	8473.769	9919.034	10806.181	8662.939	6092.862	6243.236	10472.054	5712.239	8819.587	10015.889	11418.671	9392.339	7497.595	9964.342	9297.580	9248.050	11037.727	9132.471	8530.833	10808.938	6729.940	7559.143	9301.775	9351.730
X603141988F1	4890.342	7634.319	5214.665	5895.049	7029.630	7622.028	7828.804	6251.613	6768.623	4216.868	11015.558	7295.667	6497.014	4062.132	7871.830	7492.623	4645.464	7521.303	7642.638	6611.985	7436.842	7616.512	6797.879	7345.013	5873.308	7473.437	7962.965	5824.648	6883.025	7292.204	6940.367	7744.303	7085.504	5537.434	7390.751	7457.027	7781.093	7918.215	5245.365
X603141989F1	338.2332	561.9817	776.9285	510.4371	771.3770	838.0379	545.8812	499.4713	900.0329	369.0802	591.0613	687.9839	381.4579	467.8131	980.6633	909.9796	373.1443	792.2178	1077.5399	1123.3290	689.3979	971.8624	768.7907	697.4420	1042.6291	756.9740	676.4865	804.8705	700.3134	637.6026	625.8248	873.8763	315.7429	472.0971	911.2544	869.0932	865.4054	740.3846	982.1298
X603141990F1	108.87108	123.35268	69.48932	74.45890	104.11980	122.57963	111.33737	73.24016	99.51782	78.52799	94.90163	104.05153	84.48144	139.07715	85.31660	86.21124	102.99438	129.46979	113.26349	74.06506	114.00973	93.90026	147.34362	164.95657	84.49791	107.96993	134.90990	103.34645	108.94783	90.65369	105.96627	84.93036	89.76728	94.40207	87.71813	118.71070	101.92972	112.24195	93.31261
X603141991F1	223.7867	327.6791	566.7664	424.4681	474.1226	570.8476	298.3464	447.8796	545.2362	143.9079	379.1841	529.8126	485.8896	248.1484	350.1926	469.8815	384.7390	531.4806	416.0115	562.4878	501.0910	503.6680	635.4718	520.5291	657.2833	585.0287	460.6134	440.7771	457.8333	494.0996	442.1751	399.8325	182.3128	269.0296	359.1515	530.3307	429.3094	420.5257	472.0647
X603141992F1	1185.9494	1338.5298	468.7570	1148.9573	759.4438	930.2682	1405.3105	1200.1182	1459.5533	1525.6121	868.7121	1124.2441	351.9422	353.2181	872.8482	1265.3795	1422.8057	1260.4255	1074.5784	545.8291	458.4805	980.8102	834.2215	1344.0312	1107.5928	1183.1540	1349.2268	975.4866	1085.2910	885.5535	1123.0947	1580.2496	1020.9921	789.1678	1396.2937	767.4230	748.7633	1419.9822	846.5527
X603141993F1	13579.72	15822.10	14571.67	13624.68	13316.16	14856.71	12023.38	13358.05	11660.62	13241.84	12979.92	13442.15	18610.66	11458.11	11408.87	13672.36	13014.24	13577.44	14208.70	12993.82	12231.90	13108.70	13361.92	13306.62	13782.04	13148.06	13417.37	11915.94	11499.13	14389.73	13095.92	14001.16	16020.06	16711.22	13119.85	14854.27	13090.88	14312.08	13945.09
X603141994F1	9.482807	20.477173	21.657531	12.559694	14.026643	22.626473	18.522554	17.123244	14.361598	11.149444	20.889653	17.059233	13.211426	11.530849	16.222371	16.408420	11.221756	17.812839	15.022923	15.379167	15.940178	13.216745	34.699721	22.834728	19.230759	15.862036	15.326800	17.575138	13.231882	11.083677	16.358916	11.807416	12.965338	10.829611	13.340607	15.856819	12.643460	12.738173	15.172151
X603141996F1	3888.1186	10168.9641	5446.8425	3645.5385	9395.8789	5020.4687	6810.5079	2431.2758	11979.0499	2811.7748	3477.2390	5885.9206	993.6825	5340.0966	5304.5982	5372.0902	2296.8491	5275.1468	6053.2170	8213.3305	9229.6564	6043.3157	6301.1437	6611.6689	7964.6584	5092.6747	6477.4517	7484.9118	7624.8789	14840.4773	5575.5250	5103.1751	1995.5868	3058.3061	10156.6042	6415.7692	9019.5905	8119.1388	9286.6814
X603142002F1	4314.043	4467.008	4928.776	4805.941	3621.692	5712.282	3611.001	5071.007	3248.744	3939.512	4534.063	4740.801	6318.911	4031.482	4081.969	4983.088	5354.911	4271.153	3876.356	3753.873	3855.312	4713.765	4424.177	5010.210	3582.583	4981.702	3948.564	3441.397	4089.192	4175.538	5088.521	4370.169	5133.478	5214.517	4099.893	4101.000	3369.858	4225.928	3143.302
X603142003F1	7813.84116	340.97786	484.04920	2954.13788	512.96079	478.81601	946.02322	1434.49331	292.91194	6741.74392	595.21522	408.37280	2857.28729	6413.76484	334.89545	477.24817	4814.36060	436.69799	743.99779	510.10468	597.09869	127.42913	288.93233	755.14231	391.65886	473.48210	678.03580	495.24883	167.57302	154.99164	461.01300	93.76595	3591.68858	7191.66797	451.96863	320.08358	242.64863	313.81537	404.93914
X603142004F1	19238.69	15260.36	15796.59	18771.33	14421.12	15288.53	12646.49	17441.40	16436.76	20211.14	14724.12	14215.00	17581.54	17464.89	15702.13	13381.18	18147.65	13205.12	12390.21	13367.90	16353.48	14507.96	15706.14	16494.62	15408.72	15049.99	13268.65	13133.21	15787.08	14596.54	13523.68	16516.62	14941.49	16801.39	11555.53	14952.89	12811.51	13390.47	13789.81
X603142005F1	8473.269	8087.285	10415.706	10369.010	10230.587	10321.650	8892.917	8010.071	9053.232	9245.441	13113.279	9154.855	10994.307	14643.760	9174.563	9946.247	7778.977	8559.660	7861.189	9396.198	10456.417	8198.269	8911.351	7522.520	10403.258	9502.326	7967.826	9816.249	8059.720	7163.267	10000.428	10171.682	9029.252	7605.025	9059.884	9284.472	8690.550	8900.498	10263.513
X603142006F1	685.3265	733.4215	1102.5912	1068.6102	919.5805	700.2386	628.5945	863.6071	849.1968	590.8059	636.0092	728.3144	1066.5524	736.5986	816.0326	858.7906	657.4426	623.1419	811.0052	851.0856	742.8658	884.0341	839.5666	678.2971	880.5723	951.4876	606.4856	998.2819	799.8451	840.9155	930.4537	1165.9506	693.2310	691.6785	1043.0779	753.7377	933.8427	1199.7445	924.1997
X603142007F1	519.0615	205.3194	257.8624	281.1031	288.8062	240.3186	319.4091	170.6535	702.7798	451.4592	256.0637	252.9356	161.0613	357.1786	269.5798	223.4037	414.7316	242.6134	269.5798	267.9765	359.3798	347.9535	269.2131	310.9987	197.2927	243.9421	217.3373	155.1089	278.3594	348.6845	150.5916	264.6496	109.6578	739.1400	184.9014	320.4223	296.4052	329.4999	268.9939
X603142008F1	1049.5990	731.9512	1149.0638	1522.9300	1239.4132	974.8593	492.3084	886.3535	724.9999	1278.9742	886.6926	591.2924	1652.8586	2550.6762	1058.1561	1133.1645	955.5948	854.7591	646.7211	803.9090	740.5866	602.1572	724.0291	844.6044	813.0611	657.0770	750.4541	699.5817	509.3672	650.3850	843.4350	600.5239	1246.7065	1619.9693	1098.6219	876.0265	673.6251	1047.7028	823.9524
X603142010F1	1267.4334	794.8252	1325.2189	1782.8684	1781.4532	1115.5173	797.2265	1658.6053	1325.8192	1503.9335	1084.7996	1081.8917	2875.8432	3803.7893	893.9129	1312.9670	1555.0181	1102.2450	893.5143	2129.8867	992.0871	1147.9361	1233.1413	774.7621	1161.2709	981.8444	1775.4737	1155.2701	801.0513	862.9251	1162.6034	1087.7011	1684.5631	909.0110	1388.0706	1885.4722	1770.4287	1117.8342	1386.4041
X603142012F1	47.87851	197.87285	218.40661	107.16839	136.13785	142.60163	96.43816	82.54341	242.36004	92.60887	163.32990	147.99281	23.36797	17.26648	174.71565	122.73569	94.54128	200.05813	161.12835	113.40501	195.52287	226.20248	142.35886	204.02734	192.22786	243.42225	198.68781	152.83597	180.92370	128.01389	158.67720	267.94041	34.25787	26.08794	160.85263	108.38842	137.97206	133.46532	148.50350
X603142013F1	114.75170	139.60709	154.75858	103.61022	104.75343	123.80695	147.24838	258.19442	NA	213.33375	476.37782	106.00671	72.98069	3.34243	78.07383	204.33960	358.68108	184.39068	139.45784	99.73372	492.82737	168.22193	154.86592	195.00868	168.60510	327.18005	173.04937	141.02558	108.42589	59.54389	120.88528	173.20218	89.64266	116.28847	137.22532	65.12809	141.76939	71.07928	110.19702
X603142014F1	1135.4707	2253.4223	2501.8703	1158.5314	3196.3336	2264.4337	2676.9143	1125.9678	3141.0683	1391.8851	2655.7241	3161.8234	1497.6473	1860.9938	3645.1184	2372.6603	629.3497	2051.8698	1705.2094	2809.2482	2608.5531	3633.1037	3538.9850	1627.6667	3133.1076	2198.6370	2509.6306	3606.2555	3625.6267	2264.0968	1941.3928	2587.4644	862.8230	713.6990	2847.9424	2898.1987	4341.1234	3357.6014	3748.5609
X603142015F1	1144.1984	2150.1303	1867.1457	1799.4134	1708.6417	2437.8045	1337.6127	1429.7035	1532.8884	1031.8018	1813.7747	1924.5858	2493.8486	824.4795	1558.4660	1670.8156	1180.1898	2030.9587	1826.6271	2034.4566	1424.2590	1733.2255	1991.4931	2570.2692	1769.3045	2176.3348	1738.7786	1799.8107	1244.0085	1631.0993	1813.2102	1844.4516	1593.6231	1204.5516	1978.1403	2068.6558	2099.0667	1524.2078	1995.5002
X603142017F1	175.63968	116.62800	88.54891	102.33698	94.37286	133.83571	278.79100	113.77644	86.46603	132.99719	120.98351	132.27604	109.77247	158.17176	143.06970	110.53608	103.30761	152.78199	111.55482	93.73469	111.82608	70.89995	161.66388	227.64882	75.33005	88.05148	119.78650	81.75944	107.33550	72.02212	118.25310	82.69812	154.18408	220.24872	66.64967	98.29715	86.65828	83.44536	118.41501
X603142018F1	123.69696	125.85954	102.98521	83.54065	68.66036	167.92492	62.02840	209.87276	164.47081	43.45696	151.86207	242.31527	148.60195	55.89431	54.58428	210.19600	160.91729	191.71752	315.03248	174.09850	449.67811	175.06275	162.27545	71.61910	192.60304	170.49404	103.37225	66.24252	113.58209	88.72190	153.29325	211.73476	51.08575	68.95207	123.83337	60.87969	99.75036	70.75750	236.06120
X603142019F1	96.697397	320.685262	225.855983	216.601414	131.876724	137.801443	119.610564	197.422853	803.736810	11.898765	110.336468	135.257753	417.260484	-18.802164	71.890913	260.418445	94.526440	349.601959	293.761203	284.016304	347.703670	227.260064	192.892677	76.411688	356.901716	276.275697	172.849116	233.120091	173.363817	269.455222	198.216275	293.510258	201.730507	1.363478	243.406318	114.798337	139.242853	102.223087	216.410153
X603142020F1	13661.274	12257.129	10565.592	12441.007	9964.393	11247.336	10737.853	12926.735	8432.381	13145.343	13923.915	11227.180	13143.674	11171.608	10388.079	10202.439	14098.201	10790.879	11044.851	9990.353	9007.770	9408.142	9537.388	10843.321	11438.472	9364.295	10634.435	10899.314	9342.272	11229.846	9664.090	9837.979	14358.872	13460.437	10755.618	9435.877	9556.317	10432.856	8841.912
X603142021F1	5234.626	6933.723	7487.053	4951.674	4188.371	6592.213	7754.521	5613.414	3493.832	6225.608	8028.076	4396.230	6492.191	5098.419	4119.804	5879.787	6378.177	6929.175	4240.262	3929.557	5173.779	3366.527	5995.446	6830.143	4845.045	6071.309	5178.399	5084.848	4111.657	3539.380	5906.010	2139.728	5751.474	5306.468	4376.118	4499.176	2708.865	2669.135	3265.590
X603142022F1	144.38964	133.90520	187.04755	288.79172	186.75060	132.74727	158.40468	220.05349	153.77042	211.54678	157.78260	117.17693	276.46695	267.91433	105.53467	153.55920	433.66898	171.25701	166.08600	128.22291	318.44031	142.32913	117.85050	136.09387	138.74923	168.54422	140.08440	125.82884	103.50937	141.99619	119.38924	107.74445	267.53320	344.70281	165.56828	109.52656	95.10444	117.69941	122.26227
X603142023F1	22418.27	24021.16	24269.03	23032.38	23878.51	22784.77	20124.99	21019.07	21052.65	21878.62	22749.34	21158.44	25821.06	28537.02	20995.22	21854.74	21028.36	22443.29	21162.61	21555.66	21824.59	21396.98	20715.05	21318.76	21701.70	21194.23	19246.32	22695.51	19586.72	22009.14	22089.33	23012.18	21854.19	21886.00	23524.59	20839.87	22726.99	23508.50	25463.95
X603142024F1	9712.506	15153.907	12713.570	8616.628	18456.380	16217.824	15946.964	7551.396	13283.407	9783.994	13190.274	14697.717	6496.149	8062.956	16651.469	18774.745	8563.932	16371.565	13811.470	16598.454	17246.766	11625.151	18014.841	12414.163	12987.524	16535.210	17638.732	12051.791	17028.956	13995.596	19309.315	16450.485	5583.060	7798.973	13648.465	20096.830	16112.824	13254.247	14477.051
X603142025F1	460.4743	1646.2025	1427.9122	420.2412	971.2457	1408.8773	2995.6736	453.1231	985.5673	211.9380	1970.3990	1150.2095	202.8464	166.1865	2613.8840	1022.4173	274.3585	1231.9951	931.3261	1637.2638	1491.4271	1416.2359	1779.5705	2494.7434	746.3581	605.9701	1087.6872	1156.0420	1988.9171	1584.9898	1307.3263	1005.6981	156.9345	422.1720	463.4114	1902.4409	1430.5691	2068.4058	711.5272
X603142026F1	592.1802	772.3180	881.3094	783.7216	582.9834	1001.7227	422.6118	993.6864	605.4030	855.3655	729.4896	653.8914	1437.3040	812.5030	657.4716	610.8363	1182.2872	752.6176	633.3448	652.3422	590.0196	626.3360	660.4376	643.2571	694.4767	890.9822	872.0178	611.9903	459.4276	505.7815	702.0763	723.5700	985.1469	725.2423	744.1052	698.3069	722.8369	652.3778	731.0279
X603142027F1	5959.059	7730.875	9289.467	6162.110	8584.617	7739.873	8520.165	6108.944	7632.481	5815.295	8317.536	7925.140	5910.071	5694.079	7649.058	8221.189	5137.318	8738.174	8134.545	8653.925	7579.408	7822.450	7974.106	7327.273	8054.666	8731.572	7622.572	7544.577	7673.183	7371.783	7580.013	7553.568	5595.177	5190.021	8374.551	7650.755	8906.217	7892.596	8486.329
X603142028F1	120.518499	1228.263323	1605.952380	245.865725	596.822264	1289.093068	1505.163733	180.766855	339.769320	45.608004	2232.296072	729.728855	48.526813	-25.954740	534.590209	814.295885	76.856540	1201.682178	676.529913	454.954563	508.244139	284.101547	950.919729	1539.200405	686.999535	770.468535	827.032811	816.816257	275.813582	450.352920	925.984920	218.824609	-2.633404	-4.439004	537.574280	701.661060	519.139565	512.854202	548.991575
X603142029F1	310.63619	189.33486	178.63136	202.06277	331.09228	176.58233	171.09595	227.11547	200.18095	67.81664	4654.95565	432.12998	46.42658	64.72350	104.94100	63.92512	97.29784	66.74538	981.36435	77.59108	3664.12377	55.30087	65.72535	55.53805	217.06714	69.37378	78.22893	80.52950	122.26987	808.21279	48.43161	122.25225	42.73549	26.67184	185.42885	91.27514	79.25544	229.08142	108.39063
X603142030F1	102.63429	198.08157	379.68168	90.85380	103.68898	227.29909	236.25336	60.85383	107.01161	94.15193	493.45100	101.77542	125.22939	108.92026	123.03194	157.67007	84.40262	213.30154	115.34663	91.32010	103.56969	102.33937	125.89981	328.04684	136.49645	145.61170	141.10158	135.85257	83.05316	74.81669	172.43371	89.98570	84.21119	51.37397	95.83622	98.86813	114.22421	105.70893	109.06321
X603142031F1	5602.683	6932.919	7898.568	5390.475	7753.705	7588.396	6707.927	5214.382	10871.805	5349.836	7641.718	6904.930	5392.064	7880.221	8227.522	7161.106	4581.313	5635.510	5982.735	8605.851	10052.138	8044.441	6934.010	6132.864	8918.531	5987.235	5614.656	10548.316	6829.795	6771.474	7171.224	6146.372	3569.508	4299.965	6811.781	7753.281	8044.441	7097.785	9427.374
X603142032F1	52.74138	149.22886	200.80803	141.23559	130.83239	234.37004	75.30493	103.78951	116.41699	54.30167	132.57032	167.60720	122.29911	17.70398	100.96929	189.02273	58.12140	162.01648	111.79777	113.93690	101.52049	87.19789	196.54209	125.40023	146.33369	186.71065	119.88178	112.72666	90.71610	125.02286	195.92080	121.21441	49.70028	27.57622	146.37980	190.35341	101.64581	144.08052	126.81880
X603142033F1	2153.694	2666.334	3758.049	2945.159	3426.363	3172.894	2193.075	2539.816	2793.793	1886.483	3050.758	2989.389	3462.688	2600.753	2278.918	2287.981	2224.852	2732.898	2439.313	3413.084	2949.081	2837.669	3756.592	2267.545	3195.452	3033.837	2505.641	2983.366	2837.057	3367.496	2777.944	2948.119	2680.439	2482.697	3246.907	2936.995	2416.707	2610.078	3602.172
X603142034F1	3052.163	3705.360	3965.099	2299.915	3615.526	4878.000	2809.803	2741.770	4417.373	2156.612	3893.039	3428.843	3762.600	6782.205	3671.192	3327.109	1878.115	3053.479	3121.148	3487.809	3969.545	3552.912	3739.131	4405.283	3424.509	3542.839	2764.053	3716.768	3234.055	3165.599	3823.477	3594.077	2461.651	3748.158	3237.848	3814.117	3400.015	3348.588	3558.172
X603142035F1	407.3670	519.3811	965.2230	590.7553	636.0439	756.6959	388.0989	672.6891	644.9934	358.1903	739.8168	775.1360	723.9959	356.1538	549.1725	560.5515	393.4426	665.6809	562.3268	665.7310	614.1451	527.0697	744.5488	504.2378	787.2316	861.6785	565.2878	715.5999	467.1347	571.8293	778.5843	675.6085	363.4610	273.5421	461.0344	854.6573	880.1622	794.6809	575.2724
X603142036F1	2207.033	2189.824	1439.244	1827.317	1702.276	1967.145	2374.197	1388.091	1753.397	2363.136	2216.802	1905.474	1429.335	1838.313	1836.514	1830.785	2240.273	2287.468	2034.999	1574.422	1416.310	1764.246	1854.542	2792.864	2085.269	2296.716	2368.210	2007.627	1594.500	1668.202	2010.608	1659.404	2107.882	2410.418	2420.079	1873.235	1405.758	1830.546	1479.240
X603142037F1	27.11487	20.41410	28.56342	18.48690	31.27121	30.27505	23.30041	18.19404	33.23746	26.55699	31.66267	20.99665	12.49949	25.21837	33.33029	25.18869	23.86817	33.79390	25.55883	31.41949	32.90128	34.96481	25.60028	30.23561	33.07625	28.78249	25.77263	34.57001	28.24745	25.48800	26.70750	28.73370	11.70869	21.07986	30.20603	31.03898	21.99612	38.96518	40.74779
X603142039F1	332.9811	848.3906	333.4452	643.2719	1154.4859	802.2000	649.6560	713.5045	653.5263	511.4722	1109.1054	1013.7051	534.8860	733.7201	1308.2701	640.6430	780.7998	1099.7249	281.0244	863.4887	1035.6041	538.9432	883.7118	831.1134	594.7501	633.2290	749.8064	636.0071	1257.7655	975.8433	673.1113	1113.2930	692.3436	523.4981	418.8845	561.4609	552.7432	485.4177	721.1689
X603142040F1	322.5825	351.7961	386.0847	481.2063	322.0016	346.3176	286.7485	516.5634	262.9125	481.6838	471.3424	332.8298	538.5820	509.0299	378.7697	379.5219	336.5455	326.6130	287.4133	336.9720	281.6029	306.1813	324.2642	336.2208	345.4470	311.4118	337.2746	327.8340	297.0965	286.4123	310.1661	368.8212	455.0189	394.3692	351.1327	354.6022	374.6606	266.0927	327.9025
X603142041F1	10806.238	12339.747	11521.235	9827.355	13993.842	13251.945	12087.599	9870.251	11655.680	9552.626	12369.169	13703.697	10193.343	8158.356	9927.396	10679.527	9466.821	13544.701	11267.411	13482.154	10493.901	13484.425	15804.618	12694.997	12907.550	13820.267	13692.208	12600.451	13300.115	15593.645	10471.520	11401.476	11020.147	13118.158	10720.197	15132.557	12919.869	10442.767	11040.219
X603142042F1	9372.021	8219.809	9420.569	10697.987	10078.238	8847.152	6671.056	9456.604	10586.099	9350.097	8080.900	7777.539	12381.017	11730.078	10036.179	9059.865	9184.122	7858.285	7695.396	8929.272	8840.388	8749.078	8617.280	7186.616	8701.670	8279.514	6945.573	8514.074	7342.259	7811.769	8709.073	8013.683	9199.504	8466.628	11066.337	9009.113	8065.288	9550.919	9675.760
X603142043F1	13119.90	16176.47	16536.35	12831.84	18294.26	16252.44	14476.05	11872.95	14901.38	13999.29	15359.19	14490.43	14409.37	16935.55	14045.15	16551.07	11733.00	15409.56	16686.23	17344.65	17112.78	13450.84	15398.37	13113.24	16060.29	15639.73	14342.34	17333.37	14233.42	14195.91	16963.12	15861.27	10061.54	11323.96	18552.50	17148.08	16344.46	17119.71	19269.02
X603142044F1	22.41185	26.93531	28.92045	18.55534	26.24270	24.50839	28.60346	13.89643	23.77233	16.51299	34.99662	23.08273	13.20658	30.41675	19.74143	20.58950	29.82856	21.40456	27.74826	24.89661	25.47546	21.43726	23.81400	26.50689	19.30276	25.09856	18.51771	24.34933	21.76380	28.21497	26.14203	22.58539	28.04189	18.94216	18.88360	21.22452	20.28238	19.01993	15.45405
X603142045F1	1284.6342	167.1572	353.8453	536.9952	207.4802	272.3669	194.3294	292.3278	144.2382	797.3980	345.6863	180.3015	524.3562	978.8937	144.2486	212.2620	613.1156	281.5855	238.3709	217.7789	168.7004	133.2988	224.1925	207.2864	212.9913	256.1008	216.0141	209.3850	153.1784	132.1278	216.8740	107.6584	839.4577	1957.3430	168.4233	171.0926	154.1484	120.0301	146.1180
X603142046F1	347.76413	882.34153	1478.76589	977.20741	407.22944	1118.22148	788.58772	2239.83245	1017.79522	485.64041	1051.99798	863.77746	2154.41564	59.41628	382.07832	1067.47798	2418.79737	1163.79372	663.35120	537.72265	1172.60112	1131.90608	579.84107	490.98578	989.49045	2045.40434	1438.84733	409.83681	819.39815	769.02857	1232.32716	1108.12010	546.47871	554.00137	810.01428	784.13103	850.34686	646.82873	1125.76335
X603142047F1	710.4588	1260.8366	192.7848	1175.5727	783.1265	1858.9248	896.5154	1600.1580	414.1490	1787.6644	1803.6938	1152.6855	1147.2018	1040.8429	829.4309	1087.9438	1982.7997	873.2439	396.3685	381.6181	462.6632	329.9316	1597.3915	1517.4777	292.0598	547.2251	1165.7048	539.2994	1077.1692	1538.6942	854.0074	1002.2543	1825.1458	1431.9009	413.5714	399.7453	230.5979	361.1784	706.9620
X603142048F1	230.10222	62.31887	83.05311	118.28513	67.91098	69.18668	59.52953	66.95872	70.66330	116.87836	81.89566	73.17053	99.99242	227.58315	76.61906	46.32484	110.49769	91.21272	62.37419	59.29618	62.42169	86.96727	88.85794	79.48099	49.95956	86.58381	60.85557	48.90450	73.71866	65.29329	61.12034	73.23107	187.11832	218.13446	56.81500	88.61187	85.66788	47.66032	56.94782
X603142049F1	3070.645	2240.524	2649.118	2529.235	1909.604	1849.774	1948.227	2751.515	8759.267	2744.280	1656.628	3708.254	2681.697	1125.096	2546.025	1354.528	2494.083	1837.037	3201.220	2083.244	11071.145	2838.311	2556.837	1701.730	2249.443	3051.206	2414.160	2043.756	3190.444	5790.818	2025.335	2255.343	3654.471	3143.952	1581.533	2503.670	2461.416	1930.935	2047.471
X603142050F1	1239.403	1962.841	2771.370	1867.323	2393.360	2345.231	2111.228	1414.274	2252.249	1428.030	2371.542	1782.906	2068.837	3235.330	1682.387	2418.656	1342.684	2086.548	1985.244	2808.078	2095.888	1711.753	2634.363	2207.719	2057.943	2251.870	1731.494	2261.609	1485.692	1591.242	2387.507	1895.136	1168.065	1424.002	2862.733	2029.942	2185.361	1961.069	2454.532
X603142052F1	61.67624	91.95545	67.85422	70.58176	72.06222	84.64640	76.74107	55.76998	296.07253	51.56369	67.39992	111.36803	50.31690	45.49470	80.59466	84.37051	56.84840	113.78662	79.07353	91.55660	322.99742	68.06764	158.09103	82.52849	82.74694	124.02397	88.23589	85.26884	78.21492	289.47002	82.27314	61.31758	21.47573	69.39365	71.12031	116.96539	78.79485	63.98143	62.97870
X603142053F1	7388.544	7302.691	7490.319	7125.561	6232.354	6666.594	6218.097	8536.253	9096.622	8556.283	8964.601	7177.829	7234.780	5092.312	7636.822	7452.117	8002.594	6695.736	6368.828	6855.632	7405.804	10237.096	6625.691	6698.118	7602.078	7755.225	6993.218	7676.869	7928.738	6625.043	6341.096	6705.522	7738.628	7551.066	5541.809	7510.915	8446.307	5799.017	6627.877
X603142054F1	1159.0230	946.9141	911.0358	1341.1450	1110.3028	870.3438	972.8014	1161.9823	1871.5927	978.7630	1071.5309	960.4011	979.6321	1116.9919	911.7554	1178.6538	1806.5412	921.0174	696.3890	1144.2093	1974.9338	1120.8349	1202.6124	698.2175	866.1669	950.1017	1260.1190	931.7490	1111.3354	1214.3404	966.5263	883.9988	1310.9837	1083.1022	746.0561	1049.5353	1463.9402	829.8071	899.5019
X603142056F1	6649.073	5532.329	3037.363	6870.722	6274.786	5337.371	4702.628	7421.752	5513.680	6762.585	4477.746	5561.637	7869.878	7000.568	5003.687	4921.309	7178.389	5285.264	4930.290	5631.535	8341.925	4409.832	6088.259	5293.290	5532.646	5117.015	5761.637	5157.718	5860.908	7348.002	5116.586	4374.832	8545.683	10731.296	4896.937	5616.833	4697.975	5284.506	3987.016
X603142058F1	20.17308	27.49623	11.21421	14.74887	17.83786	10.84685	12.39087	19.85470	15.68203	18.51382	10.94279	13.56161	26.43866	20.19145	14.58204	10.18246	16.40095	12.90967	13.77545	12.75513	12.51860	17.19066	17.03129	11.10402	12.23746	15.35125	15.76249	15.24099	11.33869	13.60534	11.22788	15.16010	25.37932	26.27348	12.68366	14.31635	12.96864	11.19467	13.91487
X603142059F1	4717.560	3269.342	4411.350	4129.458	2219.079	2898.237	2587.818	4262.556	4596.832	4755.803	3022.009	2746.139	5704.256	3018.326	3089.129	3286.036	4936.373	3228.059	3988.863	3675.667	3594.294	4368.701	3949.271	2934.260	3858.839	3903.696	3174.681	2814.498	3587.737	1861.382	3544.577	3235.967	4501.953	4373.114	2596.340	3179.891	2860.879	2241.574	3519.727
X603142060F1	6516.891	7101.373	7993.639	7040.696	6482.547	9149.929	5789.036	7583.402	5859.081	7185.652	6646.783	6374.369	10038.239	9362.856	6167.552	6509.911	6808.826	6212.507	5275.220	6947.880	6676.163	5826.223	7289.843	7288.865	6767.235	6709.405	4829.387	6406.212	5381.481	5667.497	6508.714	5969.072	7857.584	6272.459	6860.829	6374.195	5708.089	5520.661	6843.340
X603142061F1	1303.714	1791.240	2152.076	1554.974	1823.182	1830.571	1456.735	1652.928	1476.527	1260.920	1617.103	1548.429	2033.464	1864.848	1473.143	1889.184	1338.781	1781.772	1578.094	2052.238	1666.428	1614.412	1817.374	1287.666	1842.223	1713.137	1510.386	1812.313	1358.675	1342.361	1716.225	1481.095	1669.715	1570.042	1821.096	1860.466	1835.492	1549.605	1591.725
X603142062F1	441.5823	415.5062	418.9082	646.9095	558.8870	347.9718	402.3016	404.8336	1497.9357	425.4975	404.8605	320.8717	469.9101	506.0235	477.1162	381.0646	437.6618	370.4383	747.1824	590.6812	1331.3572	521.5205	429.4110	330.0097	528.1151	385.9087	282.4242	407.6694	429.2797	957.7603	314.4917	373.5874	545.7181	443.4062	486.9926	336.1009	498.6945	410.6174	424.5816
X603142063F1	561.2885	603.8558	901.2961	406.4595	581.7397	625.1942	681.7515	466.5270	547.8108	372.4293	630.7882	709.8345	447.7026	642.1737	637.5786	945.4063	404.6118	616.3712	563.4992	483.5978	466.0017	655.8616	746.4138	639.0730	825.3256	724.7774	637.3529	641.4094	623.3855	687.2612	552.2055	761.4504	475.1488	877.3238	570.1149	735.1368	882.6096	612.8326	808.7958
X603142064F1	397.8324	488.8208	570.8505	933.5716	562.6479	597.8688	281.7121	852.6643	411.6413	554.4731	347.5548	392.7601	1585.1325	761.1973	551.3620	465.6558	496.6344	415.5518	371.2024	474.1268	410.7461	497.1811	517.1634	415.1603	446.7978	383.4653	334.9078	456.1735	328.9782	376.5167	483.9713	373.6736	574.0343	251.2241	560.2490	486.1473	461.3158	565.1197	469.8675
X603142065F1	8590.171	8302.383	8881.206	8658.150	7297.907	8371.596	7488.834	9449.141	9170.648	8640.563	9428.483	8184.933	9918.558	9514.690	6741.806	8042.835	9145.081	7676.546	8162.357	8151.756	8355.909	7463.898	8256.942	10463.166	8581.436	8564.519	7671.136	8803.033	6360.390	7378.926	8403.378	7023.962	9866.740	8394.170	8350.785	7627.442	7522.458	7509.038	8643.217
X603142066F1	24927.08	24438.88	20489.30	25587.19	20362.84	21750.04	24108.68	24913.00	22417.24	23321.36	28529.97	22679.90	22685.26	21934.14	23533.00	22775.83	29148.77	23687.27	25308.62	20380.91	26315.90	22861.60	19118.01	21158.61	23452.23	23623.98	25845.11	22807.79	23577.72	23880.25	23454.62	25057.60	22934.49	25385.67	24288.31	22316.15	23613.67	26688.40	20309.01
X603142067F1	2534.844	3172.449	4033.409	2668.304	2148.308	3215.357	3177.063	3091.449	2644.028	2489.320	3566.360	2844.884	2592.053	1129.854	2615.913	2623.995	3216.926	2756.545	1972.126	2298.447	2408.036	2279.234	2537.658	2820.034	3031.566	2922.089	2642.822	2436.185	2690.015	2633.168	2851.341	2429.597	3189.201	3068.216	1861.701	2593.683	2309.326	2158.402	2361.711
X603142068F1	211.62537	102.92521	115.98269	115.03064	110.45030	114.40245	135.65485	109.89958	96.29812	131.48077	NA	324.91860	56.84965	111.71120	76.99500	58.32134	116.72631	44.06243	66.04333	66.80756	45.16976	71.51007	79.91540	98.49922	39.46340	59.26603	70.01647	52.49521	61.11549	58.18814	59.62885	68.23447	89.20484	126.86583	63.24889	64.52925	61.77006	56.52199	72.55509
X603142069F1	5772.412	7846.938	7690.112	6063.587	4844.533	7408.796	7139.750	4789.014	3522.234	7325.381	8187.288	4427.782	6620.606	7754.302	4195.718	5576.191	6108.560	7734.211	4397.990	4385.565	4926.921	3170.771	5038.540	8489.447	4996.286	5957.508	5208.835	5040.856	3526.814	4008.398	5427.999	3046.756	5448.339	5584.994	4965.116	4442.122	3430.243	3541.984	3779.010
X603142070F1	6683.993	5219.705	6871.522	6638.879	7373.705	6405.317	5715.924	5888.445	5752.639	10082.217	5484.592	6858.397	6779.379	8736.194	5893.711	6069.500	7656.033	5482.452	5126.707	7565.604	5476.524	6697.106	7683.885	4983.814	5662.993	7572.153	6092.900	5992.229	5126.238	5132.595	6419.689	4576.547	5605.455	5155.360	5895.491	4592.968	4556.256	5442.749	7644.968
X603142071F1	18615.77	25512.01	24207.19	18318.39	27254.49	26689.90	24947.81	17810.12	27894.41	18546.16	34155.03	23968.88	17999.67	19636.08	24915.17	25149.31	17396.30	24165.67	25056.24	24296.68	25962.54	23476.96	23160.09	22004.83	23854.20	23596.33	24212.55	26284.63	23303.97	25738.72	21280.84	21786.62	15889.95	15100.57	27306.15	23698.33	25415.46	27477.43	25426.34
X603142073F1	995.1723	967.4661	941.0126	1411.9774	583.5719	789.5558	493.1351	1306.3317	825.9710	977.4930	816.3257	797.0233	1425.1996	692.2930	824.9414	973.6237	1540.0029	876.2127	1299.7133	742.7768	556.5823	1009.1412	579.5226	649.2498	1000.9864	1109.6532	974.1835	801.8360	585.2729	479.1992	960.5369	1137.4439	1400.9800	756.4200	991.5616	738.4647	872.0667	896.6116	655.2710
X603142074F1	716.8174	190.4201	176.6687	150.2581	291.8956	251.8424	221.9662	295.8419	169.4692	781.8973	158.8405	208.0309	488.6481	124.1774	281.4029	263.8070	596.4629	222.0282	222.3250	203.7445	262.7365	230.1703	253.7306	181.6856	176.4032	157.5490	258.6194	204.6320	203.3461	191.7936	265.3897	204.2683	774.8829	505.1543	133.4939	234.0352	220.2188	181.6340	152.8166
X603142075F1	129.99213	417.74839	529.39066	312.68507	379.34275	291.20965	294.06442	242.40528	362.84749	160.16673	334.24252	326.73526	226.29747	121.66670	326.89786	316.03688	268.16395	362.31843	418.02776	339.16988	262.40922	426.57277	240.98439	339.14577	500.44025	448.21331	372.05241	395.22287	295.07343	379.40709	412.13861	331.64395	115.83422	43.82331	497.90315	309.93171	280.85530	391.69425	377.85254
X603142076F1	81.90932	122.16604	113.99559	54.92618	106.03533	118.40135	116.58791	127.62791	64.62301	83.08556	109.95338	89.87080	78.89402	103.39293	98.78531	83.55762	129.30146	126.12485	88.23311	106.82761	96.81437	106.11975	85.64248	139.02172	67.66756	56.64441	110.06566	76.04836	105.04163	74.47517	97.90645	102.96288	161.61190	93.34924	107.15116	82.37791	78.91824	82.45713	118.57010
X603142077F1	1372.5045	1646.8588	1908.4865	2292.2100	2179.4705	1911.2720	1340.0207	1564.8969	1456.5670	1414.4962	867.0518	1361.0819	1431.7424	1260.9600	1191.9770	2496.9663	2048.7208	1583.9380	2093.2948	2395.5417	1803.6854	1880.7921	2224.0171	1918.9735	1792.0059	1410.7612	1284.4088	1762.5499	1724.7044	1345.7547	2174.4920	2393.2326	1000.2814	1493.0008	1954.0308	2595.5869	1581.8055	1491.6690	1963.9605
X603142078F1	1190.3303	883.8931	775.1673	1561.2234	599.4750	695.2681	537.4149	1783.0902	2746.6539	714.1564	409.4964	610.8440	2520.3546	829.2698	565.1105	722.2212	1733.7817	548.8763	992.1630	1209.4677	1773.0991	840.9842	802.5000	535.1965	1106.3839	929.2378	703.8128	881.9651	598.3436	3233.6461	533.6628	887.8900	1423.6456	1399.8633	591.1523	536.7416	1055.3287	841.9674	963.4348
X603142079F1	13523.91	15418.61	16582.33	11769.55	14733.05	18331.91	13877.04	12644.24	17425.79	11634.61	10273.26	13240.64	12441.73	12845.97	16745.34	16315.42	13630.83	15297.80	15858.23	13255.56	17839.39	16164.15	16817.16	13578.86	15905.90	14463.82	12631.47	12937.32	16752.02	13710.81	18179.55	16489.32	11839.37	10293.53	17751.75	17563.41	16130.06	14909.66	13179.13
X603142080F1	90.08343	120.46056	95.23288	67.81564	114.81592	140.97142	97.30023	40.65923	99.92999	56.06813	131.51993	148.49793	42.18117	89.69863	102.57580	106.50705	54.12925	90.58457	109.00039	84.78110	114.57998	93.36585	150.41189	136.68156	92.99711	99.34856	107.90512	105.15173	113.13111	113.15183	105.57707	108.26161	56.23472	82.96179	88.19854	156.89576	214.94672	161.15611	87.03083
X603142081F1	564.0908	656.8979	1286.1464	575.2414	754.2771	842.3825	899.1115	650.1927	641.8497	732.0975	797.3928	603.3426	486.5795	706.3961	568.6311	1050.5402	594.9011	920.4430	1122.6327	1320.9610	703.7385	873.1779	930.7363	760.3790	1043.4691	759.6410	832.2553	1524.3187	703.8817	459.2956	839.2792	602.6223	614.1805	508.5962	726.4726	818.4172	1086.5430	662.4515	839.2465
X603142082F1	1582.0073	2765.7982	808.5210	3779.2562	2023.1572	2500.5401	3256.6853	3510.2445	1553.3628	3272.2790	2683.8845	1976.1493	3504.4844	2686.7157	2199.5725	2593.6086	3693.0258	3141.8708	1712.5370	1777.8507	581.2526	1821.4376	2443.6736	678.0295	2054.5141	2312.1434	2543.8186	2455.3435	1664.9559	1779.8683	1835.2406	1477.4715	4790.0331	2813.5430	2296.8283	2266.4147	2026.7778	106.7773	1813.7105
X603142083F1	20.23671	24.49099	30.48447	28.16958	24.59122	29.08287	22.43445	26.33098	34.02380	24.35827	35.70491	32.65623	37.27141	20.58898	27.34397	39.46048	24.17962	26.80781	24.90744	26.05035	29.97666	30.61105	21.14136	23.75232	28.08471	32.67365	22.16359	27.49478	27.19856	30.77558	30.44071	25.65730	25.53362	24.38792	39.91262	30.92560	28.80492	28.29330	24.30910
X603142084F1	19659.83	23561.22	24298.96	19534.37	18335.92	22132.83	21431.14	23111.76	19111.36	20736.14	18381.24	20059.99	19559.42	21866.22	20088.17	24425.60	21294.13	23237.15	21853.52	22124.15	15584.30	20185.81	24764.60	21734.87	21035.04	24347.04	21170.50	22000.39	20397.37	16473.12	22836.80	22319.83	19775.92	17869.46	21010.75	20274.55	16528.18	16157.88	17983.95
X603142085F1	5779.696	7351.047	12247.148	7026.596	6844.754	9543.266	9063.228	5759.467	4448.694	6174.694	9789.297	8458.189	4181.657	8486.819	9654.025	7064.127	5169.239	7236.889	4296.244	8966.746	7189.913	4481.346	6860.180	12742.632	9501.582	7240.714	8457.550	9692.417	5984.193	6597.813	8248.877	9165.609	4206.853	4376.391	9561.187	9685.186	10353.876	10571.484	5858.453
X603142086F1	906.0070	692.1874	754.2441	904.7179	798.2908	778.6503	1222.8741	841.4074	363.4279	974.0163	1117.4328	475.3880	486.3793	805.7542	742.5889	710.9179	1064.2481	532.7477	575.7809	740.8051	586.3868	746.3342	605.8776	1511.1115	448.3883	364.2035	750.4653	692.9584	743.1532	490.5470	459.3341	716.2301	987.6417	946.6331	678.0292	629.4133	645.0583	720.1404	535.3205
X603142087F1	7327.816	5983.500	7299.043	8099.118	5151.886	5088.708	5892.889	8050.393	5905.024	7892.496	5607.083	4639.391	6878.400	7267.414	5630.087	5951.669	9104.395	6639.993	7199.082	5894.191	7037.542	5271.104	4120.957	5743.822	7062.394	6679.223	6372.737	6465.400	4325.684	4966.350	5959.587	5828.843	7693.711	6614.195	6618.625	4600.184	5674.031	5454.949	5993.796
X603142088F1	8520.551	10353.860	11169.107	7424.017	7326.336	10476.074	8333.926	8244.126	6641.508	9264.518	10335.537	6227.960	10828.047	8908.591	7784.360	7122.307	10474.112	7520.662	7690.321	7016.308	7683.272	10604.185	9304.441	10989.726	7830.847	9197.163	7246.661	8448.711	6289.423	7842.070	8046.393	5796.841	6881.846	7408.377	6687.423	6555.568	4966.143	4899.376	6434.461
X603142089F1	6499.088	5056.444	6253.963	6777.882	7092.207	3017.078	3694.643	8940.759	7262.882	3137.237	2802.409	7080.979	6909.742	8411.735	7112.677	5054.638	5380.247	7817.644	6884.533	6352.716	11486.656	8317.562	2243.002	3745.256	7223.817	10772.004	8974.134	8825.684	4154.509	5790.360	7553.158	2970.542	2662.047	2243.002	8573.685	10429.858	6646.937	9500.186	7240.568
X603142090F1	6330.865	4366.674	6787.313	6908.699	3602.682	4623.381	4900.339	8521.676	4018.638	7255.001	5256.926	5052.467	8168.338	5589.072	5840.345	4052.115	7967.631	4347.896	5030.779	4166.943	4082.941	6596.929	3564.388	3958.045	4738.602	6934.619	5116.101	5244.563	5340.838	5098.339	3967.755	4623.497	9187.303	5649.724	4169.076	4553.489	5654.366	5648.758	5644.184
X603142091F1	3749.752	4681.480	5829.941	3621.412	6518.200	4759.782	4446.249	3370.901	6232.595	3515.234	4720.844	4838.152	3070.139	3431.395	6306.656	5487.580	3407.440	4744.394	5727.708	6667.269	6264.454	6027.497	6056.324	3949.040	5680.864	5017.931	4551.792	5832.593	6152.399	5532.622	5055.962	5034.608	2781.488	2492.744	5661.129	6162.523	6872.890	5763.050	5674.093
X603142092F1	456.5684	213.6588	306.1999	287.4479	253.9228	294.7133	217.2407	249.0316	161.4701	287.4517	288.8204	258.5210	404.6574	645.6232	226.9334	275.2482	354.7568	255.7421	199.0812	225.2447	214.2174	216.8911	248.6022	178.5967	202.6923	180.5639	224.9146	247.7594	204.8609	197.5626	273.4838	258.7435	489.2689	512.8472	211.4271	295.2030	266.3044	220.9122	219.6369
X603142094F1	163.38363	108.52236	98.85743	131.83484	111.44495	124.40353	100.52681	133.55311	102.28833	207.18466	131.39343	153.88217	126.32831	202.16950	158.19217	130.53382	150.73512	111.35521	130.31521	116.00518	130.75758	153.18127	143.37213	91.82621	120.75943	114.10181	136.53861	118.88238	139.43200	95.41991	132.69045	111.97875	126.29235	148.41242	99.04102	122.17236	136.93877	120.44787	105.38081
X603142095F1	4653.014	6715.450	7613.774	4804.036	9469.620	6816.169	6701.120	4045.513	9155.670	4495.496	5841.815	7783.766	3615.116	5325.438	8364.518	7308.907	3364.611	7693.900	8020.161	9017.682	8794.970	8603.221	8357.856	6288.014	7758.417	7820.272	6973.733	8212.248	7818.414	7467.442	6940.057	8056.669	3231.525	3021.881	8872.851	7371.241	10742.973	8677.938	9206.890
X603142096F1	3944.978	3242.702	4587.142	4392.766	4589.541	4834.418	3691.686	4350.295	4832.617	4080.711	4313.899	3749.140	5190.348	4667.542	4684.563	4023.594	4609.077	3881.482	3210.424	3742.710	3249.799	3547.277	4426.256	3643.216	3134.703	3926.717	3481.912	4336.023	3337.049	4022.849	4055.793	4062.330	4729.492	3909.235	5385.355	4068.922	3223.216	4272.393	3942.445
X603142101F1	304.49796	76.20531	80.91328	142.05104	89.45283	81.16051	87.53155	67.47769	68.19701	235.90779	76.27863	92.91606	91.64576	218.67319	78.06993	68.80363	207.23912	98.92055	73.86676	85.12592	67.72664	76.11260	90.22698	69.68878	65.77662	122.71710	68.63885	96.99342	67.59185	94.05711	87.30780	62.90833	164.42797	404.80596	73.41160	78.96207	68.87511	84.42049	82.63087
X603142102F1	79.384995	16.897519	18.616748	55.949345	24.224034	8.266992	18.927613	102.923902	17.335840	74.608223	17.424436	21.877724	53.862611	67.802120	20.145949	19.186968	62.401167	19.687882	35.345431	18.322579	NA	13.088953	16.812874	21.850449	29.273821	19.715544	19.675115	18.581306	13.083730	15.953902	17.495912	13.237708	48.302457	37.477048	22.313932	14.565000	11.009372	11.771430	18.820108
X603142104F1	3872.222	3040.923	4113.605	3527.015	2902.910	2934.639	3383.056	3305.155	4203.407	4093.582	2816.784	3167.843	3639.229	3070.748	3175.576	2862.902	3682.866	2828.948	2736.866	3166.879	3361.854	3647.150	4003.984	3439.460	3323.845	3668.542	3310.492	3329.153	2991.088	2816.586	2762.559	2655.326	3871.386	3877.373	2274.415	3424.655	3434.308	2494.260	2699.028
X603142105F1	3037.178	3690.216	4244.234	3499.279	3695.150	3807.579	3560.258	2805.467	4590.855	2907.727	3276.043	3592.495	3283.646	1818.225	3744.951	3534.852	3198.590	4147.778	4043.851	4067.194	3657.079	4584.991	4123.360	3597.229	3989.789	4131.640	4155.323	3620.454	4005.660	4206.612	3454.335	3520.222	2784.570	3402.790	3532.122	4731.381	4528.295	4272.205	3429.348
X603142106F1	967.9423	1236.7578	1710.1622	1098.9850	1019.3802	1490.2388	978.6534	1185.1008	1062.7338	884.2851	1471.7431	1157.7216	1570.5441	1036.5667	1066.0114	1500.2638	1275.8919	1169.6212	1091.2294	1260.8797	1186.7922	1090.8332	1285.7990	1051.2034	1367.5626	1332.1105	1131.7246	1174.1600	1193.4518	901.1510	1454.9228	1197.2014	1318.9187	930.0282	1052.7208	1195.0086	976.5170	808.4575	942.9183
X603142107F1	3662.438	3549.506	3791.216	4505.200	1732.440	2998.689	3727.159	4522.123	1084.064	4755.161	3516.817	1721.744	4305.301	2369.736	1739.572	2511.008	4582.773	3252.573	1895.044	1638.325	2133.269	1068.715	2424.878	4136.175	1880.334	2369.380	2153.590	2085.225	1590.226	1487.259	2530.787	1100.989	5751.450	5138.863	1857.227	2027.937	1289.326	1581.457	1563.361
X603142110F1	2045.0280	1105.4132	1470.2272	1996.1221	1412.3836	1301.8017	1186.3768	2328.0903	608.6930	2320.2592	1276.5973	1550.2312	2796.1756	1623.4817	1120.2087	1416.4940	2642.4318	1573.2775	976.2106	1557.1813	834.2531	1135.9510	1158.8318	703.7681	1161.1602	1704.0204	1465.6977	1623.5865	908.0342	1132.5657	1107.7937	1045.3592	2411.1762	2246.6410	861.4772	916.8344	1453.6485	967.3208	1386.0704
X603142111F1	2982.1250	1071.7236	7578.1018	1310.6347	1494.9061	934.9873	7903.5008	2031.2902	10906.1812	2420.8880	21873.7967	8599.7150	973.2935	4190.3105	605.0217	794.7609	1423.2207	2177.3237	5850.0427	6492.7291	9202.2504	3134.3706	2619.9744	2421.0071	7111.1314	5602.6288	2027.4082	10637.7991	6318.6917	7446.1613	1100.7185	2580.3722	1103.0743	1694.6968	791.8054	1127.1575	9154.6632	1891.3521	6798.0101
X603142112F1	216.04995	1643.95357	122.22907	273.27570	146.62851	187.02175	630.20226	160.62620	85.93510	524.95609	265.50410	91.78070	233.08328	241.43644	138.94547	136.94453	310.53340	156.13449	230.26761	152.75261	1277.24612	57.36222	52.20047	430.68161	167.79320	22.15255	150.96380	89.75067	93.27488	238.42225	35.68170	83.60565	372.84884	624.80838	50.17636	71.41096	49.78045	85.88962	148.96778
X603142117F1	1557.369	2282.383	2365.758	2123.424	3040.034	2651.471	1719.484	1720.058	3077.177	1456.071	1928.927	1935.975	2811.353	2530.687	2150.131	2191.858	1230.703	1831.696	2031.708	2688.805	2147.987	2298.110	2577.663	1993.051	2228.383	2212.480	1991.974	2479.511	1889.069	2400.804	1994.905	2139.306	1588.497	1535.955	2928.152	2834.024	2436.194	2627.746	2950.010
X603142118F1	12425.208	19074.606	19053.212	11745.727	19016.221	18695.517	16215.706	11103.866	19509.823	12176.143	15690.563	17987.576	12962.087	16021.393	15469.341	17601.718	9174.189	17996.225	17142.916	19062.872	19744.653	21087.684	19243.639	17630.969	20801.022	19220.803	14929.009	19394.147	21226.888	16990.243	18113.374	18728.498	9490.478	9291.656	20608.237	20500.546	21569.214	19982.214	23837.477
X603142119F1	9.717086	8.280343	10.400103	9.475676	11.106832	9.362400	12.484223	17.719378	8.186922	10.278829	10.541294	9.049410	13.031109	14.497535	9.759193	8.098790	13.891838	8.276996	7.478336	8.050578	7.721088	9.674708	9.864179	9.738240	9.341726	7.445668	10.895566	8.766330	10.009267	8.914122	7.359269	9.074417	15.351730	14.168722	9.144145	9.307257	9.214662	9.660740	12.967690
X603142120F1	266.73001	86.13924	110.47590	102.67320	69.47671	97.75286	67.21629	101.79172	76.30777	213.99341	127.45763	90.27092	113.18743	193.13092	95.64285	80.12621	134.96889	58.30611	62.66790	70.04133	56.71032	99.38095	126.25032	120.00775	55.89807	84.52211	66.12126	96.60765	101.47350	71.15209	89.27741	106.42645	102.01691	155.40247	43.10425	77.73660	93.31797	96.14236	102.13835
X603142121F1	649.7799	686.9315	679.8837	459.0731	782.3416	776.2463	814.7951	822.7646	793.9808	732.1390	643.1914	633.0976	693.1115	933.4980	791.4498	616.1656	916.0653	678.7997	681.1031	776.9838	1386.8580	889.2261	530.3651	774.3843	1006.7512	492.1512	766.8976	945.0918	793.7998	748.0538	626.1094	807.4820	598.1236	586.5234	805.4625	760.6498	679.2344	741.1231	699.1705
X603142122F1	1929.7300	2003.5788	2630.6813	2043.9416	2579.9982	2311.2466	2086.0373	1875.0991	6107.1542	1458.2318	1757.1633	2497.8969	2433.6520	992.5188	2734.2911	2272.1145	1542.3327	2426.4760	2961.3294	2766.3631	5899.9588	2912.9004	3157.1939	2205.5527	2286.4416	4321.9924	2476.7875	2160.0187	2971.3418	2457.9564	2536.0783	2603.8779	1456.0121	1380.0707	2431.0295	2740.6628	2871.8721	2263.8486	2679.3834
X603142123F1	4687.049	6321.251	6996.698	4564.302	7744.509	7314.947	6051.664	3859.210	7137.278	4735.034	5662.008	6310.120	4902.642	6037.336	6343.382	6922.570	4535.649	6675.229	6842.688	8249.332	7492.699	5433.094	7296.311	6621.407	7368.443	7114.378	5966.400	6925.136	4922.142	4711.326	7164.301	4728.961	3162.624	3273.820	8071.442	6451.872	6456.153	5344.127	6823.565
X603142124F1	636.8467	267.9198	279.3573	353.7103	311.2044	284.0949	339.5282	237.8869	195.1486	603.6001	272.2588	279.5770	351.2841	427.9982	325.2375	284.8643	446.1149	310.5032	312.2165	300.1635	197.2293	273.1115	354.3810	355.8877	130.7767	187.4205	350.2979	365.7276	292.2290	292.7707	408.0548	348.6360	294.4879	623.5776	225.9987	340.4207	384.7142	390.1855	296.0928
X603142125F1	3147.373	2795.915	3354.839	2727.354	3843.024	3386.038	3714.325	2557.280	3833.889	3335.009	3521.511	3649.099	2655.270	3133.821	3575.947	3860.550	3310.722	3166.488	2821.755	3807.919	3262.409	3608.668	4414.429	2731.912	3014.139	2980.831	3137.310	3636.038	3856.881	3645.971	3203.832	3820.601	2584.258	2555.043	2701.154	4237.499	4410.592	3552.627	3450.410
X603142126F1	1305.3406	557.5846	802.0855	928.5348	715.8121	433.4491	365.7478	736.7112	9213.3980	858.2042	377.1273	685.1792	1077.3301	626.3272	995.0909	668.4541	910.6327	661.4079	2979.3735	1199.3234	12954.8521	447.5944	853.5059	456.3465	746.2156	726.0882	788.9471	558.3380	508.6242	2950.1553	398.7968	565.3567	699.7119	465.1508	817.3232	986.7320	568.7284	473.5890	698.2246
X603142127F1	33.40520	269.94118	349.91501	141.25116	161.34825	384.86551	136.82273	166.18209	395.53544	58.08631	340.06353	197.93868	130.62883	74.32761	190.38514	208.55879	57.51692	198.37656	145.01693	264.22933	238.03798	105.99003	183.59775	317.63280	497.07980	170.39756	118.78631	586.16467	119.97225	188.71270	235.84789	96.48149	42.60576	23.91809	224.08412	205.99492	97.87187	177.06237	310.28495
X603142128F1	21898.83	22250.53	21573.97	20850.21	19780.37	20606.46	18827.99	22366.86	17610.77	21419.13	19202.12	19361.22	25293.50	19259.85	17735.13	20594.89	21159.14	20266.07	20851.56	20027.25	19965.90	18799.07	19909.13	21913.23	20978.89	19992.57	20770.03	18595.05	17243.62	19580.95	20191.72	17050.31	23847.38	24344.04	18704.77	20685.32	17279.21	19080.42	17800.85
X603142131F1	6214.631	8169.913	8990.412	5648.048	7573.295	9989.327	7187.992	6415.453	7909.187	6102.118	8351.538	6953.629	8552.898	7512.895	7873.376	6135.441	6925.131	6476.981	6717.558	6884.579	7449.158	11169.419	9822.293	7793.357	6181.213	8422.233	6853.135	7837.985	7994.598	7621.028	6904.260	7720.857	6187.189	5287.669	6018.159	7528.983	5498.696	5517.470	7031.181
X603142133F1	84.90259	113.33629	132.63520	77.51186	187.18782	159.58228	124.31112	70.25552	182.36093	70.65708	126.38683	155.02957	43.60502	89.38950	171.20654	133.34328	62.75553	119.25992	159.39614	143.07906	416.83762	151.56103	164.57846	91.84211	130.85800	130.32209	123.91612	144.92003	143.75233	147.45551	105.43027	174.19427	46.55175	64.61138	111.93184	142.82074	190.14904	156.42554	153.68067
X603142134F1	277.1098	635.9965	966.9762	652.4781	807.2413	959.3359	559.9348	682.3706	661.6123	344.1706	626.4871	808.3067	812.0697	474.4533	809.4579	931.4922	388.5765	644.6321	773.8842	937.6001	753.3775	823.2034	1069.6458	631.9768	873.8347	852.6103	619.8500	718.8762	777.4074	609.7601	946.2517	994.6804	362.9065	191.7174	805.8959	893.2459	704.9332	673.5089	934.1136
X603142135F1	4845.121	4087.157	6011.997	5096.304	4478.047	5309.568	3211.066	6703.824	4657.754	5110.463	5519.148	4599.788	9708.371	6557.634	3352.708	4142.592	5361.267	3871.745	3780.701	4954.318	4684.263	4861.746	4839.861	3445.025	5757.456	4460.632	4011.199	5647.270	4587.092	4843.722	4154.133	4483.059	6785.393	4970.618	3320.434	4753.292	4437.610	3554.713	4616.806
X603142136F1	19524.67	16078.69	15929.68	18759.00	14000.42	15867.94	15485.93	18609.67	18426.68	19829.35	15872.09	15942.41	19028.97	17187.99	16273.84	13656.64	19968.39	15926.25	11308.64	12165.22	15648.24	15602.69	16580.54	15906.16	16113.96	15008.75	13716.60	14002.17	15157.95	15670.83	15230.33	15639.03	18525.29	17731.14	12522.67	15977.26	13937.41	14300.06	13744.00
X603142137F1	8729.165	7331.824	9971.454	8852.873	7359.432	6394.954	8586.043	11666.224	9880.924	11808.911	9539.935	9117.899	11642.801	7951.575	9723.489	8113.871	10006.473	7162.126	8985.383	8109.090	8233.639	12592.682	8845.127	6944.709	7425.860	10396.106	8181.318	10041.994	9443.943	5365.897	8196.056	7716.332	9978.905	8800.851	6929.718	8463.582	10699.843	7575.290	9520.878
X603142138F1	12959.004	12265.615	13123.257	10954.799	13638.846	15801.278	17072.228	11228.281	9932.700	13537.681	14838.305	13035.508	9249.579	13635.638	16671.721	14467.093	12457.468	13877.344	15538.858	11554.212	15907.808	16968.181	15905.115	17042.711	10177.219	15763.192	15696.991	15918.380	15175.589	12486.400	14115.640	10165.530	10980.895	11747.915	13307.780	12404.843	13393.514	14236.359	9809.353
X603142139F1	556.7062	1477.4569	1855.8105	835.4663	1155.4098	1657.8955	1443.9892	1040.1808	1341.8877	579.1732	1470.2522	1335.7851	1121.7254	124.7514	1529.2776	1337.8660	581.4354	1370.3366	1174.9656	1089.6114	1205.2098	1437.5800	1832.1600	1656.1245	1412.8312	1416.8805	1172.1934	1260.4643	1413.2136	1393.1211	1385.3611	1278.7027	723.9657	443.4342	1068.7795	1634.7202	1492.2863	1298.4863	1320.5528
X603142140F1	501.9286	1097.7536	1412.0709	848.0187	1303.3590	1107.3015	708.1407	846.7450	1458.4883	498.6980	1684.1976	1140.4699	1573.6214	299.1978	808.4630	1456.2932	531.8677	1080.3914	1024.4857	1685.3260	1156.6378	1366.8148	1528.6786	633.9687	992.1136	1341.7579	1020.1166	1181.9629	1350.1143	1217.6547	1320.0859	1006.9617	634.4186	410.2052	1124.9648	1381.5046	1454.5310	884.2636	1611.5098
X603142141F1	2997.889	4145.250	3509.915	2207.315	5098.643	4176.190	4367.693	2105.447	5211.288	2774.540	3840.248	4768.711	1881.597	2692.651	3705.323	5075.022	2233.400	4583.672	4577.764	5499.897	5035.952	4617.406	5090.251	3389.322	4932.032	3059.403	4543.168	3856.822	4382.264	5742.150	4426.310	5122.549	1964.563	2305.131	4605.205	6160.032	6817.866	5388.640	3930.567
X603142142F1	252.7671	635.6596	987.2985	627.6431	716.9915	916.7437	450.7019	586.9641	594.7026	379.8342	661.4768	643.8566	1263.5141	326.7792	512.3002	782.1738	535.8002	718.1014	697.2175	755.7483	486.4029	651.3336	735.6991	535.8919	608.2156	803.1109	548.9357	467.5597	390.9802	405.7398	793.6772	820.0105	417.5031	170.9394	729.4879	663.3317	658.4074	574.9340	756.7105
X603142143F1	283.4131	258.0363	349.1918	356.1031	545.0271	303.2232	421.1454	264.2177	364.1785	252.8227	239.5097	308.6992	553.3674	898.9442	316.9030	392.3582	245.5582	305.6086	283.7078	492.6765	392.0966	401.7118	305.9561	268.7814	326.7076	339.8893	358.3265	343.4420	329.7785	276.5297	327.4411	316.6904	208.4738	338.9664	409.5143	333.3258	336.0084	279.3129	355.1955
X603142144F1	5527.703	4773.443	6156.884	5873.114	4931.582	4004.436	4400.710	6206.095	6283.016	4890.671	4053.894	4521.954	5511.382	3433.749	5558.699	4884.484	6462.411	5225.926	5130.852	4881.104	4363.399	6696.920	5414.925	4573.721	6060.843	5918.979	4562.764	4994.361	5967.063	4799.453	4820.296	5718.214	5672.020	4471.697	4204.654	4561.484	4739.831	4891.938	6061.075
X603142145F1	2209.693	2959.215	3090.103	1711.205	4752.901	4013.869	4214.340	1542.372	3144.665	1514.777	3120.579	3349.086	1202.424	2166.929	3150.592	4353.373	1174.885	3082.170	3171.890	3834.504	3739.505	2929.822	4879.365	3502.276	3163.184	2895.670	2723.991	3675.546	2958.895	2932.135	3867.467	2215.753	1680.366	1258.822	4451.139	3843.926	3078.745	3494.997	3219.315
X603142146F1	4422.495	4608.889	6148.688	4588.458	4794.280	3632.395	5054.598	5855.003	5614.050	5001.419	7612.017	5281.895	5378.798	3856.146	5039.274	4778.138	5198.768	4086.628	5723.599	4343.640	5044.680	7003.171	5246.232	4457.936	6024.374	5111.062	5236.910	6171.612	3714.286	5636.666	5026.502	6751.667	6231.311	4044.287	3769.744	3034.870	3559.961	4475.333	5726.439
X603142147F1	25033.74	28823.07	29655.48	20267.87	24223.57	26697.04	25356.78	26072.83	22061.40	33095.55	23481.48	25050.20	21298.90	22080.68	28795.75	23132.01	23688.91	26939.82	23708.56	24342.16	22833.52	24490.47	27706.54	31433.99	23444.36	24743.88	24020.56	23424.78	24278.38	24332.48	24688.82	25076.67	18716.78	21481.58	22971.82	23800.41	24661.70	27420.94	27881.53
X603142148F1	9642.526	9000.206	9866.317	8673.557	9005.762	8683.873	9005.721	10036.652	8613.263	8263.278	8164.510	10351.540	10524.779	8722.388	9150.505	8371.657	9107.468	10100.740	9569.342	9975.349	8946.682	9576.312	9678.182	9001.731	9200.819	9420.601	8855.121	8978.079	10812.291	10188.844	8966.445	9518.360	9823.719	9813.597	9308.884	9856.823	9558.968	9064.536	8136.351
X603142149F1	4800.195	3620.241	5228.533	6499.830	4779.043	2996.487	2895.518	4615.605	4026.002	3613.198	3416.230	3061.664	8876.493	3951.015	4649.111	3863.996	3919.915	3846.435	3470.949	3724.903	7325.136	4595.512	3279.955	1869.008	3312.342	3500.456	3172.709	3342.434	3664.661	5225.872	2933.486	4487.194	4745.887	4598.584	4377.389	4108.232	4217.795	4934.785	4507.379
X603142150F1	19205.63	21138.01	21390.97	20344.04	22508.64	20087.58	18499.02	19312.09	23118.96	20926.54	19022.09	21273.91	23633.18	21184.88	21066.65	19781.52	17319.94	20693.52	20784.37	22161.64	20887.02	24256.31	19904.08	19669.85	23324.92	21699.21	18809.12	22046.45	22757.66	21274.87	19288.60	25257.78	19264.10	18181.96	24627.42	22469.71	23924.28	23107.87	24691.79
X603142151F1	1724.7848	3448.0302	3874.8313	1658.6080	6185.7552	3766.5730	3364.0611	1720.5910	5134.5999	1487.4812	3722.8456	4960.0663	1181.3398	1420.9091	3976.2326	5165.1153	830.6593	3809.4307	5158.1549	5776.8035	5660.4867	5475.5988	5198.4021	3365.0730	4354.3482	3456.3161	4830.4537	4863.7082	4582.9031	4210.4862	4811.8862	4688.2100	772.7753	877.8191	4210.0007	5629.5941	6342.4445	5627.2545	4901.4560
X603142152F1	61.15092	61.81318	81.33613	74.77159	105.35749	69.29031	89.91048	68.04839	134.97794	89.98219	62.45840	79.04189	61.66919	57.24823	128.05114	83.24136	67.02591	52.64985	61.77501	68.37181	69.37391	84.37478	57.54017	55.28853	59.52211	62.86319	67.24993	79.09890	61.35542	81.92517	49.26847	93.47800	143.73016	80.38128	79.06761	88.09902	89.63682	115.49064	110.92849
X603142153F1	70.81816	87.31948	132.72466	84.99313	53.59728	93.78258	133.40093	126.57296	82.40910	35.30142	38.42352	50.96442	46.61353	42.53792	36.89525	49.32781	44.15738	47.96619	40.48443	38.06010	43.93374	44.78807	84.59861	86.56081	60.71024	47.30092	34.35658	129.80942	208.87891	NA	64.04321	48.71637	26.85338	51.39254	95.56217	45.96016	35.84788	38.66278	46.74598
X603142154F1	11567.241	10493.346	10095.432	11946.939	16037.429	10151.583	10571.690	8740.437	8088.271	12884.423	18621.926	10102.310	9093.270	13837.982	12251.058	11527.582	9414.001	9808.111	10093.458	12181.292	12320.569	8337.439	10369.492	7527.585	13008.372	8079.969	9205.948	12253.419	9321.041	10656.444	9949.939	9184.723	8420.577	7457.023	13870.334	10959.977	9869.563	12654.656	11315.800
X603142155F1	700.7137	669.8443	773.5162	511.1947	813.1420	774.4327	759.1352	526.1358	935.7640	672.6259	464.8500	759.4354	463.2637	856.3715	817.8469	802.8784	676.6055	716.4874	830.5004	791.1850	1713.1495	789.4933	1051.6175	633.8719	664.0093	876.2535	796.5796	743.0641	750.1664	872.4516	683.6667	604.8485	528.4917	846.1899	609.6644	876.3006	932.3411	661.2429	692.8659
X603142156F1	168.7337	277.6549	361.9855	172.2450	964.3501	421.6104	579.7528	162.5667	760.8753	122.2333	1385.7171	530.4898	189.7022	252.3341	373.0299	417.8402	118.8615	383.5853	614.4076	483.0891	NA	502.7077	530.4214	298.3400	298.9761	438.6192	507.0126	346.7578	748.9013	673.9449	410.2033	482.4666	186.3711	163.0336	341.9199	435.4069	608.7942	400.8950	422.1839
X603142157F1	6569.999	6690.763	7603.115	8175.463	6168.815	5864.245	5090.535	7765.379	7214.274	5903.009	8169.653	5913.987	9260.273	5970.076	7142.394	5893.265	6446.315	5956.517	5813.514	5558.669	6224.224	6303.983	5872.275	5952.448	5994.424	6088.796	5389.035	6120.080	6067.114	6472.582	5615.509	6355.247	9092.625	7949.324	6494.222	6273.622	5772.720	7785.154	6355.736
X603142160F1	26.29824	139.14369	42.57777	33.90018	52.89325	64.39262	29.55870	25.46626	119.45589	14.33748	52.98444	56.76349	23.85310	14.59005	40.87094	55.71850	16.09016	64.56312	71.46487	90.22333	163.80210	60.97860	147.06414	84.42863	120.70830	92.67700	35.46425	37.13611	59.76372	111.94408	67.85612	163.62489	11.47807	16.50004	62.25584	37.49929	34.63657	61.23013	60.53367
X603142161F1	1335.939	1585.181	1487.290	1454.881	1850.484	1679.273	1151.587	1485.585	2095.175	1042.525	1300.820	2068.634	1632.828	1360.384	1545.705	1695.073	970.798	1646.599	1952.696	1815.788	1321.012	2137.349	2130.008	2139.553	1572.453	1674.556	1865.410	1452.793	1489.860	1854.310	1689.511	1534.093	1400.602	1577.395	1534.952	2253.417	2246.445	1839.867	1908.948
X603142162F1	4422.095	4644.409	3849.849	4750.058	3558.765	3624.890	4115.731	4960.779	6128.591	4438.670	5763.632	4065.341	4884.502	4113.662	4021.911	3904.029	4358.041	4352.352	4207.630	2807.749	4782.963	3675.629	3390.439	3827.821	3255.517	4307.775	4232.853	4719.647	3813.449	4928.088	3805.910	4198.140	5792.392	5878.342	4018.778	3921.461	4368.852	5184.352	3745.451
X603142163F1	1425.5022	1575.0895	1834.5554	2255.8635	1179.3515	1687.6942	1452.5272	1899.4297	708.9889	2334.4497	1869.6648	1278.6847	1830.1728	688.5689	1137.7038	1398.8961	2436.7061	1667.6930	1070.1782	1087.0962	1061.9529	834.6833	1545.4089	1531.6679	1229.3461	1326.1982	1169.9365	1269.6208	716.8108	990.4308	1257.9630	753.6576	2409.3102	2521.1409	1169.3535	1252.3727	1064.8588	1033.9704	1194.8843
X603142164F1	12415.59	14983.91	17008.08	14451.37	12507.87	15285.30	15331.08	15789.18	12649.90	13488.38	19048.66	11196.68	16650.88	16153.86	13270.68	14644.67	13483.73	15480.72	13772.70	12676.11	17294.82	12648.11	13649.49	15874.96	14875.25	18228.07	15141.22	15014.20	10067.46	10711.70	14378.33	9974.86	13441.88	13125.90	15061.55	12099.18	12681.70	12552.51	13540.24
X603142165F1	22.66346	14.63622	13.91486	22.43201	13.42905	16.23485	12.38975	20.55558	14.81314	17.32844	11.49921	14.16038	16.59625	30.60757	13.91491	14.93218	17.90055	23.61827	16.48493	12.56781	15.86437	13.85761	15.02745	12.94229	16.45572	22.55521	14.39093	16.65366	12.85978	16.09039	19.58427	21.09310	23.13535	21.57581	18.02452	15.52188	19.56452	15.60480	16.53658
X603142166F1	101.26523	922.48834	358.18649	244.36328	100.09994	356.35903	414.06057	278.67338	425.40651	326.78293	303.22107	405.07757	453.02729	313.25067	66.76401	392.19804	163.12398	651.81119	82.42538	408.48252	59.47442	476.06006	419.32182	969.21658	45.69817	329.80118	413.42935	911.86517	103.68540	416.89920	605.83516	712.00523	639.75797	61.55443	397.64517	252.63702	169.35609	37.48099	61.32560
X603142167F1	1435.2994	1022.5229	1272.7176	960.7039	1018.0855	888.5573	706.7561	919.7285	1075.8357	1478.2362	1213.7479	1125.1329	1129.4121	882.7950	839.2747	872.0883	1351.0212	755.5027	656.6256	1146.2408	994.8411	961.0845	1297.3558	769.2494	1058.6829	1045.6404	784.8823	1038.6418	869.6481	892.9320	923.8960	947.3523	1683.4412	1467.0530	759.7448	856.0345	863.1575	969.8819	935.2877
X603142168F1	3181.116	4601.833	3829.167	2060.827	5775.696	4524.644	4735.398	2163.898	6436.787	3730.231	3218.130	5186.607	1562.885	2148.061	6274.456	5594.941	2643.406	4218.310	5816.378	6960.341	5700.195	5778.785	6604.580	3526.224	5168.433	3722.977	4841.208	4807.864	6494.929	6741.922	4967.650	6157.429	1334.206	1313.838	4900.272	5891.212	7533.940	6612.608	4956.902
X603142170F1	13.77895	56.50552	39.63685	24.98952	19.67867	43.64061	23.37569	19.96344	20.66906	13.21287	27.50860	28.48864	16.00369	12.25220	30.27410	50.35224	14.61936	82.11568	81.92078	21.41866	20.78470	21.44796	25.02880	28.11077	30.93686	51.69425	42.87875	22.21642	34.85683	29.05525	41.47971	26.75683	17.46670	11.88416	46.21800	13.83610	18.80574	21.08827	21.00055
X603142172F1	4239.390	4222.803	5416.187	3437.878	3535.526	3854.716	4310.825	4913.499	3780.494	5038.800	4536.615	5667.055	4737.050	2700.342	4399.241	3881.453	4490.044	3724.057	4541.838	3841.067	4126.805	6507.210	4616.311	4114.644	4590.227	5602.093	3849.955	3579.161	4267.565	3543.613	3947.008	5380.595	4656.603	3868.892	3627.699	4180.538	5498.867	3823.031	4618.535
X603142173F1	17649.65	25605.43	25581.74	17250.26	25110.08	26254.17	25788.86	14479.34	24973.02	16703.03	34092.76	22497.80	15048.52	18319.39	23592.94	24222.76	16420.54	24498.13	24056.02	23753.48	24482.01	28186.20	24186.41	23220.42	24836.95	21953.71	21115.33	22834.02	26630.44	24176.95	22397.08	27406.93	12379.79	14506.85	25165.80	24958.09	28887.47	27348.17	25637.54
X603142176F1	41.60828	105.41111	65.94121	52.58910	84.61952	74.96047	69.52503	65.63360	162.82498	36.55702	67.62100	101.16133	54.88476	74.56409	87.99175	66.42847	42.73204	80.08307	73.41003	130.38943	105.09292	109.57514	106.09669	67.26369	172.41640	96.19565	88.16669	167.15787	119.94613	87.84136	74.86766	92.04052	42.19679	45.83502	74.79989	96.58184	172.91719	108.51114	122.82971
X603142177F1	113.5055	269.8882	600.0474	213.1332	241.7119	256.8274	446.6733	207.1835	328.6400	112.9058	201.5553	272.3129	219.6324	180.7378	224.6751	305.8394	126.1369	261.2450	359.8444	587.1313	1192.4962	389.1178	327.5325	243.6959	462.5288	289.3131	258.9802	701.1502	342.7120	465.3043	218.7596	267.4453	192.3284	126.5310	208.5443	209.1413	466.4261	215.6331	346.3945
X603142178F1	12461.676	17739.626	19554.534	12728.598	21163.004	18445.496	15862.093	11747.259	19798.829	11999.245	15769.641	16487.591	14881.454	17457.468	17415.391	18065.769	9218.780	18049.546	19324.899	20584.645	20307.308	18760.377	18318.831	16997.425	20222.252	20676.747	17467.844	19012.191	18502.783	17741.174	18993.109	19258.255	8911.052	9004.681	23132.263	19359.551	18943.626	16617.138	23349.797
X603142179F1	5086.8763	7253.3894	6667.5920	5573.0329	4304.5544	6032.4035	5776.3133	5286.3526	3311.1040	5471.6402	5969.3759	4901.8322	5401.3989	650.8852	4058.4322	5382.6601	5300.3757	6959.1526	4055.9684	4048.2416	4526.8957	3648.8311	5094.4830	6714.5896	4901.4609	5179.2827	5148.4044	4691.0594	3872.2560	4479.4156	5302.0723	3723.5950	5615.8670	6713.1645	4303.8626	5222.5928	4265.9586	3943.3285	3714.6805
X603142180F1	100.18174	625.33847	845.66935	595.98822	443.86025	281.38098	608.12439	251.57796	283.34079	180.41823	875.18093	444.09039	134.43311	63.97229	317.24482	582.69143	377.96768	734.31649	256.26249	339.60379	361.60929	219.31561	676.78561	828.57094	402.19277	723.99444	583.69642	500.00908	232.39159	230.99613	601.32880	182.07266	111.99709	107.71262	430.82821	229.02127	196.77913	251.78179	293.04733
X603142181F1	4674.656	5109.457	5543.933	4603.139	4210.933	5215.149	4666.048	5534.481	5400.517	4513.658	4647.208	4395.684	6102.667	3991.115	4528.920	3987.599	5236.047	4870.676	4454.790	4702.903	4166.200	4989.309	4583.009	5133.171	4785.131	4756.503	4665.388	4088.589	5693.848	4930.790	3932.327	4593.854	5336.461	4556.861	4328.173	5287.635	5618.432	4485.333	4851.196
X603142182F1	1648.5824	726.4310	515.9015	1226.0865	922.8946	798.0853	580.0998	1755.9952	684.7458	1586.8831	926.9456	1265.0423	2839.6141	662.7505	983.3242	1404.6312	2039.3221	806.5488	1003.1785	831.3574	665.8127	1439.7050	685.2021	600.7530	1147.3841	1338.3722	796.8402	836.9364	783.8188	536.9212	782.6307	1142.3009	1065.3774	1211.9096	1138.7808	674.4753	636.3879	720.6104	1075.6554
X603142183F1	22.04997	122.09926	91.36080	26.20275	215.07213	71.94433	63.94190	22.57397	175.42902	16.60779	60.56356	51.24073	15.80211	15.02282	183.00124	89.67922	20.13006	107.60928	73.73923	49.33402	80.41946	52.90695	72.18884	46.11163	41.00575	97.21127	106.52033	45.82783	82.31419	259.57876	87.12092	94.28666	15.15274	16.43835	279.47975	55.29560	78.95631	147.56473	76.68423
X603142184F1	17.12539	27.42026	22.19631	23.73969	31.72695	25.67851	35.92168	17.03391	16.21091	34.17006	28.52142	24.41720	16.99450	14.92757	25.18308	39.16758	28.33049	25.69088	14.51766	22.63632	20.03177	17.37013	24.75273	26.83032	21.38427	17.06848	14.78968	20.51546	15.07711	28.32417	58.78817	18.25504	22.31333	23.91958	14.17699	15.24858	16.17567	16.95765	21.11976
X603142185F1	161.85483	310.92079	489.24640	267.52072	288.65818	566.28275	246.87857	205.46623	207.27536	308.28326	518.70101	285.38886	193.96223	125.91609	256.90491	282.41934	380.36451	316.98468	175.76126	360.31727	258.39742	153.21026	258.15133	422.05052	403.11208	233.12357	236.97256	380.55821	178.36762	207.12041	299.42053	150.52267	180.44170	74.15183	263.97262	250.26079	225.34275	235.36619	327.29603
X603142186F1	26921.52	28241.27	23940.51	24467.12	29637.30	24855.68	28965.89	26625.26	20391.92	24935.49	24365.85	30521.20	21032.74	23532.99	31332.08	30824.09	25786.65	28234.92	31048.96	31394.27	29528.67	27314.63	30025.58	25689.42	27772.88	26419.74	28529.71	25168.63	32276.68	29695.01	31282.19	30714.66	28328.40	25632.49	29043.51	31913.98	25136.20	25395.67	23928.94
X603142187F1	95.70813	279.64383	365.96636	163.97145	218.59228	280.96493	141.24692	279.29463	514.94389	100.07066	350.96777	286.47330	430.56378	116.59456	225.53653	354.38826	199.28403	182.19073	207.30189	299.96856	324.14187	264.25367	305.98374	132.02501	382.57550	326.83579	209.50105	256.89042	220.94440	478.23295	276.88493	248.76976	95.68191	41.19906	222.09867	243.03984	236.23027	218.39249	335.15394
X603142188F1	340.7785	669.0598	1094.8593	807.4515	745.9726	616.7472	522.1763	930.0265	669.4774	416.8041	618.4411	779.9646	1177.9827	229.6093	651.3442	651.5268	432.3707	621.8239	686.3548	830.8045	620.9538	1027.5233	700.6247	436.2404	890.0851	766.2357	696.9469	794.5123	859.5744	809.3573	684.7092	976.5012	903.2012	330.7653	720.0151	795.8219	942.8061	963.1280	959.7823
X603142189F1	234.1898	532.4138	642.2392	574.7712	697.3454	656.8326	357.8879	512.4369	603.3268	370.6759	1057.0797	677.9539	763.3685	753.8022	521.1946	712.9588	402.1803	460.7347	608.3484	762.5860	580.0001	451.5406	733.4477	456.6210	719.7647	640.7292	501.8539	900.8492	465.1343	556.6489	665.6032	609.6383	442.9315	312.5338	565.9055	669.7777	537.8676	560.5676	554.2552
X603142190F1	27.24414	32.24267	47.49642	20.82312	57.70668	46.31362	27.78915	24.53402	34.36178	27.74636	54.81169	39.59120	18.37649	13.85598	39.39047	38.86598	19.39821	27.63082	34.51484	31.12720	71.87380	55.73814	45.85006	30.25348	39.28371	51.80394	32.65634	39.07390	45.43992	42.31153	23.90813	34.52353	16.81489	11.23621	19.09652	39.76277	67.89566	51.49995	37.88660
X603142191F1	11814.393	17410.083	17555.320	11727.318	16600.307	16024.681	16464.694	10403.771	17510.982	13993.939	15628.714	17732.368	9982.248	12541.327	18703.791	16720.572	13523.444	16637.465	16812.310	15917.752	17752.927	20339.715	17159.410	15640.018	14842.431	16677.846	16802.497	14246.983	17801.185	12647.398	16829.101	18213.628	8114.305	11640.723	14532.564	16991.419	20875.577	16529.955	16578.916
X603142192F1	5568.216	7437.627	8235.026	6107.851	7615.096	7222.450	4899.747	6226.157	9155.727	4818.402	6818.344	7437.926	6804.628	4732.661	7155.374	7168.226	5288.250	7138.802	7016.873	7437.685	7926.284	8175.517	8386.220	6277.299	7824.641	8265.050	5724.736	7542.605	6157.511	7494.072	7413.312	7569.321	5673.120	5730.494	7238.359	7544.171	8215.156	7072.817	8833.665
X603142193F1	9599.999	7921.534	4788.346	9787.657	7086.490	8779.469	7702.547	8325.933	4364.195	11590.281	7399.687	6066.772	10614.838	10011.980	7849.210	7255.325	11994.293	7049.679	5901.868	5081.779	5525.544	4940.161	8114.680	9252.243	4244.509	5058.426	6589.282	4827.396	6020.484	6950.451	7209.509	6432.957	10452.815	10054.011	6099.806	6463.577	4552.842	5570.594	4432.643
X603142196F1	18875.58	18187.87	20221.06	18907.68	15973.73	19605.74	17966.10	22032.89	15144.25	21160.03	14549.76	19016.73	21275.85	14726.33	16388.09	20145.58	21974.00	18874.93	20480.67	17676.95	15339.20	17208.45	19945.06	18834.86	16044.15	18551.79	17772.96	15488.66	16562.73	14206.40	18765.90	17984.13	22608.24	20193.03	16675.62	17997.08	23640.14	14579.20	18296.16
X603142201F1	1576.121	2249.330	3131.524	1972.344	2075.895	2522.056	1926.972	1929.936	2909.881	1546.302	2676.199	1811.087	2425.641	2017.743	2080.072	1993.414	1960.254	1767.551	2005.674	2443.081	1850.281	2501.496	3078.253	2227.225	3194.238	3035.477	1796.005	2221.429	1948.729	1906.169	1964.620	2314.512	1707.276	1461.885	1152.253	1944.105	1736.089	1790.720	2524.515
X603142202F1	37218.45	35865.16	31560.23	38353.06	40140.10	40537.04	39169.68	37005.70	37126.69	38643.20	36573.99	40249.20	36290.32	38166.45	43249.98	40249.20	35692.30	36229.58	37817.23	37052.21	40106.90	39843.70	39983.09	38209.73	37905.77	34694.98	38799.09	37723.73	42371.41	42851.82	38894.98	40989.73	36099.99	36737.32	39633.85	40358.62	34328.31	36173.47	35746.31
X603142203F1	102.55996	216.00024	218.26898	292.09917	243.22974	173.51457	130.24507	274.51090	NA	40.91814	203.01827	241.81977	559.15308	126.04957	169.65634	192.66818	111.17439	270.51926	206.74358	169.68159	849.18161	206.17403	241.94120	104.49556	372.39120	631.48514	195.79184	204.76409	167.00234	875.27169	156.28797	271.89655	270.79697	43.30088	487.14072	216.91996	241.87712	356.43743	388.56340
X603142204F1	1139.8527	977.6900	901.7438	1098.9573	732.6300	1064.6884	618.0183	1334.6574	3566.0899	640.1246	504.8759	673.5448	2526.1202	1763.6421	556.8196	736.5658	1204.4826	482.6683	1026.1425	1235.1801	1765.7803	808.9376	1051.8952	801.8175	1292.8538	1223.9561	621.0563	1041.2205	552.7804	3033.9293	574.8538	846.9821	1094.1026	1267.1550	640.4521	521.6568	886.8942	835.8958	1196.2552
X603142205F1	6783.485	6596.823	7205.792	6728.790	7313.609	6853.266	6368.554	5401.056	11325.498	5892.210	8448.163	6649.211	5255.582	6724.119	8253.009	7257.302	5682.476	6732.086	9948.783	9470.056	8822.472	8721.042	9766.293	7193.150	6816.854	7692.750	7555.426	8430.905	7873.218	6626.430	6956.145	6211.503	5204.764	5378.596	8492.986	6713.281	8399.872	6821.456	9268.771
X603142206F1	872.31268	225.78254	192.89691	481.64879	128.98398	244.33457	459.10991	385.63402	49.63701	1052.48951	329.16607	187.32424	247.84082	448.41235	199.12455	187.86235	825.11882	209.13301	139.09283	96.30172	154.28600	124.68360	155.61942	395.07244	90.99525	90.98265	202.96985	120.10386	143.97592	160.31267	206.01118	102.42148	578.11271	1067.70504	127.40685	145.75710	110.85160	109.18291	122.62843
X603142207F1	16.04319	15.29544	42.39358	12.75798	20.57313	21.43954	18.75698	14.80832	12.39138	18.72485	NA	18.43852	10.48563	26.80903	26.30044	19.82050	16.43801	15.56205	19.00641	19.83281	12.09911	22.98827	14.78580	16.27911	13.75470	14.82324	15.46929	18.49861	16.25885	22.32106	20.76688	19.23126	16.19062	33.29930	13.16775	18.46444	22.54770	17.31646	16.67180
X603142208F1	54.61655	159.56918	169.65638	66.56926	106.00730	154.76633	134.43769	113.99106	236.55848	41.04105	141.76814	100.03857	68.91584	53.63103	140.12399	173.28519	103.11471	202.02933	242.97734	91.85879	204.83061	125.54000	115.01974	104.93241	130.55923	235.58874	231.57215	127.09544	132.64554	159.06581	237.18433	144.79009	89.92574	42.24028	198.90361	164.43284	163.96518	188.55095	105.16250
X603142209F1	99.88967	366.33899	611.92351	120.80500	175.63951	470.24054	688.11225	102.22187	158.27931	94.87146	651.12426	260.67894	48.61601	21.92724	263.27693	378.57146	69.40212	452.43430	201.40471	136.62864	219.54128	141.78318	418.01975	669.37162	254.12483	323.44532	329.12398	272.32397	139.76672	163.12269	398.77708	117.08642	15.41997	50.79539	167.37594	318.93328	196.86822	162.47308	166.79395
X603142210F1	4071.604	5240.135	6684.350	4425.113	4053.412	5130.398	5303.855	5992.341	3773.638	5319.937	5750.239	6195.803	6542.417	3115.108	5029.783	4854.775	7842.466	5515.248	4806.963	3656.012	5019.929	4529.607	6209.582	5138.923	4070.321	5968.076	4988.921	4075.168	4127.974	2736.192	4873.985	4072.568	5376.255	5040.103	4059.650	5007.207	4538.397	4051.158	5028.338
X603142211F1	70.48018	31.99277	44.82097	44.38339	41.39936	49.57092	39.35344	25.09856	49.83929	49.63590	37.35350	46.08507	24.74456	34.75646	52.83130	54.84083	47.64962	46.58990	57.11341	46.14523	33.57727	60.26418	37.83863	37.91995	43.91581	47.55171	49.19518	48.52979	59.62475	45.43750	43.43423	65.91358	28.91908	38.36724	42.13784	58.31314	79.26986	70.54351	62.94537
X603142212F1	1424.07167	56.41200	62.03812	397.53813	68.67578	60.29043	58.63761	262.82593	65.49623	647.36414	42.72313	61.91952	580.79349	1463.00524	53.96273	44.75286	485.63467	46.89651	80.98349	61.25926	57.42220	49.30724	63.99296	47.04036	56.73586	40.91463	44.02046	75.74117	57.45138	50.89911	44.21550	57.82159	998.93726	1392.87572	52.45646	59.57344	82.73439	69.33403	71.62784
X603142214F1	1168.121	1497.259	1921.047	1559.955	1261.080	1875.096	1101.204	1686.457	1359.947	1012.081	1621.172	1230.487	2074.697	1570.555	1536.083	1442.203	1238.133	1385.693	1471.114	1771.022	1734.381	1340.219	1547.136	1435.115	2043.249	1795.649	1112.520	1421.113	1193.282	1000.427	1623.658	1600.755	1458.769	1146.034	1433.144	1339.295	1024.428	1140.294	1607.240
X603142215F1	1938.829	4168.365	5220.062	2089.827	4670.899	4551.158	4474.902	2210.843	5258.215	1658.597	4361.519	4482.146	2067.468	2149.180	4723.380	4937.046	1611.615	4576.165	3646.580	4625.161	4961.952	4891.441	5385.133	4188.057	4268.915	4307.044	3759.818	4347.824	3918.646	3950.367	4543.263	3911.470	1412.698	1058.970	4031.840	4584.402	4815.944	4425.599	5247.220
X603142216F1	98.19645	55.71034	72.06098	42.63873	25.04235	51.71878	43.98825	106.59237	23.24474	95.53646	72.39706	39.21524	35.88222	123.67585	44.22771	52.18540	139.57524	47.03610	43.77699	32.00929	38.13643	52.79262	38.15580	56.24858	37.64556	23.26991	31.65025	33.21514	27.86461	35.22257	42.03213	24.66312	137.93594	119.39074	24.03962	38.19545	19.47338	102.81781	30.50802
X603142217F1	4129.788	5188.065	6043.494	3958.072	6166.424	4799.345	4361.565	3582.465	5298.762	3970.275	3515.048	4771.614	3931.046	3726.203	4725.156	5566.075	3403.376	5254.963	5214.928	5657.241	4633.210	4492.417	5041.894	4879.045	4665.725	4832.959	5446.944	4135.670	5602.622	6786.911	4986.920	5427.996	3776.943	4833.182	6574.567	6976.964	6118.946	5134.845	5218.964
X603142218F1	121.02705	35.42209	65.36173	106.55982	98.23002	55.57382	37.45420	122.05197	31.44284	105.13618	55.72613	41.91391	113.23826	139.93815	75.30270	44.64562	91.11788	33.50710	74.27262	70.49964	55.22102	77.71392	40.42085	62.12219	68.29959	26.13757	57.68985	63.03965	56.85496	44.44733	28.62816	49.25479	151.83957	253.51119	61.82196	57.43734	38.03899	54.91171	57.05584
X603142219F1	11.837943	37.460976	25.955122	11.414374	14.296770	42.469272	48.482004	12.595724	21.425740	11.529338	38.092853	33.616219	9.775183	12.607322	20.800105	26.200785	11.423815	48.144486	17.217515	15.276316	29.372562	16.257674	30.121978	75.876611	24.261137	29.593021	20.184454	23.029318	17.403627	17.787439	46.037762	11.541752	12.422865	9.552861	20.967286	22.550329	13.032102	12.940856	14.104292
X603142220F1	5877.360	5349.026	2617.486	5820.865	2165.485	3947.544	9080.319	5751.188	1609.691	6431.039	5801.782	2919.762	7339.223	8625.957	2641.528	2477.521	6455.522	2730.496	1610.402	2312.607	2358.409	2100.324	4423.761	7144.461	1489.209	2086.938	3236.796	2434.629	3065.551	2852.419	2826.389	1668.441	7330.188	10489.835	2148.485	2605.378	2590.603	2129.267	2321.244
X603142221F1	179.0349	337.1464	455.0529	167.4960	452.6465	484.5160	353.1668	204.5502	505.2166	144.2191	592.6921	372.4829	158.1174	408.7032	340.9446	360.3547	130.6268	417.7406	286.1965	334.9435	450.1959	448.1855	293.2030	430.8760	401.0114	320.2490	345.6638	490.9553	392.6064	356.7000	404.4429	292.4489	145.9450	282.5005	257.5354	492.7464	542.0860	357.5589	437.7332
X603142222F1	2694.721	2337.379	3705.628	3323.540	3555.984	2952.377	2639.358	3000.769	3304.491	3152.008	NA	2766.314	3369.713	2246.342	2943.430	2723.676	2715.186	2122.814	2517.773	3234.840	2633.276	3136.909	2934.636	2358.516	3852.120	2745.789	2054.269	3536.553	2729.491	2434.509	3047.763	3033.743	2683.014	1823.390	2593.737	2697.153	3165.826	2897.853	3681.403
X603142224F1	251.26949	586.47099	838.97500	300.42026	1017.91407	811.43814	400.38414	326.09185	588.60511	198.91946	593.07843	803.36547	286.18212	230.65158	799.64249	787.01800	156.51215	648.05235	775.43496	957.14225	754.98019	852.07834	951.32921	455.27103	728.09964	664.24164	618.78932	826.10242	881.53856	579.74992	741.63322	877.81745	94.73114	80.77237	791.29262	897.44943	882.11011	793.03788	797.66073
X603142225F1	23891.05	17837.93	20199.72	23699.47	17270.04	20359.13	16847.36	25029.12	16107.38	19924.02	18421.07	17088.50	26727.95	27347.24	15407.48	15663.10	22976.14	18665.54	15158.66	17132.61	18321.61	15207.23	16232.75	19670.55	20065.89	17326.33	18973.68	20083.72	16665.53	17694.93	19181.17	16537.20	27156.29	24569.90	17448.96	15259.90	12416.53	13545.11	15838.67
X603142226F1	334.8995	232.5343	221.6056	706.2237	374.8722	227.0369	230.4269	528.6997	245.5540	628.8051	296.6407	252.8540	603.8663	713.4848	228.3812	286.6618	595.3877	252.0493	225.1843	250.5404	234.0540	270.0767	321.9876	215.8599	268.0694	253.1374	207.8176	355.3993	268.6433	247.0008	298.6136	246.7712	675.1435	378.7378	284.0137	231.6898	217.6659	262.6295	250.5211
X603142227F1	3082.3938	2470.6773	2874.2923	3193.2452	2607.7699	3252.3813	2266.3295	2139.6117	1272.1155	4024.7210	3641.1673	1782.4295	2196.0450	1858.6959	1429.5214	2643.9745	3921.5972	2941.2316	2543.1532	2127.9348	2799.8206	915.6661	2103.9794	3120.4485	3002.7310	2911.5619	2681.6339	2755.4600	1119.6406	1464.4858	2877.8607	1238.3135	2152.5092	4375.4170	2198.0286	1426.8097	1282.5534	1645.3371	1289.3399
X603142228F1	324.4249	557.1490	316.3805	331.8581	487.9045	504.3828	636.3484	479.9425	362.0699	830.8821	538.6171	865.0274	358.4534	291.0332	800.6970	638.7410	367.2786	451.6963	508.8673	484.2755	656.5319	634.8713	648.6864	447.6663	387.8373	450.2544	616.1578	588.2811	633.3472	416.0131	669.8571	548.1009	329.3036	183.5055	325.4606	429.9276	446.6589	496.0398	405.8498
X603142229F1	213.77400	95.71487	82.30217	110.99287	99.61911	93.91786	76.61477	162.37104	90.54137	114.03558	68.79859	94.09946	241.01544	138.63261	127.18933	98.69074	103.85111	121.19721	124.06509	152.70175	79.31643	107.32347	123.11087	90.89084	78.80339	75.40567	120.39016	114.42285	103.02737	91.03960	133.18915	142.32893	248.75909	101.89327	121.08042	107.81512	113.02180	120.59925	131.53419
X603142230F1	8832.750	13939.402	12389.190	7375.066	10345.831	13775.138	13628.327	6294.121	8256.259	8657.189	13012.839	10978.510	4965.933	9564.354	12116.151	13689.613	9174.544	16294.220	10090.526	8943.285	11393.943	8611.711	12801.176	13398.349	11290.214	11302.056	12463.860	11490.842	8683.689	10844.065	13618.295	7670.919	4164.744	5558.570	10642.453	11710.265	8273.494	7987.639	8364.654
X603142231F1	3941.690	5790.907	6985.159	3954.112	4321.614	5549.818	6096.364	3895.280	4237.176	3907.101	6641.492	4853.063	4571.404	2141.011	4757.577	5072.670	4642.326	5666.489	4116.535	3819.549	4958.061	4397.248	5590.807	6588.150	4627.783	5569.911	5062.461	4757.577	4340.492	4851.930	4896.665	3810.274	4599.675	3871.890	3545.107	4848.968	4558.102	3440.780	3822.118
X603142232F1	222.16361	65.74934	69.30862	109.42486	70.24331	68.14827	56.65338	54.12070	62.60663	171.15261	54.23408	59.81337	170.08043	138.38967	79.03364	56.46115	86.23575	47.75929	60.54445	64.50978	49.24157	61.50452	62.39073	60.03307	47.75464	55.73604	74.87968	58.12996	46.33450	45.07324	64.95006	53.68665	200.59827	154.40599	54.14396	53.56613	64.77426	66.42217	89.20916
X603142233F1	98.093744	128.452958	210.676686	116.500586	283.540422	306.949976	105.218273	121.090947	2583.053695	42.966492	563.371232	112.461824	140.814360	45.620600	132.823643	135.924112	60.595853	171.637214	351.296141	216.440735	2793.053722	229.302194	198.948565	96.713161	207.681917	367.369903	167.772545	256.730906	188.466290	2883.116986	148.717300	199.099845	42.940809	7.254257	233.342741	122.521905	180.667598	201.024431	251.459642
X603142234F1	33.32702	112.44562	150.77675	41.12654	83.26048	105.16933	70.71805	38.73828	94.82344	37.18431	128.24670	80.92679	11.90916	23.78756	91.11251	143.63725	50.00357	114.82272	113.26006	71.11753	86.96743	82.67081	61.55577	91.67032	78.13836	124.26980	98.93618	72.59080	71.10445	100.33002	86.18177	42.49701	23.87414	21.82294	117.69750	85.85893	64.37911	91.29095	68.01674
X603142237F1	493.4505	1150.0674	1570.4786	930.1368	1110.3974	1373.9789	1042.3288	915.4807	1011.1576	764.6699	1324.6523	1086.1731	927.1871	222.2522	1160.2878	1168.1472	752.4271	1145.0113	858.9297	849.0100	1054.9166	936.1378	1392.4468	1243.2220	1099.0583	1180.3366	1037.3023	893.2343	1025.4405	1106.8643	1303.3421	998.6159	586.7704	454.5520	918.9231	962.3658	788.5153	1027.9425	1110.7094
X603142238F1	14.022964	11.179154	12.997228	13.593877	13.358755	15.188996	20.303436	13.499138	14.511241	14.869008	13.522843	11.920979	9.789328	12.935407	14.793383	17.782633	17.484266	13.655910	12.950800	13.361572	14.662382	12.688283	16.003278	12.436303	12.709772	18.742202	17.321135	16.117129	14.899382	13.131494	19.314451	13.180258	8.335615	12.049294	13.378412	14.575186	17.288282	13.951591	11.848350
X603142239F1	62.65505	294.98906	50.60362	138.12719	312.48993	79.15692	84.12169	104.07989	594.16792	41.56330	55.47705	82.29254	130.95425	91.40094	750.74959	268.34216	34.27284	79.74160	192.30524	92.61478	202.33637	134.87244	66.94720	67.78222	100.03148	99.93497	88.43382	116.63015	126.40530	489.70850	154.53931	244.30843	65.49448	49.55278	500.78136	91.23617	89.22553	361.41422	122.45589
X603142241F1	3045.598	3776.265	4655.930	5322.923	4300.775	4151.680	3136.094	3515.207	4504.301	3427.574	3112.569	3887.695	6187.901	4812.486	3037.416	4374.333	3704.653	3255.682	3540.460	4622.486	4336.421	4617.604	5270.533	3256.172	4459.012	4437.974	3099.145	4519.051	4316.772	2832.777	4211.707	5610.231	3442.978	2489.803	4358.866	4532.011	5772.534	3670.349	5265.187
X603142242F1	200.46642	534.23965	846.38374	195.05484	376.59289	907.07500	414.51476	208.85844	268.67987	116.44763	791.78236	465.32283	105.66810	42.94494	436.43126	575.15608	190.97707	557.04306	388.24946	390.54270	386.51583	230.21373	809.60270	795.73211	396.83464	522.89636	519.02196	360.21084	222.81661	242.06487	622.74370	219.80919	27.37309	72.08984	442.80850	491.87662	244.76514	228.37713	255.82818
X603142243F1	4779.993	5003.355	6751.650	4978.764	7017.858	5877.547	4557.625	4645.706	8233.302	4803.382	5917.250	6313.875	5289.761	5835.512	5561.459	7123.091	4338.397	5078.622	5738.977	7887.121	6082.357	6963.565	6525.013	3860.689	6766.449	6278.029	4732.920	7438.086	6059.909	5553.966	6714.278	6931.008	3955.687	3493.186	6967.908	7097.232	7676.622	6022.033	7808.646
X603142244F1	2000.931	2762.627	3031.741	3186.167	3463.215	2571.699	1776.483	2801.116	2223.880	1945.790	3760.308	2436.651	3023.588	1923.775	2747.130	3007.016	2408.630	2409.475	2483.042	2070.580	2141.573	1835.668	1843.597	2685.135	2207.974	2489.206	2325.904	2187.188	1723.793	2431.852	2321.031	1406.469	3496.653	1954.834	3446.135	2259.732	1968.836	2911.705	2436.368
X603142245F1	191.9564	250.7104	234.4822	191.4198	219.7825	216.1428	292.5824	192.8486	704.9614	162.1646	198.7476	226.0083	176.1965	399.9809	162.4925	211.0614	167.7160	196.7802	240.2663	204.5559	751.9974	282.1114	258.6691	166.3225	241.9879	237.2047	221.6304	271.1930	219.0824	258.7152	173.5144	275.4165	315.4949	317.2979	125.7969	185.9785	347.0419	239.0231	259.1543
X603142246F1	1313.3774	1332.7105	2312.5888	1289.1755	997.5441	2966.9508	1818.7396	2722.2041	1278.1574	2898.4620	3217.2746	2932.4875	3017.0627	1630.8323	1361.1998	1924.7617	2373.7727	1438.6146	990.8612	1309.6168	1396.5836	1130.8422	1959.9312	1445.6038	1287.8457	1966.6615	1414.1362	1279.4947	1377.7175	992.0964	1446.8318	2041.6944	2027.4386	1746.9725	639.7030	1356.4567	1466.9959	844.9911	2383.8404
X603142248F1	10938.541	13953.750	14791.979	10896.133	15126.007	14494.034	14129.972	11419.657	16336.725	11753.689	12545.780	17060.159	10239.807	10152.156	16987.508	14359.189	11165.996	12740.956	15371.106	14222.622	14835.888	17680.658	16201.400	14169.134	13900.703	16278.486	14774.479	14708.815	15266.519	17346.922	14155.335	16548.233	9971.879	9998.354	14732.812	14689.389	15046.572	14964.733	16651.668
X603142249F1	33.18150	28.79589	27.95319	35.40048	46.63456	22.63154	24.56741	31.02760	147.82553	49.24610	34.73430	32.65861	24.69583	25.52769	36.49604	21.82743	40.14031	19.89624	16.12653	33.84983	93.73648	45.40961	10.20645	25.60342	121.58072	19.05857	14.23540	50.14416	17.77699	107.72051	16.05080	11.74425	33.01066	21.73126	25.37669	19.36834	27.98120	23.22934	56.02289
X603142251F1	17130.63	17388.77	19402.46	18697.63	15889.93	20849.67	16420.10	18038.30	16687.21	15728.36	17061.77	16790.83	20605.78	19389.09	14579.06	19068.42	16458.30	18449.67	17561.72	18036.84	19295.27	16236.42	18803.43	17791.35	18425.53	17740.70	14408.34	17726.83	15419.11	14340.34	18916.91	17539.09	17804.35	18815.33	17478.41	17660.26	16432.58	15227.71	16904.61
X603142252F1	596.5746	431.0962	394.0082	457.2643	611.0027	479.0214	457.6568	384.4297	997.1487	474.2126	388.8857	617.1160	395.1243	700.5713	538.5131	464.2769	377.5985	517.8461	467.2421	618.6002	415.1798	605.6443	631.0889	401.4579	481.9464	408.9412	675.9375	381.9622	622.5505	763.6848	436.8959	533.6219	517.6833	856.2657	397.2010	827.3188	757.8092	748.0461	302.5035
X603142253F1	1119.0992	1497.8149	1359.9535	1134.1046	1016.6395	1268.5442	1697.2864	1555.3723	811.5191	1070.9353	1292.2935	1405.5376	977.9299	502.8407	1291.2677	1254.0295	1357.8604	1559.1477	1496.3112	907.6672	1028.4636	1505.1906	968.2971	1978.7065	1371.3069	1358.1645	1604.2963	1042.9619	1011.7445	2062.0866	1234.8862	1254.1160	1593.2724	1513.6109	1250.4518	1522.5876	1345.0075	1650.2904	1003.6121
X603142254F1	8.941450	8.072135	7.386020	10.121945	7.237355	7.402338	8.444129	11.279670	8.415952	9.279041	7.054211	7.883083	13.238641	8.981244	7.545472	8.249203	10.252361	10.287472	12.160687	7.695822	6.822935	7.491455	6.352181	7.036605	7.228368	8.574110	7.239072	7.368314	7.172950	7.144341	10.681602	8.590215	9.708282	8.345035	8.468575	7.069216	7.687719	8.276712	7.182553
X603142256F1	250.4599	402.7244	1296.3853	636.4260	370.8457	414.6502	644.0193	1075.7622	679.0460	556.4566	NA	819.3145	331.6942	194.0301	414.5365	520.6225	551.1272	488.0472	766.0938	614.0769	293.1801	366.1611	503.3537	415.1611	637.9945	480.3534	373.7236	1156.8772	474.2988	428.0628	434.8864	436.2027	311.1597	192.3925	521.8425	394.8065	878.8213	422.3197	752.5531
X603142257F1	512.2609	717.3591	835.8063	570.0933	809.5188	765.2975	763.9409	569.6843	1184.4545	485.2834	698.8463	672.1683	544.6553	1012.4252	892.0232	872.3682	605.5872	998.1315	883.9706	907.2581	1131.7844	915.2107	707.8509	656.7470	902.9930	985.4937	798.6239	807.2211	707.1810	515.9795	798.9899	661.0676	528.7726	609.6890	1045.4013	964.5243	1072.9198	827.2692	1049.9186
X603142258F1	3095.215	2792.823	3522.470	3182.208	2735.225	2863.928	2673.494	3225.590	2344.824	3527.843	2384.981	3203.116	3262.195	3139.416	2453.240	3372.700	2993.763	3522.997	3954.713	2978.799	2962.049	3162.836	3120.555	2519.581	3387.282	3005.896	2591.173	3018.762	2846.124	2603.259	2900.219	3692.702	3380.516	2694.342	3229.149	3320.458	3045.604	2877.313	3032.463
X603142259F1	43.02099	87.98017	73.03739	32.32447	38.39805	159.86052	42.04970	32.91778	129.78289	27.29275	72.09576	60.86346	21.57567	27.08113	51.37384	74.67032	45.93518	93.61015	33.64850	51.65821	119.06402	27.74079	45.22758	64.69528	85.73782	113.07908	78.17141	77.83181	30.38496	39.57820	172.38421	16.03103	14.27555	12.46136	71.10289	69.39231	50.42105	36.14863	36.22385
X603142260F1	59.40496	19.12042	26.29362	54.27435	27.35909	27.57248	21.49286	47.98907	16.93849	73.08126	24.40687	22.83476	56.93422	41.33112	29.26799	26.95791	70.92408	49.70545	14.20521	24.94270	22.06306	31.40685	20.73378	29.37895	16.28453	15.30935	33.25156	16.49083	21.87144	21.19946	15.14666	21.35278	42.58609	46.03143	37.46152	23.57418	18.51093	22.86838	26.42561
X603142261F1	13953.97	13554.85	14246.70	14438.40	15343.47	14251.84	12739.88	11952.07	13963.49	14506.38	13656.56	15019.12	16663.59	17760.70	12898.33	14294.05	11743.87	12890.90	12149.43	13881.90	13917.48	13360.45	14849.17	12341.09	13553.23	13376.73	11343.60	15028.22	14385.13	14515.01	13840.66	15795.67	11561.06	12158.07	15406.63	16095.78	13986.92	14052.33	14986.15
X603142262F1	51.02983	57.34326	58.40284	69.20841	82.42076	61.76563	42.79995	65.23682	126.85800	56.36948	45.93520	56.96966	47.99200	105.68219	70.95517	57.39715	53.36878	63.96970	82.91907	67.42104	211.44045	50.84854	55.56475	47.29829	77.80392	66.69020	69.33700	143.26633	75.32062	149.73011	69.18014	67.08416	42.49441	44.65304	126.06404	72.37308	73.35393	96.15526	74.60179
X603142263F1	82.65548	131.21457	150.97952	78.25819	98.18992	100.98729	102.76818	84.31653	116.83962	86.19312	143.28550	117.81758	84.28941	61.50571	78.75397	147.69210	73.44627	103.33739	86.82173	124.39317	112.95342	197.49120	113.74637	130.68067	111.22452	115.57542	113.81442	124.83799	79.82286	82.18225	122.40512	77.48825	59.83567	60.11891	86.36803	169.50676	94.54067	82.96997	86.32862
X603142265F1	83.36887	203.73116	177.51733	144.37396	151.55670	220.54877	230.06125	90.50386	130.73942	93.55610	247.28316	191.47662	63.84253	73.92963	165.45702	185.48552	69.14501	229.64655	146.08635	136.19160	151.80307	147.73504	235.75392	244.61867	132.20467	157.97911	157.30896	132.73934	137.76348	145.73474	179.34872	177.59431	84.00399	176.05228	122.57918	210.58126	232.65682	165.51912	147.09130
X603142266F1	48.93989	181.05435	250.05229	107.24059	168.30824	189.67149	85.01758	94.38215	150.27674	29.71139	93.88271	165.82141	99.58312	25.51987	203.03582	206.11684	36.36685	203.39988	172.01646	157.48932	140.47115	176.62037	174.40107	80.89739	226.72053	220.43809	174.22035	179.24339	208.44396	158.84317	203.50167	227.31061	34.28690	19.76147	283.95781	202.65777	212.12140	229.12044	142.44358
X603142267F1	467.64135	119.46520	120.26833	193.25773	122.09820	114.50885	363.10414	191.12709	129.75466	521.70319	179.36426	110.21353	145.02724	88.15368	119.66980	142.69653	547.77572	175.71687	160.42223	120.60540	165.63690	114.21083	168.91027	189.19045	73.28793	133.23341	163.93252	99.47281	139.21825	110.44214	166.78773	136.74949	323.53776	404.89625	135.84159	99.97794	89.80763	127.34176	103.51097
X603142268F1	7850.898	5096.685	5125.205	7586.055	3872.821	4591.039	4119.998	7738.439	2569.646	8241.541	4993.810	3836.009	8358.744	4859.341	3163.612	5284.175	9227.251	5625.999	4441.675	4165.504	4689.893	2611.570	3870.469	4558.512	4672.716	4945.789	4603.797	4744.112	2996.934	3385.831	5094.837	2926.292	9003.540	9187.121	4664.967	4169.579	3058.380	3306.860	3017.073
X603142270F1	32.94894	19.43590	17.98385	26.54780	18.77636	23.11625	19.58487	28.70594	24.33040	19.70787	19.37569	24.56191	25.92665	34.26939	19.16491	16.59440	21.26171	18.13885	23.08404	19.25760	18.52904	29.10391	31.66544	20.95420	16.16550	24.23830	20.28799	25.36831	25.07628	21.75389	23.72404	24.21549	24.32491	28.08343	31.04567	28.03440	34.49307	22.19135	15.00350
X603142271F1	2150.170	2198.461	1636.593	1989.670	4001.651	2569.820	2566.830	1639.980	3305.488	2570.167	2019.135	3099.056	1156.632	1752.023	3584.671	2859.379	2197.249	2755.446	1912.508	4105.510	3875.892	2514.867	3638.325	1556.355	2749.903	2123.766	2728.634	2788.274	3334.621	2867.011	2560.719	3076.659	1390.174	1459.534	2691.057	3115.960	3861.279	3043.042	3258.905
X603142272F1	1501.5386	1543.7888	2109.8487	1275.4574	3522.7247	1738.0815	2195.8780	1065.5538	1696.2595	1315.7816	2641.8293	2446.7864	680.8821	1414.1481	1842.8271	2093.2908	1008.8651	1969.9199	2025.7353	2777.0931	1855.1979	2023.5766	2221.2457	1957.2510	2043.8377	1938.1149	2194.7945	2555.9421	1293.6642	2343.9420	1742.4974	949.2838	784.8597	947.2184	2998.6842	2523.0793	1503.5176	2462.7495	2464.9581
X603142273F1	9124.851	14567.345	15518.486	10594.344	16466.996	14607.644	14948.777	9904.479	11227.016	8048.002	10823.370	12027.829	10379.866	8094.735	15186.057	14757.424	8966.153	14749.137	13791.380	12713.311	13031.769	13410.120	15051.709	15923.600	11524.640	15584.685	15299.236	12709.995	12357.502	17058.678	14941.671	13162.147	8851.638	9282.765	14553.932	13845.206	12977.283	15048.501	12570.213
X603142274F1	208.34288	73.08172	70.99004	83.32439	51.11613	109.57455	72.44819	59.00357	52.70826	102.26374	71.00698	32.11248	54.05647	53.11007	28.97019	133.17890	74.73676	98.13951	90.06635	73.07032	53.64578	16.47873	57.59438	183.15513	69.22709	82.96305	74.14003	97.26708	19.25458	22.07383	163.52684	16.06931	39.69057	125.51485	111.03826	19.95106	31.19622	26.62786	25.56971
X603142275F1	7054.076	6106.533	7778.546	7616.088	6802.543	7211.322	6195.645	5861.065	7439.068	7465.226	7319.423	6012.619	8233.295	7330.657	6314.788	7307.631	7934.463	5892.720	5741.068	5614.304	5946.581	6651.801	6900.409	6230.963	6179.229	6504.590	6111.062	5859.663	5328.447	6077.664	5641.434	6280.019	8104.286	7100.185	6298.192	6021.883	5475.238	6081.008	5614.304
X603142277F1	58.67312	189.36063	488.73568	69.51262	245.23744	373.15722	156.93490	66.32257	192.93222	27.08518	297.95275	201.45925	27.46582	10.07844	165.56817	318.27109	37.57954	295.84858	179.92057	258.88903	224.19325	112.72958	460.72175	320.35518	306.62675	305.28309	194.05600	247.54834	146.14578	116.08883	350.96064	136.72098	7.91107	11.57530	249.17193	263.67246	128.51266	118.06638	148.31216
X603142278F1	14.92387	16.84434	15.40481	15.56316	18.78149	17.43144	19.22120	16.53007	51.46624	12.09203	13.44424	18.26144	18.29582	12.47801	14.49514	15.48270	12.01434	19.51786	26.71335	17.73961	20.20825	22.65065	10.99524	22.56521	21.63724	29.77647	25.54082	20.67889	16.86541	18.42198	13.69268	18.04182	12.08932	11.45852	22.01662	12.78759	12.21147	19.54423	16.87394
X603142280F1	2455.924	2275.523	3132.520	2539.941	2114.481	2380.564	2246.598	2911.413	2213.238	2275.349	2994.814	2191.764	3471.754	2765.616	2058.515	2204.379	2767.328	2217.972	2451.017	2513.041	2250.629	2633.752	2681.241	2281.929	3409.113	2603.925	2235.244	2599.330	2434.890	2111.064	2103.091	2235.965	3186.624	2479.901	1575.454	2257.451	1681.376	2064.053	2511.188
X603142281F1	36.80387	25.74334	31.96179	57.16036	17.04468	28.48559	22.65722	53.77050	37.92897	41.60078	26.08757	22.16073	64.65192	39.53234	36.21716	33.66799	52.41925	14.92635	23.11574	26.09204	99.02995	31.34841	24.92054	27.57543	19.72909	31.23912	20.13249	23.15485	26.64980	35.34543	30.29424	25.40782	40.50810	65.54400	22.56245	30.88416	19.85724	26.51698	27.90875
X603142282F1	352.1278	347.0567	1056.9292	698.9710	476.5224	616.9522	608.9804	724.1505	711.4543	452.0301	446.8223	728.7061	605.0709	1577.8448	443.2550	540.8583	405.7825	471.6219	571.9861	1015.2143	521.4132	601.0029	632.6139	976.0581	1357.7461	617.8428	408.2379	1624.2447	622.0640	610.4535	638.4764	598.0890	395.0867	213.2581	592.4501	514.0793	609.5623	468.6882	1069.9733
X603142284F1	168.35192	79.77826	95.23550	81.91616	77.46404	69.03133	64.23475	102.28931	73.46278	104.67928	52.58683	87.51723	114.88263	219.72689	94.64215	58.68095	110.56798	61.62393	71.49281	84.67213	70.28042	119.28110	95.63852	81.91197	56.39652	52.10642	77.36236	72.71905	110.81211	68.54342	82.08460	90.44371	154.34401	129.79641	87.64973	78.81277	84.99000	69.85470	92.18733
X603142285F1	5362.6945	6792.6116	2825.7618	3632.7366	7065.2773	2713.5628	9620.0026	3677.6460	4222.0718	5505.4516	2172.8730	9554.5355	2926.9141	4146.4771	2852.7753	6620.7638	5499.3678	10223.9161	6122.4958	1025.0813	5896.0420	3498.4284	10188.1745	9470.8300	3666.6427	4097.9936	5476.3376	841.7373	7440.3934	2419.5522	10251.0625	10567.2845	5705.9277	4425.4822	5431.9144	7269.3956	6635.0895	1925.6837	5462.2998
X603142286F1	8536.763	6794.152	6628.316	4835.149	2793.026	6505.585	11015.633	7414.647	3102.734	12573.802	8896.603	3086.553	6110.660	15516.189	3759.155	4368.250	7200.422	5747.905	4349.143	5171.403	5820.207	2542.117	3193.916	10183.442	4967.149	4347.401	5922.563	7785.712	3756.443	3405.588	5105.941	1834.936	4678.645	10428.020	2888.359	3090.127	3604.441	2757.984	4042.265
X603142287F1	33708.51	39667.64	39649.12	32109.43	37235.12	38844.12	37651.15	31622.76	37038.64	33377.23	36478.74	38092.45	33505.66	32021.93	36883.80	36136.18	30982.71	39103.23	38129.79	40156.09	39507.99	36185.53	38876.12	40870.09	38129.79	41173.79	39986.21	36810.30	37355.10	37077.31	39075.64	35229.06	32114.18	31319.00	37885.89	37788.88	36185.53	38592.19	40243.33
X603142289F1	65.73812	108.45799	149.32432	99.29700	76.56953	77.33560	87.06382	88.89513	234.08275	65.45475	54.24613	152.75756	210.28620	29.53892	82.13990	110.16539	86.22979	97.70890	111.44484	127.14218	232.75246	187.40173	106.82923	81.05667	114.57869	223.26874	117.55915	87.54889	97.82431	138.06590	114.02655	80.30875	73.22873	44.61196	99.76047	114.67474	152.33956	116.68002	129.22363
X603142290F1	78.69768	146.62152	106.52962	77.79021	197.44394	102.34674	96.96681	67.11160	297.86059	70.50507	79.55193	163.75834	52.91795	168.68447	122.01112	124.94249	37.96545	105.15278	116.31020	304.23588	212.76890	110.39717	115.04389	112.55236	284.40208	118.03550	77.46171	260.59973	175.08549	122.55754	138.73826	112.22350	44.81015	75.22583	211.01364	156.87918	135.72974	121.39867	148.48019
X603142291F1	147.31098	515.32641	482.55445	298.18261	223.54690	244.52020	677.35377	377.60221	1871.47531	151.54063	130.98881	504.70056	31.51225	918.91603	124.69805	243.25288	93.62973	382.21229	546.09439	685.27357	2313.01019	203.71562	236.34747	857.12769	900.24237	301.29083	184.14909	1292.24805	486.53569	1295.17884	411.14678	251.63375	62.64674	185.58378	518.34052	306.87609	280.64764	331.52291	596.63916
X603142292F1	505.3182	732.5036	412.0247	1689.7426	3295.4302	388.1090	386.0151	329.3034	876.6693	347.3588	3799.4246	500.1332	1466.3607	891.1101	1793.4690	684.4561	168.5198	355.9314	579.8566	591.3169	372.4529	478.6692	328.9220	119.4743	326.4255	363.3848	580.1645	241.9843	540.5208	2783.3794	518.0099	1045.2614	580.7273	237.2328	2700.4628	959.4776	1091.4606	2636.8572	1497.0473
X603142293F1	16.73009	12.01668	12.25952	18.71359	16.33835	15.65409	13.95191	14.54612	12.58481	15.51551	12.34212	10.42380	17.19539	26.34682	13.50685	11.88742	14.60728	12.94771	13.60260	12.61804	12.89919	11.78742	13.60576	11.23844	13.15973	16.83732	15.62309	13.69895	13.21071	13.86886	19.73606	12.48876	13.84480	13.76186	13.64501	11.87854	19.12387	12.93597	14.29388
X603142294F1	3967.789	3716.053	4347.988	5322.484	2741.673	3938.560	3723.205	4344.500	2242.088	4899.849	4167.439	3241.128	5750.312	4740.881	2809.398	3259.477	4565.630	3779.918	2692.126	2749.435	2760.235	2611.912	3365.171	4125.890	2992.521	3422.349	2833.033	3235.841	2380.673	2777.186	3157.347	2246.439	5289.756	6322.080	2851.160	3091.972	2701.183	2424.892	2570.092
X603142295F1	20052.94	28142.41	27383.60	20652.66	29663.19	29901.61	27006.88	19692.84	31847.18	20633.77	38565.83	27880.83	19964.73	21855.48	26754.18	28111.12	19738.94	27803.04	26816.63	27429.19	29460.12	25286.04	26254.98	23518.35	28704.47	27082.08	25978.19	28897.70	25846.37	28029.53	24519.55	25418.41	16859.97	16823.32	32152.01	26927.23	31024.72	32664.73	31255.48
X603142296F1	1683.1460	875.2084	796.6447	1359.1373	408.2398	678.5131	1024.2602	620.5094	363.8233	1956.1484	843.5776	523.6459	1140.2505	1259.5877	665.3523	576.7576	2056.2994	832.5655	388.4523	357.1865	416.9161	387.8955	671.4399	947.9432	423.7595	627.9943	641.5983	495.7778	367.5569	408.8522	641.1694	279.4930	1568.3447	1844.1476	476.5040	490.6547	406.6786	378.6131	431.6000
X603142301F1	248.4053	417.5202	352.2822	340.8612	271.6360	264.5517	288.1455	470.9568	428.6885	292.8996	239.1060	259.5866	294.6882	290.6366	343.0653	375.8137	349.0480	456.3818	438.8233	299.8596	272.2580	403.6703	239.3978	279.7264	411.5038	523.4809	382.7308	299.4064	292.6926	275.3185	459.7363	448.5524	291.7662	213.5789	479.6784	280.5458	311.7403	325.0772	348.6269
X603142302F1	4948.275	3185.047	5640.536	4447.682	2962.355	4430.923	4031.428	6767.267	3916.640	5199.633	2165.567	4642.016	5379.015	5203.820	3127.189	4548.022	5706.092	2624.045	3186.171	4763.456	5704.126	4081.623	5467.048	3533.771	3310.883	4365.486	3293.864	3835.249	3886.425	2173.412	4697.874	4360.654	5736.728	5294.086	2569.530	3321.229	2962.322	3434.203	5439.982
X603142303F1	2879.3530	2628.1861	742.4011	2604.5661	2125.7611	2672.9700	2115.4205	3124.8926	930.9124	2883.3007	2037.7840	2231.2640	3310.2872	2095.3185	2635.3067	2590.0920	3613.9714	2420.6587	2626.0243	1537.9441	1811.2940	1158.4851	2092.1126	2149.5706	813.6103	1607.5235	2574.6296	1698.7561	2249.7077	1897.9303	2263.4149	1315.5822	3948.1124	3001.5494	2432.6850	1440.9040	814.6333	2486.9625	997.4132
X603142304F1	487.18464	45.03347	74.28538	95.13990	77.49272	65.85943	44.34202	278.39174	33.95541	311.89473	99.25585	57.99733	164.52795	346.10067	77.82497	60.59429	318.77016	43.04291	49.93615	59.74261	66.02753	67.40817	60.58053	76.59720	62.01451	21.58763	57.20143	60.67963	56.76703	61.60562	41.82071	55.96900	700.75590	624.17250	49.90406	70.49905	45.15010	38.76981	47.23107
X603142305F1	30.65781	107.01990	116.52029	69.80959	129.81230	65.90492	60.65873	82.24559	381.47056	19.31417	105.42819	50.84931	33.30871	24.63908	77.58328	82.68289	23.04092	67.19710	66.64877	132.79237	133.52395	79.29025	51.16415	86.02645	178.38646	87.54943	37.57155	286.77549	112.94089	483.99635	64.00474	96.95010	30.24496	18.31184	192.64399	52.91988	123.03896	127.67328	131.76268
X603142306F1	5060.891	7262.845	3218.008	4284.468	6924.649	9286.953	5430.116	4228.905	5444.240	4818.003	6246.564	8379.945	2633.694	3562.921	8575.509	7852.647	4334.953	8347.320	5920.644	6604.428	6567.375	6727.244	9158.235	9638.266	6256.240	6105.220	7536.696	5806.708	7891.430	5541.228	8519.079	5856.973	3552.119	3814.844	5682.905	5312.277	6472.380	6180.942	5507.107
X603142307F1	4075.994	6976.664	5543.277	3606.681	4489.675	5471.208	5260.026	3912.869	4798.288	5581.930	5248.482	5648.739	4315.701	3510.747	4722.010	4432.746	3869.855	6931.497	4394.000	5470.330	5139.537	5219.357	5482.780	6397.156	5902.734	3355.253	6879.077	3843.682	3098.567	4062.133	4257.519	4300.248	4304.591	5910.060	4655.550	6531.539	5663.425	5005.440	3795.255
X603142308F1	4024.181	6495.784	9463.949	3900.299	11690.851	8493.311	9391.183	3462.207	10392.501	3854.172	6329.402	9504.351	3261.676	4713.587	12078.115	8706.167	2575.491	6972.079	8668.663	11416.060	11031.800	9494.088	9226.548	5075.429	11172.502	8361.163	7722.114	9977.258	14684.071	10714.663	8486.213	12148.175	1807.616	1745.499	10832.262	10230.788	11439.328	11597.287	10607.140
X603142310F1	3960.528	4511.586	4192.635	4352.681	3432.631	4065.251	3508.851	4103.772	4165.325	3792.891	3610.314	3682.250	4865.005	4869.398	2954.358	3440.670	3856.277	3429.061	4113.717	3983.142	3968.371	3845.558	3616.712	4861.973	5389.869	4412.455	3683.382	4233.188	3390.720	3828.002	3741.985	3303.856	4391.969	5226.702	4067.260	3208.771	3264.070	3175.065	4717.353
X603142311F1	341.1910	508.6320	447.0094	319.1457	415.6786	777.3808	767.0059	582.4472	337.4512	450.4579	649.0459	721.0616	419.6573	151.3335	524.6124	536.3701	694.7090	684.6391	445.3220	308.4323	682.5487	680.8579	609.2956	648.7949	306.1981	735.8488	657.8872	304.8705	612.4421	489.5266	664.2658	600.6962	417.8829	574.8784	396.2290	397.1912	351.2113	342.4884	379.7704
X603142312F1	5140.494	2866.097	3417.548	4305.125	2967.704	2601.695	2883.330	3135.620	2876.932	4654.668	2775.960	2817.377	3621.758	3859.994	3717.758	2845.502	3677.087	3158.964	3032.618	3278.390	2766.511	2595.736	2942.293	3187.870	2705.487	3490.796	3049.032	3094.993	3191.485	3636.338	2753.119	3038.883	5071.916	6261.225	2878.972	3530.792	3451.748	2904.172	2559.489
X603142313F1	4852.760	6813.129	8085.219	4577.799	9022.014	7704.574	7692.406	4190.865	8369.088	4088.962	6721.567	7448.161	4284.144	7119.548	7256.465	8093.466	3551.272	7656.066	9606.394	9474.597	8120.395	7414.163	8606.375	6515.305	7576.881	8807.909	8435.467	8055.557	7867.375	7511.257	7375.056	6818.738	3661.967	5034.429	8588.782	8494.980	8356.345	7482.363	9118.298
X603142314F1	19.78809	34.79192	37.40429	15.98328	33.31347	35.15737	20.53609	40.96395	40.08902	17.52420	45.82666	50.80704	30.30359	16.15902	24.13691	39.70712	33.84673	47.79957	79.39830	26.34260	91.37668	46.38069	35.29662	24.54326	49.71028	45.65802	22.37621	15.45054	24.10166	24.81573	34.89693	40.53063	13.02888	17.65092	32.01465	18.99736	19.26906	19.20068	53.40526
X603142315F1	238.45398	70.07425	92.87888	168.28138	109.75654	97.94240	111.75616	91.81038	62.80770	278.73543	92.51439	75.01732	162.07659	202.41407	74.38707	99.14131	345.49716	91.40957	93.95994	104.86391	97.25254	71.79219	103.75021	79.70946	88.00589	91.50957	107.37176	93.17359	57.81428	61.77646	79.55826	52.54857	218.21688	131.35742	85.48616	84.98824	104.04393	64.01873	61.15658
X603142316F1	3568.331	2486.331	2964.687	3026.448	2252.306	2206.509	2215.433	3139.748	9302.559	3291.837	1862.811	3805.999	3031.641	1339.792	3239.344	1420.224	3184.685	2368.918	3735.095	2302.584	11009.057	3759.039	2823.405	1800.753	2513.926	3482.281	2896.544	2342.155	3376.881	6395.757	2202.787	2621.512	4188.671	3339.162	1842.989	2649.080	3091.515	2190.506	2746.047
X603142318F1	1875.2775	2658.7118	1050.2531	1967.0977	1999.8561	3034.6534	2172.2747	1833.8041	1368.3870	2178.0130	1788.7679	2071.2136	1531.6468	4548.4343	1973.7522	1831.2709	3092.3294	1399.3249	1134.9236	1972.6146	1880.1232	1681.6308	1388.5483	3267.2168	2182.1091	1146.8845	1534.2673	2419.5720	1828.7507	3559.8185	1895.9328	1261.6091	1733.9665	2700.5234	2213.1143	1937.4361	963.3193	2077.0180	1674.1679
X603142319F1	6219.060	5348.541	4900.662	6126.078	4691.232	4705.918	4320.300	7562.534	5413.161	6481.030	4413.526	5983.258	8335.885	6280.160	3843.771	4815.447	5156.029	5006.608	5276.005	5054.189	3876.970	5939.537	4781.540	5947.836	5005.612	5239.310	5725.886	4782.971	4097.806	6623.270	4355.326	5190.982	9003.840	8602.152	4680.543	5904.574	6648.309	6250.815	4775.213
X603142320F1	10301.163	10190.606	12131.798	12255.501	9460.609	9204.850	10075.188	10271.252	9345.644	11537.206	13479.233	7909.927	10249.140	10892.856	9545.017	11266.866	11495.948	11444.815	9322.604	9822.598	10168.311	9768.146	8981.471	9898.362	10175.523	9225.425	8779.486	10175.035	9115.642	8165.663	11214.750	7227.341	10696.026	10263.143	9646.807	9203.470	11046.855	9277.452	9932.655
X603142321F1	18198.77	23885.44	25802.49	19723.90	19498.24	23115.18	23503.80	21827.42	19425.85	19568.11	22118.66	18708.47	22363.26	21036.28	19818.10	22679.30	19152.43	25211.35	23519.37	21412.46	17151.89	18846.60	22241.35	25085.56	22118.66	23146.06	21663.85	20882.29	22169.49	16120.27	23000.71	23254.35	20880.12	20054.95	22821.39	20346.87	17425.97	18451.09	19289.79
X603142322F1	5922.259	7778.934	8215.509	6561.687	6668.863	7672.172	7356.216	7282.836	6455.699	5825.355	6799.712	7240.078	7433.310	4903.356	6052.488	7361.847	5810.397	7101.172	7913.697	7179.811	6808.759	5976.646	6599.734	7512.710	6687.920	7179.320	6509.191	6742.302	6595.994	7373.234	6765.789	7412.825	8319.182	6369.154	7806.285	7066.206	6482.474	5947.160	6598.809
X603142323F1	4827.423	9806.967	5565.626	3281.343	3688.389	3288.984	4698.331	6212.369	4362.501	1904.066	3281.170	4614.962	4926.446	2840.077	3283.055	5075.055	4727.651	4785.586	8318.576	6720.247	7123.449	9395.915	3696.090	5589.614	8379.733	9416.105	8763.007	5093.222	6491.309	7912.485	2946.674	7566.740	3331.765	5816.018	2258.367	2486.500	7164.493	5895.091	8914.836
X603142325F1	580.6985	772.0397	1211.4757	734.0750	651.9917	813.9018	592.4945	845.7953	700.3704	609.6384	942.3328	645.5733	1443.6912	965.8415	751.0494	647.8667	683.6176	722.2607	710.4441	722.5341	580.5753	962.9795	689.8570	641.8064	949.6226	918.6629	556.4689	891.4052	692.8986	597.1562	595.3909	760.5410	815.5133	475.1779	662.8361	725.5936	529.6574	662.7649	697.0440
X603142326F1	6398.340	6465.498	7287.890	6705.344	6878.340	6447.018	4949.311	7121.264	7047.396	6327.939	6155.007	6237.977	8984.485	4539.352	5805.186	6790.104	6891.434	6048.358	7066.323	6926.525	5762.268	6640.531	6653.416	5573.966	6726.010	7315.583	6448.554	5806.088	4960.985	5254.425	6324.623	6636.865	6452.479	6520.114	6082.816	5991.488	6128.794	5729.243	8199.234
X603142328F1	474.0688	616.1992	330.0257	519.2861	266.7038	548.6009	822.3005	723.0146	265.3443	658.2361	450.0081	263.7730	569.5268	536.9562	411.9936	384.3322	549.6032	536.9986	687.7046	275.2080	310.6624	365.1533	420.7349	808.1171	270.1596	647.9828	553.9857	281.8982	291.7855	253.8297	504.3058	409.2310	917.7837	1312.1901	436.5152	236.5536	325.8637	341.1589	312.0572
X603142329F1	7.739429	9.700439	7.415814	9.308921	7.684088	7.974546	7.753343	12.701707	8.481437	7.844296	7.151881	8.539586	13.197678	9.981070	7.420775	8.354182	10.534937	8.605505	7.334516	8.288796	8.706353	6.656371	9.435189	7.099061	9.553182	8.294121	7.293836	8.208075	7.017488	7.431744	9.192066	7.527587	12.186850	7.574124	7.379349	8.356099	7.624389	7.268278	7.976986
X603142330F1	5884.346	3423.322	2049.730	5775.737	3330.356	3431.372	2696.381	6343.175	1864.461	6760.052	3313.469	3207.346	7117.278	8018.846	3534.623	3447.768	5922.316	3238.254	2925.679	3474.321	2840.437	1868.329	3178.204	3494.107	3763.842	2368.158	2772.877	3890.788	3305.217	2792.698	3516.888	3059.169	6952.154	6830.102	3424.239	3045.170	1970.799	2409.706	2195.947
X603142331F1	1028.9642	930.9051	1525.1913	797.0426	1149.0992	1079.8293	1337.0494	799.5846	1506.6049	946.2166	1236.7747	1009.9858	792.6973	1042.5740	1218.9719	1170.2670	748.9770	1322.7794	1511.7968	1313.1097	1132.5667	1403.9536	1302.0328	1168.0904	1222.0492	1885.1723	1192.1592	1036.6541	1084.7738	1171.0103	1250.4276	1326.8498	839.3112	1127.3511	801.0913	1427.0986	1521.0288	967.2544	1471.7760
X603142334F1	13645.249	10663.033	12417.075	13814.189	10162.599	11391.013	8626.704	12082.675	11540.921	14323.909	10624.289	10440.037	15949.645	13244.321	10005.920	10635.508	15206.254	9361.847	10138.432	11846.586	10549.855	12526.001	11001.618	10495.232	10472.607	11865.023	9616.879	10094.169	10864.592	8622.470	10880.927	10560.236	12785.144	11919.974	10966.200	10670.919	10689.248	8631.731	11506.424
X603142335F1	29678.75	32549.28	31524.24	31471.06	24590.85	28227.77	28109.40	30421.26	27228.49	31045.60	29443.21	24730.06	33176.01	31707.86	26579.37	28664.41	31654.16	30240.25	25718.01	24215.00	27921.06	27954.20	24967.69	31906.73	31846.18	27269.89	26455.91	30382.70	25138.30	25441.88	28252.97	26807.20	33018.92	31045.60	23582.23	26168.31	26579.37	28688.44	27258.38
X603142336F1	356.0614	1077.7334	1617.2655	982.0259	830.8755	1681.1826	824.3138	875.5884	629.4295	680.5196	2046.8842	804.2796	744.6120	201.5273	796.4663	1070.9750	872.3241	953.3864	636.8114	717.9989	719.4524	625.4501	1226.6825	1396.0168	801.8902	781.3111	806.2197	958.6529	508.9532	584.9963	1088.0005	411.9287	670.4840	248.0561	750.0400	948.3545	665.7182	557.6755	575.4017
X603142338F1	1657.3143	2505.4522	2954.6322	2009.1843	1703.1740	2163.1444	1906.8203	2017.0053	2052.0391	1565.5840	2242.9796	2227.9680	2506.5666	400.6886	2208.3250	2241.8091	1883.8506	2365.0039	2362.2470	2165.8109	1962.3172	2668.1445	2218.6923	1867.7965	2164.0806	2276.9243	1974.9445	1719.0117	2473.6131	2155.0709	1939.0360	2746.6790	2368.0827	1845.3545	1887.4694	2463.1050	2188.3096	1963.9786	2080.5211
X603142339F1	2727.940	1638.953	1858.972	2649.545	1380.214	1929.543	1461.523	2257.138	1350.951	2424.593	2087.158	1469.360	1857.156	1131.709	1580.897	2002.599	2582.779	2095.252	2219.527	1189.777	1317.916	2046.824	1560.165	2012.075	1496.375	1881.175	1566.300	1073.277	1689.263	1178.929	2021.947	2168.042	2320.732	2368.886	1956.173	1724.346	1327.917	1402.373	1351.037
X603142340F1	1018.6679	1132.2483	1467.9458	928.5828	1440.4580	1849.7441	1066.6484	793.6238	1693.4855	1093.7432	1007.3313	1314.6987	750.4526	852.9368	1411.3738	1568.4481	657.3171	1612.1678	1751.3349	1406.5084	1721.8357	1718.2315	1750.6947	1096.4516	1194.5234	1702.0134	1627.4729	1181.1432	1421.7853	945.5911	1408.1660	1465.1117	453.0153	1002.4316	1459.7016	1503.3824	1585.0801	1202.7143	1188.4186
X603142341F1	10640.989	16027.595	16275.746	10192.071	11128.932	13344.511	14585.477	11162.262	11576.428	11096.210	12990.397	11839.719	10390.512	14396.755	12153.597	14905.124	9842.046	16076.314	12378.047	10879.971	9680.960	12228.447	14337.636	14931.575	12113.705	13359.050	12456.398	13017.556	13202.635	9921.103	13953.413	15951.678	10369.705	12029.374	10278.145	12024.773	14720.061	11648.108	13121.907
X603142342F1	1720.97757	370.01462	451.37827	851.35229	259.00174	334.73895	330.42977	434.57211	97.78872	1282.66334	377.66617	164.74541	590.72664	1203.77510	208.12481	278.39477	1431.15379	246.78309	307.45920	247.50681	383.63465	167.47296	256.13954	467.84967	244.52323	255.38052	353.00637	295.41703	138.34991	155.51474	221.33894	103.73726	1147.27101	2423.51024	179.28770	153.06275	125.74338	124.15370	185.13753
X603142343F1	22230.32	26417.96	26789.90	23930.91	19157.59	25487.00	24165.59	23448.57	20415.49	23631.43	21190.98	20392.27	24869.17	23904.05	19881.09	26629.04	23648.83	25489.97	24914.28	23868.86	18239.93	21343.84	22504.13	23988.40	24826.42	26952.32	24437.24	24727.99	17872.55	16802.39	25322.74	23783.56	25108.14	22250.05	24341.33	20413.11	20911.17	18452.86	22002.76
X603142344F1	5044.786	4517.796	5737.775	4804.387	3986.345	5140.040	3857.660	5012.853	5252.876	4993.572	4729.751	4598.651	5960.367	4137.139	4279.541	4793.948	5379.388	4750.724	4980.337	4393.770	5032.588	4677.643	4943.871	4139.023	5187.366	5590.547	4265.508	4408.841	4291.245	4054.271	4900.285	5334.637	5153.102	4998.089	4021.197	4438.915	3934.363	3575.460	5688.945
X603142345F1	8586.684	5423.103	6086.135	9180.299	6137.586	5660.326	4619.641	9043.589	4447.667	10600.327	5720.514	5675.368	10167.863	7654.569	7121.580	5470.877	8724.496	7609.805	11961.431	6034.913	4764.980	5574.231	5087.178	4805.472	5580.141	5695.604	6644.063	5231.528	5022.339	5407.584	5104.920	6504.471	10269.130	7304.550	9239.433	5356.748	7304.550	5911.145	5814.250
X603142346F1	11899.40	12907.37	15339.32	12037.89	12736.43	12144.00	13039.00	13649.25	18289.56	12391.31	12907.47	14081.08	15468.27	11611.87	12538.98	12495.82	15263.01	12272.44	13366.40	14974.25	16289.22	18364.65	12813.91	10266.99	14752.50	16337.92	13429.70	14262.94	15820.24	13970.40	12479.75	14158.11	13130.54	12463.34	10660.01	11800.06	11319.56	10136.88	14814.29
X603142347F1	490.0234	1735.0405	720.7647	557.1008	555.5956	508.4524	463.9005	671.8081	3517.9179	645.8535	370.9728	558.3722	666.7615	147.8243	548.5431	526.7979	793.5020	442.9306	844.5981	802.0690	696.9267	1067.7948	580.4512	319.2073	1276.2602	834.4988	582.4553	565.8310	567.4330	3327.8922	667.0285	719.6119	449.9278	262.0727	812.9735	529.8542	722.2620	498.8486	732.6859
X603142348F1	4843.871	4909.565	6556.578	4935.124	5040.674	4989.696	4617.799	6128.239	6999.102	4917.888	6895.516	4958.512	7841.895	6160.857	3937.128	4612.136	5280.318	4366.335	5170.763	5558.612	4667.499	6225.219	5627.858	4761.844	6358.421	6096.974	4546.563	6441.316	5124.413	5116.892	4429.160	5637.869	5848.759	4733.027	4746.406	5291.440	5373.107	3809.070	6278.004
X603142349F1	1004.2976	725.2983	728.6897	585.9436	424.0230	579.1329	1285.4455	1035.4452	475.3926	1196.5775	550.8485	454.2784	803.8259	1257.9694	428.2549	471.2065	875.7254	604.4770	676.2122	524.6029	458.8746	552.4157	629.3355	962.0308	419.0154	561.2904	571.1518	386.5377	445.4672	444.4186	342.2531	357.3561	1008.7372	889.1041	458.3308	341.3125	497.2234	386.0675	337.0725
X603142350F1	378.5999	467.9916	745.9251	660.2467	741.7976	582.0413	345.1248	616.6319	709.8727	381.0510	598.5620	618.7620	1062.5858	654.5108	612.5703	696.8820	509.2739	485.9540	566.1068	784.4069	557.2279	749.0683	677.9312	373.1678	662.6986	723.4144	485.2456	583.8710	514.7849	417.2765	625.3343	586.6217	396.7317	344.9504	676.1116	658.7303	698.6286	634.9976	927.9989
X603142351F1	2027.045	2343.802	2916.693	2534.255	2296.101	2633.965	1938.717	2621.159	2263.759	1993.033	1742.536	2404.954	2957.587	2024.876	2274.163	2117.435	2546.666	2365.392	2373.484	2401.461	2581.877	2344.544	2714.718	2136.625	2558.467	2765.408	2089.999	2319.858	2291.249	2205.093	2279.871	2456.044	2585.473	1644.745	2351.893	2506.691	2328.850	2188.855	2832.985
X603142352F1	79.86098	171.08852	229.75263	84.43599	118.59848	214.37438	180.49107	103.74225	97.67114	89.45744	239.61463	143.08304	62.45480	98.65002	136.10996	135.43972	117.72605	149.38396	154.41845	130.34319	109.26836	169.24160	106.89077	277.81762	114.28006	87.46544	126.99507	155.79272	171.80154	111.30583	106.81887	139.95606	124.12745	92.19782	113.68444	145.74109	155.81518	139.85195	138.02462
X603142353F1	365.0987	448.7129	659.0462	325.3723	695.4365	578.9170	384.3530	277.5803	714.7342	262.0540	353.3925	606.5099	327.9719	331.3156	507.1959	624.3582	173.1109	460.0116	638.9899	795.1140	606.1409	651.8483	882.7372	413.2642	553.0160	591.5107	525.3054	563.7204	484.1994	518.5713	549.7552	556.6919	175.6873	255.8615	686.0490	618.3520	692.4125	584.6860	675.0716
X603142354F1	50.49290	33.04490	38.68403	37.49573	46.99559	37.75401	30.30267	26.68405	44.68743	34.41273	31.44403	50.84187	22.88476	36.33607	36.30369	35.53687	36.75046	35.88889	36.56677	46.00681	39.99791	59.31241	49.97480	37.77102	35.95800	41.83926	33.42933	40.62795	52.23064	35.51559	35.54444	34.79257	29.24973	39.39661	32.28693	41.22302	46.97372	50.49214	37.90033
X603142355F1	3219.095	3221.749	2534.200	3111.609	2226.155	2876.450	3074.541	4096.877	2601.267	2858.031	2823.387	2535.346	3450.351	2324.919	3946.383	2987.368	3527.581	3447.528	3678.097	2072.195	3256.740	3030.240	1899.956	3430.919	2669.979	3036.989	3530.810	3009.133	2823.137	2792.868	3276.224	3069.461	3567.948	3363.479	3175.032	2567.537	2745.400	3072.170	2315.491
X603142356F1	346.1821	393.5340	661.3026	568.6048	676.4142	519.2832	289.4026	550.4364	430.3594	371.3951	354.0606	531.1999	517.4761	561.6145	537.2671	346.3742	274.0196	397.9450	365.8936	754.7179	369.4223	545.6062	544.7136	424.6559	661.0527	558.5148	489.1094	562.2714	510.8249	583.0674	546.4059	535.8000	293.2047	300.2481	576.8150	510.2995	451.7843	717.0293	598.4687
X603142357F1	4110.180	3651.724	3961.205	3763.584	3406.448	3861.610	3005.071	4036.283	3871.373	3758.513	3987.705	3660.115	4213.544	3482.375	2956.942	3391.790	4385.180	4125.923	3591.021	3532.948	3760.879	3781.388	3098.747	3904.543	3886.691	4199.740	3682.479	3325.955	2583.474	3538.583	3262.327	2906.948	4475.157	4189.738	3600.407	3407.845	3343.763	3441.227	3458.708
X603142358F1	5323.993	5735.107	3837.499	4560.110	2312.171	3263.437	2695.104	6837.521	2634.456	2504.897	1831.987	2383.351	7092.825	4786.411	2735.255	3403.535	6798.775	3173.345	4821.513	4724.769	2878.854	6315.516	3940.342	4136.305	5405.267	5696.056	5046.482	3332.171	3576.157	4477.739	2007.537	4314.506	5867.038	9052.851	2040.571	2011.459	3480.794	2868.191	5289.897
X603142359F1	44.23377	92.18452	72.58472	38.84381	72.99828	87.05309	75.54110	39.73420	96.88318	31.98066	79.14212	85.27661	58.97052	28.43268	102.28718	114.42720	36.05810	112.39195	107.59261	133.84393	97.42138	94.52211	83.84539	78.62613	79.68060	75.77083	92.21143	72.90156	75.15510	77.97455	107.39720	114.44929	21.60047	19.92066	74.23919	69.84393	68.34507	75.10023	103.40097
X603142360F1	3815.443	3956.381	5688.550	4407.591	4143.061	3874.989	3248.864	4147.254	4411.300	4115.852	5528.263	4294.144	5511.027	3361.642	3947.173	3019.948	3574.485	3740.124	2298.175	2929.378	3278.482	3191.301	4467.791	4916.384	4897.487	4352.287	2920.161	4261.126	2963.077	3483.090	3405.306	4218.166	3841.877	4395.522	1862.041	3495.220	2724.066	3050.953	3460.349
X603142361F1	3200.1306	1098.7207	2822.7547	2726.1762	720.4419	1709.4077	1882.3685	4836.4709	734.1556	3225.0718	2177.4792	1098.3551	4626.4573	3672.5497	673.8461	968.6989	2846.0839	1259.2619	1177.0601	1745.7715	930.6112	1219.8843	1005.4923	2142.8264	1639.1426	1388.8306	853.0734	2978.4035	932.4341	532.4729	978.6156	699.5950	4948.1678	2265.7948	745.8585	695.1568	1176.0419	640.2020	1198.1343
X603142362F1	3911.451	4907.467	6635.239	3962.533	6494.935	4993.596	5620.752	4888.582	7829.884	4231.744	5856.630	7766.012	5318.328	4480.036	5777.394	5630.958	3391.001	4751.453	5371.628	6353.918	7688.923	7922.163	6007.286	4559.778	6961.074	7628.915	7148.807	7184.958	6556.124	6604.415	5389.639	6065.591	3577.834	3125.455	5162.082	6574.361	7969.695	5782.617	6545.438
X603142363F1	104.78263	360.95366	624.93672	373.31111	289.62549	380.31389	275.89049	476.94376	326.48081	110.81963	347.71257	379.64959	477.58035	29.57024	326.75752	407.39645	233.32412	410.91337	285.14766	352.16028	339.72036	369.06953	368.72943	270.86668	490.99278	506.46982	367.20544	408.75208	341.79996	293.24155	475.50878	402.34545	163.82087	29.98072	398.95617	324.29959	328.81736	291.44795	406.06484
X603142364F1	1116.7514	1700.6726	1292.1167	1273.9110	1391.9647	1787.5362	2408.3622	1192.3938	1301.0062	1416.2734	1829.2756	1739.9047	557.0787	694.0520	1444.3134	1879.0341	1357.1308	2026.8894	1511.0075	1282.5996	1697.3963	1181.2258	1982.6612	2348.0946	1523.4722	1717.5479	2023.2769	1368.2188	1413.1887	1655.6706	1809.2527	1053.2678	1044.2701	1273.2264	1287.9478	1864.5372	1374.8986	1410.4494	924.5721
X603142365F1	1558.8140	1076.3449	1368.4328	1261.9633	923.5931	884.0104	881.9349	1403.1395	4896.3552	1383.5701	692.7067	1790.1969	1492.7176	548.8205	1299.6654	678.8344	1314.6681	1003.8446	1477.7911	924.1518	6201.9472	1516.9741	1321.2152	726.3903	1106.5590	1515.6779	1149.8180	994.5568	1478.0534	2631.7677	953.6247	1341.5559	1934.9427	1696.4170	699.5863	1158.9630	1377.4532	916.4010	1080.1041
X603142366F1	61.89481	89.95661	71.23635	63.74753	66.26588	81.16414	82.04556	54.47131	1095.99283	22.59652	39.97495	49.69906	59.94883	26.43215	81.82480	86.13490	88.23625	121.13912	120.74703	82.76450	401.64086	90.56829	28.35247	28.73314	142.65059	506.90026	44.14237	110.12082	83.76090	717.44474	38.06310	68.27572	76.36678	49.54048	51.70508	89.73419	34.73851	41.83060	122.96296
X603142367F1	1274.6366	1083.3204	1725.8224	1153.8734	1600.3828	1139.3074	1053.8819	1219.1035	2022.0006	1293.6849	966.8059	1416.8430	1378.8037	1517.7966	1513.0225	1301.9514	1022.2179	1193.2268	1356.1918	1884.3145	1679.3225	1857.2656	1573.3893	830.2581	1562.3138	1506.3184	1161.2198	1654.3149	1675.1704	1359.6235	1108.8444	1665.2268	987.7315	1486.0930	1322.2674	1599.8583	1956.5513	1502.0412	1748.6808
X603142368F1	615.7302	780.6317	938.7234	1781.1286	1602.5327	902.9559	570.8647	1052.3029	4242.2556	185.2490	1321.8955	437.0179	2263.7542	1114.0350	1026.6379	1282.5070	779.9704	822.8950	1055.4403	1057.6079	1870.3041	1111.1051	1109.2095	689.4265	1756.9502	662.8770	595.6399	980.8464	610.9684	1827.5747	510.8292	1407.4771	325.8347	625.4310	2280.3285	1569.4099	980.9710	1530.9606	2321.4216
X603142369F1	42.46662	134.39072	123.70426	71.62327	71.91165	76.31112	60.96774	82.38501	129.07181	22.25647	63.49532	91.21248	122.25515	47.30127	68.16553	97.48128	32.41320	96.97568	105.26062	87.35795	118.50552	143.31596	91.19255	61.06409	147.57622	134.97841	89.60115	72.38994	107.39245	115.40749	113.11928	127.61333	29.73169	30.11061	86.45072	77.14440	90.72517	99.27899	87.85985
X603142370F1	3746.312	2947.032	4056.387	4523.684	2584.368	3549.193	2757.382	3376.171	2268.941	4221.317	2386.144	2459.041	4530.778	4037.581	2919.099	4092.201	3667.724	3283.879	2700.375	3302.239	2267.107	2719.915	3288.772	3347.922	2988.310	3174.654	2235.389	3229.671	2227.165	1387.372	4220.947	2835.250	3723.995	2861.270	2757.991	2995.968	2566.536	2570.080	3012.232
X603142371F1	204.04281	768.76156	1236.01270	429.50880	720.63019	1169.58750	1320.92762	527.17635	1195.17293	259.09275	1387.17943	808.54367	646.23624	61.09476	1091.66854	905.23690	340.02926	863.91721	915.07589	797.50637	1469.45406	1292.04755	914.26264	521.59004	976.07143	1131.33083	909.02315	779.43206	2209.93346	850.03132	920.42328	1064.61693	240.73158	139.97382	798.33003	943.96408	998.33050	1079.02033	1186.92759
X603142372F1	5351.842	5947.991	7220.198	6022.973	6229.306	7216.393	5187.470	6248.035	5947.977	6261.284	5455.887	5709.827	7290.730	7547.677	6154.832	6070.063	5643.295	4728.643	5422.519	6687.681	6316.502	5572.776	6281.654	5049.097	6327.518	6577.925	4915.541	6259.779	5370.169	5433.396	5802.776	5791.071	6156.387	4860.335	5940.817	5592.950	6409.239	5945.313	6669.673
X603142373F1	7130.525	8562.083	4795.941	4658.194	5797.092	7288.918	9442.236	5407.702	3950.238	5492.558	6558.803	7251.871	3385.631	3006.829	7037.925	7905.740	5359.835	9352.547	9229.114	5968.651	7470.257	7206.018	5898.791	7630.936	4842.846	7022.558	10307.515	4317.829	9247.216	8457.697	7596.565	8060.896	7126.041	7100.459	4961.585	7545.160	6931.638	8301.331	4227.707
X603142375F1	6349.362	5978.973	5729.637	6383.874	8995.068	5965.966	6070.960	6643.744	12886.181	8425.173	11482.162	9833.312	3833.253	5352.769	9099.331	6932.078	7175.947	6188.466	9813.946	6462.126	10725.715	9046.140	9609.042	7141.994	6333.826	10007.348	7476.741	6439.290	7801.949	9074.881	6513.917	9474.016	5599.655	4840.725	7589.457	4854.601	7757.712	8090.983	7275.995
X603142376F1	13427.87	15008.10	16025.93	13156.10	17248.26	14945.74	14041.14	11218.38	16589.85	14760.91	13841.40	13872.49	14521.04	17681.05	14610.09	17140.61	12101.41	14942.90	15619.51	16748.06	16592.87	14401.72	15896.12	11770.50	17884.66	14293.46	14500.94	17610.31	12868.28	12978.12	16324.29	14512.43	10775.21	11373.19	18343.45	17141.79	14943.31	16033.92	18028.56
X603142377F1	66.237698	680.099478	601.803091	74.503000	163.727929	422.908081	268.959824	103.284722	198.403976	-5.808779	355.616620	237.943980	21.558960	-11.791748	199.450232	384.127294	9.591657	241.693779	344.381223	216.879974	278.963205	315.313707	400.581198	697.637152	409.760426	481.480127	249.898307	217.249570	244.845760	321.848964	175.301404	162.575786	-9.084034	25.595489	89.872392	94.741223	255.240431	207.155060	468.003024
X603142378F1	6805.437	12966.481	13958.542	6359.307	12061.068	13926.260	12417.064	6009.228	11605.833	6510.884	12560.130	11272.781	6796.894	8301.611	11301.185	11546.237	4249.559	12987.827	10971.717	12061.460	11480.750	12239.752	12006.148	11191.336	11630.787	10981.328	11124.870	11713.739	14867.483	12469.250	11528.815	14403.800	4969.899	4751.046	11842.424	13602.294	15292.990	13663.904	13099.656
X603142379F1	5298.728	6492.983	4967.231	5605.508	6154.589	6100.446	6747.479	6297.518	8615.743	5457.462	5194.919	7247.157	4996.109	6931.163	5691.099	6709.913	6395.355	6214.580	6111.658	6996.581	7688.893	5330.769	6020.286	7023.931	8137.737	6403.601	7312.939	8054.677	5629.538	8135.220	6578.390	5247.889	5059.186	4634.031	6639.630	6002.361	6773.211	6643.058	6705.557
X603142380F1	18433.00	16240.40	16922.16	19200.93	15589.32	16204.03	15719.42	17821.71	15509.44	17441.73	14830.99	16933.91	18980.57	18295.29	14269.83	17241.16	18681.24	16069.81	16480.43	15715.35	17666.16	13840.45	14274.05	17543.15	18190.80	15964.76	16069.81	17983.62	14374.05	15810.00	17977.18	15414.98	18313.54	18229.53	17538.36	14837.98	12121.19	13737.88	15583.04
X603142381F1	13245.56	17283.59	17413.99	12786.13	15136.62	17187.20	17257.58	12834.39	18155.19	11494.06	17251.63	16481.91	13560.70	10328.14	18238.93	14680.79	10688.82	16374.77	13130.71	13304.05	15709.29	17309.16	17380.49	16731.46	16379.36	15678.77	14550.97	13901.36	16055.56	17124.01	13779.47	16848.60	13276.65	11758.71	12883.06	16890.17	14375.16	14391.73	15231.81
X603142382F1	24792.47	25811.77	24748.35	20066.64	26697.44	23776.49	24024.53	19246.29	24716.88	24316.80	21152.72	24044.78	19268.48	26234.94	24616.26	25109.57	24879.95	25311.27	23736.24	25167.58	30481.00	20202.73	22996.89	21622.12	27620.36	23463.57	22580.14	26001.44	23549.54	24658.05	26175.04	20609.38	16922.37	18160.15	25143.63	26068.27	24954.55	24599.28	25250.13
X603142383F1	48.44930	113.21716	206.83189	107.98715	192.07645	130.54487	99.36633	91.21491	317.87704	21.63112	107.64425	225.17256	55.36888	48.67521	140.77019	135.98896	35.04261	128.91307	136.76821	184.18092	155.44136	209.20601	178.40673	73.26397	233.09183	227.30620	102.31466	177.91488	189.78158	137.88342	157.63161	238.19269	29.97974	10.73854	156.40035	187.36663	212.32542	191.73179	163.13081
X603142384F1	625.7528	901.9510	739.9535	1151.6437	2772.2475	799.3371	633.9392	615.9108	955.6352	977.4591	343.3618	124.1325	1652.0773	301.1801	356.2970	1102.1417	136.7913	362.1401	469.1447	217.3035	457.1998	710.2451	320.5490	211.0174	306.4182	4857.9829	627.3903	NA	170.8176	689.7495	130.9780	274.3504	175.1842	4732.8682	471.9595	137.2512	154.1294	424.7688	265.0674
X603142385F1	14610.400	21882.320	23259.087	11017.646	30433.703	23391.427	29337.209	11329.731	26938.243	14672.468	21522.383	22568.824	7654.934	16903.464	25002.450	25854.249	11858.264	24909.899	25533.824	29048.212	31716.420	20842.057	23826.013	19303.431	30687.165	22157.987	25256.672	33477.585	25992.983	24720.737	22881.866	20768.978	6972.382	6055.679	28894.755	23853.350	27176.118	28853.507	29325.743
X603142386F1	126.79122	233.75691	398.64616	57.62589	61.10982	231.17874	41.49361	66.69115	73.67677	16.03573	74.61276	62.08804	55.74133	52.40460	64.11730	89.25542	387.38475	103.75195	110.94445	381.60239	239.26109	364.72923	48.69146	159.66308	342.90612	107.60463	270.12462	50.71455	66.30661	80.22005	74.99369	329.89728	215.62672	14.70406	344.17898	61.96610	96.36595	69.66373	80.04436
X603142387F1	1091.9688	1077.0460	3363.4939	755.0897	1108.8515	1005.1524	2378.1079	1617.1327	2812.4921	880.1563	3108.0332	1274.8510	1749.6586	3055.4057	1633.1337	814.6372	662.2951	762.5293	1027.9798	3576.3089	3475.8000	1702.6187	1455.5419	1154.5924	2869.5578	1424.5029	970.2601	5099.0881	2303.3164	1622.2804	1529.2826	1108.0133	740.9092	162.3240	913.8791	1169.0686	2656.8449	1452.3535	2597.0999
X603142388F1	594.73690	170.73697	199.27134	273.11385	170.01202	197.87221	145.43374	190.57317	NA	550.34496	189.00387	84.55422	221.54451	772.14760	53.35379	64.89982	354.10444	93.86645	232.69222	159.47737	1319.09668	167.02360	178.12794	108.92243	276.42130	444.90634	187.72096	184.35227	177.88573	473.51802	168.35983	277.92001	377.57904	856.50698	138.92326	114.98096	100.82508	222.31370	253.53867
X603142390F1	4993.985	8510.386	7909.704	4301.169	5381.116	7652.628	7132.876	5154.422	5570.526	5022.992	7665.228	5050.004	5391.964	4302.468	5470.346	5522.687	4310.265	6690.302	9504.892	5223.078	6199.003	8679.784	6206.383	9088.836	5424.625	8362.475	6660.989	5880.517	4938.299	4775.548	5692.324	5620.823	5213.107	4540.772	6623.315	4879.728	5009.526	5709.136	5853.844
X603142392F1	2352.8018	1192.6523	1180.7675	2147.8859	1004.1954	1062.6764	1144.9864	1655.3678	938.5107	2303.9067	832.0054	1143.8862	2017.0279	1131.6535	890.3972	914.2233	2385.8887	1174.6068	1105.9992	964.1290	676.9619	1366.5427	1129.3847	1229.0078	1142.2816	1328.3867	951.8142	861.0369	1021.6766	1028.7468	927.0952	1352.6087	1609.4245	2167.4722	1176.9966	983.6616	1101.8294	1259.6931	1090.1234
X603142393F1	1289.0045	1340.0967	2161.5216	1770.2320	1160.9600	1650.6643	1497.0396	1838.7396	1112.6645	1722.8113	1819.0727	1342.5823	1856.4771	611.7146	1245.4680	1762.9993	1930.9290	1720.8012	1247.7568	1312.8941	1648.9919	815.3486	1895.6935	1462.2704	1616.6523	1583.9919	1324.0325	1769.1420	1029.2856	1176.5060	1683.5372	775.5547	1545.8780	1217.6148	1205.5751	1479.0978	823.3150	1044.7172	1169.5462
X603142394F1	368.14363	59.08890	79.35056	69.57104	78.41827	77.85793	63.67991	163.59453	54.58964	327.98982	71.48057	35.99843	116.33925	141.67959	75.31260	58.90684	201.18870	58.56618	70.00855	98.91545	70.00058	66.54634	54.61274	87.53412	64.29112	52.03617	111.33904	72.24839	45.34525	35.79052	62.40473	36.95644	179.34692	342.71464	102.48346	43.09767	30.85292	32.17582	64.18744
X603142395F1	15.528712	28.985301	17.067051	14.288686	17.076080	15.140600	15.532732	16.674354	249.615799	6.645630	7.689159	13.013669	9.256052	11.661654	8.068395	10.577436	6.531790	8.163033	29.407928	54.875743	263.626741	8.825839	9.264624	25.139518	148.785323	25.417716	7.831115	99.765420	24.524945	121.894972	21.585920	9.211476	8.498265	7.911808	18.275546	8.328306	16.416853	16.337760	71.801366
X603142396F1	5966.543	6059.465	7105.557	6147.139	5917.435	5929.842	5561.494	6227.733	8502.796	5477.014	8800.898	6634.291	6835.491	7179.751	5647.961	5932.277	5883.105	5606.792	6181.667	6319.607	6754.470	5671.348	5716.669	6206.328	8213.461	6641.817	5405.317	7480.514	5416.322	6335.390	5788.406	6733.495	6050.105	5870.211	6271.865	6265.732	5415.752	5783.865	6113.014
X603142401F1	405.3566	533.5670	670.1404	711.1398	553.4525	597.0127	347.1270	735.4160	432.5177	506.6194	531.1781	587.6503	950.3069	336.7892	469.6297	695.0938	672.1481	665.5256	594.9011	579.1838	643.1083	468.7876	587.4973	439.4474	744.3143	663.3907	549.0231	629.2526	461.7100	372.7819	677.1061	504.7035	403.9111	221.3183	650.3110	743.2421	483.1597	473.1389	493.3574
X603142402F1	29580.70	28103.90	27795.52	27968.46	31044.31	28842.51	21815.39	28400.93	30959.76	28492.54	25138.12	28179.45	32771.33	30484.72	27069.64	28771.81	27079.58	26482.96	28514.88	31935.09	30080.26	29338.94	27632.02	25618.22	30756.82	29484.55	27410.45	30615.52	27213.05	27714.72	27844.47	29934.99	28100.92	25747.93	32934.43	29626.61	29047.96	30963.09	31936.65
X603142403F1	32.24862	50.93387	72.83739	33.89441	53.88632	88.48708	72.33378	31.80363	89.69415	38.31813	62.41580	78.57814	30.07282	24.16466	74.80570	43.34717	25.40957	47.29465	57.23261	75.47278	51.90486	119.21473	101.85240	82.91447	39.52337	58.40381	51.94275	83.39336	118.61305	84.65797	49.12680	104.38052	17.02009	21.71401	35.35119	109.25689	93.87532	103.07703	73.88185
X603142404F1	4729.805	5132.772	5733.984	4444.568	5434.966	5411.240	4712.279	4647.001	5941.142	4839.606	6798.275	5137.766	5265.523	5704.030	4288.230	5072.125	4991.998	5193.534	5266.560	5794.701	5443.852	4588.679	5519.018	5652.437	5860.849	5563.246	4829.380	5773.335	4528.116	5038.760	5001.537	4306.960	4070.602	4509.131	5549.381	5308.210	4901.600	4625.348	5570.444
X603142405F1	372.2718	492.3531	636.8711	908.4820	849.3683	504.6804	458.2560	589.4696	475.6732	419.1548	419.1847	520.1309	729.9971	326.8180	563.6437	803.3054	660.8424	430.4047	477.2172	574.1580	514.7203	567.3169	827.4500	345.4827	374.9164	662.3101	518.8500	426.6973	551.6863	571.7065	634.8024	693.6593	383.3785	195.1877	705.8386	570.4464	504.2125	609.8262	851.3366
X603142406F1	161.2064	267.6167	264.0540	223.6796	336.9351	167.5027	198.2023	225.8527	256.2238	255.1155	278.3502	251.8683	195.3482	122.1447	216.0693	279.5747	218.5539	327.1386	321.6919	387.1995	226.7390	287.4182	345.7156	255.6041	285.3509	337.6514	312.9409	251.5565	249.6388	232.0000	304.4946	255.7863	167.4949	119.7470	311.5184	324.0616	341.1284	245.7238	260.7499
X603142407F1	36.17520	64.52584	41.46791	48.18342	101.17525	35.72827	24.75495	46.58205	52.25845	38.41007	131.23555	38.06619	56.83620	29.12801	69.92228	79.24078	34.40424	67.23822	100.29900	53.27481	97.94239	52.00630	44.78774	21.25484	59.94588	57.13886	37.20618	34.98109	60.58019	69.26846	43.31653	97.54365	47.39773	43.88960	114.13288	26.87146	49.62580	64.69006	90.16619
X603142408F1	4409.281	5261.954	6165.910	5032.255	6176.151	5392.628	4531.346	4376.826	7107.974	4041.134	4973.178	5255.434	5493.681	4833.215	5661.864	5494.062	4163.331	5654.573	6525.662	6670.702	5314.598	5454.065	5659.040	4280.973	6634.112	6278.292	5609.820	5711.046	6188.024	5430.770	4997.990	6741.374	3646.125	3281.640	5504.814	5259.049	5041.639	5765.188	6768.899
X603142409F1	10.855796	10.543362	11.736997	8.598137	10.463810	13.719330	9.381583	8.728449	11.187745	8.669707	10.959561	12.423087	8.423173	11.162735	10.601291	11.658265	7.724571	14.272766	8.906197	10.737936	11.595734	11.198510	9.579478	11.919766	11.249458	12.470754	10.107503	11.450068	8.721475	10.126365	8.976928	12.216941	10.485865	11.131469	15.336095	10.897338	10.742754	11.261861	12.316272
X603142410F1	1739.0630	2241.1217	3892.5068	2124.9110	2517.3276	2854.5787	2493.4812	2031.6686	1750.7029	987.5933	2031.2194	2548.1875	2086.1028	1479.0512	2169.0395	2914.9777	2040.5306	2385.6745	1951.1256	2390.7650	2345.5083	3719.2641	2626.3451	2240.9755	3310.7303	2982.2113	2410.9086	1945.2180	2330.8375	2769.8906	2197.7230	2907.0320	1883.8608	1517.9188	1495.2364	2196.3872	2554.5649	2550.2826	3466.3881
X603142411F1	476.50791	536.47932	223.59030	211.10606	264.77333	208.77013	283.42379	287.58799	323.87360	115.04372	54.35326	291.08027	40.58362	1842.11686	73.75754	74.14696	41.94356	65.47949	1077.29657	694.05670	NA	47.16012	72.63673	248.48510	1431.70721	64.73466	78.37879	788.83028	575.81938	402.21006	285.99543	113.29960	32.11062	41.32749	132.37941	94.57643	128.92107	114.61259	756.96525
X603142412F1	28888.34	31238.87	33708.66	28177.04	24975.48	32770.12	32395.88	25754.88	27806.78	31236.62	35811.99	33465.90	23864.50	29875.18	26487.04	27203.40	27156.66	30719.05	23200.02	22709.65	31097.62	24313.57	26552.04	30795.18	26413.19	31710.94	29063.24	27671.92	23771.20	30641.05	28065.07	31029.81	26043.26	26588.80	30548.20	24475.35	28235.20	29432.00	28969.19
X603142413F1	3193.882	4318.518	5319.221	2220.640	4656.275	3993.617	5142.422	2134.084	5029.717	2454.076	3597.991	6024.810	1676.806	2550.703	4000.257	4623.567	2165.202	6012.827	4153.471	4031.614	3819.745	5400.368	4664.076	3506.870	4219.236	4167.685	5383.153	3782.227	4570.134	5272.603	4509.786	5992.852	1933.515	2391.351	3889.085	6121.572	5860.292	4933.042	4386.334
X603142414F1	2953.357	3776.915	4496.691	3521.304	4557.586	4228.477	3552.035	3362.547	4641.914	3007.033	3765.997	4018.619	3116.285	4338.648	4052.059	3776.851	2843.786	4037.667	3570.719	4628.185	3631.568	3788.425	4296.661	3164.593	4470.710	3953.256	3492.088	4095.445	4748.669	4118.937	4039.186	4729.985	3286.089	3245.347	4478.474	4610.856	4689.300	4463.889	5275.543
X603142415F1	7559.954	9870.246	10817.907	8126.010	10084.585	12059.460	8539.898	7370.599	9224.567	8522.721	7922.266	8856.169	9279.445	7248.677	8758.965	10869.974	8456.417	9517.369	10007.656	9480.385	8701.154	9340.318	10371.433	8294.199	9128.756	8729.534	8805.831	7538.698	7252.710	7645.316	10786.750	10067.444	6110.727	6188.977	10540.944	9580.641	8979.793	9632.583	10758.874
X603142416F1	11375.514	10966.670	12354.862	11983.936	10032.123	9559.933	10299.317	11812.750	11576.479	11139.784	10621.488	9499.788	14010.080	9944.248	9995.701	10539.551	11666.486	10408.267	10930.087	10705.099	10631.482	11634.054	10050.910	10067.466	11930.869	10923.668	10034.710	10708.947	10336.511	9900.209	10468.137	11485.910	12169.238	11398.381	10120.016	9863.969	10919.710	10807.695	12779.384
X603142417F1	497.3597	777.1563	896.6030	933.1247	658.3396	751.5781	811.0321	883.2336	405.8754	643.9032	579.9018	603.7326	1016.8518	297.5076	954.3854	866.1123	768.9448	830.7154	648.0812	516.4396	636.6194	739.6923	628.5423	746.8640	655.1596	490.6329	705.3638	690.4893	766.4803	673.8053	839.4973	925.2750	610.7107	523.3603	596.0890	863.0259	840.8291	921.7931	502.9600
X603142418F1	375.7128	691.7034	1231.6668	599.7461	539.9004	682.5006	839.8386	993.4716	986.7152	473.1821	661.7556	801.9244	868.7251	326.9996	601.8054	660.2356	772.3403	990.4327	834.9108	792.5324	635.3662	994.4524	886.6615	456.8575	529.0356	989.3685	668.8283	475.4579	675.0991	416.4769	796.2025	802.8536	923.3744	539.7186	734.7780	782.6069	697.6489	430.9520	947.0498
X603142419F1	4386.929	3800.358	4930.465	6285.262	6311.134	4945.042	2407.947	3895.296	3988.253	2632.218	2062.621	3695.171	6086.818	4518.852	5477.415	4171.349	3353.776	3513.416	3970.734	5553.897	4796.233	5441.550	5217.436	3061.486	5288.179	3776.096	3645.263	4794.401	4303.139	4850.463	4045.200	5476.562	3486.703	3244.328	6768.155	5001.632	5014.336	5227.643	5932.895
X603142420F1	17230.21	26562.23	25449.76	17974.70	25059.90	26665.98	25077.42	14629.82	25400.89	16029.53	33775.78	23464.08	15251.77	19054.68	25714.45	24709.73	15125.58	26390.82	24356.87	23020.83	29315.70	27451.40	24243.20	24000.24	27391.96	23044.59	22409.04	24593.56	26940.66	25297.57	24210.74	27811.98	12350.49	13769.92	23791.06	24613.26	31546.14	26543.25	23486.17
X603142421F1	6276.742	6877.980	7696.352	6445.333	8004.752	6876.020	7037.773	6318.617	7857.132	5970.793	6473.045	7351.978	6107.009	6215.536	7662.736	7878.672	5703.555	7819.688	8357.163	7952.004	7350.953	7944.728	7045.912	6466.801	7523.530	7330.751	7588.086	8143.759	7172.320	7665.553	7955.362	8178.292	6026.437	6289.958	8366.768	7946.377	7294.657	7841.530	7123.534
X603142422F1	8403.301	10273.465	9826.938	11057.842	9497.055	8519.796	7733.177	11207.344	11997.489	8952.008	12401.915	9101.898	12241.097	10942.715	10075.016	10405.347	10248.219	7955.418	8658.986	10661.373	9777.602	12023.043	9804.959	7495.783	9998.247	10141.888	7545.132	10270.394	8816.370	9574.423	9853.031	9946.637	9949.154	9090.179	10578.202	9406.280	12279.667	9749.942	11957.053
X603142423F1	6356.854	4431.436	3872.969	6578.204	3913.820	4493.293	4287.331	6674.946	4832.205	6877.497	4912.539	4326.432	7128.011	4045.170	5134.187	5710.964	7698.083	4262.655	5748.605	5273.788	5038.031	6653.677	5098.281	3988.368	4643.760	3775.643	5226.891	4847.564	3831.110	3981.070	4250.629	4152.692	5996.217	6661.827	4441.519	4720.318	6066.803	4664.158	5501.592
X603142425F1	9058.776	7974.272	8458.325	9060.831	8861.629	8338.032	7733.337	8461.910	8308.837	8518.860	7078.737	7958.621	9415.288	7664.933	7591.654	7600.285	8049.459	8618.238	8558.135	8418.058	7281.288	8396.546	8423.816	9622.172	8372.881	8424.948	8846.804	7480.191	7423.762	9013.775	7664.967	6967.415	9319.628	9277.905	8832.562	8840.228	8248.505	9109.444	8480.268
X603142426F1	4090.952	6452.250	7078.771	4322.139	3931.446	6008.273	7049.860	4492.824	3728.862	4900.174	7746.788	4854.086	3969.624	3236.221	3750.385	5116.178	3595.077	7206.059	3615.994	3515.580	3758.280	3450.300	5351.893	6706.602	4284.842	4794.949	4678.815	4503.144	3865.753	4600.608	5422.589	3690.874	3969.247	5735.709	4255.782	5238.272	3605.173	4140.083	3874.252
X603142427F1	408.0368	836.6383	483.5067	571.7678	508.2643	609.8687	490.5284	607.6945	253.3590	485.5421	416.0748	380.5333	1109.9940	259.4049	642.7408	703.5048	689.2901	808.3259	605.6304	379.4430	556.2761	483.4109	593.4784	581.0186	407.9078	511.2077	541.4606	377.0936	373.9349	308.2836	631.2898	402.8813	525.9105	551.8506	626.1247	375.3621	379.5539	425.4549	228.2092
X603142428F1	3317.896	4899.352	6111.552	2956.641	6310.372	5565.458	4659.780	2885.859	5761.242	2901.352	7954.540	5381.198	3778.287	5641.269	4020.092	5304.877	2156.067	4957.897	5194.478	6717.836	5592.281	4967.034	5820.761	4131.653	5933.729	4950.267	4173.088	5559.496	4752.165	4960.801	5000.576	4891.993	2450.543	2668.725	6127.690	6132.029	6065.104	5109.682	6223.664
X603142429F1	9593.705	10391.940	10854.244	9389.866	8888.799	10737.776	9611.004	10353.633	8287.626	8731.614	9866.916	10292.598	10867.253	10770.742	8534.036	9762.402	9155.115	10436.541	8494.811	9838.100	9388.261	9948.762	10407.928	9619.465	10177.442	9644.913	9629.818	9051.933	10159.661	11745.537	9514.376	10566.936	11195.665	11572.103	9075.117	11054.605	8364.645	9501.896	7961.203
X603142430F1	310.77026	327.57022	664.96137	580.40654	14172.45752	15468.65236	995.32952	2023.31241	498.33901	83.66986	189.79510	15167.78023	60.43004	1707.83771	364.63673	117.48578	341.02410	17315.01253	137.53528	14291.27505	399.49714	134.58581	422.97404	63.57098	2010.16416	418.34316	299.65268	85.13962	645.43378	31541.17490	16306.08234	12057.52544	817.65503	101.34768	14576.12648	167.74962	585.64529	405.04205	401.82341
X603142431F1	1110.4333	1582.6213	2653.3441	1260.2238	2631.3081	1706.6709	1672.6009	1085.2006	3699.3499	728.8821	1921.6206	2505.5162	998.9225	574.6697	2594.3138	1986.2890	448.0431	2158.9701	2643.1677	3256.9735	2450.0984	2591.1308	2444.1130	1042.4085	2364.4154	2968.2875	2104.8309	2382.2295	3351.8647	2899.0290	2107.0788	2543.2472	623.0780	510.1000	2577.6115	2467.2775	3087.9150	2624.1121	3295.0532
X603142432F1	21109.85	22475.58	21520.13	21291.54	26217.33	17789.25	21139.78	18458.75	22231.42	20114.45	17863.15	20397.02	19643.84	19015.96	27444.06	21526.39	18932.35	19449.94	21267.75	22609.40	23279.72	24424.49	20018.67	19107.41	24584.24	20637.88	20756.60	24140.59	22760.11	25772.75	20811.29	24028.47	17844.58	16424.54	24975.76	21874.00	22369.46	26765.59	23485.88
X603142433F1	25025.64	26788.15	25813.11	24398.31	21315.59	25200.38	27857.03	24897.36	20381.22	24294.11	26040.72	25895.48	26256.21	23102.37	23339.36	26394.05	21812.06	24730.62	25233.14	22101.32	22877.17	18669.76	27675.69	27400.60	22877.17	23894.21	22700.45	25418.92	22487.57	22515.24	22965.86	22426.82	25689.84	25770.18	23229.11	27396.07	24300.41	24149.14	25220.67
X603142434F1	8211.382	8030.846	9295.551	9619.527	6545.682	8155.704	7149.236	9428.613	5910.145	9015.252	9785.356	6508.175	11340.767	7882.379	6119.549	6680.012	9708.379	7534.228	6800.928	6261.599	6427.994	5064.639	7278.113	8072.253	6737.125	7857.954	6536.573	6842.984	5162.726	5624.521	6482.135	5420.908	10128.406	9611.070	6780.013	6481.800	5669.088	5769.282	6555.997
X603142435F1	5864.829	4309.852	5348.206	6416.734	3135.752	4285.924	5114.407	5930.818	2168.159	6480.429	4725.426	3518.717	5907.282	7935.075	2976.701	4024.062	6472.378	5148.289	2882.665	2815.036	3381.500	1865.110	4499.991	5408.687	3027.929	4065.660	3628.386	3882.134	2530.057	3085.475	4106.301	1926.691	5867.991	7023.665	3222.100	3722.833	2626.000	2898.059	3247.640
X603142436F1	11065.396	11812.463	11260.390	11223.654	9591.360	12621.269	11377.835	11815.908	9539.882	11075.834	11673.835	9760.229	12596.634	12336.801	9544.999	10591.739	12282.305	9051.817	9453.317	10605.354	11149.410	9211.783	10271.478	12278.541	11698.717	10602.261	9338.566	10718.074	10122.463	9835.820	11526.271	10211.904	13121.491	11676.466	9712.805	9619.581	8433.362	9276.140	10308.779
X603142437F1	13.07617	30.47185	27.08128	26.54233	20.50473	48.44339	18.72340	21.50912	31.98241	16.92173	20.09132	25.43773	19.64913	15.94651	17.44734	19.12216	15.23046	46.10547	29.16072	27.69788	21.70396	27.91320	33.29437	23.76937	39.21622	92.29457	15.67568	28.28224	25.69867	19.75077	30.73411	27.58939	17.34159	13.56817	47.78901	23.02688	34.51742	34.22661	39.79255
X603142438F1	134.40365	263.47666	159.46611	93.68662	220.47793	218.57287	247.58436	134.31917	NA	112.39334	193.91483	249.84218	78.58431	75.50698	276.15852	276.22712	131.99126	292.51266	396.88021	233.50564	NA	262.66235	244.99781	291.68740	181.54768	226.14130	282.38264	207.28063	306.85085	269.71397	204.43482	258.36894	81.96507	70.98855	178.48059	188.83339	206.07265	206.62649	188.91981
X603142439F1	2567.940	2602.706	2309.065	3283.391	3051.012	3711.365	1808.578	2675.859	2112.343	3404.562	3060.589	2632.745	4734.501	3181.150	2312.941	3304.670	3260.847	2663.647	3478.569	3130.798	2623.604	2622.907	2669.905	2288.617	3129.499	2954.300	2590.184	2954.395	2031.477	2076.045	3161.657	2819.655	3220.232	2862.329	3417.511	2352.527	2478.487	2360.819	2898.345
X603142440F1	1077.9212	754.4621	956.3120	1234.5646	668.9829	697.4531	525.6194	1688.2533	3218.0470	948.7389	662.7350	1278.5079	2337.7378	254.1860	901.9206	486.9160	963.2314	684.1829	803.7065	765.2679	3716.3850	1012.2427	947.5317	529.1579	822.3280	1093.2405	724.2059	721.0776	1195.3912	1905.0856	688.3675	867.0741	2452.4398	687.9865	586.0322	941.5819	905.2607	569.2251	801.8227
X603142442F1	18348.87	23192.28	23110.20	16250.03	23049.30	22661.91	25360.09	16073.39	20282.50	23100.65	22593.88	20593.03	16353.94	13217.47	19827.92	25465.83	20883.58	25678.94	24903.21	23502.38	22248.57	21448.10	23841.47	22751.05	22625.83	22547.48	22142.91	21125.60	21594.13	21010.42	22901.04	21615.47	15762.86	15389.02	23280.27	22236.70	19662.60	19031.15	18317.27
X603142443F1	156.77797	563.42297	129.68368	133.49963	141.34014	197.21798	157.65942	71.44951	92.33381	88.02248	61.46893	101.59668	93.13496	33.70031	140.28660	97.95435	167.76637	204.03577	466.19742	162.62253	NA	148.01444	885.44585	465.52753	142.62456	118.18122	118.56678	159.28214	121.99405	222.89141	329.74481	451.66025	35.58777	71.31978	178.34263	184.71010	127.22507	111.45705	155.83716
X603142444F1	17572.88	18937.89	21406.73	17157.32	16677.36	17012.65	18178.15	17584.08	20714.35	15663.59	16212.34	17085.70	15942.74	15592.08	19858.20	17947.03	17213.53	18416.69	19234.16	18850.46	19326.03	20488.82	16880.08	19406.02	18479.56	20104.26	17741.00	19030.35	19528.11	18274.57	18896.49	17677.36	17173.24	15334.65	19827.75	17316.58	16770.07	17654.04	18720.45
X603142445F1	5556.928	6238.162	7091.661	6366.807	5809.899	6025.929	5864.117	5703.614	7270.601	5856.127	6702.360	5610.857	6151.735	4970.598	6399.627	5649.648	6340.836	5596.758	6054.130	5869.245	5129.907	6815.174	6137.321	6335.813	4943.359	6132.046	5529.771	5311.431	5042.466	5452.264	5837.734	5576.017	6260.896	5600.960	7152.502	5903.267	6288.823	6734.407	7178.087
X603142446F1	2986.585	3051.007	5173.918	3812.920	4867.772	4203.507	3769.858	3353.307	5005.189	3001.865	3997.216	4007.245	4643.245	2837.240	4459.745	4546.126	3214.180	3982.286	3288.312	5245.347	4282.139	3892.947	5325.177	3798.702	4516.180	4973.785	3552.047	4330.264	3543.304	3374.833	4124.937	3435.917	2252.172	3081.811	3725.279	4672.476	3982.997	3629.037	4607.338
X603142447F1	4419.605	2752.971	3633.614	5348.533	3077.432	3988.241	2647.875	6224.784	3514.645	4570.307	2964.741	2908.460	8492.817	6562.324	3336.594	3022.165	6331.837	3051.950	3344.317	3539.106	3563.866	3216.274	3298.568	3221.951	3095.704	3615.413	2714.820	3566.980	2826.041	2537.012	2945.757	3248.970	6116.772	4879.149	3412.457	3214.726	3523.895	3009.939	3544.318
X603142448F1	6576.577	9900.103	12035.026	11224.448	9954.929	12251.650	9620.635	12283.215	10299.911	11596.877	13317.250	10990.859	14804.702	10472.587	8180.790	11113.612	10372.258	9020.858	9523.579	12992.818	10989.264	11596.936	11069.914	9391.174	11987.264	13524.840	9084.261	11099.092	8673.380	7351.593	11187.928	9330.649	11995.262	5899.890	11863.097	9366.158	12198.325	7279.496	10708.173
X603142449F1	283.2585	284.6690	588.7835	190.5798	552.9888	217.4648	404.5779	588.8818	1230.3820	277.9120	426.0695	579.6281	368.7077	395.8562	262.0011	353.2807	328.3657	245.8550	335.4827	549.7360	1575.7346	431.3172	301.0130	261.1498	438.5705	177.0552	255.2477	632.9067	348.1357	671.2511	301.9979	233.8775	115.4779	117.6610	510.0397	352.7834	284.6862	374.0295	870.5958
X603142451F1	2733.944	6438.990	7282.671	2271.377	7939.452	5963.704	6222.291	2452.001	8057.586	2075.961	8071.989	4991.917	1975.628	2618.174	5883.246	6782.129	1370.458	6532.296	7101.751	8056.935	6963.934	8112.737	7243.390	5151.613	8705.234	6748.227	6399.251	8391.407	7283.716	6458.269	6397.428	5427.868	1349.752	1206.618	7660.739	7829.645	8722.455	7126.928	8130.386
X603142452F1	4086.032	4613.696	5852.282	3717.510	6846.422	4638.689	5103.119	2946.927	7444.414	3586.907	5789.395	5923.055	3087.713	5172.652	6754.467	5258.232	2432.485	5780.824	6179.269	7770.646	5348.031	6012.200	6210.330	3812.054	5792.130	4936.826	5501.127	6343.000	6953.850	5180.995	5920.555	5918.422	2534.492	4059.916	7250.705	6182.242	9156.711	6529.685	6864.247
X603142453F1	20.45892	30.29435	24.72946	29.78332	20.15948	21.93390	32.85915	20.59926	51.98953	25.79873	20.25872	22.23603	33.50293	28.55131	21.08415	20.29442	31.71986	16.62641	33.85855	18.59459	30.96237	21.45862	22.10903	26.42400	25.47537	26.96211	18.56577	21.04976	26.95191	22.56260	24.34662	20.59146	48.54776	20.88530	18.85665	18.66562	24.31507	17.04998	22.81849
X603142454F1	230.3093	965.0839	560.9738	331.3825	602.4720	761.9653	496.7085	264.9213	550.9878	195.8625	389.7558	640.7852	237.8572	156.7626	574.7976	591.9010	171.8739	640.5379	653.1976	578.0634	415.1166	849.2628	700.9354	527.6906	600.3733	537.7747	1357.9993	476.7096	1314.7278	1129.1483	482.3807	537.4766	170.0428	241.8986	1089.4875	860.4252	844.3654	1243.7384	594.0468
X603142455F1	5158.808	6001.522	6851.778	5062.945	5671.217	6611.118	5533.318	5445.777	6191.390	4719.938	5334.218	5776.476	5919.748	4498.221	5481.546	5060.782	4756.249	6165.853	5600.464	5807.909	5772.887	5626.916	5670.096	6083.341	6390.334	6356.179	5830.724	5140.217	6636.997	6406.043	4799.870	5989.568	5505.192	5068.706	5671.849	6374.584	7125.062	5592.251	6260.046
X603142456F1	127.09469	137.73604	294.37278	226.81307	136.29529	214.29209	125.12775	197.65828	363.92549	137.28150	178.00608	131.69458	405.09500	199.15747	91.92740	230.18443	186.61135	150.52308	236.63580	183.66617	381.01790	182.38779	182.87181	245.32636	158.14499	272.83818	172.15934	163.43166	123.75116	127.66097	191.44102	107.14378	217.64649	249.75624	150.55786	109.59525	97.47848	86.79345	177.37976
X603142457F1	1959.680	3839.615	4998.238	1884.705	5540.824	4511.562	4400.380	1875.231	5398.620	1704.385	3190.962	4913.636	1931.576	1993.343	3507.808	4813.390	1259.947	4110.681	4929.397	4974.776	5084.584	5144.463	4425.345	3853.448	4887.845	4622.627	4930.215	4925.395	4800.996	4800.109	4529.926	4525.725	1083.304	1149.682	5337.061	5498.553	5242.195	4854.154	6225.510
X603142458F1	1721.437	2680.440	3176.417	1683.534	4555.467	3963.643	3746.285	2114.111	2801.540	2061.521	3554.552	3577.837	1716.027	1916.526	2311.612	4276.447	2249.472	3736.051	2383.234	3315.566	3016.568	2768.499	4325.997	2415.553	2558.740	3578.777	3728.546	2814.252	2596.397	2993.337	3443.814	2884.080	1407.544	1131.648	2864.315	3909.881	4483.846	3129.867	3990.399
X603142459F1	5353.435	5824.167	5776.734	6243.146	5070.073	5567.376	5332.935	5294.470	5464.685	4609.629	4801.429	5854.094	4472.836	4956.336	5840.906	6949.235	4855.027	6205.190	6101.843	6424.678	6351.123	6042.562	7414.577	6574.439	6025.439	5559.332	5429.740	5630.021	6780.216	5001.946	7289.590	6571.699	4800.833	5124.721	5889.318	6342.123	5032.490	5205.345	5367.191
X603142460F1	30158.85	33989.98	33905.13	30236.36	36590.18	33936.77	28800.46	29037.14	37372.15	29313.20	29907.44	33311.83	29619.09	30069.33	35079.74	33996.36	27250.23	30295.97	35590.83	36269.67	37083.43	36004.19	34410.79	31880.83	37813.94	34714.20	33247.74	37572.15	34157.74	32007.31	35075.76	35244.75	26299.72	27406.42	39063.74	33634.81	35577.78	36663.47	36656.46
X603142461F1	926.1563	937.8505	1154.3178	861.4708	1135.4717	1054.5478	1007.7637	669.6893	1542.5136	930.1981	1278.7142	1227.6980	996.9224	1150.2841	666.5804	804.8085	656.5095	964.6679	797.9478	1188.3522	1109.4203	1194.5578	1379.1484	1056.5810	1105.5361	1076.7288	1013.9763	1087.0927	831.8607	1306.0802	909.9986	796.3061	801.8734	1085.4734	891.6105	1568.1769	1267.7690	1028.5520	971.1225
X603142462F1	1664.1022	829.7726	600.0283	1738.4627	997.3641	1036.5980	593.6094	1668.2844	669.5004	1543.0054	959.1085	850.6045	1966.4163	1981.5163	851.4997	916.3956	1643.4983	828.0965	677.1817	1034.4263	1390.0894	475.5348	933.8754	924.0856	532.1724	816.7872	725.2436	765.8978	710.6353	808.6294	814.5433	736.5257	1916.7783	2264.6968	817.2012	812.1172	695.1478	627.4003	533.0368
X603142463F1	200.46884	87.32847	96.70360	154.64862	103.02473	142.90346	217.62827	206.94567	87.88683	215.28199	122.86058	114.26162	161.59773	62.47142	127.38171	99.70270	254.14919	106.67503	99.94274	86.23620	97.65601	121.86313	138.84287	135.45881	91.40826	107.42509	108.76575	128.22514	117.31845	106.72747	121.29321	109.19316	210.29401	266.26223	118.06648	147.59403	99.92387	94.93227	100.13982
X603142464F1	8364.496	8361.217	9713.168	8684.742	7695.262	8346.177	8411.097	9616.679	10584.984	7454.424	10764.686	8118.315	10175.072	9427.471	7745.867	7978.854	7699.886	8903.838	8756.032	8431.529	8640.452	9009.752	8942.694	9450.512	9314.331	8654.770	8151.884	9964.781	9318.541	9170.749	8462.321	9583.802	9482.473	10368.206	8226.859	9356.201	9493.661	9291.551	8151.884
X603142465F1	17765.72	26810.09	25262.89	16062.56	23500.20	25558.70	25045.12	15375.05	28028.18	16426.71	31650.09	24307.24	14794.08	17578.01	27449.97	26392.81	15611.57	26545.70	23836.68	27375.27	27561.84	30421.75	25023.78	22137.61	27484.23	23823.76	22773.25	23345.06	30480.60	27171.49	23820.92	27882.48	12089.29	14051.98	24593.83	26570.10	29421.11	27054.39	24227.61
X603142466F1	1256.9173	2629.2570	3865.9857	2334.6775	3280.5089	2323.3290	1917.4453	2366.8988	3933.2851	1383.2160	2134.7127	2514.9428	2637.6955	1272.0171	3440.2084	2568.8899	2081.2015	1962.3147	1923.9035	3258.7853	2746.8478	2893.9884	2834.2541	1541.7631	3517.1255	2810.5528	2282.9662	3310.7551	2785.1957	3202.4091	2587.1773	2847.7637	1506.3528	623.8164	3216.8692	2773.5566	3045.1821	3676.5755	4071.2941
X603142467F1	143.3750345	440.0098470	246.3040871	1258.2069484	1831.9462943	227.9634707	140.4113455	211.5306103	382.4112833	80.9445483	303.2397511	200.0199359	1414.3976000	1263.3054774	898.7955553	514.5289336	60.5390520	220.5080360	183.0382650	388.9003200	243.0512552	205.2710157	227.8475148	19.6902263	225.2340078	210.9740308	225.6461590	244.7341157	233.3526930	1275.6437803	363.2768070	629.4577677	337.1510593	-0.6711497	1902.0668057	517.6421822	362.2673509	1583.5024221	886.4133489
X603142468F1	12097.398	8816.494	22824.446	11536.767	5456.592	3492.291	3995.710	3234.655	24574.934	15623.438	18670.859	6457.826	9292.189	1555.941	31818.917	2593.198	15398.789	20823.511	30234.680	27271.890	1916.163	2432.034	7178.365	21488.455	1925.450	1659.031	20271.457	18707.490	2433.490	20430.518	26923.410	2008.407	1941.554	1799.940	1565.612	27065.910	3065.829	35234.638	5357.792
X603142469F1	419.2484	379.6786	652.4120	761.0755	417.8047	377.6928	322.5341	553.3611	797.6160	329.5887	746.6216	526.1758	1001.8275	320.9755	240.4996	433.1778	419.9986	436.6339	467.4212	545.5356	739.8937	529.6992	537.9069	428.1232	493.2052	585.5311	430.7701	406.3529	378.0532	302.8219	511.9193	540.0829	294.1568	463.1073	421.3470	514.2104	501.3993	491.0691	581.6533
X603142470F1	5834.395	7444.969	4328.403	5994.821	5480.782	4221.740	6344.254	5008.350	5743.487	5195.640	4372.645	3993.043	3672.860	3810.084	5715.193	4524.452	5509.607	5433.906	5624.794	5814.950	5514.203	6187.339	8634.347	6117.605	5988.921	5369.408	4799.130	4293.423	4818.593	4541.936	5702.757	7538.847	4261.226	6818.284	5266.188	5290.058	4424.018	4856.651	5627.646
X603142471F1	12179.652	12426.106	12452.830	13420.312	10302.537	11650.111	11348.147	13696.832	9711.906	12727.027	11255.294	10427.527	13090.462	11414.924	11587.371	11134.948	13833.981	10880.846	10744.585	9192.926	10593.093	12346.721	10258.545	12322.632	9844.602	10916.102	9656.953	10287.430	10988.045	10396.223	10641.994	11791.418	15091.740	12132.190	10722.174	10780.553	11756.956	11859.608	9919.159
X603142473F1	12865.11	14144.44	15487.15	12597.81	11751.80	13726.47	13467.11	13842.40	12766.10	13813.10	11378.95	13601.14	16027.14	10615.15	12799.17	13466.55	13116.87	13097.90	12006.18	12080.04	12467.92	13510.27	12766.22	14418.55	12959.61	13538.65	12291.82	11578.37	11954.37	11750.67	13352.36	12071.21	15568.22	12309.41	11979.32	13441.13	12472.98	12920.65	13620.02
X603142474F1	55.65195	113.19071	194.18924	103.83020	180.57798	121.42098	83.01474	110.71418	364.50900	32.75864	104.64428	188.85733	79.52794	26.61502	175.02852	143.38138	33.60516	110.55800	142.14425	218.48923	185.54305	253.76762	161.82339	74.74003	236.75233	233.32981	131.15650	177.39408	165.84570	128.42174	165.26094	207.04612	32.29873	9.21289	171.34913	173.86651	184.86303	168.34100	192.29942
X603142475F1	6210.742	4340.486	5883.482	5058.775	5087.090	4408.952	6290.864	7227.215	10130.887	6253.437	6474.765	7514.144	7182.998	6154.279	4453.460	6344.539	6057.889	4437.024	6639.311	6363.887	13104.367	6167.550	6326.654	2619.930	5145.867	7315.453	6752.916	6550.774	5792.641	6589.267	5692.770	4527.676	6581.457	5358.918	3565.755	4970.356	7441.159	5476.470	7186.413
X603142476F1	6104.740	6244.276	9274.204	5880.398	6330.674	5918.815	6685.983	6155.712	8138.356	4993.994	7507.185	7757.816	6388.993	5378.553	7293.967	5067.338	5217.728	6607.907	4627.039	5069.504	5451.270	7597.811	7580.212	7652.752	8398.671	8657.613	6630.517	5044.238	6728.813	7754.821	5304.869	7128.496	6155.689	6312.023	3713.456	6770.992	6471.440	6836.309	6312.662
X603142479F1	2569.509	2410.223	2326.820	2232.593	1127.935	1673.525	1395.185	3243.236	2378.349	2386.334	2158.223	1873.199	3134.488	2624.635	2210.183	2525.996	2525.213	2469.193	3676.066	2766.333	1829.815	1533.255	2371.691	2212.345	2600.181	2229.596	1863.773	2493.871	1080.822	1254.379	2073.361	2398.165	3040.993	2371.196	1202.924	1594.460	2387.231	1507.615	1491.301
X603142480F1	11533.58	13823.02	12903.93	11777.87	13100.82	13679.01	10727.66	11733.49	12305.66	12805.38	12784.97	13318.30	10885.02	10125.41	10975.39	13399.07	12570.67	13150.13	13925.52	12726.43	13273.38	10286.63	13843.62	13426.30	12450.29	11538.72	13834.12	12534.37	10881.60	12492.73	12891.85	11715.19	11861.51	11746.45	13212.13	13101.04	12190.54	12299.28	11811.99
X603142481F1	3249.669	3249.606	4116.953	3786.641	4514.512	3213.610	3473.231	3645.830	4361.691	3663.210	2674.714	3581.097	5129.512	4711.280	3223.471	3756.803	3632.685	3925.838	4022.421	4689.514	3783.879	3939.326	3485.224	2738.761	4473.890	3850.242	3512.331	4036.871	2935.358	3158.072	3276.639	3427.259	3722.335	3051.658	4313.654	3566.875	4546.184	3463.839	5159.696
X603142482F1	17.189590	33.616079	20.897620	21.188724	19.927066	25.680968	17.451119	30.367072	77.074225	15.597842	16.853066	14.633215	13.404532	12.905059	23.834326	17.483394	18.231615	45.564967	27.708634	15.430198	26.586487	22.043088	21.188701	19.378205	28.545245	58.224982	30.226860	11.596999	23.358185	24.040362	27.206692	19.045882	28.879543	15.143551	35.584525	12.846792	8.416471	22.014818	24.857961
X603142484F1	86.54155	250.52518	275.83871	172.90860	137.79204	225.43907	242.42267	286.57308	210.31748	108.22494	353.11208	193.97871	323.87747	126.40675	176.53735	230.46439	317.45188	249.16159	163.85749	192.41947	178.47939	189.58812	201.92744	319.47519	276.90196	225.89340	283.45170	209.75285	200.66586	165.42852	199.64779	196.82019	225.20721	147.68282	146.92005	144.80744	135.81205	175.21359	145.65576
X603142485F1	6007.142	8309.597	7361.642	4067.420	8602.225	7777.385	8295.297	4136.570	7346.668	5327.579	5921.085	9689.599	2827.946	3573.691	5825.626	6324.479	3937.284	8865.639	7331.662	7717.347	5667.027	9101.742	7268.620	10112.439	8409.133	8875.583	10808.161	7224.327	9683.408	12191.862	6938.585	7616.128	5186.837	5303.288	7360.085	10420.321	9687.825	10089.834	6488.564
X603142486F1	38.77264	32.99706	43.09474	67.50441	52.22288	40.18659	34.09432	53.48461	51.66871	46.32732	29.93207	40.10253	33.23983	36.99343	56.52719	39.51849	NA	47.40332	43.89089	50.39247	38.89768	41.90574	49.79840	31.33921	37.76103	46.15856	51.60371	45.55437	48.99727	36.54998	62.99496	37.44461	31.94703	29.22789	51.12129	46.45549	46.89073	40.10014	43.85192
X603142487F1	20044.28	16218.55	15303.66	18230.58	14758.97	15982.69	16510.37	18812.59	16961.43	18934.20	16334.20	16927.51	18925.63	16956.85	16896.80	13841.23	19140.96	16740.31	12909.08	12739.48	15901.99	17102.42	17227.24	14968.55	16123.43	15887.11	13635.55	13869.65	16132.90	15808.97	14870.69	18990.52	19067.77	18630.94	13355.75	16582.81	13759.72	14298.47	14501.69
X603142488F1	3416.156	5815.256	1492.329	2179.617	3788.803	5052.254	6578.037	2538.621	2388.302	4663.843	6288.808	4013.373	1457.085	2818.134	3448.815	4826.445	3666.099	3789.384	3238.842	3225.537	3589.319	1138.883	4823.201	6709.242	1386.591	1637.085	5484.506	3073.972	2806.927	4023.645	3888.280	4006.905	3061.340	3505.753	3195.230	3144.440	2447.385	3990.192	2587.498
X603142489F1	16240.86	16133.60	15030.03	18431.48	16104.72	14149.23	15256.73	16940.36	15419.84	16290.44	21831.40	15845.20	16379.72	17378.72	16554.81	15342.87	17450.82	14365.98	15722.75	16095.82	15252.39	14714.70	13578.53	14407.38	15075.45	15951.95	13849.76	16174.28	12967.34	15745.79	14443.11	15060.36	17748.68	15382.97	16636.68	13432.77	15749.54	17789.43	16348.09
X603142491F1	17873.70	18253.76	20446.16	17508.96	20909.04	18401.98	17883.26	17929.04	28035.67	16628.20	19568.35	20988.59	18159.27	18619.36	19211.72	21104.38	16796.75	18916.58	20188.46	23527.78	23982.29	21480.27	20038.99	15938.37	20396.39	21572.04	19015.94	20879.68	19846.80	17917.02	21838.55	19199.17	13698.77	15623.59	23388.30	18634.31	21544.61	20119.99	26244.09
X603142492F1	5193.036	5249.772	5866.441	4458.433	5756.897	5364.590	5734.697	4631.581	5691.945	4950.721	7069.751	5469.714	4778.691	5961.078	6141.896	5279.206	4526.793	5515.448	7455.479	5786.421	5465.717	6245.372	5860.227	4728.686	4477.471	5572.544	5731.375	6195.424	6180.040	5548.400	5115.994	5339.043	4633.093	5491.090	6047.042	5747.922	5341.059	5472.406	4958.474
X603142494F1	36.83266	171.51646	166.77898	67.32983	54.93509	146.10460	69.95783	97.75007	166.27483	38.40717	119.07754	103.73915	83.05109	19.85908	93.84954	166.24934	41.71028	253.29882	205.19749	148.34277	133.50950	129.76508	134.79254	116.23085	195.28817	275.31902	159.56163	80.46151	155.83741	57.93339	195.77148	178.89565	39.32100	26.09768	135.38616	107.24696	73.74470	73.84390	105.54091
X603142495F1	298.9361	443.2136	651.8600	560.6259	603.8934	515.8891	370.2971	470.0000	1161.0871	246.7086	321.9619	468.2644	803.3966	422.4685	585.9498	670.1451	330.0259	424.2466	473.2525	754.1350	639.1620	726.0264	756.4561	313.6383	632.8191	708.4076	387.6053	707.3493	540.0839	569.1257	643.0307	653.3312	206.7099	151.4635	581.9437	557.3626	449.1134	526.2649	801.9106
X603142496F1	6586.855	5308.520	5954.873	6895.531	4301.903	4541.423	5309.598	6859.489	3329.135	7425.060	5477.775	4539.216	6801.418	4353.450	4348.996	4609.341	7873.813	6976.035	4578.172	4483.237	4546.972	4276.347	3976.496	4786.388	4220.902	6477.687	5736.812	6208.086	4779.516	4856.463	5890.026	6761.382	7806.299	6278.627	6033.068	3850.437	4238.647	4542.905	5600.400
X603142501F1	9113.049	8235.829	9679.154	8796.316	6627.202	8102.706	7796.922	11823.740	7611.116	11003.921	8445.863	9377.337	12241.394	8671.658	8714.624	6917.868	10770.272	7563.385	8345.740	6680.296	7769.472	10961.122	8522.890	9073.747	8165.952	8764.766	6518.414	6786.776	8048.379	6707.662	8085.639	9652.737	10805.622	9661.773	7432.863	8463.412	8707.590	7741.443	8489.610
X603142503F1	1772.617	3599.986	3813.223	2112.819	4494.033	3948.854	3048.826	2038.867	4070.592	1733.746	5221.687	3514.349	2895.751	3153.359	3351.712	3728.984	1345.500	3446.973	3679.043	4615.266	3408.817	3583.276	4226.970	2608.001	4244.400	3412.836	2788.637	4067.515	3481.134	3238.324	3472.839	3598.126	1655.030	1075.058	4198.231	3920.000	4802.683	3682.314	4491.500
X603142504F1	111.90154	59.74624	65.37336	66.81115	57.65912	68.24745	54.30723	61.12425	66.58010	102.29391	67.90247	58.51798	96.04240	104.08794	57.61789	55.60208	72.13539	70.29043	59.63740	51.17534	54.05096	56.85945	77.87506	67.00710	50.85844	54.70753	64.28070	60.41900	59.08548	58.10975	58.97807	48.57993	115.28746	96.28726	54.68570	84.24638	75.60311	72.49043	63.50597
X603142505F1	15458.79	22366.80	12795.44	14539.78	11604.35	13779.71	15628.13	15212.60	15846.95	17889.06	19601.79	13642.52	15833.66	21938.55	13314.33	12703.24	16109.81	11292.84	14353.95	16762.94	17402.40	11286.57	14008.27	15149.22	15307.00	12401.23	13079.99	17871.44	13441.69	17229.90	13124.78	13083.91	18889.30	16900.76	11484.58	12595.55	12451.86	13278.94	13969.17
X603142506F1	4160.860	3247.495	4395.355	4268.221	2123.299	3703.295	4054.000	4577.269	2205.200	4843.956	4178.014	2878.303	3995.756	967.095	2800.974	2965.330	5652.064	3907.058	2243.440	2359.200	2696.775	2336.850	3263.551	4104.111	2712.740	3129.307	3244.562	2452.906	2419.218	2259.741	3102.841	1832.479	4829.178	5271.741	2318.970	2869.900	2245.991	2007.758	2509.524
X603142507F1	193.97017	170.52954	268.38962	226.35663	124.22715	216.51244	226.81605	156.02053	85.76117	218.32714	278.41009	102.48873	110.73786	92.32121	116.95943	186.52438	263.25187	154.10604	110.95920	105.03268	102.46734	86.00044	188.06059	250.14782	111.10967	152.99449	155.68597	125.14366	98.62121	79.68921	177.72740	96.77695	145.22412	145.88973	125.74677	111.61391	98.48239	82.91701	121.15776
X603142508F1	2081.358	2028.172	4694.123	3472.361	2882.414	3138.819	3197.180	5216.232	4937.068	5929.152	3189.175	3277.283	5609.865	1632.136	2159.362	3517.795	4064.155	2330.830	2912.304	2133.777	3434.710	3863.812	2402.645	1509.619	2259.790	3814.980	3131.444	3195.177	2624.049	3191.795	2723.112	2893.870	3168.680	2416.617	3490.857	2735.725	3597.456	2929.100	3625.794
X603142509F1	24456.34	27958.63	23545.42	24060.50	24582.17	28668.91	24601.75	23178.58	22307.83	22003.62	23374.79	23907.12	26724.49	25527.62	24853.51	23652.08	23348.38	26372.06	20952.22	24058.37	24484.63	24501.81	21770.02	28070.84	23705.28	24914.90	21901.25	22954.12	22153.87	23443.32	23285.84	23697.61	25467.50	24401.28	22501.79	20529.33	21636.11	21267.75	20865.30
X603142510F1	434.7139	519.3693	616.1755	536.4965	656.9670	834.1483	510.4288	391.3753	1628.4141	320.5080	402.6893	564.6257	609.7742	231.9390	581.5586	990.3810	295.5698	543.2408	837.3250	740.9592	851.4778	635.3462	1336.3965	674.8243	514.1050	1041.5368	640.4752	523.0304	567.4768	366.1408	916.9703	594.4684	197.0798	296.9515	565.4921	715.6489	621.2806	578.3453	570.4367
X603142511F1	5820.339	7280.581	8055.541	6149.183	6024.030	8809.161	6723.703	6936.708	4556.564	5800.583	7191.759	5459.869	6625.271	4790.836	6579.948	7641.305	7518.508	7776.802	6482.704	4602.304	6450.904	6277.225	6234.196	8293.187	4863.614	7266.390	7095.978	5237.362	5733.455	5007.957	8202.968	6849.621	6918.546	6452.028	6985.573	6542.678	4964.771	5465.939	4509.476
X603142512F1	16100.60	14579.31	16789.25	16789.25	12947.77	14292.87	13621.86	18164.86	16035.16	15807.82	13690.82	15292.61	18823.16	15643.01	13654.69	14504.36	16561.45	14057.17	16470.73	15386.22	14295.92	18629.50	12709.71	14450.09	15086.59	14933.87	14544.79	14546.27	15209.95	12624.72	14743.72	17281.73	18368.68	15658.94	15849.82	14859.51	15345.79	14805.53	16442.87
X603142513F1	93.36143	191.34488	308.45291	95.93321	251.28932	171.78272	178.00946	115.30639	199.48435	100.99730	150.00514	247.46607	95.61313	76.66126	197.11951	278.60429	81.62279	222.36174	190.53621	183.48658	227.10197	194.76631	183.10438	153.73603	189.95098	252.10872	224.40458	206.40943	203.13764	235.79196	240.74277	166.55539	43.29683	133.01829	176.68913	325.51836	307.55818	255.01995	200.66911
X603142514F1	13716.64	16643.53	18497.17	15234.78	21152.17	16567.17	16340.60	15560.25	28545.95	12499.48	15057.23	21315.58	14062.94	14501.61	18684.10	19171.33	11375.04	15614.98	16169.46	22275.37	24064.98	20495.21	19207.13	14971.92	19498.15	19537.01	17162.72	19556.10	20871.33	20754.64	17638.91	21742.93	14460.39	11896.98	19988.59	19717.24	23822.51	21922.99	22161.16
X603142515F1	9046.018	6937.141	7385.966	8327.935	7404.149	7475.655	6148.801	8412.775	7257.102	9268.295	7882.723	6136.333	9640.531	10880.169	7212.316	7270.791	8777.860	7036.239	6191.725	7813.139	6547.713	7460.764	6613.163	7133.114	6998.164	7624.622	6312.244	6914.727	6406.159	6015.925	6703.654	6483.108	8175.294	6777.897	8317.203	6922.750	7523.666	6715.029	7419.277
X603142516F1	4933.285	6320.514	6864.068	6277.574	7032.906	6492.737	5323.323	6318.844	6623.518	5652.102	4006.399	5619.313	5789.087	7660.910	7129.812	6317.460	5840.604	5915.026	6169.966	6492.362	9245.509	6751.920	5112.405	5984.701	6793.782	6132.291	5412.245	7166.679	6207.357	5794.972	5368.927	6610.176	5519.700	4722.353	7196.201	6426.737	5649.491	6736.907	6722.802
X603142517F1	2759.782	2440.193	3665.061	2788.384	2991.239	2420.551	2568.425	2624.115	3864.842	2414.343	3285.863	3723.955	2885.532	2263.764	3126.754	2046.991	2064.843	2572.173	2112.775	2246.263	2198.956	3647.603	3508.660	2936.264	3563.808	3895.317	3061.529	2075.069	3247.829	3554.522	2136.761	3638.921	2580.836	2413.682	1459.085	3125.912	3042.624	3330.715	2911.991
X603142518F1	239.87047	411.37994	522.86178	516.14809	310.23775	502.69973	224.67524	465.59476	332.42018	464.22482	430.54965	345.54352	563.08130	87.57345	278.45444	418.22379	523.29103	394.76950	317.77584	352.65141	238.80503	315.06704	405.86694	417.56174	382.02664	424.85427	368.00851	325.26373	220.50535	300.52915	378.08361	233.17455	255.38267	292.94002	340.28024	463.94682	264.97216	351.41401	293.40801
X603142519F1	18705.93	29269.64	23160.71	16866.06	28363.39	28922.33	26593.72	14687.93	27691.67	15599.02	22736.84	26410.66	11298.01	19790.17	29595.54	27772.23	16265.80	27702.24	23513.30	25446.26	30408.62	26218.10	27746.70	26948.81	28539.43	25758.80	27229.25	24964.27	30627.92	28436.20	30643.87	26138.88	10942.37	13520.39	28886.72	29451.63	24600.74	26295.71	23198.45
X603142520F1	1135.9183	1296.5949	1571.3001	1370.9249	2166.5974	1601.0036	1376.5080	988.6524	2606.9746	966.0549	1159.1506	2006.1949	1195.8923	901.1196	1885.7801	1544.6020	891.8902	1652.2149	1565.9101	1858.0220	3425.2354	1985.0136	2048.0591	1176.9242	1576.6539	1744.4178	1669.2298	1655.5651	1874.1301	2660.4311	1467.8147	1773.0083	1026.0498	1091.9938	1614.0309	2183.9930	2280.5527	1913.6569	1918.1948
X603142521F1	24.086457	123.338193	106.694552	27.525536	95.634260	79.222424	60.023255	28.994278	204.657081	17.057306	68.604688	105.958426	12.856171	25.651802	50.034099	93.149769	20.802497	69.932694	73.422431	103.864902	271.798126	108.159661	79.913659	98.333855	143.445929	84.075077	74.406441	118.134801	72.449011	89.675177	63.210476	103.107327	9.555166	26.033396	41.418951	66.867021	104.025144	59.308220	175.174996
X603142522F1	1376.1656	2353.2211	2049.5881	1093.4910	2859.4569	2247.8517	3870.9323	936.8691	4069.0984	968.6698	1880.2198	2757.4110	602.5141	1006.1991	2703.9337	3341.5881	675.1223	2427.0319	2627.1981	3136.0933	2492.8381	3775.5339	3418.2784	3294.4699	2098.2833	1684.3947	2795.7746	2879.7273	3017.7764	3524.7323	3039.7165	2649.8097	497.8100	1135.1299	1892.5949	3717.9157	3156.9449	3322.0260	2017.8760
X603142523F1	1045.8461	1262.2936	1638.6493	1173.8152	1799.9047	938.3392	1259.1204	1249.7265	2503.3388	1056.8951	1814.4306	1429.4425	1275.4425	1262.6291	1389.4000	1507.4346	866.7154	1225.5596	2081.0748	1831.2352	1603.9614	1978.8579	1268.1305	1035.4458	1642.3806	1666.5499	1464.4704	2041.2166	1726.7431	2123.1469	1186.4786	1797.1631	974.0321	904.2432	2076.0924	1463.5904	2301.5310	2028.8532	2124.1398
X603142524F1	62.171974	145.296565	157.109181	80.093563	73.570893	93.267857	117.608118	80.631334	604.688734	61.070283	100.839840	168.040459	9.169198	1.443576	89.949443	101.762669	24.451541	136.649967	133.855407	135.214673	371.976326	306.691047	123.672215	72.409346	179.097217	296.468169	81.591374	540.228278	328.759916	231.644940	146.130567	112.715712	24.668779	11.926148	138.038652	119.023460	119.636295	226.451878	101.252397
X603142525F1	9.247599	6.977956	8.374547	8.796142	6.439141	7.213424	7.546461	9.068338	10.341875	8.457907	6.945320	7.335147	10.531359	10.232300	7.227090	8.868831	8.283473	8.366213	7.888500	6.842923	7.805451	7.045864	8.557422	7.045864	7.524915	7.493630	7.243659	6.467915	6.731882	7.738558	7.540146	7.385162	12.254400	8.115110	7.868844	7.548996	5.850449	6.985249	7.114094
X603142526F1	19875.63	27362.21	27387.93	20559.37	29699.12	29458.87	27141.62	19598.12	31526.78	20782.50	38519.07	26920.58	19501.21	21440.27	27498.28	28356.77	19682.76	26432.16	26471.94	27139.39	29134.29	23939.40	27616.84	24064.74	26659.68	26243.09	25708.57	29006.41	26837.14	27098.01	24444.69	25562.55	17152.95	16647.57	30621.48	26789.74	29748.23	30907.90	31961.93
X603142527F1	13.224646	8.710292	9.698849	12.337269	8.938365	10.411827	16.626434	15.449139	9.135596	14.118233	9.418789	7.398306	15.066689	16.212394	9.280483	9.586250	16.087456	9.624984	10.105580	7.899322	8.860619	8.184880	9.174912	8.674528	16.139031	10.894154	9.931909	7.948476	7.565241	8.759364	8.706525	9.542885	13.129253	11.933341	13.862251	8.766416	11.281389	8.364656	8.375708
X603142528F1	29.67670	28.10962	21.80371	24.00987	19.49502	25.90182	41.30484	26.45256	30.34744	28.99137	23.83392	31.78931	19.04005	17.01349	46.44482	35.02773	33.83941	24.06136	27.05367	27.20493	20.15513	27.78965	31.31617	24.83843	24.70604	34.17245	27.48644	24.72227	26.27985	23.50362	26.20326	23.98700	20.65353	19.09057	19.03356	42.65109	37.05967	29.78872	26.35786
X603142529F1	123.10509	44.76188	61.98855	71.14454	48.72994	61.98886	33.39432	209.83635	30.77977	113.74048	61.31566	39.39421	89.70723	121.15924	39.96344	45.30013	149.36484	37.94190	35.02017	52.35038	31.69089	31.76062	53.67170	60.22074	35.26334	25.44310	49.13575	32.86389	30.85657	35.76616	43.24501	21.05921	212.00397	207.45593	51.67508	30.42872	27.49789	27.05902	36.28031
X603142530F1	39.956788	81.322555	165.120612	34.053479	83.060911	111.965393	65.409240	41.174430	56.652036	50.443758	148.349526	68.660306	9.676084	39.425797	102.528750	94.430354	50.750770	63.129462	60.279720	80.661701	83.296292	102.628960	81.719829	142.853362	52.597129	65.959488	78.547301	52.458527	69.873853	54.591253	79.334025	57.794865	24.863229	40.518372	60.927842	66.184382	59.479194	67.519017	79.536650
X603142531F1	5823.860	6847.179	4369.840	5476.188	6764.732	6432.157	8488.641	4655.857	4341.173	6357.374	7590.032	7717.584	3797.460	4747.226	8293.790	8524.862	4839.247	7662.742	8928.415	8331.566	6338.278	4579.821	6868.446	7693.910	4067.166	7139.043	7237.497	4521.416	6970.212	7648.920	6921.109	5978.193	5460.056	3107.053	6289.232	6626.028	6217.347	6309.947	5467.404
X603142532F1	12607.90	14289.27	15778.56	13588.63	15714.69	12862.19	13491.41	11926.25	12252.79	13389.03	12088.85	13806.75	18118.57	17699.53	12040.91	13793.25	11089.57	13596.77	12350.75	14260.17	14899.09	12068.99	12869.09	11725.89	15117.44	13353.66	11532.84	15082.68	13333.61	13241.89	13350.13	14949.68	11421.31	11292.75	16105.45	15337.32	14341.04	14788.39	16167.29
X603142533F1	23137.99	25044.79	27498.06	25468.22	20547.94	23358.27	23501.88	26514.30	23667.54	25890.35	18915.39	20501.84	25263.97	27761.16	23599.09	25785.24	26228.56	27356.58	23840.95	19834.70	19524.54	24481.78	23944.23	23452.02	20737.84	23964.22	23193.93	22457.80	20069.07	17873.85	24629.63	21370.96	26865.75	23027.26	24629.63	20042.02	22545.25	19286.40	24143.81
X603142534F1	78.26093	20.31865	19.27418	43.40405	17.76492	20.42227	20.47372	33.98484	20.18528	49.76572	17.18803	22.47508	44.56661	153.32654	17.23964	20.85079	43.71103	37.44343	22.57605	20.62191	24.79130	17.76684	18.77373	19.73753	24.79727	21.06175	12.41750	22.49477	23.19237	19.51179	19.11093	18.82182	50.30633	110.98254	17.56568	21.77767	23.54142	25.44082	17.91149
X603142535F1	17204.22	16351.54	19161.24	16790.94	17488.45	15916.52	17310.31	15869.21	14830.29	16660.18	16860.00	15635.67	17062.07	14181.88	14388.16	15581.11	16743.47	16995.05	15078.84	14497.52	17900.61	13487.56	17294.10	17696.44	17782.26	18051.93	15957.26	15878.17	17075.01	17184.66	16508.46	16959.82	16194.22	15115.27	14433.82	16051.81	13131.54	13852.74	13248.97
X603142536F1	196.40798	47.74126	54.35040	168.07638	38.75032	59.05646	52.91278	157.86896	50.53559	109.60271	65.28999	63.42479	174.83928	296.26689	47.20377	54.39482	139.01498	58.88580	50.87458	40.50062	49.72619	53.68325	66.61721	49.69762	45.30097	48.63841	54.48865	47.45957	54.95810	59.70458	53.21548	69.50117	377.50279	237.94413	49.64962	54.90721	55.16381	63.32133	55.44540
X603142537F1	1577.336	1715.450	2112.619	2163.278	1925.238	2466.442	1303.842	1989.738	1511.846	1747.843	1657.324	1664.915	3373.031	2406.357	1472.116	1995.167	2029.461	1504.453	1323.421	1948.597	1196.082	1520.094	1877.474	1493.727	1910.796	1378.937	1426.216	1602.066	1554.429	1565.850	1929.236	1989.155	2226.609	1585.226	1535.525	1628.137	1583.631	1566.828	2119.170
X603142538F1	2679.205	3660.282	3512.738	2446.101	2911.917	3378.496	3135.923	3376.241	3199.432	2531.368	3982.911	3549.048	3358.739	2182.444	2422.421	3109.957	2858.969	3535.693	3203.228	2846.105	2606.195	3115.479	3103.307	3312.389	3401.997	3397.060	3725.453	2748.601	2735.086	3650.260	3161.556	3214.862	3598.777	3992.774	2889.192	3803.583	3516.577	3262.799	2686.760
X603142539F1	5325.522	7126.161	6405.142	5145.108	8099.587	7331.689	6231.589	4297.291	8281.998	5771.829	5819.163	7582.002	4271.249	5569.324	7512.730	7124.106	4849.995	7055.592	6356.822	7724.530	7607.992	9189.835	7610.565	5765.886	6981.010	7012.332	6664.852	7329.596	7853.498	8167.034	6633.507	6615.564	4240.456	4166.352	6650.351	8196.177	8375.159	8264.143	6056.369
X603142540F1	2347.8934	849.4218	210.2752	1222.4143	530.9754	605.5962	1980.9297	2535.4950	1291.8718	2997.7940	4318.9571	1852.0361	605.2720	4947.9920	429.4777	555.5005	2269.1509	881.6917	574.7746	1061.6364	950.3934	390.6048	454.9486	1768.6999	2451.3027	406.3309	757.8450	2734.9180	1303.5515	935.2540	939.0000	978.0548	1558.4017	1227.7098	895.8822	399.8997	767.4302	909.1186	1249.8303
X603142541F1	2122.8882	3264.7927	3166.2880	2441.9618	5066.1472	2952.9604	2536.4605	1783.6762	5463.4315	1368.1927	2367.1423	3042.4496	2366.4628	2879.4860	3451.3941	3498.1058	947.0301	2596.7745	3311.3638	4234.6998	3402.4637	4308.4243	3724.2101	2735.6739	3908.0258	3611.1616	3188.3349	3810.0016	3148.3255	4376.6084	3261.0369	3176.0625	1385.8762	1392.5014	4512.5928	4258.8829	4374.9917	4645.8357	5029.4278
X603142542F1	1079.2617	1005.8652	1567.9993	1078.8027	1887.0737	1310.0216	1422.5765	758.6292	1384.5470	1081.0772	1241.9598	1503.3907	955.5703	1007.7517	1088.9592	1522.2625	1065.9892	1906.3280	1764.0242	2161.7459	1182.2104	1596.7469	1640.1411	923.9347	1641.9190	1543.3938	1745.1842	1533.2149	1284.8193	1457.0530	1486.1391	1661.1808	652.6643	694.4339	1691.5479	2043.8675	2227.3398	1209.8195	1726.5809
X603142543F1	22009.58	22114.44	14991.62	23199.82	21399.74	25197.15	29032.38	20961.16	20407.39	21017.79	25038.97	24934.45	22184.99	24507.01	23124.00	21177.20	22184.99	20847.51	18564.58	17386.85	18571.20	17148.47	32086.14	27848.93	18738.29	21781.73	19238.64	19758.45	24058.07	25529.95	23966.51	18656.33	27584.49	28313.05	16517.52	22898.18	21253.64	17338.45	20329.66
X603142544F1	669.0510	310.9743	155.9145	304.2548	255.5660	333.6409	585.5007	401.4186	156.0681	647.2853	236.8220	300.8318	382.4350	649.9275	255.6575	231.6383	585.1244	290.7725	265.7144	184.6194	258.9885	229.8299	351.2007	583.7089	163.7900	184.0360	365.4102	186.6839	306.2024	280.4213	259.6891	228.2475	767.5550	875.4848	165.4668	286.1675	234.2747	303.2567	148.8240
X603142545F1	2920.201	3626.788	4006.460	2604.322	4610.425	4391.460	3195.235	2408.466	4590.462	2485.027	3271.307	3962.532	2836.686	2749.657	3507.806	3928.046	2150.755	3784.700	3917.264	4464.968	3696.583	4848.576	4585.416	3640.171	4255.906	4605.642	3991.824	3543.303	3253.647	4322.363	3520.156	4216.669	2142.675	2794.986	4172.316	5025.622	5029.137	4358.469	4596.112
X603142546F1	10502.967	7811.501	9800.651	13060.094	7684.659	7300.949	6815.888	12654.734	8604.723	11041.295	7871.101	6510.385	14784.465	12735.577	8512.014	6169.244	11737.850	6483.505	6432.555	9403.431	6470.675	7891.557	7830.757	7749.266	8741.649	9627.748	6100.424	7572.551	7581.622	6943.380	6920.520	7035.197	12069.165	12559.473	7941.639	7063.636	6228.250	7162.370	8684.381
X603142547F1	29.24741	33.36751	33.86107	29.78817	28.68686	47.25848	21.76011	37.95419	22.84340	32.34570	33.20817	26.81547	50.58012	26.69701	27.51211	37.66627	32.77345	42.38388	33.45551	21.55414	41.56878	25.61468	41.89045	26.92103	23.94460	21.46836	35.43769	25.46883	24.75085	41.88909	32.02663	42.44572	30.64356	38.79305	32.47218	29.26496	27.61798	32.39234	19.55948
X603142548F1	6348.665	6588.700	7357.698	5348.243	9748.105	8939.878	7756.971	5241.692	10974.055	6859.810	7502.786	8961.708	3988.575	7768.793	9556.537	9743.862	4794.571	8621.517	8977.085	10467.519	9197.799	10477.487	9655.430	7097.323	9116.697	8648.973	8832.695	9018.811	9628.476	8368.702	9136.873	10031.753	4593.144	4835.378	9672.084	10367.283	11936.486	10457.780	9209.889
X603142549F1	3910.121	6297.645	5992.972	2705.291	7399.513	7211.398	6430.022	2541.876	5744.687	2948.420	7527.443	7566.313	3261.283	3309.175	5612.382	6931.330	2047.143	7740.745	5708.186	6588.589	9008.637	5300.189	6749.674	5694.078	6152.063	5581.825	6403.843	6280.968	6261.725	5807.154	6824.433	5383.699	1747.842	1917.010	6764.999	7005.079	6133.118	5649.515	5327.706
X603142550F1	498.30940	662.79775	916.12626	959.79377	1112.68207	347.32919	344.52688	1077.89515	1059.00899	324.21728	269.68372	987.84557	901.25272	673.39411	826.89050	589.23470	540.41886	1026.47167	625.82699	1116.48330	2215.32143	1080.84794	307.77192	262.82491	1168.82528	1803.64743	1249.55397	1573.83811	497.13446	708.63847	1034.21507	309.87875	134.37443	65.31198	1362.18544	2053.41680	872.75932	1350.50106	1077.16724
X603142551F1	14.96093	12.89665	23.09930	14.51629	21.72804	17.03354	14.28473	22.09558	12.22423	15.81829	36.52435	11.24931	24.95492	19.90262	19.44412	20.48970	17.35396	13.61318	17.11073	16.48318	13.64981	16.02135	13.95178	17.79944	13.52537	15.43810	13.53163	15.28419	17.80560	16.31686	13.75104	15.18811	19.87517	23.54893	14.64473	16.59591	14.45852	14.27242	15.57798
X603142552F1	634.96113	989.15514	818.07840	1139.27384	2951.39303	858.91326	678.30907	649.46377	1016.85385	872.53016	329.60605	169.88062	1783.18958	131.22369	391.21552	1177.16982	99.91253	392.92897	493.30534	238.63079	466.89055	761.67370	358.82661	209.87315	293.87782	4707.16573	651.93567	NA	214.67824	746.24348	154.51720	315.36945	91.72439	5854.98031	486.03324	193.03414	226.46984	484.12550	298.75314
X603142553F1	5479.781	9006.272	5311.679	4209.867	6922.089	9141.895	8327.132	6974.463	4934.118	8205.091	7804.117	8982.846	7235.210	6175.067	9638.688	9687.623	7834.685	8354.177	11784.534	8433.824	8268.880	3828.287	8874.203	6453.407	4270.593	6260.098	9549.089	8193.960	4130.895	7626.068	8683.724	11656.195	7664.541	5975.207	9385.891	10347.731	7499.743	9395.556	3746.191
X603142554F1	167.13394	174.64126	57.66365	160.54469	101.72333	159.54253	187.24279	188.99739	51.84877	122.05540	204.86109	78.79129	239.65400	926.13415	93.56087	65.56578	290.81989	57.19728	66.57633	67.19780	65.81846	68.10220	127.04307	158.55872	58.37782	100.29599	55.47347	75.12208	84.31286	98.23469	88.57272	87.23377	525.10064	358.85677	61.65029	87.87314	71.06801	81.42688	91.50732
X603142555F1	23.14117	26.16455	44.26639	24.85038	21.69868	32.01748	21.29494	43.98600	32.52666	24.19431	36.65880	25.46268	26.19401	21.31593	33.02793	33.94986	27.01921	22.62684	33.24082	22.04081	23.99143	29.56638	31.89760	45.77689	20.87112	20.66998	28.02683	22.40269	32.85685	42.81896	26.02600	30.04432	50.45660	21.36450	25.85309	36.91536	53.37128	50.20894	27.34520
X603142556F1	770.0503	2326.1348	1057.2723	553.6289	1121.5454	833.4745	1325.3960	1672.5977	1507.9422	415.2957	1298.6351	1769.0685	713.8529	529.8684	840.9316	1082.8684	833.7884	1155.2867	1422.7167	1703.8514	2614.3970	2247.0146	1111.8910	1167.8551	1753.5572	2149.1265	2074.6168	1674.3583	1770.0456	1795.2410	578.0909	1445.1745	654.1412	910.1406	556.7227	728.7149	2071.0423	1252.4150	1423.5151
X603142557F1	387.6739	531.9496	449.0950	376.3893	798.0847	643.7978	539.3558	344.2335	468.6521	409.6713	541.3558	657.4063	248.6270	425.5036	723.4512	778.4252	345.1930	564.2452	550.3048	715.9249	802.2312	614.6495	750.8351	420.5518	579.9640	295.6493	546.7842	612.3737	726.1577	585.5883	659.4603	650.5311	312.4439	282.1724	693.3650	749.8512	691.9934	640.1750	511.4488
X603142558F1	11210.683	10585.256	9492.727	9024.113	10512.984	9555.095	8168.647	6188.671	6245.786	6531.777	8052.018	9319.748	7597.951	9437.838	11922.897	12191.158	7382.933	11522.223	12547.531	12836.942	9481.617	10994.877	10453.893	10193.783	10050.155	7835.152	6411.257	6140.013	9838.897	9842.843	9499.184	14658.589	9066.807	10129.408	11725.379	9107.110	10756.032	9314.717	11987.717
X603142559F1	3522.743	4608.121	6296.300	4799.729	4757.538	5428.254	4309.647	5162.735	5023.832	4525.964	4116.870	4663.621	6318.924	4186.519	3526.415	5107.480	4746.833	4430.079	3856.410	4892.586	6087.652	4137.073	5300.232	3354.871	6517.109	4773.541	3942.164	5783.964	3925.125	4510.130	4993.292	4201.324	4564.163	3587.632	4721.886	4876.805	3530.262	3749.824	5196.132
X603142560F1	6560.859	7223.169	9228.459	6517.303	7549.031	9498.287	8844.338	7013.278	10200.950	6947.733	7309.707	9331.961	9230.383	8842.447	7816.591	10830.555	5875.664	7712.986	7585.239	10463.621	9556.894	9307.540	9902.059	7772.403	12234.840	8802.480	8545.175	7521.398	10572.756	7274.073	8867.576	9880.957	6312.647	5557.149	5555.017	9102.435	10955.382	10241.087	11594.138
X603142562F1	7426.284	11287.630	13250.734	12674.847	11840.289	13787.371	8009.842	13230.675	11498.974	9872.884	14854.235	12607.670	17093.249	10428.288	9296.379	13313.867	12571.839	10220.340	10266.532	14614.572	12191.247	11383.618	13384.782	10692.311	13444.871	14632.352	10111.944	12504.934	9870.544	8698.536	12598.420	9866.243	13271.260	6845.259	12820.646	10806.875	13004.650	8463.843	13181.585
X603142563F1	18785.90	18115.70	20607.76	18444.72	22495.27	18833.60	16593.98	16899.50	21454.58	18156.55	15244.31	17145.15	19467.10	21322.93	20756.59	20519.49	16247.76	18617.33	20903.00	22748.34	21604.20	23283.88	20176.13	15723.70	21099.17	19989.11	20108.22	19734.69	18845.49	17690.88	19763.47	19753.39	16467.50	18322.54	20067.85	20385.30	23407.95	22420.47	21861.32
X603142564F1	3911.972	3943.855	4641.722	3464.183	5290.155	4883.215	4169.281	3027.522	6024.905	3471.676	3445.333	5109.595	3527.376	3180.260	4714.003	4314.635	2596.602	4202.806	4599.646	5504.276	7844.173	5955.901	5491.930	3951.934	4266.027	5512.365	4778.031	3547.437	4846.178	5960.730	4225.984	5133.792	2938.994	3548.723	3303.365	4781.290	5614.455	4859.836	4110.243
X603142565F1	8112.600	7443.121	6726.843	7734.147	8641.472	7328.373	7940.523	6999.758	11937.718	6166.331	13740.438	7689.273	6635.288	7484.348	9187.041	8180.944	6641.721	7752.351	8290.508	8499.681	7400.053	7488.769	10069.160	9148.342	7279.953	9182.289	8367.471	8472.271	8656.909	10131.881	6971.214	7665.843	7817.449	8496.748	7850.197	8543.186	8102.669	7865.386	5114.488
X603142567F1	4876.4430	1173.1254	993.2658	3290.8947	892.4251	1039.6771	1449.2724	2436.9234	307.6653	5894.9170	1529.5491	691.4893	1981.4639	3384.9617	889.8347	1127.5703	4583.3095	1329.0975	788.2583	734.5850	1232.7787	672.5563	813.3957	1474.7032	653.1248	659.9543	1061.3627	1031.7153	662.7919	660.3206	971.5057	638.2199	3569.3823	6486.7625	681.8789	696.9598	600.4131	765.8464	620.9437
X603142568F1	7648.830	6307.442	6497.315	9147.507	4436.575	7292.821	7008.093	7957.181	3706.705	7614.769	10299.831	4694.146	10614.145	10206.178	4833.380	4676.003	8867.132	5210.588	3870.686	4491.243	3919.722	4544.792	5394.299	7295.432	5256.836	5450.169	4921.206	4904.091	4306.213	5137.646	4645.224	4420.361	10592.083	9915.764	4122.041	4255.697	4629.624	4481.880	5366.315
X603142569F1	340.0720	404.9439	387.2275	382.7127	259.8084	375.0757	302.4444	156.8287	219.3165	423.1877	571.5015	291.1400	226.2011	189.0372	252.9333	325.3063	374.9642	355.5743	263.5171	233.7542	323.8648	217.0512	327.3730	344.9289	256.6470	357.9137	278.1495	326.3656	200.8183	218.7051	313.8438	180.7074	194.8216	323.3196	221.0344	289.4733	238.1118	210.8248	198.3559
X603142570F1	6819.254	6985.080	8911.639	6271.194	7697.436	9147.823	9124.499	7044.016	11884.718	7258.235	7274.193	9745.870	9519.856	9374.496	9233.935	10757.255	5994.164	7433.333	7477.861	10814.915	9247.464	9050.139	9954.916	7849.836	12761.628	9228.274	9047.195	7647.915	10442.369	6873.252	8739.512	10685.146	6186.091	5422.733	5639.881	9297.278	10061.264	9826.942	10945.632
X603142571F1	22.62019	57.14098	40.11116	40.14986	33.18957	44.93866	31.15063	60.88041	159.83515	24.11458	22.17177	65.37419	31.72206	181.09426	35.28232	51.98021	18.38766	76.99208	42.05709	90.71397	69.25130	18.93758	42.53574	73.69257	174.36318	80.75342	52.08983	133.11813	47.80236	47.77970	77.14938	30.05385	17.04266	13.76602	88.33045	29.63293	17.54325	37.25559	70.29494
X603142572F1	4177.740	3115.347	3847.748	5194.299	2604.063	3404.314	2665.931	5442.152	2936.227	4556.976	2734.378	3297.312	6478.340	4469.992	2700.218	3274.456	5085.211	3382.426	3243.534	3146.459	2786.826	2770.847	2924.828	4019.036	2671.547	3323.247	2973.350	2752.035	2111.478	2621.415	2979.209	2896.709	6022.972	5606.729	3452.668	3080.705	2995.043	2803.195	3089.810
X603142573F1	7753.809	6563.694	8883.417	7462.973	5617.536	6556.216	6834.664	7261.340	5351.052	6707.098	7263.449	6377.421	6927.272	6070.724	5656.591	7432.583	8082.820	7186.650	6901.710	7417.535	5514.920	7171.111	8537.270	7432.880	7519.971	6385.154	5724.157	8265.246	7033.419	5012.308	6644.080	7164.359	7169.011	7243.785	5130.728	5942.873	6032.553	4527.183	6383.648
X603142574F1	997.9387	1898.1093	1588.1563	652.9544	1127.3595	1139.7016	497.6163	1608.3286	2041.8002	1337.6167	723.0568	2052.9141	1408.9927	1716.7909	720.8101	1117.8265	853.2169	1130.3504	1069.5931	1119.3087	NA	789.6867	1025.9901	691.1735	1597.2179	980.2226	984.6002	2387.1057	862.4643	2330.4281	1260.4096	1168.0851	1536.9256	497.3998	976.5302	1384.2031	1234.1376	830.6362	1866.2836
X603142575F1	42.29498	65.88688	116.32675	29.60243	71.15579	69.67343	94.33657	83.11958	42.38142	52.76711	104.07908	72.13787	61.52910	101.11073	71.37121	105.70194	154.95257	49.23058	45.96139	62.12442	68.40276	61.96789	49.05016	88.86502	39.05006	35.09549	50.24883	64.02954	63.54441	63.26183	56.40706	55.50224	98.22879	80.34481	33.48119	61.79853	28.63798	46.38150	59.01165
X603142576F1	98.31015	236.31518	395.09367	324.44917	263.06566	206.35229	181.97522	264.61330	275.97399	125.69271	252.61503	309.50498	163.64597	65.31987	242.60781	213.44006	209.15922	216.86066	187.36105	287.85613	248.44626	410.94776	247.68256	287.59929	362.64164	365.19940	258.43817	316.37370	296.45383	244.11750	284.40573	265.81623	80.53886	49.64628	315.05503	255.86695	282.99310	255.91197	242.39142
X603142577F1	6900.804	4292.633	6227.272	7327.640	6327.538	8408.991	4988.596	8744.696	5855.684	6668.109	7400.060	3263.056	6275.424	7169.967	6869.622	5683.315	8752.628	3427.397	6050.413	3928.649	5787.752	5313.077	5700.673	8181.057	7282.131	7839.613	3740.641	6690.164	5575.711	4399.785	5621.050	5821.344	5433.960	7917.651	6813.388	6140.112	5589.961	4739.023	6120.709
X603142578F1	24.22721	89.53893	104.86843	52.49427	46.85639	67.85461	48.54427	53.07025	112.03517	26.75711	197.01083	94.85935	47.61572	44.43464	63.11379	69.74539	35.57275	59.12067	46.26089	65.13946	65.32578	44.69313	70.00611	84.06407	50.16629	107.25431	55.64239	78.28812	35.07297	62.61878	69.58032	58.24988	72.56095	19.21101	73.81107	57.44069	44.86887	34.22413	58.14407
X603142579F1	16311.38	14420.53	17293.62	17570.10	14112.41	15462.03	13643.78	17560.10	16509.19	15214.41	14146.03	14892.02	19954.42	17718.93	14644.89	15037.37	16426.14	13742.05	13253.67	15075.19	15692.81	15495.71	14974.66	13259.43	16334.25	15583.81	13532.10	16864.64	14540.69	15257.03	14297.83	13290.14	18650.66	16801.96	14278.12	14603.81	14958.59	14279.75	15765.36
X603142580F1	1728.0057	6151.8027	5219.0943	1513.9214	5083.3139	6567.1823	5923.8779	1644.4545	5798.8097	849.5188	5023.1474	5537.3708	989.9487	1792.1099	6977.1662	6105.8117	1065.2169	5551.9540	4070.5978	3997.4816	6395.0838	6863.0677	6653.4564	5377.2938	5229.8323	4034.1113	4967.4769	5410.5654	7664.5221	6643.8683	6331.5927	6946.5673	873.7626	595.4219	4740.1132	6553.5648	7725.2116	6370.4527	5957.6426
X603142581F1	2041.1938	834.1511	598.3488	1473.2675	454.3808	610.1672	333.4985	2848.5013	265.4403	1033.9275	330.4424	414.4164	3168.2043	3309.8887	286.2889	529.5881	2175.8490	379.3937	1346.2923	889.3042	1683.4594	635.3411	631.2049	652.5480	690.3945	744.2665	738.5476	600.4008	425.3023	576.5709	359.7810	502.5850	1752.6980	3090.8488	201.7029	214.5354	355.7090	386.9598	737.1576
X603142582F1	11575.740	20083.706	21971.435	11470.307	21004.538	20839.824	20525.684	11867.933	23985.917	8946.054	19130.118	18610.305	11263.727	10383.375	22789.009	20841.378	8122.799	20248.157	21274.454	22012.981	23597.597	22251.297	19060.360	16434.051	23006.838	18951.867	17803.045	22559.098	23234.647	20816.382	19673.541	21587.176	11166.712	11554.157	22133.796	22133.796	21593.091	22268.626	22868.462
X603142583F1	8554.307	8351.548	9085.601	10178.824	7070.581	7482.240	8361.643	10348.764	9738.812	9915.004	10124.855	8036.038	11271.236	9919.599	7453.037	7629.789	9984.738	7880.548	6812.850	7119.266	7689.733	8157.139	6751.234	8498.376	8553.344	7987.998	7627.062	8284.039	6693.320	6481.470	7759.211	7810.906	10662.918	10204.680	7418.307	7362.694	8380.917	8224.308	7446.317
X603142584F1	12765.449	18214.502	18727.699	10157.332	14905.036	17003.629	15682.211	14879.433	10310.392	21452.924	13510.356	16369.830	12138.948	12268.993	19444.447	12770.309	12822.330	17376.470	17753.378	16946.643	13333.208	14374.207	19227.384	21335.631	13631.006	17038.862	12413.728	12224.017	14560.681	14174.971	13851.306	17011.476	8942.994	9124.556	16024.925	10823.299	14034.500	14720.339	15649.222
X603142585F1	87.53910	191.98141	131.84659	138.63755	153.73869	198.48647	102.00723	123.17084	148.15915	102.42871	95.48264	200.84402	137.69719	102.45034	162.48102	155.80497	84.58691	198.97045	89.33815	149.79569	105.31385	67.59094	124.14045	166.36217	202.92082	159.56344	146.00326	132.07879	127.26004	118.93476	238.06479	129.65516	92.74959	69.08899	157.20298	169.27743	156.59583	146.73430	143.51578
X603142586F1	3838.310	4539.729	4969.686	3549.494	5060.303	5205.097	5447.979	3425.892	4750.772	4354.268	5075.651	4679.096	3107.530	5943.958	4639.462	4726.367	4331.354	4349.328	3706.054	4653.432	6189.377	3649.289	4921.537	4285.209	5053.383	4285.764	4327.137	5122.303	4259.919	5816.434	4418.781	3529.291	2654.324	2840.218	4575.850	5364.735	3857.153	4025.371	4751.051
X603142588F1	3328.765	2808.932	3576.940	3826.825	3218.638	3106.882	2764.843	3271.991	2767.923	3458.736	2775.469	2910.833	4221.353	3653.538	2470.250	3043.053	3460.386	2848.236	3328.736	3590.222	2846.663	2304.171	3008.534	2741.968	3186.538	2971.187	2668.616	3149.860	2472.194	2748.483	2979.153	2491.104	3388.527	3102.133	3134.536	2804.702	2576.624	2704.856	3571.259
X603142589F1	233.9386	219.6581	267.4130	229.1631	247.7560	258.1743	268.4285	146.0393	498.3964	205.3539	377.4584	231.6608	170.3993	398.1768	222.7355	228.1493	176.4331	188.3796	266.7433	286.8212	535.4775	236.5006	194.4766	342.7613	226.1608	194.7176	210.2577	221.9821	239.1586	188.9401	214.2005	155.4233	319.6671	303.2281	124.2618	209.2746	257.5855	191.5120	197.9726
X603142590F1	4977.976	4591.736	6803.464	5994.106	5376.113	6070.627	3315.715	5706.840	7282.513	4928.688	9195.237	5561.409	7190.514	7054.184	4156.527	5292.882	5699.074	4860.125	4207.806	6589.881	8337.037	5020.212	5537.979	4193.283	6878.150	4906.812	3808.658	6118.940	4669.369	5021.797	4854.641	5139.907	4368.685	4496.491	4975.299	5166.105	5140.289	4218.341	5613.013
X603142591F1	18870.07	20740.64	20755.51	17252.48	18330.34	20880.44	21498.70	17581.75	18486.17	19252.05	20564.94	20020.45	19444.07	16765.84	19630.02	19195.57	18300.85	20569.13	17865.29	15733.60	18050.37	17462.53	19516.27	22405.91	17938.84	19623.20	20178.52	16614.97	20629.73	20698.98	19102.08	19641.98	18215.22	19230.81	17024.27	20670.51	16392.81	18719.20	18536.95
X603142592F1	4570.135	3229.667	3994.571	5326.474	2891.812	2974.173	2886.278	4658.835	2395.500	5403.277	3457.088	2945.313	5524.525	2815.678	2935.670	2915.637	5717.786	3724.581	2623.817	2768.941	2731.758	2549.777	3270.720	2814.199	2807.658	3428.274	2788.991	2930.233	2658.678	2570.885	2841.513	2283.121	5461.363	4580.446	3133.639	2718.710	2351.711	2391.605	2500.368
X603142593F1	2235.7078	1990.1918	3084.7690	2225.0488	1444.3884	2160.7287	1901.1740	1844.5047	1071.8184	1945.7744	2065.5842	1756.9308	1831.7767	898.2439	1785.0022	2165.8397	2184.3216	2106.9803	2127.2714	1706.0767	1753.4333	3234.5397	1754.4238	1797.9795	1514.9446	2901.1754	1813.8653	2041.4890	2515.7871	1592.5682	1828.2252	2386.2342	2106.7015	1838.1743	1217.2855	1424.2337	1731.0981	1695.6427	1681.7454
X603142594F1	8758.815	10677.159	11188.672	10060.779	8432.095	10783.524	12295.310	7747.072	8128.428	9650.980	14645.530	8989.804	8683.722	12280.850	9104.084	9744.969	9643.162	11568.558	8426.652	8053.559	10098.484	7590.853	9003.188	10603.859	9565.153	8635.331	9560.927	9463.148	7945.164	8382.359	9320.975	6229.870	7909.341	10044.710	7821.475	8426.950	8327.484	7756.220	8013.276
X603142595F1	2703.545	6011.609	3756.509	2141.018	5356.793	4877.547	5087.554	2004.448	7143.330	2266.337	4379.609	6262.475	2345.469	3618.469	4777.321	4507.224	1813.048	5078.737	4239.835	7970.683	7635.944	7217.695	5345.101	3223.830	12855.064	3053.463	4688.218	7118.146	6777.555	5008.200	4453.647	6147.180	1517.443	1299.702	5844.065	7441.428	7795.789	5381.996	7011.959
X603142596F1	11.99256	20.36986	15.00893	17.26461	17.23088	18.95835	15.59628	18.54001	21.84789	11.81706	20.05201	21.18474	17.70815	15.49744	19.89366	19.63027	12.85182	14.77452	19.37871	19.61051	22.69860	18.66034	16.92108	17.75505	24.67993	40.73168	17.25105	18.28241	19.30322	17.97667	20.80138	16.49867	16.88319	12.75385	22.34189	24.32536	16.51553	16.99987	19.02364
X603142601F1	13786.90	15546.13	16564.42	14855.79	17507.22	13978.96	14979.54	13930.89	17227.48	13055.68	16572.15	16046.49	14698.17	11852.43	15816.81	14801.90	12588.18	14806.10	16648.19	16592.12	15440.10	18026.42	14808.26	12781.47	16061.80	15503.17	15287.64	15805.44	16516.35	17747.42	13708.49	17620.88	14169.40	15072.75	15375.02	15092.72	17959.68	18670.64	18625.36
X603142602F1	11323.880	12032.951	14646.518	14639.945	11721.179	10214.412	10273.226	13437.654	12513.388	14585.593	15313.893	11703.434	16153.204	13628.729	11553.024	12223.847	13233.007	11635.135	10504.087	12762.447	10190.948	14218.614	10677.447	7929.295	12947.036	11012.620	10271.404	12770.018	11362.764	11554.207	11068.852	13675.546	14565.079	10618.055	11315.246	11873.831	15419.651	12592.217	15312.508
X603142603F1	86.29758	40.01903	43.31454	49.87499	69.05562	57.37336	32.06378	59.28341	44.97264	58.26529	47.39376	60.34808	46.75106	148.47484	48.92251	47.38394	49.29763	40.15645	49.08150	54.02833	56.80410	50.54112	53.90549	51.88250	46.93311	38.41815	42.89147	58.06035	54.86744	52.97231	44.48542	58.07607	96.37938	116.32423	31.24192	61.39909	58.20677	63.29354	40.37779
X603142604F1	2753.662	4030.961	4798.291	3632.712	5257.122	3121.279	3978.281	4524.884	2989.289	4466.324	4368.831	5440.746	4025.692	2903.091	3691.710	3276.763	2495.729	3590.724	3310.639	4513.745	4020.797	3389.196	3594.313	4410.824	5599.631	6803.236	2911.299	3279.804	3174.950	3405.145	4027.547	4843.622	3990.004	2648.863	6034.957	3047.275	3369.055	3664.904	5096.259
X603142605F1	67.547736	148.239564	211.486266	60.986408	271.040913	283.401655	108.464328	100.158677	2938.579142	2.213511	623.721217	125.785733	24.591882	31.015767	120.850022	145.565497	18.801435	164.933229	398.394011	230.243839	3057.336419	248.141365	186.022266	134.352045	187.874267	302.160849	152.591159	254.790820	177.806635	3214.368780	134.575644	198.363680	18.930927	3.607469	201.290619	147.064845	172.150610	190.570486	259.357117
X603142606F1	3767.261	3785.842	4034.733	3429.692	3494.826	4852.745	2905.588	4641.140	5092.317	4134.891	3959.390	3553.174	6700.919	5357.446	3562.379	3683.081	3276.448	3051.791	3309.878	3358.071	4477.551	4338.908	3939.390	2922.560	4011.579	4104.424	2922.421	4025.983	2845.925	3197.705	2897.645	3253.086	3507.918	3042.141	3335.946	3473.863	3833.824	3407.055	3729.403
X603142607F1	8873.463	6682.205	6264.542	10412.612	8255.003	6030.846	5357.940	9243.465	14313.492	9438.209	4832.705	6771.493	11992.831	16383.516	6162.954	5718.751	9528.849	4738.316	6030.268	8762.155	10454.930	6281.394	6748.576	5557.100	9160.793	6899.617	4577.886	9266.570	7320.956	10950.942	6099.710	6680.583	11051.483	9181.837	8268.102	6299.665	6093.910	6394.127	8588.929
X603142608F1	2461.4838	2282.0470	2764.4497	3201.4223	1381.0084	2451.8976	2205.7900	2961.6529	1537.4945	3053.8409	2397.0843	2465.4865	2430.9738	946.6465	1934.8769	2078.2467	3332.2392	2703.7479	1935.6358	1340.8860	1446.1210	1595.9790	2051.9804	2681.6352	1798.4877	2460.9343	2178.5875	1457.0314	1636.6218	1982.9008	2458.4948	2069.6364	2590.5266	2743.6934	1768.0783	2084.8850	1865.0639	1556.0675	1883.9386
X603142609F1	24.60686	142.69981	110.61003	55.43823	66.45120	65.55729	48.73628	138.17531	123.23424	24.00529	56.28069	118.03391	72.72434	33.78828	95.72258	63.93394	29.61376	117.35232	124.80456	26.36150	57.24543	43.68072	80.33036	147.88754	113.63747	101.29584	122.76065	69.29329	115.54030	117.23269	119.35831	46.43668	86.81298	38.06759	42.32490	95.13201	29.36886	93.93895	59.71943
[truncated: 35,925 more rows]

## Sheet: Table_S2
Supplementary Table S2 An R/qtl cross file consisting of all the phenotypes measurements and genotypes of chicken (Gallus gallus) samples used in this study. (Column descriptions are attached)
	Population structure																																		Comb outline
[truncated: 575 more rows]
[truncated: 646 more columns]

## Sheet: Table_S3
Supplementary Table S3 Results of the QTL analysis performed a F8 intercross population generated by breeding the domestic chicken with the Red Junglefowl. (Column descriptions are attached)
[truncated: 11 more rows]

[truncated: 3 more sheets: Table_S4, Table_S5, Table_S6]
